# Supplementary material for: An atlas of cell types in the mammalian epididymis and vas deferens
Source: bioRxiv preprint, doi:10.1101/2020.01.24.918979, version 1 (2020-01-24)
Supplement: Table S1 [file 918979_file14.xlsx]

## Sheet: Sheet1
gene	transcript	CP1	CP2	CP3	CP4	CP5	CP6	CP7	CP8	CP10	CP12	CP13	CP14	CP15	CP16	CP17	CP18	CP20	CP22	CP23	CA1	CA2	CA3	CA4	CA5	CA6	CA7	CA8	CA9	CA10	CA12	CA13	CA14	CA15	CA17	CA18	CA20	CA21	CA22	CO1	CO2	CO3	CO4	CO5	CO6	CO7	CO8	CO9	CO10
0610005C13Rik	NR_038165,NR_038166	1.07	0.38	0.45	1.07	0.42	0.49	0.17	2.63	0.55	0.56	1.28	0.18	0.46	0.4	0.64	1.07	0.77	0.43	1.78	0.51	0.27	0.09	0.36	0.11	0	0.11	0.31	0.09	0	0.17	0	0	0.19	0	0	0.08	0	0.3	0.22	0.18	0.46	0.27	0.05	0.49	0.42	0.11	0.55	0.57
0610007P14Rik	NM_021446	55.43	48.74	58.49	49.72	53.2	55.34	60.06	57.54	53.22	50.28	44.01	58.7	50.43	62.32	64.7	52.79	51.9	53.78	60.36	63.46	64.81	58.72	61.19	65.27	51.08	67.9	65.05	66.54	59.91	58.85	62.11	62.7	61.5	69.15	64.11	66.05	71.03	65.63	52.04	43.62	49.47	51.01	54.07	50.33	55.12	45.76	46.78	51.37
0610009B22Rik	NM_025319	50.73	42.33	47.57	48.95	43.74	42.84	39.52	53.19	44.38	39.29	36.43	36.99	46.01	55.47	48.34	40.22	40.26	41.43	55.93	42.24	47.12	42.12	39.73	38.76	27.33	43.18	47.95	42.51	37.38	41.53	36.02	40.32	35.54	44.89	43.7	45.48	38.81	35.85	46.81	57.47	62.64	53.21	52.69	63.46	51.61	56.07	46.65	52.43
0610009L18Rik	NR_038126	17.82	21.18	22.96	21.62	14.92	17.87	15.21	22.15	17.79	20.69	16.36	17.83	18.77	12.71	16.72	20.85	19.03	21.96	24.78	13.12	16.08	19.09	24.87	13.2	18.24	11.87	18.16	16.67	13.78	13.4	14.78	13.28	13.35	12.66	12.88	11.75	10.43	14.38	25.58	20.97	25.34	25.96	22.4	18.63	22.41	26.13	28.63	20.8
0610009O20Rik	NM_024179	19	23.09	17.51	17.72	19.54	18.68	23.16	20.62	24.17	20.4	16.67	21.66	20.38	24.36	20.32	22.4	22.22	22.07	22.08	22.45	22.74	18.9	24.34	21.93	13.71	18.54	30.24	21.77	23.45	18.57	20.88	25.96	19.67	19.08	23.32	17.91	24.2	24.11	41.96	39.57	35.39	38.98	37.73	46.32	36.11	37.97	36.47	37.83
0610010B08Rik	NM_001177543	2.7	1.44	2.39	0.35	3.39	3.56	2.98	4.89	4.14	2.71	2.37	3.56	2.77	4.04	1.33	3.55	3.79	2.02	3.87	4.67	3.08	2.29	3.59	5.22	4.47	3.91	4.71	4.7	5.61	4.22	4.91	2.73	3.78	0	6.28	4.81	3.47	4.16	3.28	3.81	3.18	4.16	3.61	5.07	3.01	2.74	1.84	3.9
0610010F05Rik	NM_027860	12.27	9.55	8.91	8.34	10.88	10.51	13.33	7.67	11.1	8.47	9.28	10.73	11.13	12.75	10.16	8	6.72	11.35	8.47	7.89	8.76	5.27	6.81	8.4	3.17	7.7	9.8	6.76	7.55	5.88	8.06	9.71	8.03	9.28	9.67	8.63	9.72	8.85	15.4	15.94	10.46	10.4	12.75	18.62	11.56	13.47	12.88	17.01
0610010K14Rik	NM_001177601,NM_001177603,NM_001177606,NM_001177607,NM_026757,NM_145758	46.44	54.15	50.63	53.79	62.38	54.57	61.12	56.9	54.71	57.54	42.61	56.41	61.82	49.26	47.03	53.57	57.89	60.26	47.27	51.12	48.89	53.87	59.54	43.79	62.64	49.29	55.52	51.28	52.67	51.85	47.99	44.36	56.27	49.98	46.48	57.66	49.06	46.23	40.83	45.96	40.83	49.58	46.52	41.79	55.58	47.13	39.98	44.78
0610011F06Rik	NM_026686	55.48	63.55	68.29	59.67	68.21	60.41	54.56	79.81	61.62	62.27	58.41	62.55	60.66	62.74	60.59	61.67	58.69	68.24	74.44	40.2	42.25	51.56	41.76	44.18	38.29	35.16	53.75	46.19	39.45	41.81	47.22	44.37	38.62	46.22	39.45	33.98	41.58	40.86	78.14	81.45	86.94	81.47	82.84	73.76	68.18	77.67	89.96	71.59
0610012G03Rik	NR_027897	21.27	22.98	26.98	29.16	21.07	19.95	19.9	26.3	20.79	28.55	22.23	20.8	20.46	19.03	25.19	25.28	31.48	21.06	27.13	25.19	22.89	24.63	28.43	20.62	24.23	16.85	22.29	25.79	23.53	24.1	21.49	18.91	18.92	26.17	21.19	26.69	17.82	19.36	23.65	23.92	24.33	26.97	26.24	21.83	23.29	23.7	25.61	23.61
0610030E20Rik	NM_026696	3.63	4.47	3.48	3.39	5.23	3.76	4.81	6.46	5.22	2.9	3.73	3.85	4.38	8.28	3.32	3.45	3.56	4.86	6.8	4.28	6.32	3	5.8	6.23	1.99	5.85	10.39	3.95	5.42	4.53	5.5	5.58	5.9	5.68	7.29	4.21	5.85	5.62	9.12	9	7.08	7.65	8.42	11.15	6.2	7.85	7.58	9.51
0610031O16Rik	NR_045760	0	0	0	0	0	0	0.11	0	0	0	0	0	0	0	0	0	0	0	0	0.11	0.3	0.1	0.16	0	0	0.12	0	0.49	0.14	0	0.14	0.37	0.1	0.56	0	0	0.12	0.11	0.86	1.9	0.39	1.14	1	0.55	0.23	0.44	0.24	0.42
0610037L13Rik	NM_028754	19.07	19.3	19.3	24.94	19.02	17.63	16.8	21.42	19.61	22.52	15.41	17.97	18.68	23.67	19.11	21.14	20.2	17.54	26.11	16.89	16.33	18.4	20.18	14.08	21.02	15.22	23.11	18.24	18.3	17.59	16.55	16.19	14.52	18.56	17.18	17.72	17.26	19.68	21.5	29.83	23.02	29.78	23.76	22.24	26.42	25.29	20.42	23.87
0610038B21Rik	NR_028125	0.06	0	0.06	0	0.12	0	0	0.1	0	0.15	0	0	0	0.22	0	0.09	0.05	0	0.27	0	0.05	0.21	0	0	0	0	0	0.21	0	0.05	0.11	0.06	0.16	0	0	0	0	0.06	0.13	0	0	0.09	0.03	0	0	0	0	0.23
0610039K10Rik	NR_028113	0.2	0	0.18	0.64	0.27	0.13	0.37	0.16	0.11	0	0.22	0.11	0.18	0.36	0.13	0.14	0.28	0.08	0.44	0.79	0.95	0.42	0.97	0.85	0.14	0.5	1.03	0.43	0.48	0.41	0.3	0.53	1.08	0.36	0.47	0.59	0.89	0.48	0.64	0.44	0.67	0.67	0.41	0.16	0	0.51	0.32	0.18
0610040B10Rik	NR_027874	7.69	7.26	5.25	7.71	5.45	6.15	6.12	8.2	7.08	6.45	4.54	6.77	7.01	5.87	4.7	7.19	6.83	4.32	8.58	3.8	8.53	7.87	6.18	7.33	6.58	5.1	11.15	11.11	9.23	8.64	5.99	6.32	6.57	5.48	6.92	12.56	7.48	5.43	3.89	9.7	7.86	7.01	7.54	9.5	8.38	12.52	7.53	8.46
0610040F04Rik	NR_040757,NR_104577	13.93	17.09	14.1	28.5	24.87	15.11	16.73	24.67	23.64	23.07	16.73	20.15	21.79	34.06	22.34	17.8	27.24	17.47	21.27	0.28	0.42	0.21	1.1	0.44	1.2	0.96	1.17	0.31	0.21	1.3	0.8	0.58	0.59	0.15	0.96	0.76	0.55	0.59	0.58	0.54	0.41	0.38	0.27	0.19	0.42	0.31	0.31	0.45
0610040J01Rik	NM_029554	0.92	0.49	0.22	0.32	0.43	0.51	0.5	0.97	0.64	1.16	1.44	0.63	0.6	0.23	0.44	0.98	0.46	0.86	1.75	0.93	0.77	0.54	0.27	0.68	0.61	0.44	0.87	0.5	0.3	0.4	0.42	0.47	0.4	0.83	0.38	0.58	0.47	0.56	0	0.16	0.05	0	0.13	0.15	0.1	0.13	0.1	0
0610043K17Rik	NR_040640	1.71	0.95	1.01	1	1.39	0.94	1.63	0.75	0.52	1.34	1.85	1.53	1.4	0.76	1.82	1.35	2.05	1.47	0.42	2.63	1.09	2.83	0.98	3.01	1.11	2.77	2.83	2.52	1.34	1.42	2.67	1.71	1.29	3.41	3.22	2.32	2.82	1.69	5.19	3.96	3.02	3.27	5.45	2.74	4.3	4.43	4.17	2.6
1010001N08Rik	NR_105022,NR_105023	0.13	0.22	0.13	0	0	0.09	0	0.23	0.61	0.73	0.11	0	0.35	0.17	0	0.82	0.61	0.55	0.13	0	0.62	0.25	0	0.15	0.2	0.15	0.41	0.36	0.67	0.47	0.26	0.16	0	0	0.45	1.42	0	0.56	0.44	0.63	0.97	0.6	0.44	0.91	0.29	0.74	0.76	1.85
1110001J03Rik	NM_025363	68.76	100.51	79.23	100.95	60.39	63.84	57.53	105.42	66.81	115.32	67.37	79.32	58.16	77.21	67.95	104.38	102.65	72.8	91.04	84.56	92.57	116.01	100.11	72.6	102.35	58.16	90.34	108.72	99.05	95.14	84.47	75.85	65.28	73.77	75.52	91.26	86.15	79.47	66.22	67.01	78.35	85.62	68.13	57.95	57.35	76.69	66.38	57.35
1110002L01Rik	NR_030694	3.8	2.85	2.15	2.59	3.54	2.1	5.36	2.63	3.48	2.35	2.84	2.76	4.74	3.03	3.87	1.93	1.7	2.93	2.91	3.94	2.51	4.12	1.33	5.4	2.11	5.26	4.32	3.02	3.54	3.44	3.97	4.49	4.56	5.26	3.84	3.07	5.2	4.77	6.71	7.27	4.38	4.51	5.15	6.64	7.28	7.28	5.54	5.16
1110004E09Rik	NM_026502	35.15	30.41	28.4	29.63	33.6	29.22	32.27	37.29	30.79	34.34	33.75	29.13	36.61	31.54	31.44	29.21	26.65	32.41	37.5	38.55	31.65	34.97	30.33	35.63	33.84	31.12	38.17	32.86	33.28	32.94	38.34	30.91	35.39	35.21	31.13	36.42	31.82	34.44	39.52	40.4	35.9	44.37	44.3	36.49	38.5	39.21	45.58	38.7
1110004F10Rik	NM_019772	115.25	101.5	116.73	104.2	97.63	104.53	102.31	99.44	110.09	92.44	86.71	103.84	101.35	112.72	104.63	106.13	97.51	102.59	119.01	98.68	95.37	94.71	93.34	95.45	69.47	94.22	109.63	97.22	103.27	93.58	92.33	98.71	97.05	111.1	103	105.92	96.21	96.78	107.77	108.34	113.17	112.32	112.63	106.44	110	117.86	116.77	116.88
1110006O24Rik	NR_027810	1.84	2.46	2.95	3.7	4.22	3.35	2.67	3.54	2.6	3.27	2.1	3.75	4.31	4.04	2.72	2.84	3.6	4.2	3.99	4.05	3.57	2.66	4.68	3.44	3.33	3.19	3.34	4.31	4.39	4.7	3.7	4.28	3.17	3.45	2.93	6.39	2.36	2.65	3.32	2.73	3.77	4.01	4.83	3.14	3.27	4.15	2.24	2.97
1110007C09Rik	NM_026738	28.41	33.73	33.17	51.65	38.16	32.12	32.07	28.85	34.22	39.62	28.69	30.3	32.83	26.76	33.16	37.21	40	35.04	31.49	66.41	62.32	79.88	81.72	66.52	73.98	65.42	74.06	70.08	62.75	68.74	73.25	76.22	74.96	65.54	63.45	72.21	63.7	69.55	65.59	72.69	77.54	94.19	76.27	70.16	81.15	69.41	73.34	55.94
1110008F13Rik	NM_026124	55.5	63.27	54.43	47.27	53.19	52.41	52.36	57.93	54.7	59.43	48.97	56.6	55.47	58.91	61.4	59.5	65.84	53.68	49.95	52.72	51.36	56.85	54.29	45.31	57.17	41.45	51.17	60.12	49.42	54.51	48.03	48.04	44.82	52.39	49.56	53.78	52.53	52.59	54.18	51.25	54.37	57.59	53.8	53.33	62.48	57.27	51.34	56.68
1110008L16Rik	NM_025373	7.59	6.99	6.63	7.22	6.98	6.65	7.98	6.43	7.12	4.68	6.44	7.4	6.49	7.05	7.08	5.32	4.64	7.24	7.02	5.85	5.41	5.18	5.01	5.07	3.79	5.58	5.32	5.67	5.34	4.78	4.97	7.15	4.88	7.66	7.25	5.92	5.57	5.75	7.41	7.05	6.27	6.56	7.95	6.87	5.65	8.31	7.42	6.99
1110008P14Rik	NM_198001	138.26	169.7	184.29	199.45	198.41	163.69	151.01	198.27	156.66	205.63	171.93	195.34	158.3	176.64	187.02	189.73	212.62	166.65	178.11	63.45	59.69	77.46	82.66	57.95	60.35	39.5	65.1	59.6	63.49	77.28	58.08	57.46	54.3	51.24	57.51	64.26	44.68	58.83	99.57	92.43	123.35	130.25	110.19	95.59	106.33	109.37	107.66	80.94
1110012L19Rik	NM_026787	19.43	22.26	16.31	18.92	16.05	17.48	17.94	21	18.68	23.54	13.41	15.65	16.01	24.19	14.13	22.03	23.91	19.72	27.93	22.03	20.69	28.76	24.24	20.54	24.19	19.58	32.25	24.25	23.85	23.15	18.72	19.2	18.94	22.45	20.55	21.43	21.04	21.58	21.12	20.94	20.37	20.83	18.05	19.63	22.45	22.97	17.2	22.94
1110015O18Rik	NR_045272	0	0	0	0	0	0	0	0	0	0	0	0	0	0	0	0	0	0	0	0	0	0	0	0	0	0	0	0	0	0	0	0	0	0	0	0	0	0	0	0	0	0	0	0	0	0	0	0
1110017D15Rik	NM_001048005,NM_001253777,NM_001253778,NM_001253780,NM_001253788,NM_028624,NR_045549,NR_045551	4.53	3.7	1.87	2.24	3.06	2.88	2.58	7.22	2.35	4.86	6.05	3.24	19.52	4.82	2.47	3.39	4.12	5.51	8.55	0.18	0.29	0.68	0	0.71	1.67	0.33	2.25	0.78	1.42	0.76	0.26	2.07	1.37	0.5	0.67	0.6	4.31	1.13	2.74	3.24	3.82	3.76	0.83	2.2	1.89	3.25	3.63	1.39
1110019D14Rik	NR_045995	0.06	0	0	0	0.13	0.04	0.11	0	0.14	0	0.05	0.13	0.22	0.07	0	0	0.12	0	0.17	0.18	0	0.05	0.34	0.07	0.09	0.06	0	0.16	0.07	0	0.04	0	0	0.15	0.1	0.06	0.13	0	0.2	0.07	0	0	0.06	0	0.06	0.24	0	0
1110020A21Rik	NR_027929,NR_027930	4.79	3.89	5.17	3.79	4.27	4.23	4.22	6.68	5.57	3.21	2.5	3.22	9.3	5.87	3.82	3.81	2.7	4.1	6.81	3.3	4.16	3.75	3.64	3.51	2.66	4.39	3.98	3.3	3.77	4.84	4.16	3.94	4.1	4.17	5.06	4.29	3.99	5.32	4.26	4.41	4.98	4.4	5.26	3.78	4.28	5.43	3.54	4.9
1110025L11Rik	NM_001276278	0	0	0	0	0	0	0	0	0	0	0	0	0.15	0	0	0	0	0	0	0	0	0	0	0	0	0	0	0	0	0	0	0	0	0	0	0	0	0	0	0	0	0	0	0	0	0	0	0
1110028F11Rik	NR_045139	0.36	0.08	0.37	0.07	0.2	0.15	0.43	0.16	0.18	0.09	0.27	0.07	0.44	0.04	0.22	0.05	0	0.2	0.06	0.17	0.26	0.34	0.16	0.43	0.09	0.7	0.25	0.2	0.25	0.17	0.35	0.5	0.21	0.45	0.21	0.37	0.6	0.16	0.4	0.52	0.37	0.3	0.42	0.58	0.54	0.3	0.43	0.49
1110028F18Rik	NR_045470	0.14	0	0	0	0.23	0.04	0.13	0	0	0.18	0.05	0	0.12	0	0	0.1	0.06	0.06	0	0	0.24	0.06	0	0.07	0.1	0.42	0	0.12	0	0.28	0.04	0.07	0.12	0.25	0	0.07	0.22	0	0.22	0.08	0.08	0.07	0.04	0	0.14	0	0.15	0
1110032A03Rik	NM_023483	40.9	37.41	45.6	36.11	40.03	42.33	39.2	43.25	43.1	33.96	34.64	38.98	47.68	42.68	39.76	36.21	36.06	34.39	46.21	42.22	42.87	47.17	45.58	41.51	36.54	45.53	52.79	44.86	49.39	46.78	45.08	39.33	46.13	46.54	46.22	45.09	47.87	38.68	65.77	67.45	77.16	71.65	74.24	69.31	77.05	80.68	65.46	65.53
1110032F04Rik	NM_001167996	1.78	1.72	1.76	1.44	3.01	2.07	1.98	1.61	1.55	0.84	1.37	1.38	1.34	2.43	2.31	2.02	1.65	1.85	1.1	0	0.03	0	0	0	0.05	0	0	0.06	0.13	0.03	0	0.04	0.06	0	0.11	0.11	0	0.03	0.19	0.24	0.12	0.18	0.15	0.11	0.14	0.23	0.45	0.06
1110034G24Rik	NM_028637	3.04	6.22	3.31	2.28	3.62	3.87	3.37	5	3.3	6.44	3.51	3.28	3.05	5.17	3.31	5.29	4.46	2.05	5.49	6.36	5.37	9.37	6.8	5.34	6.12	4.23	9.75	7.01	6.11	8	7.12	5.13	4.93	6.56	5.2	6.61	6.89	5.17	3.96	3.06	3.35	3.27	3.1	4.03	4.18	4.38	3.4	3.8
1110036E04Rik	NR_040713	0	0	0	0	0	0	0	0	0	0	0	0	0	0	0	0	0	0	0	0	0	0	0	0.26	0	0	0	0	0	0	0	0	0	0	0	0	0	0	0	0	0	0	0	0	0	0	0	0
1110037F02Rik	NM_001081183	13.87	12.03	10.93	8.31	12.63	11.78	15.63	9.09	16.86	9.33	11.07	14.77	13.32	14.05	13.71	9.65	8.13	13.98	9.83	11.34	12.22	6.81	8.41	12.95	4.62	12.26	11.75	9.14	11.61	8.89	11.07	14.58	11.14	12.14	12.97	10.02	13.22	12.65	20.59	18.24	13.1	15.17	15.3	22.62	12.47	15.62	17.65	21.48
1110038B12Rik	NR_015536,NR_027943	74.11	65.64	83.7	81.51	104.85	99.2	93.2	48.57	63.31	71.87	86.87	84.72	93.52	59.47	71.45	59.18	67.44	91.43	52.46	80.22	82.2	85.86	87.93	72.65	91.99	86.24	68.85	90.13	79.77	82.97	80.28	66.61	87.22	89.18	70.13	84.2	65.72	70.64	46.81	51.54	47.92	53.15	54.12	46.57	60.16	53.37	47.59	53.83
1110038F14Rik	NM_054099	18.54	22.58	15.85	25.08	20.87	19.53	19.66	27.22	18.16	27.13	17.13	18.24	21.56	21.75	20.61	21.92	22.01	20.29	29.16	16.82	18.97	19.91	23.39	15.31	19.19	14.67	23.93	17.92	19.2	19.02	15.97	15.54	15.52	16.52	19.07	21.76	14.11	17.15	19.52	18.56	20.46	23.09	21.96	21.27	17.99	24.55	19.55	18.41
1110046J04Rik	NR_040707	1.09	2.09	0.78	1.31	1.11	0.65	0.92	1.07	0.95	0.98	0.73	1.45	0.55	1.68	0.64	2.98	2.18	1.14	0.88	1.58	1.85	2.41	1.62	1.44	2.42	0.64	2.2	0.74	1.95	2.02	1.57	0.92	1.25	0.74	1.35	2.69	2.4	1.55	0.68	0.5	0.6	0.77	0.58	1.77	0.75	0.63	1.44	0.9
1110051M20Rik	NM_175123	9.86	9.07	8.32	10.31	9.87	8.32	10.69	13.48	9.78	12.3	6.39	10.02	10.11	12.66	12.31	11.96	12.26	10.26	8.75	11.04	12.19	8.91	10.09	9.87	7.9	9.01	11.46	10.46	11.81	9.58	9.93	7.48	9.9	11.14	9.81	10.16	8.84	9.36	5.15	5.39	4.81	6.8	5.57	5.28	6.85	5.69	4.66	5.85
1110054M08Rik	NR_037954	7.61	7.71	6.35	5.44	8.04	5.14	5.1	9.29	8.58	10.22	7.23	5.28	7.44	7.9	5.12	7.12	7.14	6.38	8.27	18.3	20.94	21.54	19.35	16.99	18.09	14.82	19.76	20.77	22.96	22.94	16.72	12.52	17.38	15.94	21.22	19.97	17.32	16	26.06	24.39	28.9	30.41	29.2	23.94	27.07	32.17	23.26	22.53
1110057K04Rik	NM_001167767,NM_001167768,NM_172401	23.25	22.32	20.4	15.41	22.24	20.64	25.68	19.63	27.43	19.84	19.86	22.46	22.57	27.48	24.54	21.01	19.47	23.98	20.35	20.98	20.96	16.43	20.67	23.52	12.67	21.02	23.54	19.59	19.96	20.83	22.49	24.54	22.58	21.75	21.44	22.64	22.08	21.94	32.38	29.36	26.39	26.62	28.67	30.78	26.96	28.89	28.87	31.04
1110058L19Rik	NM_026503	40.01	50.61	39.01	50.06	34.77	39.28	33.56	56.3	33.59	53.77	32.94	35.95	39.86	45.39	38.29	50.85	49.96	41.03	52.55	59.72	60.49	67.15	54.25	42.83	55.87	51.67	54.47	59.26	59.1	66.76	48.61	37.4	51.94	41.18	54.28	62.37	55.86	48	49.83	45.4	53.31	51.12	47.05	37.51	51.27	57.15	51.12	42.08
1110059E24Rik	NM_025423	30.88	27.73	27.98	32.14	23.44	27.01	24.12	27.53	27.69	27.88	22.88	22.15	24.93	24.8	20.15	28.58	23.7	24.54	36.13	48.67	46.46	43.96	34.55	37.84	35.82	41.93	47.7	45.61	44.75	42.14	42.93	39.44	43.06	44.75	50.7	45.39	39.44	40.44	43.02	49.17	41.65	36.83	39.39	49.39	44.9	50.88	43.88	49.41
1110059G10Rik	NM_025419	4.76	4.55	4.06	5.61	4.05	4	3.31	4.79	4.48	5.11	2.89	3.02	3.74	5.24	4.3	4.85	4.88	4.01	6.49	4.86	4.77	5.34	5.26	3.57	4.29	4.28	6.06	5	6.32	5	4.52	4.08	3.75	5.45	5.41	6.23	3.9	3.79	4.56	5.33	4.7	4.37	4.91	5.12	5.47	5.8	5.05	5.97
1110065P20Rik	NM_001142727	69.21	96.83	83.77	83.21	93.68	86.91	84.84	88.74	74.65	106.68	88.37	91.55	82.31	89.98	79.68	102.74	105.89	83.94	81.56	87.21	83.83	89.51	85.41	68.81	101.64	62.67	73.71	78.99	76.59	78.79	69.48	67.39	63.53	82.91	69.92	84.32	58.8	72.41	50.68	49.12	65.34	67.19	52.76	55.57	61.83	53.46	65.76	57.42
1190002F15Rik	NR_037955,NR_037956	1.48	0.76	1.84	2.13	1.37	1.21	2.01	1.98	1.11	3	1.85	0.91	1.95	0.41	2.15	2.4	1.1	1.09	2.7	0.97	2.33	2.59	2.33	1.93	2.15	1.05	1.52	1.98	0.82	1.38	0.51	0.18	0	1.62	1.06	2.64	1.42	0.98	2.15	2.94	1.9	1.83	2.65	1.6	2.21	4.72	2.62	0.62
1190002N15Rik	NM_001033145	6.34	5.35	4.61	4.03	5.42	5.38	6.79	2.79	6.41	5.2	3.6	6.27	5.12	4.5	5.27	5.13	4.83	6.52	3.57	6.79	8.17	6.46	6.43	7.43	4.05	12.52	10.48	6.26	8.89	7.76	8.8	9.8	10.52	9.62	9.96	6.22	7.56	10.84	19.19	20.78	14.12	14.32	19.09	23.17	20.1	23.03	17.24	22.78
1190003K10Rik	NM_001195435	0	0	0	0	0	0	0	0	0	0	0	0	0	0	0	0	0	0	0	0	0	0	0	0	0	0	0	0	0	0	0	0	0	0	0	0	0	0	0	0	0	0	0	0	0	0	0	0
1190005I06Rik	NM_197988	2.71	4.36	2.98	1.94	3.1	2.06	2.2	3.82	3.73	5.55	2.3	2.67	1.63	2.99	1.34	2.24	2.56	3.31	3.03	1.54	2.5	2.57	2.63	1.81	4.23	2.82	0.98	1.55	2.07	3.32	3.09	1.83	2.86	3.15	1.85	2.06	2.48	2.91	1.25	1.58	1.47	1.09	1.67	1.65	2.38	2.68	2.08	4.32
1190007I07Rik	NM_001135567,NM_001135568,NM_001135569	10.87	8.58	6.39	9.16	11.63	7.64	8.35	11.42	10.66	11.86	9.46	7.86	8.99	10.02	9.79	12.77	12.29	8.7	11.86	10.62	9.21	11.14	6.27	9.43	9.55	8.8	12.3	12.22	9.48	8.94	8.04	7.37	8.57	12.54	8.82	7.21	7.04	8.84	14.79	16.01	17.89	15.77	16.96	16.62	15.99	17.63	15.36	14.02
1200014J11Rik	NM_025818	7.15	6.13	5.48	5.26	5.95	5.46	7.05	6.25	7.38	4.76	5.11	6.79	6	7.99	6.76	5.87	4.51	6.46	6.01	7.14	8.14	4.9	6.34	7.31	3.3	6.35	7.75	6.96	7.58	5.85	6.82	7.43	6.72	8.02	8.83	6.29	6.99	6.8	6.88	7.52	5.59	6.21	7.12	8.51	5.75	5.72	7.23	8.17
1300002E11Rik	NR_037957,NR_037958	16.09	19.03	16.17	22.61	18.67	19.23	17.24	20.55	16.61	16.42	16.9	16.6	15.7	20.53	16.12	17.51	20.27	18.15	18.94	31.23	28.7	34.37	35.13	31.38	24.69	25.05	24.42	32.41	31.28	36.32	27.5	21.78	27.99	26.69	30.87	29.01	30.43	24.02	36.18	40.04	34.85	38.12	33.17	37.53	44.53	49.39	38.23	40.71
1300017J02Rik	NM_027918	0.32	0.12	0.18	0	0.22	0.31	0.37	0.13	0.04	0.1	0.15	0.09	0.71	0.38	0.05	0.29	0.11	0.17	0.25	0.72	0.52	0.38	0.22	0.55	0.56	0.56	0.35	0.48	0.34	0.36	0.46	0.17	0.43	0.1	0.31	0.16	0.42	0.42	0.26	0.36	0.35	0.52	0.39	0.38	0.2	0.26	0.34	0.59
1500004A13Rik	NR_015498	0.83	0.59	0.36	0.49	1.07	0.64	0.75	1.11	0.79	0.39	0.62	1.07	0.55	1.62	1.06	0.57	0.45	0.96	0.99	0.75	1.14	0.33	0.83	1.08	0.18	1.36	1.63	0.64	0.82	0.65	0.87	1.18	1.35	0.45	0.88	0.81	1.14	0.72	0.62	0.82	0.18	0.79	0.32	0.83	0.31	1.23	0.25	0.65
1500009C09Rik	NR_037697,NR_037698	0	0	0	0	0	0	0.06	0.05	0.07	0	0	0	0.16	0	0	0	0	0	0	0	0	0	0	0.06	0	0.06	0	0.1	0.07	0	0	0.19	0.11	0	0.09	0.3	0.06	0	0.19	0.07	0	0.19	0.06	0	0.06	0	0	0
1500009L16Rik	NM_001145198	29.58	30.18	32.53	26.83	27.34	37.97	30.37	24.94	26.62	29.64	29.91	33.66	32.22	31.98	24.87	27.41	26.07	31.26	36.14	7.43	8.56	11.45	4.3	6.55	7.63	7.17	8.91	9.16	7.12	7.63	7.15	5.73	8.11	8.61	8.55	7.66	7.74	8.32	3.5	3.79	4.6	3.01	5.21	3.3	5.9	2.32	7.45	4.87
1500011B03Rik	NR_027817,NR_027818	461.01	463.27	563.4	538.78	434.43	434.79	386.08	495.64	396.09	538.74	401.23	424.39	446.28	351.28	388.14	459.71	455.77	431.42	570.3	1544.12	1472.53	1599.46	1652.49	1369.3	1224.28	1138.1	1089.69	1500.31	1283.37	1603.6	1304.08	1048.04	1286.34	1414.19	1324.42	1446.61	1255.92	1125.17	577.45	593.7	660.46	685.82	625.25	507.79	633.93	582.18	678.69	486.92
1500011K16Rik	NR_015476	25.6	40.29	26.65	45.94	30.09	22.11	21.47	33.78	29.52	44.44	27.65	25.6	23.66	28.9	30	40.38	42.04	26.21	38.21	49.59	52.77	51.35	49.68	34.82	45.23	30.48	53.75	47.29	47.59	55.39	44.8	36.17	39.26	45.66	41.11	42.91	44.31	40.41	59.35	71	62.34	72.44	64.11	59.15	67.35	81.44	69.06	53.48
1500012F01Rik	NM_001081005	181.3	245.73	186.01	283.55	217.6	251.3	205.9	141.36	173.34	261.56	218.87	212.36	241.1	125.93	149.2	255.43	248.87	225.66	133.17	255.76	288.88	277.88	295.11	212.69	305.07	249.08	144.02	261.3	244.66	259.87	232.63	184.72	267.84	221.06	211.54	304.1	224.35	245.68	88.33	107.51	100.76	144.81	97.94	103.82	190.71	150.14	102.82	113.36
1500012K07Rik	NR_045812,NR_045814	0.63	0.6	0.73	0	0.65	0.21	0.15	0.25	0.7	0.41	0.23	0.52	0.14	1.15	0.41	0.91	0.3	0.14	1.14	12.93	10.11	13.39	11.62	9.21	11.64	10.48	13.21	16.93	7.02	13.93	16.15	11.31	12.24	11.92	8.15	10.19	13.49	10.06	14.81	15.75	15.85	15.09	16	16.38	18.73	21.07	10.04	12.6
1500015A07Rik	NR_029432	1.89	1.76	1.56	2.11	3.3	2.23	2.45	2.64	2.26	1.96	1.84	2.61	2.56	3.75	1.39	2.53	1.97	2.67	2.55	2.79	2.45	2.01	1.44	2.3	1.98	3.4	3.63	2.98	1.91	2.95	2.18	1.98	2.21	2.21	1.84	1.86	1.92	1.97	1.74	2.18	1.69	0.95	2.48	1.61	1.98	1.78	1.46	1.35
1500015L24Rik	NR_045817	2.3	1.68	0.78	0	1.58	0.65	1.6	1.46	2.97	1.46	0.63	1.06	1.42	1.48	1.89	0.53	1.95	1.24	1.97	1.21	1.71	2.62	0.94	1.83	0.69	1.38	2.2	1.56	1.64	1.51	0.45	1.71	1	1.78	1.35	0.73	0.39	0.95	2.36	4.18	2.89	0.96	3.39	2.9	2.98	2.68	2.73	2.25
1500015O10Rik	NM_024283	10.41	33.69	13.11	50.15	20.38	18.57	18.46	6.57	41.77	46.66	11.97	19.66	12.48	22.24	15.74	63.6	50.31	29.68	22.82	38.65	67.68	40.6	93.17	26.51	59.83	22.47	30.47	39.92	88.62	68.85	21.79	15.53	22.63	29.39	50.33	59.45	36.19	74.06	27.87	55.98	42.67	67.84	33.39	67.9	46.92	49.22	38.98	82.79
1500017E21Rik	NR_033510	0	0.05	0	0	0.2	0.07	0	0	0.24	0	0.06	0.14	0.06	0	0	0.36	0.07	0	0	0	0	0.09	0.21	0	0.5	0	0.15	0.13	0	0	0	0	0	0	0.31	0	0.13	0.08	0.1	0	0	0	0.16	0	0	0	0	0
1600002D24Rik	NR_040484,NR_040485	0.1	0	0	0	0	0	0	0.12	0	0	0	0	0	0.06	0	0	0.45	0	0.04	0	0	0	0	0	0	0	0	0	0	0	0	0	0.27	0	0	0.05	0	0	0.26	0	0	0	0	0	0.25	0	0	0
1600002H07Rik	NM_028056	2.23	2.28	1.59	2.47	2.77	2.7	3.22	3.02	3.08	1.34	2.25	2.76	2.74	2.85	2.47	0.86	1.59	2.9	1.68	2.76	2.47	2.5	2.92	2.35	1.83	2.77	4.34	2.99	2.49	2.74	2.93	1.76	3.3	2.33	2.72	2.76	2.61	2.44	1.87	1.9	2.02	1.6	1.46	2.68	1.8	1.66	2.77	2.03
1600002K03Rik	NM_027207	17.6	15.1	13.03	17.34	13.31	18.36	14.24	17.66	13.4	18.45	14.94	17.82	20	18.29	10.3	16.98	14.83	15.1	21.21	10.68	10.97	14.63	16.84	7.43	12.4	11.82	24.97	12.41	12.14	11.59	9.66	10.29	11	11.28	8.2	8.94	10.81	11.28	15.2	10.91	11.22	17.85	17.21	14.57	16.09	10.66	12.13	13.4
1600010M07Rik	NR_037959	0.47	0.12	0.14	0	0	0.1	0.15	0	0	0.54	0.23	0.17	0	0.38	0	0.45	0.88	0.94	0.56	0.16	0.69	0.54	2.63	0	0.22	0.33	0.24	0.13	0.19	0.26	0.1	0.34	0.29	0.19	0.25	0.16	0	0.62	0.17	0.52	0	0	0.32	0.5	0.16	0.61	0.17	0
1600012H06Rik	NM_001083880,NM_001083881,NM_001083882,NM_026451	12.92	11.31	12.91	11.79	15.11	11.83	12.35	13.26	15.83	10.69	10.86	11.91	12.89	16.08	12.25	13.21	10.83	12.58	17.45	13.6	13.1	13.34	11.71	14.84	8.9	15.99	19.54	14.02	15.18	13.63	13.54	12.83	12.88	16.04	15.93	12.32	14.86	12.88	20.2	20.33	19.06	20.74	18.49	22.25	19.24	23.98	21.12	20.3
1600014C10Rik	NM_001085385,NM_028166	16.84	22.74	13.63	19.56	16.3	12.71	14.47	17.06	24.73	22.8	11.25	22.49	14.51	24.3	18.89	27.49	24.45	21.73	19.34	4.64	5.86	3.95	7.3	4.89	3.19	4.72	12.26	3.85	6.96	9.25	5.64	5.23	6.42	3.88	6.13	5.83	6.4	7.16	6.83	8.11	4.88	7.3	6.48	8.49	4.89	6.02	5.82	8.55
1600014C23Rik	NM_028164	0.38	1.44	1.4	1.21	2.33	1.02	2.17	1.21	1.68	1.3	1.12	2.08	1.03	2.55	3.67	1.64	3.03	1.63	2.04	1.12	1.16	0.16	1.32	0.81	0.82	1.4	0.87	1.44	0.7	0.47	1.16	1.04	0.88	1.37	0.91	0.75	1.21	0.37	0.2	0	0	0.1	0.19	0	0	0	0	0
1600014K23Rik	NM_028046	0.22	0.34	0.1	1.68	0.54	0.3	0.32	0.18	0	0.19	0	0.73	0.6	0.27	0.15	0.16	0.95	0.38	0.2	0	0	0.1	0	0	0	0	0	0.1	0	0	0	0.12	0	0	0	0	0	0	0	0	0.25	0	0.06	0	0	0	0	0
1600015I10Rik	NM_001081273	0	0.03	0	0	0	0	0	0	0	0	0	0	0	0.04	0	0	0	0	0	0	0	0	0	0	0	0	0.05	0	0	0	0	0	0	0	0	0.04	0.12	0	0	0.04	0	0	0	0	0	0	0	0
1600019K03Rik	NR_040481	0	0	0	0	0	0	0	0	0	0	0	0	0	0	0	0	0	0	0	0	0	0	0	0	0	0	0	0	0	0	0	0	0	0	0	0	0	0	0	0	0	0	0	0	0	0	0	0
1600020E01Rik	NR_037960,NR_037961	15.81	16.2	13.58	10.29	17.33	15.62	16.75	21.4	15.86	23.24	16.06	18.58	23.59	18.34	12.26	22.06	15.79	20.98	21.85	20.06	16.15	19.76	17.14	15.82	23.08	20.52	30.52	15.8	17.52	17.75	18.77	16.52	21.58	18.24	18.53	23.16	14.13	16.48	26.41	24.62	24.66	23.16	24.1	22.12	29.51	30.01	23.52	24.38
1600023N17Rik	NR_073433	1.66	0.78	1.1	0	1.71	1.64	1.3	1.55	1.53	0.71	0.75	1.6	1.24	2.57	0.6	1.2	0.96	2.11	1.5	0.28	0.32	0.72	0.71	0.79	1.31	1.04	2.08	1.34	0.45	0.84	0.62	0.8	0.68	1.13	0.58	0.46	0.79	0.45	1	1.34	1.77	0.68	2.01	0.73	1.32	1.44	0.69	2.05
1600025M17Rik	NR_038168	0.18	0	0	0	0	0	0	0	0	0.31	0	0	0.16	0	0	0	0	0	0	0	0.16	0	0	0	0	0	0	0	0	0	0.44	0.2	0.16	0	0	0	0.38	0.7	0	0.2	0	0	0	0	0	0	0	0
1600027J07Rik	NR_036588	0	0	0	0	0	0	0	0	0	0	0	0	0	0	0	0	0	0	0	0	0	0	0	0	0	0	0	0	0	0	0	0	0.19	0	0	0	0	0	0	0	0	0	0	0	0	0	0	0
1600029I14Rik	NR_028123	0.9	0.7	0.7	0.47	0.97	0.58	0.72	1.65	1.33	1.82	0.89	0.35	0.39	1.32	0.42	1.25	0.51	0.74	2.45	0	0	0	0	0	0	0	0.16	0	0.27	0.09	0.13	0	0	0.27	0	0	0	0	0.23	0.12	0	0.91	0.22	0	0	0.42	0.12	0.4
1600029O15Rik	NR_033522	0.21	0.29	0.62	0.54	0.14	0.14	0.08	0.47	0.22	0.41	0.18	0.11	0.17	0.11	0.88	0.22	0.7	0	0.28	0.2	0.05	0.09	0.3	0.27	0	0.06	0.07	0.12	0.49	0.44	0.15	0.05	0.25	0.09	0.24	0.11	0.26	0.05	0.2	0.27	0.06	0.13	0.1	0.29	0.41	0.18	0.27	0.19
1700001C02Rik	NM_029285	1.46	1.02	0.49	0	1.01	0.62	1.01	3.74	0.44	2.41	2.48	1.02	4.08	1.3	0.35	0.19	0.88	1.37	3.97	0.13	0.12	0.81	0.75	0	0.76	0	0.61	0	0	0	0.08	0.87	0.25	0	0.21	0	0.57	0	0.58	0.44	0.61	1.12	0.34	0.43	0.14	1.73	0.29	0.25
1700001C19Rik	NM_001172091,NM_029296	0.41	0.42	0.21	1.92	0.52	0.41	0.32	0.6	0.31	0.35	0.66	0.37	5.13	0.74	0.18	1.28	0.42	0.46	0.8	0.62	0.84	0.83	2.22	0.44	1.16	0.57	1.43	0.65	1.52	0.57	0.76	0.81	0.62	0.5	0.44	0.55	1.53	0.66	0.22	0.61	1.08	0.83	0.21	0.27	0.35	0.71	0.51	0.25
1700001D01Rik	NR_045475	0	0	0	0	0	0	0	0	0	0	0	0	0	0	0	0	0	0	0	0	0	0	0	0	0	0	0	0	0	0	0	0	0	0	0	0	0	0	0	0	0	0	0	0	0	0	0	0
1700001F09Rik	NM_027940	0.53	0	0.68	0	0.32	0.98	0.95	1	0.71	1.73	1.27	0.96	29.26	0.27	0.46	1.7	3.28	1.43	3.99	0.98	2.03	1.51	0.45	0.7	1.57	0.62	4.15	1.21	0	0.97	0	0.54	0.7	0.99	1.35	0.76	2.2	2.22	1.08	3.48	5.19	3.59	2.47	3.54	1.94	4.75	2.58	3.17
1700001G01Rik	NR_130158	0	0	0	0	0	0	0	0	0	0	0	0	0.05	0	0	0	0	0	0	0	0	0	0	0	0	0	0	0	0	0	0	0	0	0	0	0	0	0	0	0	0	0	0	0	0	0	0	0
1700001G11Rik	NR_038077	0.49	1.05	0.91	0	0.84	0.98	1.16	1.08	0.68	1.69	0.73	0.67	5.3	1.49	0.97	1.6	1.16	0.73	1.55	0.86	1.51	1.06	0.26	1.59	1.05	1.15	1.3	2.01	1.06	1.12	1.66	0.8	1.02	1.36	1.17	1.59	1.31	1.44	1.19	0.27	0.84	0.65	2.1	0.39	1.26	1.6	1.19	0.68
1700001G17Rik	NR_033199	1.37	2.18	0.97	1.59	1.59	0.91	1.29	2.02	1.75	1.63	1.72	0.8	1.23	2.04	2.73	1.67	1.49	1.25	2.47	1.68	2.78	1.64	1.93	1.47	0.9	2.17	1.27	1.8	1.17	2.53	1.29	1.03	1.35	3.48	0.84	1.58	1.46	1.44	1.25	1.41	2.38	1.05	1.63	1	0.75	0.96	1.47	1.56
1700001J03Rik	NM_001008547	0.36	0	0.11	0.78	0.42	0	0.11	0.39	0.13	0.31	0.18	0.53	3.33	0.3	0.16	0.18	0.34	0.21	1.75	0	0.32	0.1	0.09	0.13	0.69	0.25	0.2	0.31	0	0.3	0.07	0.79	0.22	0	0	0	0.91	0.48	0	1.08	0.82	0.45	0.57	0.39	0.37	3.62	0.13	0.23
1700001J11Rik	NR_033613	0.26	0.43	0.35	1.35	0.85	0.43	1.06	1.13	0.41	1.38	0.82	0.9	16.79	1.69	0.51	1.75	2.13	0.88	2.49	0.27	0.24	0.42	0	0.31	0.52	0.38	0.22	0.48	0.24	0.04	0.4	1.14	0.64	0.18	0.08	0.36	1.69	0.33	0.57	0.94	1.49	1.11	0.7	0.97	0.52	1.77	0.56	1.5
1700001K19Rik	NM_025488	0.19	1.28	0.27	0	0.8	1.23	0.64	1.4	0.11	2.51	1.09	1.48	9.45	2.01	0.51	1.13	0.83	0.75	1.5	0.49	0.34	0.51	0.34	0.95	1.66	0.3	1.91	0.42	0.84	0.49	0.12	2.32	0.81	0.36	0.46	0.2	2.19	0.76	0.53	0.54	0.66	1.03	0.81	0.16	0.1	0.89	0.73	0.73
1700001K23Rik	NR_036590	0	0.15	0	0	0.14	0.14	0	0	0	0.17	0	0	1.1	0	0	0	0.76	0	0.36	0.2	0	0	0	0	0.29	0	0	0	0	0	0	0	0	0.24	0	0	0	0.2	0	0	0	0.21	0	0	0	0	0	0
1700001L05Rik	NR_027980	0.98	0.82	0.83	0.87	1.8	1.04	1.3	1	1.29	1.28	0.64	1.08	5.12	2.09	0.98	1.11	1.2	0.88	1.59	2.47	3	1.36	2.39	3.04	1.84	2.51	3.14	2.66	2.6	2.03	1.71	2.58	2.47	2.45	3.84	2.33	3.26	2.22	1.67	1.47	1.53	1.4	1.66	2.1	1.33	1.48	1.49	1.75
1700001L19Rik	NM_027035	1.55	0.43	1.25	0.76	0.89	1.25	1.22	1.24	1.22	0.95	1.19	0.97	2.77	0.79	0.72	1.09	0.76	1.48	2.63	1.11	0.93	1.64	0.89	1.35	0.99	0.97	1.65	1.13	0.74	1.17	0.98	0.7	1.05	0.8	0.55	1.46	1.02	1.21	2.93	5.18	3.37	3.31	4.31	3.41	3.88	4.86	4.2	3.44
1700001O22Rik	NM_198000,NR_028486,NR_028487	2.02	3.01	2.07	5.15	2.78	2.81	3.64	5.94	1.69	4.51	2.69	3.86	13.45	4.95	2.49	3.9	5.19	3.55	4.62	1.47	2.18	1.8	2.54	1.97	3.3	1.93	2.12	3.04	2.61	2.21	2.16	3.63	1.77	2.38	2.5	2.54	5.1	2.08	4.36	4.91	3.44	4.1	3.27	2.17	2.9	2.35	2.43	3.94
1700001P01Rik	NM_028156	0.15	0.71	0.85	0.99	1.69	1.54	1.76	0.74	0.51	1.06	0.46	0.67	4.44	0.94	0.6	0.44	0.73	2.37	1.53	1.22	1.08	1.07	0.32	2.15	1.98	2.74	0.47	0.79	0.76	1.66	1.8	2.7	4.41	1.5	1.72	1.53	2.13	2.27	0.33	1.87	0.88	1.05	0.24	2.22	0.47	1.59	0.99	0.86
1700003C15Rik	NR_045478	0	0	0	0	0.09	0	0.25	0	0	0	0.18	0.25	0.51	0.65	0	0.19	0.13	0.11	0.12	0	0	0	0	0	0.19	0	0	0	0	0	0	0	0	0	0	0	0.14	0	0	0	0.15	0.14	0	0	0	0	0	0
1700003D09Rik	NR_045477	0	0.05	0.06	0.43	0.18	0	0.06	0.21	0	0	0.24	0	0.12	0.08	0	0	0	0.06	0.48	0.13	0.29	0.11	0	0.21	0.37	0	0	0.06	0	0.05	0.12	0.07	0	0.08	0	0.33	0	0.06	0.22	0.22	0	0.17	0.03	0	0	0.26	0.07	0.12
1700003E16Rik	NM_027948	2.03	2.35	1.01	1.72	1.93	1.27	1.64	2.53	1.56	3.17	2.26	1.75	17.29	2.65	1.72	3.19	3.75	2.01	3.66	0.67	0.74	0.84	0.97	0.62	1.24	0.58	1.84	0.91	1.08	0.73	0.57	1.41	0.84	0.11	0.35	0.31	2.17	0.89	0.43	1.14	1.78	1.02	1.01	0.63	0.58	1.96	1.28	1.47
1700003F12Rik	NM_029305	0.26	1.19	1.07	1.94	1.77	0.86	0.61	2.38	0.86	3.67	2.4	0.99	9.42	2.68	1.01	2.24	2.68	2.43	2.1	0.77	0.57	1.12	2.27	0.83	1.29	0.54	2.35	0.55	0.32	0.75	0.87	1.97	1.31	0.32	0.21	1.16	2.07	0.89	0.28	1.87	1.18	2.31	0.67	0.83	0.26	2.69	1.39	0.96
1700003G13Rik	NR_040720	0.13	0	0.25	0	0	0	0.13	0.32	0.45	0	0.1	0	0	0.16	0.18	0.19	0	0.23	0	0	0.24	0.23	0	0	0	0	0	0.23	0	0.22	0.08	0.15	0	0	0	0.54	0	0	0	0	0	0.14	0	0.22	0.14	0	0.43	0
1700003G18Rik	NR_029433	0.15	0	0	0	0	0.31	0	0.12	0.34	0	0.23	0.34	0.42	0.38	0	0	0.29	0.27	0	0	0	0.13	0	0.17	0	0.32	0	0	0	0.13	0.38	0.51	0.14	0	0	0	0	0.31	0.17	0.69	0.88	0.81	0	0.74	0	0.4	0.83	0.58
1700003H04Rik	NR_015460	0	0.1	0	0	0	0	0.35	0.2	0.14	0.86	0.28	0	3.26	0.3	0.16	0	0.82	0.11	0.56	0	0.33	0.54	0	0	0.18	0	0.38	0.21	0.15	0	0	0.41	0	0	0	0	0.67	0.37	0.27	0.28	0	0.07	0.32	0.4	0	0.65	0.13	0.23
1700003I22Rik	NR_126075,NR_126076	0.24	0.18	0	0	0.16	0	0.23	0	0	0.2	0.18	0.79	2.15	0	0	0.34	0	0.41	0.43	0	0	0	0	0	0	0	0	0	0	0	0	0.53	0	0	0	0	0.25	0	0	0.26	0	0	0	0	0	0	0.25	0
1700003L19Rik	NR_040507	0	0	0	0	0	0	0	0	0	0	0	0	0.11	0	0	0	0	0	0	0	0	0	0	0	0	0	0	0	0	0	0	0	0	0	0	0	0	0	0	0	0	0	0	0.2	0	0	0	0
1700003M02Rik	NM_027041	1.48	1.35	0.29	0	0.91	0.97	2.22	2.03	0.88	2.4	1.97	1.37	17.85	2.04	1.03	2.14	2.7	1.83	4.3	0.32	0.47	0.37	0.97	0.34	0.97	0.16	0.47	0.46	0.26	0.84	0.32	1.13	0.63	0.13	0.5	0.43	1.75	0.56	0.63	0.95	1.42	1.68	0.77	1.09	0.43	2.22	0.97	1.18
1700003M07Rik	NR_040647,NR_040648	0	0.07	0	0.2	0.22	0	0.04	0.05	0.1	0.08	0.03	0.05	0.04	0.06	0.24	0	0.04	0	0.17	0.18	0.36	0.31	0.13	0.14	0.19	0.08	0.07	0.32	0.59	0.15	0.1	0.13	0.08	0.09	0.14	0.32	0.07	0.13	0.05	0.06	0.05	0.14	0.14	0.07	0	0	0.1	0.23
1700003P14Rik	NR_045982	0	0	0	0	0	0	0	0.07	0	0	0	0	0.08	0	0	0	0	0	0.08	0	0	0	0	0	0.4	0	0	0	0	0	0	0	0	0	0	0	0	0	0	0	0.11	0	0	0	0	0	0	0
1700006A11Rik	NM_027939	0	0.21	0	0	0.06	0.03	0.09	0.04	0	0	0.1	0.05	1.67	0.22	0	0	0	0.12	0.16	0	0	0	0	0	0	0	0	0	0	0	0	0	0	0	0	0	0	0.04	0	0.05	0	0	0	0	0	0	0	0.17
1700006E09Rik	NM_029287	0	0	0	0	0.19	0	0.26	0.11	0.15	0	0.3	0.15	3.07	0.33	0	0.59	0.39	0.23	0.49	0.27	0	0.24	0.96	0.15	0.39	0.14	0.21	0.58	0	0.34	0.08	1.49	0.25	0.17	0	0	0.87	0.13	0.15	0.3	0	0.86	0.14	0.44	0.28	0	0.15	0.25
1700006F04Rik	NR_045621	0	0	0	0	0	0	0	0	0	0	0	0	0.62	0	0	0	0.43	0	0	0	0	0	0	0	0	0	0	0	0	0	0	0.25	0	0	0	0	0	0	0	0.25	0	0	0	0	0	0.29	0	0
1700006H21Rik	NR_045900	0	0	0	0	0	0	0	0	0	0	0.11	0	0.42	0.19	0	0	0	0	0	0	0	0	0	0	0	0	0	0	0	0	0	0	0	0	0	0	0	0	0	0	0	0	0	0	0	0	0	0
1700007B14Rik	NM_001164235,NM_027944	0	0	0.04	0.19	0.09	0.23	0.04	0.1	0	0.42	0.1	0.14	1.06	0.2	0.06	0.19	0.63	0.04	0.16	0.71	0.31	2.33	0.41	1.43	0.12	0.4	3.7	0.69	0.16	0.18	1.68	1.42	0.36	0.93	0.42	0.31	1.09	1.11	3.83	2.78	4.31	3.85	4.52	3.92	10.46	3.83	3.84	4.59
1700007F19Rik	NR_040538	0	0	0	0	0	0	0	0	0.12	0	0	0	0.05	0	0.07	0	0	0.05	0.05	0	0.15	0	0	0.12	0	0	0	0.05	0	0	0.03	0	0	0.14	0.09	0.06	0	0	0.12	0.06	0	0	0	0	0	0	0	0
1700007G11Rik	NM_001024614	0.87	0.42	0.7	5.16	0.67	0.29	0.51	0.7	0.85	0.93	1.7	0.71	5.47	1.32	0.28	1.57	0.92	1.21	1.38	0.22	0.1	0.09	0	0.12	0.31	0.11	0.49	0.28	0.13	0.09	0.07	0.59	0	0.13	0	0	0.12	0	0.12	0.12	0.37	0.34	0.23	0.35	0.11	1.42	0.35	0.4
1700007J10Rik	NR_045476	1.86	1.52	1.9	1	2.24	1.3	1.45	1.78	1.95	1.52	1.3	1.02	2.98	2.32	1.59	1.88	2.15	1.18	2.89	1.1	1.61	0.78	1.73	0.27	0.59	0.74	0.51	1.33	1.63	0.66	0.77	0.23	1.09	0.97	0.44	1.3	0.66	0.73	1.71	0.51	0.32	0.49	1.47	0.97	1.51	0.89	0.78	0
1700007K09Rik	NM_027037	1.55	0.76	0.91	0	0.97	0.94	0.94	1.24	0.94	1.09	0.94	0.92	4.19	1.38	0.37	0.81	1.46	0.6	1.15	13.91	19.09	21.61	18.16	15.03	16.94	15.15	14.75	18.07	17.39	19.32	16.72	12.64	20.84	14.62	21.12	18.85	19.26	12.76	20.38	28.48	29.72	25.68	24.25	25.92	31.62	32.74	22.09	28.34
1700007K13Rik	NM_027040	4.44	2.79	2.92	8.57	2.17	3.11	2.65	4.68	1.82	3.12	3.22	1.66	4.1	3.42	3.8	2.54	2.32	2.5	5.18	2.1	2.47	2.53	4.87	2.14	2.67	1.33	2.83	4.41	2.31	3.99	1.94	4.2	3.02	3.15	2.42	2.81	1.25	2.98	0.63	0.13	1.06	1.11	0.79	0	0	0.61	1.38	1.52
1700007L15Rik	NR_045709	10.5	9.34	8.89	4.08	10.6	8.26	7.67	10.95	6.62	8.49	8.37	7.86	10.71	8.63	7.73	10.43	9.32	8.44	11.77	12.13	10.14	12.6	14.71	12	9.93	9.2	10.73	12.46	11.24	12.41	8.63	10.35	9.8	10.05	12.29	9.99	8.92	7.45	11.62	9.01	8.63	11.87	8.97	11.12	11.4	13.98	11	8.48
1700007P06Rik	NR_040554	0.11	0.09	0	0	0.16	0.08	0.22	0.27	0	0	0	0	0.41	0.56	0	0	0	0.29	0.1	0	0	0.1	0	0.12	0.32	0.12	0	0	0.14	0	0.28	0.12	0.11	0.42	0	0	0	0.34	0	0.38	0.13	0.36	0.24	0.36	0	0	0	0
1700008C04Rik	NR_126468	0.12	0.27	0.11	0	0	0.08	0	0	0.39	0.1	0	0	0.21	0.29	0.46	0	0	0	0.21	0	0	0.1	0	0.13	0	0	0	0.1	0	0.29	0.14	0	0.11	0.29	0	0.12	0.13	0	0.13	0.13	0.27	0	0.18	0	0.12	0	0	0
1700008F21Rik	NM_001168369,NM_029292	0.09	0.07	0.08	0	0.28	0.16	0.33	0.52	0.07	0.31	0.33	0.19	6.1	0.29	0.11	0.56	0.46	0.18	0.84	0	0.16	0.46	0	0.13	0.88	0.06	0.18	0.31	0	0.15	0	0.38	0	0	0.09	0	1.04	0	0.13	0.45	0.38	0.54	0.12	0.28	0.24	1.29	0.38	0.44
1700008I05Rik	NM_027952	0	0.04	0	0	0.04	0.07	0.05	0	0	0.04	0.04	0	1.64	0.31	0	0	0.34	0	0.14	0	0	0.04	0	0.11	0.07	0	0.15	0.04	0	0.47	0	0.27	0.14	0	0	0	0.38	0.2	0.06	0	0.11	0	0.03	0	0.05	0.27	0.05	0.09
1700008J07Rik	NR_024331	3.62	2.8	3.78	4.1	3.17	3.15	3.03	4.28	3.53	3.36	3.08	3.06	4.98	4.23	3.37	3.74	2.66	3.81	5.08	3.69	2.52	2.81	2.17	3.34	2.44	2.87	3.42	3.9	2.96	2.62	2.47	2.88	2.59	3.1	2.98	2.72	3.04	2.32	3.73	4.32	4.64	3.59	4.4	3.63	2.9	3.98	4.76	4.05
1700008K24Rik	NR_038141,NR_038142,NR_038143,NR_038144,NR_038145	0.59	0.45	0.51	0	1.25	0.9	2	1.16	0.54	2.73	1.81	0.45	25.43	1.85	0.36	1.4	1.62	0.74	2.54	0.47	0.24	0.66	0.29	0.15	1.34	0.14	1.18	0.36	1.03	0.46	0.43	1.08	0.36	0.17	0.22	0.42	3.99	0.14	0	1.59	2.01	0.41	0.46	1.25	0.6	1.22	1.05	2.32
1700008O03Rik	NM_027049	0.2	0.32	0.38	0	0.35	0.14	0.29	0.16	0.46	0.18	0.15	0.22	1.84	0.25	0	0.89	0.39	0.44	0.56	0	0.09	0.27	0	0.22	0	0	0.46	0.18	0.25	0	0.13	0.33	0	0.13	0	0	0.22	0.3	0.11	0.23	0.58	0.27	0.11	0	0.1	0	0.11	0
1700008P02Rik	NM_027048	0.12	0	0	0	0.16	0.08	0	0	0	0	0.09	0.13	1.72	0	0	0	0	0.1	0.11	0	0	0.21	0	0.13	0	0.25	0	0.2	0.29	0.1	0	0.78	0.33	0	0	0	0.13	0	0	0.13	0.14	0	0	0	0	0	0	0.44
1700009C05Rik	NR_046040	0	0	0	0	0	0	0	0	0	0	0	0	0.11	0.15	0	0	0	0.1	0	0.12	0	0	0	0	0	0	0	0	0	0.2	0	0	0	0	0	0	0	0.12	0.13	0	0	0	0	0	0	0	0	0
1700009J07Rik	NR_015547	0.41	0.55	0.47	2.64	1.61	0.74	0.96	0.9	0.91	2.19	1.14	1.22	7.79	1.36	0.66	0.89	0.77	0.7	2.58	2.15	1.71	1.85	0.65	1.76	1.74	1.16	2.31	1.23	0.63	2.38	1	1.88	0.66	2	1.46	0.72	1.85	1.69	1.43	0.91	1.5	1.72	0.95	1.14	1.36	2.79	1.64	0.38
1700009N14Rik	NM_001081095	0.36	0.95	0.94	2.99	2.45	1.49	1.91	2.09	0.32	2.75	2.11	2.04	22.39	2.02	1.42	4.1	3.02	1.73	4.47	1.83	2.18	2.95	2.98	1.25	4.93	1.11	6.44	3.2	1.34	3.87	1.16	3.99	1.26	0.18	1.38	1.61	3.89	1.06	0.79	2.28	4.51	1.34	1.51	1.27	1.34	2	1.25	1.62
1700010B08Rik	NM_029308	0.31	0.08	0	1.12	0.43	0.62	0.49	0.58	0.35	1.7	0.77	0.34	12.73	0.76	0.54	2.56	2.95	0.98	1.79	0	0.09	0.18	0	0.11	0.89	0.11	0.79	0.09	0.13	0.17	0.13	0.57	0.48	0	0.33	0.1	1.56	0.1	0.34	0.7	0.12	1.04	0.27	0.5	0.11	0.81	0.11	0.58
1700010D01Rik	NM_029590	0.2	0.9	0.18	2.5	0.4	0.76	1.5	1.47	0.22	0.72	0.82	0	6.56	1.2	0	1.06	1.25	1.18	0.89	0.39	0.34	0.34	1.25	0.63	1.97	0	1.05	0.26	0.24	0.64	1.32	1.65	0.36	0.47	0.31	0.19	2.55	0.93	0.21	0.43	0.45	0.41	0.4	0.85	0	0	0.21	0.98
1700010I02Rik	NR_040587	0.42	2.38	0.22	0	0	0.19	0.31	1.11	0	0	0.38	0.26	0	0.22	1.07	1.56	0	0	0.23	0	0.66	0	0	0	0.8	0.29	0	0	0.89	0	1.44	0.87	1.65	0.2	0	0.26	1.87	1.49	0	0	0	0	0.13	0	0	0	0.29	0
1700010I14Rik	NM_025851	2.65	3.09	2.71	3.87	2.48	2.59	2.83	3.5	2.73	3.6	2.47	2.8	25.55	4.82	3.2	4.74	5.06	3.63	4.97	2.38	2.94	2.66	2.39	3.99	2.17	2.93	2.66	2.08	3.26	3.13	2.49	4.33	3.6	2.67	3.12	2.57	3.55	3.26	3.66	4	3.62	4.12	3.24	5.11	4.28	4.04	4.09	3.94
1700010J16Rik	NR_040579	0	0	0	0	0	0	0	0	0	0.18	0	0	0.28	0	0	0	0	0	0.1	0	0	0	0	0	0	0	0	0	0.13	0	0	0	0	0	0	0	0	0.1	0	0	0	0	0	0	0	0	0	0.2
1700010K23Rik	NR_040512	0	0.41	0	0	0.37	0.19	0	0.44	0.3	0.7	0.4	0	4.95	1.01	0	0	0.51	0	0.73	0.53	0	0.94	0	1.17	0.79	0.38	0	0.3	0.33	0.56	0.67	0.31	0.77	0.47	0.44	0	0.58	0	0.29	1.35	1.26	0.43	0.43	0	1.01	2.43	0	0
1700011A15Rik	NM_025487	0.1	0.24	0.19	0	0.28	0.55	0.29	0.17	0	0.71	0.38	0.56	2.88	0	0.27	0	0.68	0.97	0.19	0	0	0.54	0.22	0.11	0.44	0.53	0	0.35	0.25	0.6	0.25	0.78	1.14	0	0.33	0	0.55	0.61	0.45	0.69	0.82	0.38	0.54	0.33	0.11	0.81	0.44	0.58
1700011B04Rik	NR_045616	0.74	0.68	0.55	0.32	0.51	0.3	0.56	0.59	0.49	0.38	0.44	0.65	1.07	0.72	0.77	1.28	0.7	0.38	1.07	0.29	0	0.13	0.1	0	0.21	0	0.22	0	0.36	0.37	0.09	0.32	0.27	0.18	0.24	0	0.16	0.15	0.48	0.16	0.67	0.23	0.38	0.94	0.76	0.77	1.27	0
1700011C11Rik	NR_126462	0	0	0	0	0	0	0	0	0	0	0	0	0	0	0	0	0	0	0	0	0	0	0	0	0	0	0	0	0	0	0	0	0	0	0	0	0	0	0	0	0	0	0	0	0	0	0	0
1700011E24Rik	NM_029298	0.11	0.34	0.31	1.43	0.91	0.66	0.84	1.24	0.25	0.86	1.4	0.6	15.42	1.35	0.43	1.76	2.09	0.66	3.5	0.55	0	0.67	0.16	0.36	0.16	0	0.33	1.14	0.14	0.28	0.34	0.72	0.92	0.54	0.18	0.78	1.54	0.65	0.84	1.36	1.13	1.69	0.86	0.71	0.79	2.16	1.43	0.82
1700011H14Rik	NM_025956	26.82	13.81	17.97	11.61	7.96	12.6	10	20.44	14.38	8.27	12.79	12.38	16.75	4.39	6.98	7.76	7.46	16.75	31.52	32.55	33.62	49.23	31.28	33.8	20.43	24.22	67.54	25.75	29.27	30.33	35.92	26.55	27.82	41.18	34.14	29.4	19.73	38.3	136.34	130.67	126.19	124.11	141.38	141.03	158.54	129.9	135.65	132.71
1700011I03Rik	NM_029290	0.1	0.37	0	0.62	0.99	0.19	0.18	0.46	0.11	0.5	0.43	0.1	5.61	1.05	0.25	0.97	0.82	0.49	0.61	0	0.25	0.17	0	0.1	0.55	0	1.74	0.17	0.12	0.24	0.18	0.52	0.09	0.24	0	0	0.31	0.19	0.1	0.11	1.09	0.41	0.5	0.46	0.2	0.63	0.1	0
1700011L22Rik	NM_026315	0	0.07	0	0	0.33	0.31	0.27	0.08	0.11	0.57	0.28	0.31	4.09	0.81	0	0.41	0.54	0.32	0.77	0.1	0.08	0.16	0	0	0.13	0.1	0.43	0.33	0.23	0.16	0.06	1.03	0.17	0.12	0	0.29	0.3	0.09	0.21	0.32	0.64	0.4	0.1	0	0.1	0.12	0	0
1700011M02Rik	NR_073044	0.48	0.91	0.22	0	0.16	0.33	0.9	0.56	0	0.41	0	0.8	1.49	0.3	0	0.34	0	0.42	0.43	0	0	0	0	0	0	0.26	0	0	0	0	0	0	0	0	0	0	0	0	0.26	1.31	0	0	0.73	0.77	0	0.61	0.26	0.45
1700012A03Rik	NM_029587	1.32	1.8	2.35	5.5	2.73	3.99	3.08	4	1.13	5.08	4.09	2.77	11.26	5.57	2.12	3.39	3.18	2.95	10.87	2.96	4.4	7.41	3.38	2.63	5.65	0.95	10.6	5.69	4.02	8.48	2.07	2.87	1.69	0.12	5.18	1.02	6.86	3.58	2.54	4.66	10.39	7.85	4.65	5.2	3.23	8.24	5.58	5.31
1700012B07Rik	NM_001162428,NM_027038	0	0.23	0.27	0	0.2	0.26	0.41	0.56	0.11	0.6	0.07	0.32	4.2	0.48	0	0.57	0.56	0.51	1.88	0.07	0.09	0	0.32	0	0.88	0.13	0.3	0.09	0.08	0.16	0.04	0.97	0.15	0	0.1	0.07	0.85	0.39	0.11	0.97	0.7	0.21	0.07	0.47	0	0.52	0.43	0.61
1700012B09Rik	NM_029306	1.94	0.43	1.16	0	0.86	0.28	0.53	2.34	1.55	2.15	1.76	1.52	5.64	1.19	0.9	1.21	1.18	1.9	3.89	0	0	0.24	0	0.15	0.2	0.14	0	0	0	0.23	0.09	0.61	0.26	0	0	0	0.89	0	0.45	0.46	0.95	0.07	0.72	0.44	0	0.18	0	1.55
1700012D01Rik	NR_045171	5.33	5.36	5.56	5	4.23	4.66	4.41	5.92	4.72	4.59	4.78	4.33	8.38	6.84	4.8	3.95	4.78	3.51	7.78	8.05	6.62	7.46	8.19	6.04	4.11	5.85	4.35	10.41	8.77	6.02	6.56	4.04	5.94	6.68	5.23	5.19	7.3	3.36	6.2	4.1	4.05	3.46	5.23	3.28	4.62	4.62	5.29	1.78
1700012D14Rik	NR_015573	0.91	0.12	0.7	0	0.94	1.02	1.02	1.34	1.02	1.05	0.57	1	1.1	1.12	1.58	1.54	1.01	0.91	2.2	1.21	0.54	0.66	2.04	0.49	0.22	0.64	1.39	0.78	0.38	0.76	1.12	0.5	0.71	0.93	0.24	1.06	0.81	0.9	1.15	1.69	1.22	1.85	1.02	0.98	0.47	0.4	1.31	1.7
1700012D16Rik	NR_126464	0	0	0	0	0.11	0	0	0	0	0.43	0.12	0	1.06	0	0	0.72	0	0	0.15	0	0.29	0	0	0.18	0.72	0.18	0.25	0	0	0	0.21	0	0	0	0	0	0	0	0	0.18	0	0	0	0	0	1.08	0	0.31
1700012I11Rik	NR_045140	0	0	0	0	0	0	0	0	0	0	0	0	0	0	0	0	0	0	0	0.09	0.31	0.08	0	0.29	0	0.18	0.4	0.23	0.22	0.3	0.11	0.29	0.33	0.11	0.57	0.18	0.29	0.17	0.48	1.2	0.6	0.09	0.65	0.71	1.28	2.44	0.86	0.66
1700012L04Rik	NM_029588	1.11	0.73	0.77	0	1.24	0	0	0.47	0.93	0.8	0	1.07	0	1.56	0	0	1.45	1.19	1.01	0	1.14	0.78	0	0.4	1.41	1.12	1.55	0.47	0	1.15	0.91	2.05	0.92	2.03	0	2.59	0	0	0.2	1.38	0.56	1.08	0	0	0.76	0	0.51	1.01
1700012P22Rik	NM_027056	0.76	0.15	0	0.83	0.2	0.38	0.36	0.99	0.32	0.33	0.64	0.31	2.49	0.58	0.12	0	0.72	0.65	1.47	0	0	0	0	0	0	0	0	0.08	0	0	0	0.31	0	0.12	0	0	0.31	0.09	0.1	0.11	0.11	0.05	0.2	0	0.1	0.25	0.1	0
1700013D24Rik	NM_001177502	0	0.14	0	0	0.13	0.12	0.17	0	0	0.31	0.27	0.2	1.32	0.22	0	0	0.34	0.31	0	0.18	0	0	0	0	0.53	0	0	0	0	0	0	0	0	0.44	0	0	0.58	0.18	0.59	0.6	0.84	1.15	0.19	0.59	0	0.47	0.39	1.02
1700013F07Rik	NM_029314	1.3	0.37	0.3	0	0.89	0.87	0.93	0.78	0.73	3.79	1.09	0.89	8.1	1.79	0.42	1.41	0.92	0.42	2.06	0.32	0.29	0.42	0	0.35	1.17	0.34	0	0.42	0.4	0.68	0	1.07	1.06	0.2	0	0	2.61	0.16	0	0.54	1.3	1.97	0.59	1.04	0.67	0.42	0.35	1.52
1700013G24Rik	NM_027063	0.36	0.28	0.16	1.93	0.8	0.41	0.42	1.14	0.3	2	0.93	1.16	12.99	0.87	0.58	2.07	2.62	1.29	1.62	0.36	0.79	0.77	0.13	0.87	1.14	0.28	2.02	0.77	0.11	1.19	0.38	1.93	0.74	0.11	0.99	0.72	2.1	0.87	0.29	1.1	1.92	0.38	0.6	1.14	0.18	1.87	0.19	1
1700013H16Rik	NM_001200013	0	0.06	0	0	0	0	0.07	0.06	0	0	0	0	0.81	0.18	0	0.22	0	0	0.07	0	0	0	0	0	0.11	0	0	0	0	0	0.05	0	0	0	0	0	0	0	0	0.08	0.34	0	0.08	0	0.08	0.1	0	0.14
1700015E13Rik	NM_001039593	0	0	0.12	0	0	0.18	0.13	0.32	0.15	0	0.3	0	2.76	0	0	0.77	0.88	0.57	1.32	0.13	0.12	0	0	0	0.76	0.14	0	0.11	0	0	0	1.16	0.25	0.16	0	0.13	0.28	0.39	0	0.44	1.36	0.84	0.07	0	0.41	0.69	0.43	0.74
1700015F17Rik	NM_001200025	0	0.82	0	3.16	0.37	0.18	0.13	0.43	0.3	2.07	0.3	0.73	3.61	0.33	0.87	0.39	0.76	0.23	1.81	0	0.12	0.23	0	0	0.38	0.14	0.41	0.11	0	0	0	1.61	0.49	0.33	0	0.27	0.43	0.26	0.29	0	1.22	1.34	0.21	0.21	0.41	1.22	0.14	0.5
1700015G11Rik	NM_001195601	0.78	1.19	0.49	1.11	0.9	2.15	1.52	3.79	1.17	3.16	2.13	2.62	28.64	1.62	0.68	2.26	4.19	1.14	4.24	2.83	1.14	5	1.83	1.69	4.2	1.42	7.68	1.76	2.91	2.81	1.93	2.94	0.49	0.95	4.22	0.77	8.35	4.47	1.68	0.29	1.22	0.55	1.47	0.85	0	4.69	2.8	1.95
1700016C15Rik	NM_027077	0	0.39	0.12	0	0.26	0.34	0.12	0.2	0.14	0.43	0.28	0.28	2.61	1.08	0	0.36	0.95	0.54	0.11	0	0.11	0.11	0	0	1.08	0.13	0.38	0.22	0.16	0.1	0.08	0.28	0.23	0.15	0	0	0.27	0.25	0.14	0.14	0.14	0	0	0.2	0.26	0.33	0.14	0
1700016D06Rik	NM_024271	0.07	0.18	0.22	0	0.15	0.1	0.14	0.21	0	0	0	0.16	1.58	0.18	0	0.26	0.48	0.42	0.46	0	0.06	0.13	0.05	0.23	0.15	0.07	0.12	0.13	0	0.06	0.04	0.39	0.34	0.45	0	0.07	0.69	0.14	0.23	0.42	0.71	0.32	0.12	0.12	0.15	0.09	0.39	0.13
1700016G22Rik	NR_045891	0.16	0	0.15	0	0.22	0.22	0.77	0.91	0.91	0.14	0.24	0.36	1.18	0.2	0	0.23	0	0	0.59	0.48	1.43	0.7	0.69	0.88	2.33	8.54	1.98	0.28	0.6	1.08	1.2	3.57	7.53	0	0.26	0.65	1.39	1.77	1.05	1.44	0.19	0.09	0.42	0	1	0.42	0.35	0.91
1700016H13Rik	NM_001163550,NM_028824	1.44	1.01	0.66	2.79	1.64	1.44	1.25	1.44	0.67	0.82	1.33	1.43	11.63	3.2	0.16	2.39	1.36	1.64	4.22	0.6	0.63	1.45	1.35	1.55	2.73	0.72	2.89	1.74	1.33	2.78	0.92	2.25	1.1	0.44	0.95	0.6	2.3	1.41	0.78	1.6	3.13	1.58	1.05	1.72	0.86	2.25	0.71	0.67
1700016K19Rik	NM_198637	2.23	1.25	0.93	4.15	1.04	1.54	2.48	3.4	1.13	1.04	1.88	1.32	8.55	1.23	1.32	2.78	2.2	1.9	4.39	0.3	0	0.53	0	0	1.01	0	0.92	0.43	0	0.59	0	0.55	0.47	0	0	0.3	1.19	0.49	0.22	0.68	0.57	0.53	0.53	0.48	0.21	0.13	0.65	0.56
1700016L04Rik	NR_045824	0	0.24	0	0	0	0	0.1	0	0	0	0.08	0	0.18	0	0	0.15	0	0	0.09	0	0	0	0	0	0	0	0	0	0	0.09	0.13	0	0	0	0	0	0.22	0.1	0	0	0	0	0	0	0	0	0	0
1700016L21Rik	NR_040460	0	0	0	0	0	0	0	0	0	0	0	0	0	0	0	0	0	0	0	0	0	0	0	0	0	0	0	0	0	0	0	0	0	0	0	0	0	0	0	0	0	0	0	0	0.26	0	0	0
1700016P04Rik	NR_038149	0.47	0.53	0.65	1.98	0.16	0.48	0.23	1.13	0.26	0.8	0.17	0.78	11.25	0.58	0	0.67	3.08	1.21	3.15	0.69	0.41	1.01	0	0.5	3.73	0.5	1.79	0.2	0	0.97	0	1.3	0.65	0	0.37	0.23	2.98	0	0	0	0.81	0.98	0.12	0.75	0.48	0.9	0.75	1.31
1700017B05Rik	NM_028820	11.59	8.57	10.12	6.91	9.87	10.84	13.2	4.38	11.43	9.58	6.84	11.97	13.76	5.45	8.88	8.58	7.01	14.02	4.61	17.03	13.51	14.28	14.39	23.35	15.69	24.75	11.07	14.3	16.27	11.86	19.44	30.07	26.12	19.91	15.53	14.05	18.01	23.51	34.8	22.41	20.3	23.46	28.07	26.45	21.24	19.32	28.51	24.87
1700017D01Rik	NM_027058	0	0.12	0.14	1.67	0.69	0.61	0.58	0.8	0.09	1.12	0.8	0.42	11.18	1.12	0.1	0.78	1.24	0.65	2.02	0.08	0.14	0.2	0	0.08	0.33	0.08	0.93	0.2	0.09	0.13	0.05	0.58	0.21	0	0	0	0.66	0.37	0.17	0.26	0.78	1.26	0.24	0	0.08	0.6	0.66	1.72
1700017G19Rik	NR_040445	0.04	0.03	0.03	0	0.05	0.1	0.03	0	0	0.06	0.11	0	1.22	0	0	0	0	0.03	0.17	0	0	0	0	0	0.05	0	0.05	0	0	0	0	0.16	0.03	0	0	0	0	0	0	0.08	0	0	0	0	0	0	0	0.21
1700017J07Rik	NR_040326	0	0	0	0	0	0	0	0	0	0	0.16	0	0	0	0	0	0.39	0.18	0.38	0	0	0	0	0	0.3	0	0	0.18	0	0	0	0.23	0	0	0	0	0	0	0	0	0	0	0	0	0	0	0	0
1700017N19Rik	NM_001081246	0.11	0.12	0.15	0	0.33	0.25	0.1	0.47	0.06	0.51	0.28	0.35	4.17	0.26	0.14	0.47	0.61	0.23	0.58	0.05	0.05	0.32	0.19	0	0.61	0.11	0.64	0.05	0.07	0.13	0.03	0.52	0.15	0	0	0.27	0.57	0.42	0.06	0.48	0.9	0.23	0.06	0.43	0.33	0.14	0.23	0.4
1700018A04Rik	NR_029439	0.4	0	0	0	0	0	0	0.43	0.15	0.11	0.1	0.43	0.84	0.16	0	0	0	0	0.24	0	0.12	0	0	0	0	0	0	0	0	0	0	0.44	0	0	0	0	0	0	0.14	0	0	0	0	0	0	0	0.14	0
1700018B08Rik	NM_029597	0.09	0.33	0	0.92	0.41	0.11	0.24	0.14	0.19	0.81	0.13	0.37	5.37	0.41	0	0.99	0.49	0.58	0.85	0.09	0.15	0.22	0	0.09	0.36	0.18	0.26	0	0.11	0.21	0.05	0.55	0.31	0	0.14	0	0.46	0.25	0.09	0.1	0.77	0.18	0	0.41	0.17	0	0.28	0
1700018B24Rik	NR_003617	0.05	0.08	0.05	0.06	0.15	0.07	0.02	0.08	0.03	0.3	0.1	0	2.15	0.19	0.07	0.38	0.28	0.11	0.19	0.05	0.02	0.07	0	0.03	0.11	0	0.04	0.07	0.07	0.02	0.03	0.11	0.07	0.03	0.13	0	0.28	0.05	0.06	0.24	0.06	0.11	0.03	0.08	0.08	0.21	0.09	0
1700018C11Rik	NM_029324	0.14	0.65	0.26	0	0.59	0.38	0.54	0.91	0	1.1	0.63	0.78	7.69	0.17	0.18	1.03	1.48	1.1	2.31	0.42	0.25	0.25	1.3	0.46	1.22	0	1.08	0.36	0.53	0.35	0.44	0.78	0.26	0.17	0	0.28	0.45	0.42	0	1.1	0.65	0.82	0.29	0.23	0.15	0.37	0.61	1.06
1700018F24Rik	NM_027069	0.08	0	0	0	0.2	0.14	0.85	0.2	0.09	0.67	0.31	0	5.85	0.48	0.11	0	0.68	0.42	0.45	0	0	0.07	0.17	0	0.18	0	0	0	0	0	0.15	0.16	0.23	0	0	0	0.62	0	0.18	0.09	0.6	0.11	0.26	0.66	0.17	0.62	0	0
1700018G05Rik	NR_045422	44.2	48.98	49.62	36.52	24.36	44.94	35.34	44.66	35.91	37.35	43.55	38.02	38.11	17.55	11.81	33.62	27.43	36.1	59.08	0	0	0.22	0	0	0.74	0.82	0.39	0	0	0	0	0	0	0.61	0.41	0	0.27	0	1.9	1.66	2.65	0.93	3.1	0.82	0.52	0.65	3.8	1.42
1700018L02Rik	NR_028360	4.39	3.6	4.03	2.49	3.78	2.98	2.93	5.81	3.77	4.01	3.4	4.16	6.28	3.86	2.73	4.83	5.46	3.64	3.58	4.37	4.95	3.11	4.03	3.84	3.13	2.49	4.25	5.83	3.5	4.08	3.9	2.18	2.73	4.94	3.42	3.67	3.68	3.69	3.2	3.07	3.64	4.07	3.26	2.36	2.67	3.64	4.08	2.76
1700019A02Rik	NM_027070	0.15	0.23	0.14	0	0.21	0.51	0.15	0.25	0	1.58	0.45	0	12.7	1.31	0	0.44	1.16	0.79	2.9	8.38	8.47	23.99	12.16	10.22	7.24	7.05	29.29	7.57	6.6	10.8	11.28	8.89	10.33	16.03	7.32	6.25	5.88	12.37	48.98	46.97	36.5	50.63	48.61	49.96	54.39	57.49	50.39	37.04
1700019B03Rik	NM_029598	0.23	0.13	0.1	0	0.12	0.44	0.47	0.32	0.06	0.19	0.08	0.12	1.06	0.34	0.22	0.16	0.05	0.14	0.15	0	0.15	0.15	0	0.3	0.16	0.52	0.25	0.15	0.14	0.09	0.21	0.06	0.51	0.21	0	0.11	0.36	0	0.37	0.25	0.38	0.12	0.29	0.18	0.17	0	0.24	0.31
1700019B21Rik	NR_045442,NR_045443	0.65	0.75	1.2	0	0.22	0.44	0.31	0.52	0.9	0.56	0.36	0.28	1.91	0.99	1.05	0.47	1.07	0.7	0.88	0	0	0	0	0	0.23	0	0	0.14	0.2	0.27	0.1	0	0.15	0	0.26	0	0	0	0	0.72	0	0.68	0.17	0.26	0.17	0.21	0.35	0.3
1700019C18Rik	NR_126478	0	0	0	0	0	0.17	0	0	0.27	0	0.36	0	0.45	0.3	0	0	0	0	0.66	0	0	0	0	0.26	0	0	0.38	0	0	0	0	0	0	0	0	0	0.52	0	0	0	0.85	0	0	0	0	0.63	0	0.46
1700019D03Rik	NM_144953	1.24	2.51	1.25	1.21	4.02	2.62	1.7	1.89	2.63	1.84	2.01	3.06	13.45	2.74	2.49	3.09	2.13	3.36	3.25	5.51	6.74	3.99	6.58	9.09	1.6	3.72	7.47	6.17	7.35	3.55	7.88	7.21	5.18	6.61	8.05	3.83	11.65	9.47	20.18	15.42	13.27	13.4	14.98	16.14	9.78	11.42	17.63	15.28
1700019E08Rik	NR_040497	0	0	0	0	0	0	0	0	0	0	0	0	0	0	0	0	0	0	0	0	0	0	0	0	0	0	0	0	0	0	0	0	0	0	0	0	0	0	0	0	0	0	0	0	0	0	0	0
1700019G17Rik	NM_001145895,NM_029331	2.56	3.2	1.91	2.34	2.62	2.04	2.91	3.85	3.57	1.87	2.06	2.62	4.19	3.78	3.02	2.91	2.4	2.82	2.74	1.98	1.93	1.28	2.67	1.94	1.01	1.94	3.05	2.04	1.69	1.52	2.02	2.25	1.93	2.22	2.15	2.43	2.06	1.2	1.55	1.09	0.91	0.89	1.31	2.55	0.65	1.22	1.47	2.17
1700019G24Rik	NR_040255	0.38	0.15	0.53	0	0.78	0.26	0.18	1.07	0.21	0.65	0.7	0.42	6.88	0.23	0.25	1.92	1.79	0.16	0.69	0	0	0.33	0	0	0.55	0	0.58	0	0	0.32	0.12	0	0.18	0	0	0	0.2	0	0	0	0.44	0	0.29	0.31	0.39	0.98	0.81	0.71
1700019L03Rik	NM_025619	1.16	0.47	0.4	0.94	0.86	0.51	0.96	1.38	0.42	1.08	0.45	0.41	2.29	1.18	1.02	0.4	0.42	0.47	1.66	0.11	0.05	0.33	0	0.12	0.08	0.06	0.43	0.33	0.22	0.27	0.17	0.79	0.2	0.22	0.09	0.27	0.71	0.44	0.49	0.49	0.75	0.69	0.58	0.6	0.84	0.85	0.99	0.64
1700019M22Rik	NR_103800	0.48	0.12	0.15	2.06	0.88	0.32	0.61	2.95	0	1.24	0.83	0.53	11.12	3.52	0.42	1.62	1.21	1.37	3.32	0.32	1.12	0.97	0.45	0.17	2.29	0.84	1.7	0.95	1.58	1.33	0.2	2.11	1.78	0	0.51	1.12	4.78	1.42	0.69	1.06	1.28	0.84	0.25	1.79	0.33	3.31	0.51	1.49
1700019N19Rik	NM_026208	0.1	0.23	0	1.31	0.35	0.33	0.38	0.24	0.22	1.56	0.38	0.33	7.62	1.59	0.13	1.31	1.15	0.86	1.1	0.1	0.27	0.17	0	0	0.57	0	1.07	0.26	0.5	0.34	0	0.88	0.56	0	0	0.2	2.91	0.79	0.33	0.9	0.8	1.12	0.26	0.48	0.31	1.32	0.76	0.56
1700019O17Rik	NM_027966	0	0	0.05	1.03	0.29	0.21	0.3	0.13	0.12	0.32	0.04	0.17	2.68	0.19	0.07	0	0.15	0.18	0.1	0.05	0	0	0	0.06	0.37	0.05	0	0.09	0.06	0.13	0.06	0.34	0.05	0	0.25	0.05	0.17	0.1	0	0.18	0.18	0	0.11	0	0	0.35	0.23	0.1
1700020A23Rik	NM_001163483,NM_029375	0	0.1	0.38	0	0.38	0.27	0.39	0.9	0	1.12	0.14	0.2	3.81	0.99	0	1.49	1.23	0.81	1.19	0	0	0.12	1.44	0.44	1.34	0.7	0.41	0.94	0.33	0.34	0.11	1.24	0.35	0	0.22	0.74	0.4	0.37	0.6	0.6	0.43	0.57	0.14	0.3	0.14	0	0.8	0.35
1700020D05Rik	NM_023781	0.45	0.56	0.42	0.2	2.19	1.5	1.54	1.31	1.01	1.8	1.42	1.48	14.53	2.32	0.83	1.05	2.75	1.47	2.3	0.64	0.4	1.02	0.71	1.18	0.26	1.5	1.1	0.86	0.9	0.61	1.45	2.56	2.5	0.22	0.14	0.64	2.14	0.8	0.59	1.12	1.03	0.96	0.66	1.74	0.46	0.95	0.78	0.34
1700020D14Rik	NR_126545,NR_126545_chrY:321657_323296	0	0	0	0	0	0.11	0	0.13	0	0.14	0	0.35	1.3	0.39	0	0.46	0	0.41	0	0	0.14	0.28	0	0	0	0	0	0.14	0	0	0	0	0	0	0	0	0.68	0	0	0	0	0.42	0	0	0	0	0	0
1700020G17Rik	NR_045979	0	0	0	0	0.22	0.21	0	0	0	0	0	0.17	0.28	0.19	0	0.91	0	0	0	0	0	0	0	0	0.23	0	0	0	0	0	0	0.35	0.15	0.19	0.25	0.16	0	0	0	0	0.18	0	0.08	0	0	0.2	0	0
1700020I14Rik	NR_015473,NR_027832	12.96	12.91	9	6.37	11.3	9.67	13.4	8.9	14.74	8.39	11.42	15.12	10.35	15.72	12.34	10.5	7.85	14.66	13.46	18.75	17.04	8.68	11.69	21.67	9.75	19.84	17.89	13.06	16.75	10.47	18.34	23.01	16.63	16.58	23.4	14.54	20.01	25.83	24.74	22.31	14.46	16.27	17.43	24.84	15.96	16.94	22.33	25.18
1700020L24Rik	NM_025492	0.6	2	0.55	1.3	0.96	0.4	1.04	0.56	1.45	2.84	0.82	0.65	3.06	2.43	1.04	2.03	1.04	0.43	0.99	4.81	6.17	3.2	3.88	4.2	4.55	5.57	2.56	4.04	8.14	7.16	4.74	5.42	7.54	4.78	6.83	5.42	7.38	3.52	0.97	1.23	0.68	1.85	0.78	1.43	0.61	1.3	0.64	1.3
1700020M21Rik	NR_040742	0	0	0	0	0	0	0	0	0	0	0	0	0	0	0	0	0	0	0	0	0	0	0	0	0.21	0.16	0	0	0	0	0	0	0	0	0	0	0	0	0	0	0	0	0	0	0	0	0	0
1700020N01Rik	NR_027968	0	0.13	0	0	0.12	0	0.16	0.21	0	0	0.19	0.09	3.52	0.74	0.23	0.25	0.08	0.15	0.24	0.79	0.46	0.6	0.18	0.56	0.74	0.54	0.26	0.6	0.97	0.87	0.8	0.66	0.56	0.53	0.28	0.61	0.84	0.34	0.19	0.58	0.1	0.51	0.23	0.42	0.27	1.02	0.28	0
1700020N15Rik	NM_029316	0	0	0	1.52	0.37	0	0.17	0	0	0	0.53	0.59	1.94	0.44	0	0.64	0	0	0.64	0.71	0.16	0.93	0	0	1.28	0	0.34	0	0.44	0	0.36	0	0	0	0	0.18	2.85	0	0	0.39	1.63	0.28	0	0.29	0	0	0	0
1700020N18Rik	NR_026924	0	0	0.33	0	0.12	0	0	0	0.2	0.15	0	0.39	2.57	0.44	0	0.77	0.5	0	0.32	0	0	0	0	0	0	0	0	0	0	0.15	0.11	0	0	0	0	0.18	0	0.18	0.19	0	0	0.65	0.37	0.29	0	0.69	0.76	0
1700021F05Rik	NM_026411	17.15	15.85	15.16	12.78	17.28	16.48	16.28	16.39	14.34	16.35	16.7	16.6	17.19	18.57	12.45	14.59	17.49	14.35	18.32	19.26	20.25	21.77	17.17	14.56	20.69	17.8	19.76	20.44	21.54	21.96	17.7	17.25	16.63	20.63	15.36	21.77	15.33	19.71	12.59	18.79	12.01	14.53	16.66	15.9	15.74	19.65	16.41	17.21
1700021F07Rik	NM_028158	0	0	0.14	0	0.1	0.2	0.14	0.48	0	1.67	0.44	0.16	3.37	0	0.58	0	0.85	0	0.81	0.15	0	0.39	0.32	0	0.43	0	0.23	0	0	0	0	0.16	0.28	0	0	0.15	0	0.15	0.16	0.17	0.34	1.26	0.54	0.24	0	0.39	0.48	0.56
1700021K19Rik	NM_001200038,NM_172615	6.37	5.65	5.95	5.41	7.62	6.49	9.23	6.64	8.52	5.36	4.73	7.13	8.37	7.83	6.95	5.78	5.25	7.51	7.18	12.53	15.44	8.79	14.99	16.79	6.27	17.12	19.72	10.65	14.93	12.28	14.46	17.62	16.53	13.58	20.21	12.15	19.07	15.85	18.8	15.6	10.35	14.4	13.14	19.32	10.9	14.43	13.6	17.14
1700021N21Rik	NR_045800	0.41	0.16	0	0	0.14	0.21	0.19	0.08	0.11	0.27	0.31	0	0.46	0.25	0	0	0.1	0.35	0.47	0.31	0.18	0	0	0	0.29	0	0	0.09	0.13	0	0	0	0	0	0	0	0	0.1	0	0	0	0	0.11	0	0.11	0	0.11	0.19
1700022A21Rik	NR_003953	0.19	0.1	0.06	1.37	0.52	0.21	0.18	0.2	0.28	1.35	0.33	0.27	5.02	0.61	0.08	0.46	0.48	0.27	0.46	3.36	3.17	3.1	1.69	1.83	2.67	2.69	3.12	4.35	3.26	2.52	2.98	2.3	2.82	2.17	2.89	2.54	3.71	1.77	2.19	3.46	3.62	2.53	2.53	1.6	2.12	1.4	1.76	2.34
1700022A22Rik	NR_045509	0.11	0	0	0	0	0	0.1	0.09	0	0.28	0.08	0	0.39	0	0	0	0.1	0	0.1	0.22	0	0	0	0	0	0	0	0	0	0	0	0	0	0	0	0	0	0.11	0	0	0.12	0	0	0	0	0	0	0
1700022E09Rik	NR_040568	0	0	0	0	0	0	0	0	0	0	0	0	0	0	0	0	0	0	0	0	0	0	0	0	0	0	0	0	0	0	0	0	0	0	0	0	0	0	0	0	0	0	0	0	0	0	0	0
1700022H01Rik	NR_126477	0.14	0.53	0.51	2.69	0.48	0.19	0.53	0.67	0.46	0.72	0.72	0.76	1.76	0.17	0.18	1.01	0.66	0.24	0.5	0.14	0.12	0.48	0.49	0.15	0.2	0.44	0.63	0.36	0.69	0.12	0.26	0.61	0.26	0.68	0	0.69	0.45	0.41	0.45	0.77	1.27	1.32	0.36	0.67	0.86	1.81	0.75	0.78
1700022H16Rik	NR_045488	0	0	0	0	0	0	0	0	0	0	0	0	0	0	0	0	0	0	0	0	0	0	0	0	0	0	0	0	0	0	0	0	0	0	0	0	0	0	0	0	0	0	0	0	0	0	0	0
1700022I11Rik	NM_026088	0.05	0.02	0	0	0.02	0.08	0.07	0.15	0	0.04	0.09	0.1	0.51	0	0	0	0.14	0.06	0.09	0.02	0.08	0.02	0	0.03	0.03	0.14	0	0	0.03	0	0.01	0.1	0.09	0.03	0	0	0.1	0	0.05	0.03	0.08	0.03	0.06	0.04	0	0.13	0	0.04
1700023C21Rik	NR_045909	0	0	0	0	0	0	0.25	0	0	0	0.19	0	0.95	0	0	0	1.47	0	0	0	0	0	0	0	0	0	0	0	0	0	0	0	0	0	0	0	0	0	0	0.29	0	0	0	0	0	0	0	0
1700023E05Rik	NM_027970	0.05	0.16	0.05	0.69	0.33	0.38	0.15	0.42	0.06	0.23	0.39	0.11	2.78	1.02	0.14	0.53	0.4	0.36	0.67	0	0	0.14	0.19	0.11	0.15	0.16	0.39	0.09	0.07	0.13	0.03	0.34	0.24	0	0.08	0.05	0.56	0.05	0.17	0.06	0.24	0.14	0.06	0	0.11	0.07	0.11	0.2
1700023F02Rik	NR_038039	0	0	0.56	0	0	0	0	0.24	0	0	0.22	0	0.82	0	0.39	0	0	0	0	0	0	0.26	0	0	0.44	0	0	0.75	0	0	0	0	0.28	0	0	0	0	0	0	0	0	0	0	0	0	0	0	0
1700023F06Rik	NM_001254724	0.15	0	0.14	0.17	0.32	0.15	0.07	0.18	0.09	0.59	0.34	0.5	2.61	0.56	0.1	0.22	0.36	0.2	0.42	0.08	0.41	0.27	0.33	0	0.22	0.16	0	0	0.09	0.26	0	0.33	0.07	0.09	0	0	0.41	0.52	0	0.43	0.52	1.17	0.16	0.24	0.08	0.4	0.41	0.29
1700023L04Rik	NR_040263,NR_040264	0.58	0.11	0.54	0.93	1.39	0.19	0.69	1.39	0.97	1.75	0.96	1.43	3.64	0.18	0.75	1.46	0.27	0.49	1.69	1.15	0.77	1.12	2.03	0.47	2.48	0.61	2.2	0.74	0.54	2.53	0.44	0.79	0.93	0.18	0.23	0.72	0.93	0.71	0.63	1.13	1.65	0.92	1.86	0.7	0.59	0.94	0.78	0.27
1700024B18Rik	NR_045479	0	0	0	0	0	0	0	0	0	0	0	0	0	0	0	0	0	0	0	0	0	0	0	0	0	0	0	0	0	0	0	0	0	0	0	0	0	0	0	0	0	0	0	0	0	0	0	0
1700024F13Rik	NR_045363	0.14	0	0	0	0.59	0.29	0	0.46	0.32	0	0.21	0.47	0	0	0.19	0	0.13	0	0.51	0.28	0.25	0	0	0	0	0.6	0	0	0.35	0.36	0.18	0.16	0	0.17	0	0.28	0.3	0	0	0.47	0	0	0.07	0.23	0.29	0	0.46	0
1700024G13Rik	NM_001034037	1.52	0.77	0.47	1.62	0.35	0.35	0.49	4.09	1.13	0.66	2.26	0.85	3.01	0.63	0.99	0.37	2.87	0.44	3.66	0	0	0	0.18	0	0	0	0.39	0.21	0	0	0	0.29	0	0	0	0.25	0	0.26	0	0	1.77	0	0	0	0.26	0	0	0.95
1700024I08Rik	NR_126476	0	0	0	0	0	0.17	0	0	0	0	0	0	0.45	0	0	0	0	0	0	0	0	0	0	0	0	0	0	0.21	0	0	0	0	0	0	0	0	0.13	0	0	0	0.14	0	0	0	0	0	0	0
1700024N05Rik	NR_126471,NR_126472	0	0	0	0	0	0	0	0	0	0	0	0	0.1	0	0	0	0	0	0	0	0	0	0	0	0	0	0	0	0	0	0	0	0	0	0	0	0.15	0	0	0	0.12	0	0	0	0	0	0	0
1700024P04Rik	NM_027064	0.41	0.48	0.19	7.07	0	0.84	0.6	2	0.46	2.32	1.08	1.14	13.18	0.77	1.08	1.8	0.78	1.43	3.74	0.41	1.45	2.7	1.16	0.89	1.8	0.66	3.18	1.41	0.26	1.2	1.02	1.38	1.55	0.25	0.33	0.41	3.09	0.62	0.22	0.91	0.72	0.76	0.11	0.67	0.85	0.8	1.11	0.39
1700024P16Rik	NM_001162980,NM_001285952,NM_001285953,NR_104376	11.35	10.14	11.25	10.97	11.49	11.48	13.76	11.73	12.27	10.55	11.92	14.13	10.35	16.87	13.99	9.77	9.31	14.32	15.05	37.1	32.49	30.13	21.47	44.03	18.43	47.92	45.02	28.46	29.81	23.04	39.26	48.85	46.26	39.61	37.34	30.03	35.85	41.76	16.16	12.03	10.96	8.76	13.44	13.35	14.89	15.33	12.85	13.85
1700025B11Rik	NR_040310	0	0	0	0	0	0	0.17	0.14	0	0	0.26	0	2.39	0.43	0	0	1	0	0.16	0	0.15	0.31	0	0	0.51	0	0	0.45	0	0.15	0.22	0.39	0.16	0	0	0	0.56	0.17	0	0.19	0.2	0	0.18	0	0	0.45	0.19	0
1700025C18Rik	NR_033448	0	0	0	0	0.09	0	0	0	0	0.47	0	0	0.24	0.17	0	0	0	0.12	0.24	0	0	0.12	0	0	0.58	0	0	0	0	0.22	0.08	0	0	0	0	0	0	0	0	0.15	0	0	0	0	0	0	0	0
1700025F22Rik	NM_027074	0	0	0.14	0	0.1	0.2	0	0.12	0	0.52	0.11	0.17	4.11	0.19	0.39	0	0.43	0.26	0.69	0.45	0	0	0	0.16	0	0	0	0.13	0.19	0	0	0.5	0	0	0	0	0	0.15	0.16	0.34	0.17	0.32	0	0	0.16	0	0.16	0.28
1700025F24Rik	NR_040578	0	0	0	0	0	0	0	0	0	0	0	0	0.09	0	0	0	0	0.09	0	0	0	0	0	0	0	0	0	0.18	0	0	0	0	0	0	0	0	0	0	0	0	0	0	0	0	0	0	0	0
1700025G04Rik	NM_197990	1.61	1.74	1.26	2.21	1.72	1.14	1.74	1.81	2.36	1.63	1.24	1.65	1.58	2.27	1.66	2.19	2.15	2.07	1.49	1.21	1.5	1.41	1.24	1.42	0.71	1.02	3.23	1	1.44	1.55	1.52	1.29	0.87	1.31	1.54	1.21	1.17	1.55	8.05	7.47	5.45	6.05	6.59	8.41	6.08	7.37	5.75	8.54
1700025K24Rik	NR_045825	0	0	0	0	0	0	0	0	0	0	0	0	0	0	0	0	0	0	0	0	0	0	0	0	0	0	0	0	0	0	0	0	0	0	0	0	0	0	0	0	0	0	0	0	0	0	0	0
1700025M24Rik	NR_040687,NR_040688,NR_040689	0	0	0	0	0	0	0	0.13	0	0.13	0.12	0.14	0.61	0	0	0.24	0	0	0	0	0.11	0	0	0	0	0	0	0	0	0	0	0.19	0	0	0	0	0	0	0	0	0	0	0	0	0	0.19	0.14	0
1700025N23Rik	NR_040523	0.03	0.41	0.46	0	0.38	0.16	0.1	0.12	0.08	0.08	0	0	0	0	0.43	0	0	0.24	0	0	0.12	0	0.22	0	0.15	0.32	0.29	0.41	0	0	0.19	0	0.1	0.27	0.16	0	0	0	0.61	0.65	0	0.25	0.43	0.46	0.11	0	0.22	0
1700026D08Rik	NM_029335	2.48	0.6	0.85	0.77	0.73	1.07	1.26	2.72	0.55	0.91	2.27	1.22	7.99	1.46	0.92	2.66	0.94	1.32	2.82	0.07	0.19	0.06	0	0.23	0.4	0.43	0.21	0.12	0.09	0.24	0.3	0.46	0.26	0.09	0	0.21	0.76	0.07	0.23	0.24	0.32	0.15	0.15	0.22	0.14	0.19	0.46	0.53
1700026D11Rik	NR_028286	0	0	0.2	0.48	0.15	0.07	0.1	0.27	0	1.05	0.16	0.12	1.99	0.54	0	0	0.94	0	0.4	0	0	0	0	0.12	0.16	0	0	0	0	0	0	0	0.1	0	0	0	0.24	0.11	0	0	0.13	0.17	0	0.35	0	0	0.24	0
1700026F02Rik	NR_045487	0	0	0	0	0	0	0	0	0	0	0	0.23	0.19	0	0	0	0	0	0.74	0.2	0	0.18	0	0	0.3	0	0	0.17	0.25	0	0	0	0	0	0	0.2	0	0	0.22	0	0	0	0	0	0	0.26	0	0
1700026L06Rik	NM_027283	2.13	1.75	1.71	2.44	3.12	1.99	1.35	4.56	1.58	1.96	2.96	1.86	12.43	3.99	0.92	3.08	4.7	3.53	3.34	1.98	1.25	8.62	4.5	3.21	2.85	1.63	15.52	1.58	2.8	2.48	6.29	7.46	1.58	2.08	3.4	1.28	4.4	4.05	43.23	45.11	50.21	59.7	41.1	38.63	56.47	54.39	38.74	41.01
1700027A15Rik	NR_038001,NR_038002	0.96	4.28	1.57	4.61	3.65	5.43	4.44	6.41	1.62	11.04	5.01	4.29	48.17	2.09	1.88	6.97	12.97	4.82	12.4	3.09	7.18	13.43	7.6	6.77	15.82	3.38	19.72	8.56	11.93	10.8	4.16	6.21	4.75	0.73	6.99	8.11	18.51	6.77	2.85	6.09	11.19	4.69	1.85	2.73	0.74	2.79	2.33	2.7
1700027F09Rik	NR_040681	0	0	0	0	0	0	0	0	0	0	0	0	0.11	0	0	0.18	0	0	0	0	0	0	0	0	0	0	0	0	0	0	0	0	0	0	0	0	0	0	0	0	0.28	0	0	0	0	0	0	0
1700027H10Rik	NR_040594	0	0	0.11	0	0	0	0	0	0	0.07	0	0	0	0	0	0	0	0	0	0.14	0	0	0	0	0	0	0	0	0	0	0	0	0	0	0	0	0	0	0	0.4	0	0	0	0	0	0	0	0
1700027I24Rik	NR_040741	0	0	0	0	0	0	0	0	0	0	0	0	0.12	0	0	0	0	0	0.12	0	0	0	0	0	0	0.14	0	0	0	0	0	0	0.25	0	0	0	0	0	0	0.15	0	0	0	0	0	0	0	0
1700027J07Rik	NR_040581	0	0.07	0	0	0	0	0	0.07	0	0	0.06	0	0	0	0	0.25	0	0	0	0	0	0	0	0	0	0	0.13	0.23	0	0	0	0	0.08	0	0	0	0	0	0.09	0	0	0	0	0	0	0	0.19	0
1700028B04Rik	NR_033605	0	0	0	0	0	0	0	0	0	0	0	0	0.16	0	0	0	0	0	0	0	0	0	0	0	0	0	0	0	0	0	0	0	0	0	0	0	0	0	0	0	0	0	0	0	0	0	0	0
1700028D13Rik	NR_045377,NR_045378	0	0	0	0	0	0	0	0	0	0	0	0.19	0.95	0	0	0	0.82	0	0.63	0	0	0	0	0	0	0	0	0	0.21	0	0.21	0	0	0	0	0	0	0.17	0	0	0.15	0	0	0	0	0.67	0	0
1700028E10Rik	NR_045699,NR_045700	0.22	0.22	0.35	0.62	0.27	0.06	0.2	0.31	0.24	0.49	0.21	0.56	0.84	0.68	0.62	0.41	0.93	0.38	0.43	0.42	0.57	0.61	0.53	0.89	0.26	0.4	0.64	0.66	0.59	0.61	0.4	0.7	0.48	0.59	0.3	0.38	0.62	0.79	0.33	1.75	1.08	1.14	0.52	0.85	1.21	0.52	0.71	0.89
1700028I16Rik	NR_038042	0	0	0	0	0	0.12	0.08	0.14	0	0.38	0	0.19	0.39	0.11	0	0.25	0.08	0.22	0	0.18	0.15	0.08	0	0	0.37	0.18	0.13	0.08	0	0	0	0.19	0	0	0.14	0	0.47	0	0.28	0	0.2	0.18	0.14	0.14	0.18	0.23	0.66	0.33
1700028J19Rik	NR_029436	0.93	1.37	1.36	1.01	1.7	1.69	1.96	1.73	0.86	2	1.56	1.51	19.09	2.25	1.61	2.35	3.08	1.71	2.94	0.78	1.03	1.21	0	1.25	1.75	0.79	3.03	1.13	0.76	0.71	1	1.67	1.28	1.14	0.74	0.62	1.82	1.13	1.01	1.56	1.4	2.41	1.25	1.6	1.43	2.43	2.25	2.02
1700028K03Rik	NM_175241,NM_182745	0.03	0.18	0	0	0.08	0.08	0.08	0.12	0.03	0.02	0.04	0.16	0.67	0.11	0	0	0.14	0.1	0.18	0.09	0.03	0.1	0.18	0.06	0	0.03	0.17	0	0.11	0.05	0.02	0.06	0.18	0.15	0.18	0.06	0	0.11	0.03	0	0	0	0.08	0.09	0.03	0.19	0	0.21
1700028M03Rik	NR_036591	0	0	0	0	0	0	0	0	0	0	0	0	0	0	0	0.61	0	0	0	0	0	0	0	0	0	0	0	0	0	0	0	0	0	0	0	0	0	0	0	0	0	0	0	0	0	0	0	0
1700028P14Rik	NM_026188	1.51	0.75	1	0.23	0.74	0.72	1.22	2.16	0.36	1.3	0.88	0.7	5.23	0.66	1.12	0.31	1.63	1.65	2.63	0	0	0.19	0	0.12	0.61	0.11	0.81	0.09	0.27	0.18	0.2	0.12	0	0.26	0.17	0.11	0.58	0.11	0.7	0.48	1.34	0.63	0.34	0.17	0.22	0.28	0.23	0.6
1700028P15Rik	NR_040509	0	0	0	0	0	0	0	0	0	0	0	0	0.1	0	0	0	0	0	0	0	0	0	0	0	0	0	0	0	0	0	0	0	0	0	0	0	0	0	0	0.12	0	0	0	0	0	0	0	0
1700029B22Rik	NR_040531	0	0	0	0	0.66	0.18	0	0.22	0	0.23	0.3	0	3.93	0	0	0.2	0.64	0	1.11	0.14	0	0.35	0	0	0.58	0.14	1.03	0.12	0	0.11	0	0	0.25	0	0	0	0.29	0.13	0	0	0.16	0	0	0	0	0	0	0.51
1700029F12Rik	NM_001080777,NM_001284205,NM_025585,NR_104276	0.49	0.5	0.23	2.48	1.06	1.01	1.15	1.49	0.28	2.31	1.26	1.32	22.77	1.88	0.12	1.87	1.64	1.04	1.69	0.28	0.43	0.7	0.17	0.1	1.07	0	1.94	0.43	0	1.02	0.17	1.32	0.85	0.23	0.53	0.19	2.18	0.48	0.44	0.64	1.47	1.97	0.65	0.27	0	1.28	0.61	0.91
1700029H14Rik	NM_001080781,NM_025601	0.38	0.57	0.97	1.48	0.96	1.05	1.11	0.97	0.85	0.7	1.41	1.7	15.22	2.8	0.08	2.32	3.48	1.16	2.41	0.55	1.11	1.31	0.43	0.79	1.87	0.28	2.88	1.73	0.64	1.36	0.69	1.74	0.96	0.25	0.5	0.62	3.2	1.09	0.59	0.64	2.01	0.81	0.48	1.3	0.52	3	0.81	2.08
1700029I15Rik	NM_183112	0	0.21	0.52	0	0.39	0.39	0	0.68	0.31	0.97	0.63	0.31	1.03	0.7	0	0	0.53	0.25	0.76	0	0	0.24	0	0.3	0.41	0.92	0.87	0.47	0	0	0.52	0.32	0.27	0	0.45	0.55	0	0	0	0	0.33	1.33	0	0.46	0.29	1.08	0	0
1700029J03Rik	NR_040494	0	0	0	0	0	0	0	0	0.13	0	0	0	0	0	0	0	0	0	0	0	0	0	0	0	0	0	0	0	0	0	0	0	0	0	0	0	0	0	0	0	0	0	0	0	0	0	0	0
1700029J07Rik	NM_001033148	4.06	3.24	4.49	3.98	5.01	4.52	4.48	5.41	4.21	3.17	3.8	4.32	6.51	6.14	3.03	3.22	3.13	5.77	6.04	2.81	3.07	3.3	3.69	3.27	3.08	5.45	6.1	3.23	3.87	2.34	3.68	3.35	4.73	3.07	2.43	2.64	4.8	3.25	5.22	5.31	4.69	4.39	5.73	4.46	4.44	5.12	5.48	4.56
1700029M20Rik	NR_015613,NR_027909	0.03	0.12	0.03	0.69	0.13	0.04	0.29	0.2	0	0.54	0.31	0.07	4.33	0.88	0	0.23	0.39	0.24	0.63	0.06	0	0	0	0	0.09	0	0	0.03	0.08	0.03	0.08	0.17	0.12	0	0	0	0.56	0.06	0.03	0.04	0.25	0.02	0.03	0	0	0.25	0.07	0.12
1700029N11Rik	NR_045489	0	0	0	0	0	0	0	0	0	0	0	0	0	0	0	0	0	0	0	0	0	0	0	0	0	0	0	0	0	0	0	0	0.16	0.21	0	0	0	0	0	0	0	0	0	0	0	0	0	0
1700029P11Rik	NM_025503	0.27	0.07	0.17	1.17	0.19	0.18	0.09	0.36	0	0.16	0.07	0	3.65	0.22	0	0.65	0.34	0.08	0.33	0	0.08	0.08	0	0.1	0.13	0.28	0	0.16	0.33	0.08	0.5	0.1	0.17	0.22	0	0.09	0.68	0.35	0.39	0.1	0	0.57	0.47	0.14	0.09	0.35	0.19	0.17
1700030A11Rik	NR_045457	0.11	0	0	0	0.07	0	0	0	0	0.09	0	0	0.47	0	0	0	0	0	0	0	0	0	0	0	0	0	0	0	0	0	0	0	0	0	0	0	0.11	0	0	0	0	0	0	0	0	0	0	0
1700030C10Rik	NR_015521	0.21	0.17	0	0	0.26	0.14	0.2	0.08	0.06	0.32	0.12	0.17	0.24	0.2	0.2	0.21	0.1	0.22	0.19	0.03	0.1	0.15	0	0.05	0	0.05	0.08	0	0.06	0	0.03	0.11	0.05	0.25	0.18	0	0.05	0	0.06	0.06	0.06	0	0.08	0	0	0	0	0
1700030F04Rik	NR_045731	0.24	0	0	0	0	0	0	0	0.27	0.72	0.18	0.27	1.97	0	0	0	0	0	0.22	0	0	0	0	0	0	0	0.74	0	0.59	0	0	0	0	0	0	0	0	0	0	0	0	0	0.12	0	0.25	0	0.08	0.45
1700030F18Rik	NM_028180	0.31	0.59	0.14	0.99	0.21	0	0.15	0.5	0.17	0.4	0	0.17	2.09	0	0.2	0.22	0.73	0.13	0.56	2.92	1.77	2.81	0.98	0.67	0.44	0.81	2.11	3.69	0.38	1.67	0.29	0.17	1.72	2.45	0.99	0.92	0.82	0.3	1.67	2.74	0.88	1.71	1.91	0.74	1.43	0.8	1.49	0.29
1700030J22Rik	NM_027103	2.08	1.59	1.69	1.77	1.88	1.54	1.82	1.83	1.97	1.65	1.79	1.84	5.53	2.28	1.37	1.92	2.51	2.26	2.24	0.85	1.36	0.88	0.83	1.13	0.8	1.4	1.08	0.94	1	1.05	0.87	1.54	1.29	1.15	0.95	1.06	1.1	1.08	1.18	1.66	2.49	1.4	1.43	1.81	1.17	1.46	1.62	2.01
1700030K09Rik	NM_028170	3.37	4.27	3.31	3.38	4.4	3.93	4.14	5.59	5.3	4.86	3.67	4.82	5.62	5.98	3.72	4.72	4.31	4.44	5.63	3.89	2.98	2.94	4.75	3.98	2.29	4.11	6.13	4.04	3.83	3.46	3.71	3.8	2.9	3.02	4.27	3.88	3.21	2.72	4.42	5.17	4.07	5.44	4.18	4.69	2.91	5.98	4.5	5.78
1700030L20Rik	NR_040592	0.4	0.15	0.19	0	0.31	0.45	0.09	0.19	0.96	0.29	0.34	0.53	1.11	0.21	0.22	0	0.22	0.46	0.39	0.14	0.15	0	0.33	0.24	0.02	0.28	0.26	0.15	0.38	0.09	0.32	0.04	0.28	0.11	0	0.28	0.96	0	0.33	0.13	0.6	0.24	0.33	0.14	0.28	0.3	1.37	0.18
1700030M09Rik	NR_045903	0	0	0	0	0	0.13	0	0	0	0	0	0	0.35	0	0	0	0	0	0.09	0.1	0	0	0	0	0	0	0.15	0	0	0	0	0.1	0	0	0	0	0.31	0	0	0.22	0	0.15	0	0	0	0	0	0
1700030N03Rik	NR_045304	0	0	0.24	0	0	0	0	0	0	0	0	0	0.23	0	0	0	0.24	0	0	0	0	0	0	0	0	0	0	0	0	0	0	0	0	0	0	0	0	0	0	0	0	0	0	0	0	0	0	0
1700030O20Rik	NR_045345	0	0	0.15	0	0	0.11	0	0	0	0	0	0	0.59	0.2	0	0	0.15	0	0	0	0	0	0.46	0	0	0	0	0	0	0	0	0	0	0	0	0	0	0.16	0	0.18	0	0	0	0.26	0	0.63	0.17	0
1700031A10Rik	NR_045439	0	0	0	0	0	0	0	0	0	0	0	0	0	0	0	0	0	0	0	0	0	0	0	0	0	0	0	0	0	0	0	0	0	0	0	0	0	0	0	0	0	0	0	0	0	0	0	0
1700031F05Rik	NM_028496	0.07	0	0	0	0	0	0	0	0	0	0	0.07	0.06	0	0	0	0	0	0	0	0	0	0	0	0	0	0	0	0	0	0	0	0	0	0	0	0	0	0	0	0	0	0	0	0	0	0	0
1700031M16Rik	NR_015496	0	0.26	1.26	0.74	0.7	0.83	0.65	1.09	0.25	2.25	1.27	1.49	9.63	2.08	1.04	1.81	0.75	0.68	2.16	1.37	1.2	1.58	1.53	0.61	1.62	1.06	3.27	1.66	1.55	0.95	0.35	1.86	1.26	0.14	0.91	0.68	2.19	0.78	0.74	0.89	2.46	1.56	1.12	0	0.23	0.3	1.47	0.64
1700031P21Rik	NR_045910	0	0.26	0	0	0.48	0.48	0.69	0	0	0.6	1.03	1.18	3.84	1.74	0	0.5	1.96	0.92	2.82	0.34	0.61	1.52	1.45	0	0	0	1.09	1.16	1.29	1.44	0	0	0	0	1.7	0.34	0.74	0.71	0.37	0	1.64	0.55	0.18	0.57	0	0.88	0.74	0.65
1700034E13Rik	NM_030097	0.21	2.05	0.77	1.76	0.57	0.42	0.8	2	0.23	1.96	1.38	0.91	14.46	2.04	0	0	1.37	0.71	0.93	0.41	0.91	2.51	0.87	0.89	2.39	0.66	2.54	0.88	0	1.54	1.27	0.92	1.54	0	1.66	1.23	3.53	1.03	1.11	1.37	1.19	0.98	0.32	0	0.21	0.8	0.44	0.39
1700034F02Rik	NM_001163521,NM_028504	0.21	0.36	0.23	0.55	0.49	0.27	0.16	0.4	0.28	0.14	0.25	0.5	1.98	0.4	0.22	0.42	0.36	0.18	0.45	0.17	0.26	0.18	0.42	0.32	0.12	0.34	0.25	0.11	0.05	0.07	0.36	0.4	0.34	0.21	0.13	0.3	0.22	0.24	0.05	0.19	0.28	0.46	0.31	0.07	0.04	0.16	0.27	0.38
1700034G24Rik	NR_045396,NR_045397	0	0	0	0	0.06	0	0	0.35	0.1	0.15	0.07	0.1	1.01	0.11	0	0	0.33	0.07	0	0	0	0.15	0	0	0.12	0	0	0	0	0.22	0	0.1	0	0	0.14	0	0.09	0.09	0	0	0	0.28	0	0	0	0.23	0	0
1700034H15Rik	NR_030669	0.19	0.18	0.24	0.14	0.24	0.19	0.1	0.26	0.24	0.18	0.2	0.2	0.38	0.31	0.18	0.4	0.13	0.24	0.36	0.02	0.23	0.04	0.12	0.17	0.06	0.35	0.47	0.07	0.13	0.09	0.3	0.25	0.33	0.17	0.1	0.08	0.27	0.19	0.21	0.41	0.24	0.2	0.28	0.26	0.17	0.44	0.29	0.35
1700034I23Rik	NR_045380	0.15	0.13	0	1	0.53	0.45	0.31	0.7	0	0.39	0.41	0.71	6.13	0.89	0.1	0.5	0.58	0.53	1.4	0.52	0.5	0.35	0.25	0.81	0.85	0.37	1.35	0.81	0.43	0.78	0.24	0.94	0.56	0.28	1.03	0.23	0.96	0.39	0.24	1.08	0.85	0.6	0.5	0.38	0.39	0.92	0.82	1.01
1700034J05Rik	NM_001164236,NM_028509	0.09	0.27	0.12	0.19	0.24	0.17	0.25	0.28	0.15	1.07	0.17	0.14	6.82	0.43	0.12	0.9	0.88	0.6	1.09	0.04	0.08	0.19	0.16	0.05	0.31	0.22	0.73	0.15	0.16	0.07	0.03	0.86	0.16	0.22	0.14	0.04	0.62	0.34	0.24	0.5	0.9	0.89	0.23	0.99	0.32	0.41	0.53	0.91
1700034K08Rik	NR_040756	0	0	0.14	0	0	0	0	0.12	0	0	0.12	0	1.27	0	0.2	0.22	0.44	0	0.28	0	0	0	0	0	0	0	0	0	0.19	0	0	0	0	0	0	0	0	0.31	0	0	0.36	0	0.08	0	0.48	0	0.67	0.29
1700034O15Rik	NM_029671	0.38	1.08	0.94	1.65	1.93	1.87	1.57	1.64	0.85	1.65	1.14	1.53	7.82	1.71	2.16	2.21	4.22	2.07	2.31	1.15	0.22	2.43	2.43	1.93	3.46	1.33	4.83	2.29	1.73	2.02	1.41	3.2	1.77	0.94	1.63	2.81	3.82	1.75	0.55	0.99	1.89	1.14	0.53	1.43	0.52	0.83	1.23	1.19
1700034P13Rik	NR_040462	0.15	0.07	0	0	0.22	0.16	0.08	0.07	0.19	0	0.18	0.28	0.15	0	0	0.12	0	0.07	0.37	0.18	0	0.06	0.71	0.41	0	0.22	0	0.12	0.38	0.06	0.36	0	0.07	0.51	0.5	0.64	0.1	0.16	0.2	0.32	0.22	0.43	0.37	0.13	0.08	0.49	0.09	0.16
1700036G14Rik	NR_040542	0.36	0.28	0.5	0	0.62	0.73	0.35	0.87	1.41	0.47	0.67	0.6	3.11	0.22	1.17	0.26	0.17	0.47	0.16	0	0	0	0	0.19	0.52	0	0	0.15	0	0	0	0	0	0	0	0	0.19	0	0.19	0.2	0	0.09	0.19	0.29	0.56	0	0	0
1700037C18Rik	NM_028484	7.66	7.92	7.76	9.46	10.06	9.96	8.31	10.97	6.36	5.93	8.95	10.66	10.26	7.85	8.44	9.25	7.64	8.87	9.74	10.81	9.36	9.75	9.93	9.61	11.92	8.02	11.39	10.43	12.14	10.57	10.14	9.82	10.26	7.96	8.94	10.65	11.6	8.28	6.93	7.15	8.74	9.9	6.65	6.02	6.8	5.06	6.87	6.73
1700037H04Rik	NM_026091	14.5	17.75	19.71	14.41	17.07	21.47	17.49	18.21	17.1	20.78	14.86	17.2	29.35	16.92	15.8	18.94	22.88	19.59	21.74	23.48	16.78	23.53	21.86	27.55	26.88	16.78	25.65	29.71	19.52	21.67	17	36.66	21.19	18.18	17	38.06	14.39	22.58	8.73	5.72	7.34	7.34	8.47	8.93	7.25	5.13	9.93	7.97
1700039E15Rik	NM_001033176	0.21	0.61	0.19	0.11	0.5	0.21	0.2	0.63	0.17	1.39	0.55	0.79	9.92	0.63	0.2	0.99	0.89	0.44	1.37	0.05	0	0.23	0.11	0.28	0.44	0.16	0.39	0.14	0.19	0.13	0.06	0.51	0.33	0	0	0.11	0.9	0.15	0.11	0.41	0.59	0.66	0.25	0.41	0.21	0.89	0.56	1.26
1700039E22Rik	NR_045315	0.24	0.28	0.23	0	0.59	0.24	0.23	0.2	0.14	0	0.18	0.27	0.22	0.15	0.48	0	0.46	0	0.11	0.37	0.75	0.11	0.17	0.66	0.35	1.91	1.11	0.31	0.15	0.71	0.83	0.93	1.24	0.75	0.78	0.37	0.39	0.36	0.79	2.18	0.14	1.94	0.82	0.98	0.25	0.8	1.05	1.14
1700040L02Rik	NM_028491	5.93	5.38	5.61	5.14	3.31	6.31	4.8	5.87	6.43	4.46	5.24	5.21	12.89	4.76	2.7	4.83	2.67	4.15	7.85	16.32	15.25	13.33	14.47	15.01	11.01	15.54	17.03	15.59	16.73	15.31	12.4	14.78	14.39	14.22	15.04	14.09	15.46	13.56	16.39	14.04	12.04	11.12	15.59	12.96	15.91	15.23	11.95	12.54
1700041A01Rik	NR_126428	0.83	0	0	0	0.95	0.57	1.08	0	0.31	0	0.21	0.31	1.52	0.69	0	0.8	0.52	0.24	0.75	0	0	0	0	0	0	0	0	0	0	0.23	0	0	0	0	0	0	0	0	0	0	0	0	0	0	0	0	0	0
1700041C23Rik	NR_033784	0	0.19	0	0	0.17	0	0.25	0	0	0.66	0.38	0	2.32	0	0	0	1.2	0	0.69	0	0	0	0	0	0.74	0	0	0	0	0	0	0	0	0	0	0	0.27	0	0	0.56	0.3	0	0	0	0.26	2.28	0	0.48
1700041M19Rik	NR_040573	0	0	0.08	0	0	0.05	0	0.13	0	0.07	0	0.09	0.95	0.1	0	0.12	0	0.07	0.3	0	0	0	0	0	0	0	0	0	0	0	0	0	0.07	0	0	0	0	0	0	0	0	0	0	0	0	0	0	0
1700042B14Rik	NM_001081671	0.09	0.07	0	0	0	0.06	0.08	0	0.1	0.23	0	0	0	0	0	0.13	0.25	0.07	0.08	3.95	3.25	2.65	2.1	3.68	2.61	2.59	2.37	3.47	3.67	3.57	1.88	2.12	3.7	4.56	3.89	2.2	2.9	3.33	0.76	1.44	0.87	1.06	0.8	1.06	0.9	1.03	0.38	1.79
1700042G07Rik	NM_001099295	0.52	0.59	0.24	0	0.53	2.12	1	1.87	1.15	3.79	0.38	1.73	17.69	2.88	1.34	1.49	1.46	0.22	2.33	0.51	0.68	1.8	0.72	0.28	2.26	0.28	2.8	2.61	1.6	1.28	0.32	2.03	1.21	0.31	2.08	0.51	6.87	0.52	0.83	1.7	0.9	1.35	0.79	0.84	0	0.99	1.66	0.97
1700042G15Rik	NR_038178,NR_038179	0	0.07	0.17	0	0.06	0.12	0.04	0.04	0.1	0.11	0.03	0.15	1.14	0.11	0	0.13	0.04	0.04	0.08	0	0	0	0	0	0.06	0	0.07	0.08	0	0.15	0	0.15	0.08	0	0	0	0	0	0	0.1	0.15	0	0.05	0	0	0.06	0	0.08
1700042O10Rik	NR_045178	0	0.07	0.08	0	0	0.23	0.08	0	0	0.07	0	0.28	0.08	0.31	0	0.5	0	0	0.16	0	0	0	0.49	0.09	0	0	0.13	0.07	0	0.21	0	0.09	0	0	0	0	0	0.08	0	0	0.1	0	0.04	0	0.09	0	0.09	0
1700044C05Rik	NR_045624	0	0	0	0	0	0	0	0	0	0	0	0	0	0	0	0	0	0	0	0	0	0	0	0	0	0	0	0	0	0	0	0	0	0	0	0	0	0	0	0	0	0	0	0	0	0	0	0
1700044K03Rik	NR_033785	0	0	0	0	0	0.18	0	0.22	0	0	0	0	0.25	0	0	0	0	0	0	0	0	0	0	0	0	0	0	0	0	0.45	0	0	0	0	0	0	0	0	0	0	0	0	0	0	0	0	0	0.5
1700045H11Rik	NR_040649	0	0	0	0	0.11	0	0	0	0	0	0	0	0.29	0	0	0	0	0	0	0	0	0	0	0	0	0	0	0	0	0	0	0	0	0	0	0	0	0	0	0	0.37	0	0.25	0	0	0	0	0
1700046C09Rik	NR_045918	0	0	0	0	0	0	0	0	0	0	0	0.19	0	0	0	0	0	0	0	0	0	0	0	0	0	0	0	0	0	0	0	0	0	0	0	0	0	0.17	0	0	0	0	0	0.28	0	0	0	0
1700047A11Rik	NR_110583	0	0.12	0.14	0	0.11	0.1	0	0	0	0	0	0	0.28	0	0	0.22	0	0.13	0	0.15	0	0.4	0	0	0	0	0	0	0	0	0	0	0.14	0	0	0	0.33	0	0	0	0	0	0	0	0	0	0	0
1700047E10Rik	NR_073363	0.53	0	0.54	1.1	0.99	0	0	0.19	0.39	0	0.13	0.19	0.16	0.64	0	0.54	0	1.03	0	0.29	0.15	0	0	0	0	0	0	0	0	0	0	0.19	0.48	0	0	0.34	0.36	0	0.19	0.43	0.39	0.18	0.28	0.28	0.36	0	0.19	0
1700047G03Rik	NR_040447	0.11	1.03	0.1	0	0.23	0.15	0.11	0.27	1.86	0.86	0	0	1.1	1.09	0.29	2.42	4.43	0.1	0.2	0.33	0.98	0.48	1.65	0.6	1.27	0.12	0.67	0.19	6.47	13.92	0.82	0	4.11	0.27	0.53	2.57	1.67	3.06	0.36	1	0.13	1.65	0.12	1.78	0	0	0.24	0.83
1700047I17Rik2	NM_001100116,NM_001100116_chr12:55199591_55217146	8.62	7.73	6.91	6.65	8.24	7.04	8.36	6.41	8.51	7.71	6.46	7.9	10.2	9.43	8.73	7.5	7.94	8.13	6.77	9.35	8.72	9.13	8.18	10.84	8.19	12.51	8.06	10.56	9.3	10.78	10.12	10.08	11.63	10.46	10.12	9.37	9.86	10.18	11.36	10.82	9.58	7.09	10.48	9.1	10.39	9.9	10.84	10.8
1700047L14Rik	NR_040691	0	0	0	0	0	0	0	0	0	0	0	0	0.17	0	0	0	0	0	0	0	0	0.17	0	0	0	0	0	0	0	0	0	0	0	0	0	0	0	0	0	0	0	0	0	0	0	0	0	0
1700047M11Rik	NR_015458	0.14	0	0	0	0	0.09	0	0	0	0.12	0.21	0.15	0.5	0	0	0	0.13	0	0	0.14	0.37	0.36	0	0	0	0.14	0.84	0.24	0.17	0.12	0.6	0.15	0.13	0	0	0.42	0	0.14	0	0.15	0	0.37	0	0.44	0	0	0	0
1700048M11Rik	NR_045300	0	0.62	0.38	0	0	0	0	0.49	0	0	0	0	0.37	0.25	0	0	0	0	0	0.2	0.18	0	0.29	0.22	0	0.22	0.63	0.35	0.5	0	0.13	0	0.19	0	0	0	0.22	0.2	0.22	0	0.47	0	0	0	0	0	0	0
1700048O20Rik	NR_033553	0.71	0.84	0.05	0.43	0.59	0.47	0.18	0.62	1.25	1.06	0.49	0.32	0.85	0.71	0.34	0.92	1.12	0.26	1.03	0.99	1.3	1.27	1.41	1.17	1.65	0.74	2.11	1.14	1.51	1.71	1.65	0.71	1.33	1.03	1.39	2.4	1.41	1.46	1.02	1.11	0.6	0.91	1.35	1.56	1.05	2.91	0.84	1.32
1700049E15Rik	NR_033636	0	0.08	0	0	0.07	0.13	0	0	0	0	0	0	0.27	0	0	0.15	0	0	0.09	0.1	0	0	0	0	0	0	0	0.17	0	0.25	0	0	0	0	0.16	0	0	0	0.11	0.11	0.11	0	0	0	0.1	0	0	0
1700049E22Rik	NR_040525	0	0	0	0	0	0	0	0	0	0	0	0	0	0	0	0	0	0	0	0	0	0	0	0	0	0	0	0	0	0	0	0	0	0	0	0	0	0.19	0	0	0	0	0	0	0	0	0	0
1700049G17Rik	NM_028538	1.58	1.33	1.17	0.92	1.68	1.16	1.59	2.38	1.91	1.17	1.26	2.15	1.93	2.58	1.7	1.22	1.23	1.53	2.72	1.52	1.65	1.15	0.91	1.5	0.43	1.59	3.27	1.26	1.71	1.22	1.25	1.52	1.02	1.47	1.88	1.19	1.56	1.2	1.56	2.07	1.58	1.4	1.56	2.28	1.05	2.03	1.66	3.04
1700049L16Rik	NR_003644	0	0.09	0.11	0	0.4	0.08	0.11	0.09	0	0.4	0.09	0	2.1	0.43	0.3	0.17	0.55	0.1	0.84	0	0	0.2	0	0	0.5	0	0.53	0	0.14	0.19	0.07	0.63	0.11	0	0	0	0.25	0.11	0.38	0.52	0.26	0.25	0.36	0.56	0	0.91	0.25	0.22
1700051A21Rik	NR_045922	0.13	0.1	0.12	0	0.09	0.09	0.06	0.38	0	0.52	0.3	0.07	3.74	0.57	0.18	0.68	0.45	0.17	0.61	0	0	0.12	0	0.07	0	0	0.1	0	0.08	0.06	0	0.22	0.12	0.08	0	0	0.29	0.13	0.15	0.15	0.38	0	0.04	0	0	0.26	0.22	0.13
1700052I22Rik	NR_033786	0	0	0	0	0.19	0.19	0	0.22	0.3	0	0.6	0	2.47	0	1.05	0.78	0.76	0.94	0.97	0	0.94	0.47	0.38	0.87	0.79	0.29	0	0	0	0.22	0.17	1.52	0.25	0	2.18	0	1.73	0.82	1.16	0.59	0.63	0	0	0.44	0	0	1.45	0.51
1700052K11Rik	NR_027956	7.44	7.11	7.2	6.21	5.96	6.39	6.92	9.5	6.92	7.57	5.06	5.72	6.29	9.68	6.52	5.96	6.67	5.75	10.27	7.3	8.27	6.19	6.96	7.33	4.77	7.22	10.93	8	9.16	7.55	6.83	6.75	7.66	8.63	8.54	7.42	7.7	7.5	11.22	11.87	10.76	11.47	11.08	13.24	8.75	13.62	11.92	10.38
1700052N19Rik	NM_024261	7.08	5.99	6.73	7.17	6.48	7.67	8.06	7.37	6.63	5.83	6.11	7.86	8.84	8.29	7.27	7.4	5.13	6.61	7.22	8.96	11.47	8.07	11.22	10.23	7.13	8.14	10.97	9.9	12.11	9.95	9.51	9.41	8.63	11.64	10.92	10.14	11.31	10.1	13.09	12.33	9.87	13.17	11.08	14.12	9.3	13.36	12.46	12.55
1700054A03Rik	NR_045320	0	0	0	0	0	0	0.11	0	0	0	0	0	0.33	0	0.16	0	0	0	0	0	0	0	0	0	0.17	0.13	0.18	0.1	0.15	0	0	0	0	0	0	0.12	0	0.12	0	0	0	0	0	0	0	0	0	0
1700054K19Rik	NR_027865	0	0	0	0	0	0	0	0	0	0	0	0	0	0	0	0	0	0	0	0	0	0	0	0	0	0	0	0	0	0	0	0	0	0	0	0	0	0	0	0	0	0	0	0	0	0	0	0
1700054M17Rik	NR_045919	0	0	0	0	0	0	0	0	0	0	0	0	0	0	0	0	0	0	0	0	0	0	1.1	0	0	0	0	0.38	0	0	0	0	0	0	0	0	0	0	0	0	0	0	0	0	0	0	0	0
1700055C04Rik	NR_040726	0	0	0	0	0	0	0	0	0	0	0	0	0	0	0	0	0	0	0	0	0	0	0	0	0	0	0	0	0	0	0	0	0	0	0	0	0	0	0	0	0	0	0	0	0	0	0	0
1700055N04Rik	NM_028545	0.76	0.9	0.55	0	1	0.57	0.51	0.69	0.45	0.76	0.41	0.58	1.19	0.66	0.44	0.46	0.9	0.79	0.65	0.8	0.27	0.05	0.33	1.23	0.89	0.74	0.49	0.55	1.32	1.03	0.68	0.73	0.65	0.42	0.65	1.59	0.76	1.16	0.28	0.74	0.47	0.55	0.27	0.91	0.5	0.31	0.4	0.61
1700056E22Rik	NM_028516	1.73	2.37	3.28	3.53	4.36	1.78	2.72	4.54	2.89	3.3	4.5	3.65	3.11	4.2	5.75	1.39	4.72	2.29	3.74	3.18	2.46	2.83	3.73	2.28	1.36	0.89	2.61	3.06	2.02	2.16	1.83	1.46	0.97	1.53	1.83	1.25	1.44	1.69	2.29	1.29	3.26	1.83	3.59	1.22	2.46	2.88	2.06	1.07
1700057G04Rik	NM_001033184	0.18	0	0.16	0.57	0	0.06	0	0.28	0	0.3	0.07	0.1	1.81	0.21	0	0.51	0.58	0.45	0.64	0.18	0	0.23	0.68	0.09	0.62	0.09	0.13	0.15	0.22	0.15	0.11	0.48	0.08	0.11	0	0	0.47	0.09	0.1	0.88	0.5	0.74	0	0.14	0.18	0.11	0.09	0
1700057H15Rik	NR_040774	0	0	0	0	0	0	0	0	0	0	0	0	0	0	0	0	0	0	0	0	0	0	0	0	0	0	0	0	0	0	0	0	0	0	0	0	0	0	0	0	0	0	0	0	0	0	0	0
1700057H21Rik	NR_130155	0	0	0	0	0	0	0	0	0	0.33	0	0	0	0	0	0	0	0	0	0	0	0	0	0	0	0	0	0	0	0	0	0	0	0	0	0	0	0	0	0	0	0	0	0	0	0	0.21	0.36
1700060C16Rik	NR_045732	0	0	0	0	0	0	0	0	0	0	0	0	0	0	0	0	0	0	0	0	0	0	0	0	0	0	0	0	0	0	0	0	0	0	0	0	0	0	0	0	0	0	0	0	0	0	0	0
1700060C20Rik	NR_036606	0	0	0	0	0	0	0	0.13	0	0	0.24	0	0	0	0	0	0	0	0	0.16	0.43	0	1.15	0.35	0.23	0	0	0.28	0.4	0	0.2	0	0	0	0	0.49	0.35	0	0.18	0	0	0	0.17	0.52	0.17	0	0.53	0
1700061F12Rik	NR_038180	0.11	0.16	0	0	0.15	0.14	0.2	0	0	0	0	0	1.05	0.26	0	0	0.2	0.27	0.38	0	0	0.18	0	0	0.3	0	0	0	0.13	0	0	0.23	0.1	0	0	0	0.23	0.1	0.11	0.12	0	0.45	0.38	0.17	0.22	0.55	0.34	0
1700061G19Rik	NM_030141	0.07	0.08	0.03	0	0.18	0.05	0.1	0.15	0.08	0.22	0.08	0.12	1.67	0.18	0.14	0.11	0.55	0.25	0.43	0.3	0.16	0.28	0.44	0.16	0.51	0.33	0.05	0.32	0.09	0.18	0.04	0.55	0.2	0.18	0.17	0.18	0.31	0.18	0.08	0.25	0.37	0.19	0.11	0.17	0.04	0.24	0.16	0.2
1700061I17Rik	NR_038029	0	0	0	0	0	0	0	0	0	0	0	0	0	0	0	0	0	0	0	0	0	0	0	0	0	0	0	0	0	0	0	0	0.08	0	0	0	0	0	0	0	0	0	0	0	0	0	0	0
1700063A18Rik	NR_040467	0	0	0	0	0	0	0	0	0	0	0	0	0	0	0	0	0	0	0	0	0	0	0	0	0	0	0	0	0	0	0	0	0	0	0	0	0	0	0	0	0	0	0	0	0	0	0	0
1700063D05Rik	NR_040392	0	0.1	0	0	0	0	0	0	0	0	0	0	0.24	0	0.35	0.19	0.38	0	0	0	0	0	0	0.14	0	0	0	0.23	0	0	0	0	0.37	0	0.21	0	0	0.13	0	0	0	0	0.35	0	0	0	0.43	0
1700063O14Rik	NR_045383	0	0	0	0	0	0	0	0	0	0	0	0	0	0	0	0	0	0	0	0	0	0	0	0	0	0	0	0	0	0	0	0	0	0	0	0	0	0	0	0	0	0	0	0	0	0	0	0
1700064J06Rik	NR_045348	0	0	0	0	0	0	0	0	0	0	0	0	0.48	0	0	0	0	0	0	0	0	0	0	0	0	0	0	0	0	0	0	0	0	0	0	0	0	0	0	0	0	0	0	0	0	0	0	0
1700064M15Rik	NR_045288	0.3	0.23	0	0	0.2	0.3	0	0.24	0.33	0.13	0.22	0.16	0.94	0.18	0.19	0	0.56	0.25	0.4	0	0	0.13	0	0	0.42	0.16	0	0	0.18	0	0.18	0	0.14	0	0.24	0	0.32	0.15	0.48	0.49	0	0.47	0	0.47	0	0	0.48	0.55
1700065D16Rik	NM_001271569,NR_073361	0	0	0	0.8	0.18	0	0	0.21	0	0	0.19	0	0.41	0	0.25	0	0	0.16	0	0.19	0	0	0	0.2	0	0.56	0.29	0.22	0	0	0.16	0	0.24	0.31	0	0	0	0	0	0.56	0	0	0.13	0	0	0.24	0	0.48
1700065I16Rik	NR_040315,NR_108057	0	0	0.21	0	0	0.08	0.22	0.09	0	0.2	0.09	0.25	1.65	0	0	0	0.22	0.2	0.1	0	0	0	0	0	0	0	0.17	0	0	0	0.14	0.13	0	0	0	0	0	0	0	0	0.26	0	0	0	0.12	0.15	0	0
1700065J11Rik	NR_040526	0	0	0	0	0	0	0	0	0	0	0	0.26	0.43	0	0	0.34	0	0.2	0	0	0	0	0	0.5	0	0	0	0.59	0	0	0.29	0	0	0	0.38	0	0	0	0	0	0	0	0	0	0.24	0	0	0
1700065J18Rik	NR_040468	0	0	0	0	0	0.17	0	0.2	0.56	0	0	0	0.23	0	0	0	0	0	0	0	0	0	0	0	0	0	0	0	0	0	0	0	0.23	0	0	0	0	0	0	0	0	0	0	0	0.26	0	0.27	0
1700065L07Rik	NR_108032	0	0.12	0.28	0	0	0	0	0.12	0	0	0.22	0	2.31	0.18	0	0	0.14	0.39	0.27	0.15	0	0	0	0	0.22	0.16	0	0.26	0	0	0	0.66	0.28	0	0	0	0	0	0	0	0	0	0	0	0	0.2	0	0
1700065O20Rik	NR_045386	0	0	0	0	0	0	0	0.11	0	0	0	0	0	0	0	0	0	0	0	0	0	0	0	0	0	0	0	0	0	0	0.08	0	0	0	0	0	0	0	0	0	0	0.36	0	0	0	0	0	0
1700066B17Rik	NR_040465	0	0	0	0	0	0	0	0	0	0	0	0	0	0	0	0	0	0	0	0	0	0	0	0	0	0	0	0	0	0	0	0	0	0	0	0	0	0	0	0	0	0	0	0	0	0	0	0
1700066B19Rik	NM_001033168	0.32	0.14	0.17	0	0.2	0.14	0.23	0.23	0.24	0	0.29	0.23	0.16	0.48	0.28	0.31	0.17	0.27	0.26	0.04	0.1	0.19	0	0	0	0.04	0.16	0.03	0	0.09	0.02	0.04	0.07	0.13	0	0.04	0	0.1	0.04	0	0.04	0	0.04	0	0	0	0.27	0.07
1700066J03Rik	NR_126543	0.57	0.58	0.18	0	0.26	0.38	0.36	0.46	0	0	0.84	0.21	1.72	0.47	0	0	0.54	0.33	0	0.19	0.17	0	0.4	0.2	0.55	0.2	0	0.64	0.47	0.31	0.12	0.21	0.71	0.23	0	0	1.01	0	0.41	0.21	0.44	0	0.29	0.3	0.39	0.49	0.41	0.35
1700066M21Rik	NM_028546	12.24	8.25	7.61	9.26	13.59	8.91	12.83	11.3	13.28	7.43	8.78	10.23	9.98	18.62	16.22	9.57	10.06	9.39	9.53	5.38	6.19	4.75	2.87	6.34	3.17	8.25	5.15	5.29	6.49	4.96	5.3	6.13	6.09	7.02	7.33	4.54	6.43	4.51	3.81	3.96	2.73	3.49	4.09	4.85	4.61	3.91	3.74	5.47
1700066N21Rik	NR_045924	0	0	0	0	0	0	0	0	0	0	0	0	0.11	0	0	0	0	0	0	0	0	0	0	0	0	0	0	0	0	0	0	0	0	0	0	0	0	0	0.13	0.14	0	0	0	0	0	0	0.26	0
1700066O22Rik	NR_015541	0	0	0	0	0.2	0	0	0	0.11	0	0.07	0	0.35	0	0	0	0.27	0	0.18	0	0.09	0	0	0	0	0	0	0.08	0	0	0	0	0	0	0	0	0	0	0	0.11	0	0.15	0	0	0	0	0	0.54
1700067G17Rik	NR_040471	0	0	0.15	0	0	0	0	0	0	0.69	0.24	0.17	0.43	0	0	0	0.6	0	0.14	0.16	0	0.14	0	0	0	0	0.24	0	0	0	0	0	0.3	0	0	0	0	0	0	0	0	0	0.08	0.26	0.16	0	0	0.3
1700067K01Rik	NM_183097	0.17	0	0.16	1.11	0.7	0.23	0.08	0.34	0	0.44	0.13	0.09	1.45	0.1	0	0.12	0.48	0.07	0.15	0.09	0.08	0.29	0.18	0.28	0.36	0.52	0.38	0.29	0.11	0.28	0.26	0.18	0.47	0.21	0.41	0.09	0.46	0.17	0	0.48	0.67	0.27	0.31	0.14	0.17	0.11	0.09	0
1700067P10Rik	NM_026625	0	0	0	0	0.16	0.08	0.11	0.09	0.26	0.2	0	0	2.03	0.14	0	0	1.12	0.3	0.54	0	0	0	0	0.13	0.17	0.12	0	0.1	0	0.3	0	0.39	0	0	0.38	0	0.51	0.12	0	0	0.54	0.12	0	0.38	0.24	0.31	0.89	0.22
1700069L16Rik	NR_033216	0	0	0	0.58	0	0	0	0	0	0	0	0	0.12	0	0	0	0.13	0	0	0	0.12	0.12	0	0	0	0	0.2	0.12	0.17	0	0.17	0	0	0.16	0	0	0	0.13	0.44	1.05	0.92	1.71	0.7	0.22	0.69	1.58	0.72	1
1700069P05Rik	NR_040527	0	0	0	0	0	0	0	0	0	0	0	0	0	0	0	0	0	0	0	0	0	0	0	0	0	0	0	0	0	0	0	0	0	0	0	0	0	0	0	0	0	0	0	0	0	0	0	0
1700071K01Rik	NM_001033765	0	0	0	0	0	0	0	0.14	0.1	0	0	0	0.08	0	0	0	0	0	0	0	0.08	0	0	0	0	0	0.13	0	0	0.15	0	0	0	0	0	0	0.1	0	0	0	0.1	0	0.05	0.14	0	0	0.21	0
1700071M16Rik	NR_045444,NR_045445	0	0	0	0	0	0.07	0.03	0.03	0	0	0	0	0.03	0	0	0.05	0	0	0.03	0	0	0	0	0	0	0	0	0	0.04	0	0	0.1	0	0	0.06	0	0	0	0	0	0	0.13	0	0	0	0	0	0.07
1700072B07Rik	NR_040727	0	0	0	0	0.15	0	0	0	0.25	0	0.17	0	1.22	0.28	0	0	0	0.19	0.6	0	0	0	0	0	0	0	0.34	0	0	0	0	0	0.21	0	0	0	0.24	0	0	0	0.52	0	0.11	0	0	0.86	0	0
1700072O05Rik	NR_045733	0	0	0	0	0	0	0	0	0	0	0	0	0.13	0	0	0.41	0	0	0	0	0	0	0	0	0	0	0	0	0	0	0	0	0	0	0	0	0	0	0	0	0	0	0	0	0	0	0	0
1700073E17Rik	NR_003625	0.04	0.01	0.05	0	0.03	0.03	0.02	0.02	0.04	0.07	0.01	0.02	0.45	0	0.05	0	0.02	0.02	0.11	0	0	0.05	0	0.04	0	0	0.03	0.05	0.02	0.02	0	0.04	0	0.02	0	0.02	0.08	0	0.15	0.09	0.11	0.09	0.07	0.06	0.08	0.2	0.04	0.07
1700074H08Rik	NR_045296	0	0	0	0	0	0.12	0	0.14	0	0	0	0	0.32	0.22	0	0	0	0	0	0	0	0	0	0	0	0	0.27	0	0	0	0	0	0	0	0	0	0	0	0	0	0	0	0	0	0	0	0.19	0.33
1700074P13Rik	NM_028550	0.06	0.43	0.15	0.6	0.64	0.54	0.82	0.88	0.55	0.76	0.9	0.65	10.65	1.26	0.5	1.12	2.19	0.93	1.95	0	0.19	0.38	0.27	0.24	1.09	0.11	0.5	0.29	0.27	0.69	0.07	1.12	0.6	0.27	0.44	0.17	1.18	0.32	0.3	0.62	0.87	1.05	0.52	0.52	0.45	1.16	1.07	1.23
1700080E11Rik	NM_028562	0	0.25	0.4	2.32	0.59	0.5	0.61	0.6	0	1.85	1.04	1.28	7.43	0.13	0.28	1.09	0.61	0.46	0.97	0.54	0.19	0.74	2.27	0.35	0.61	0.11	0.81	0.18	0.26	0.45	0.33	0.58	0.49	0.13	0.17	0	1.72	0.63	0.12	0.72	0.24	0.17	0.33	1.2	0.22	1.4	0.35	0.2
1700080N15Rik	NR_040500	0	0	0	0	0	0	0	0	0	0	0	0	0.21	0	0	0	0.43	0	0	0	0	0	0	0	0	0	0	0	0	0	0	0	0.22	0	0	0	0	0	0	0	0	0	0	0	0	0	0	0.43
1700080O16Rik	NM_028851	0	0	0	0	0.04	0.04	0	0.05	0	0.11	0	0.2	1.29	0.08	0.08	0	0.06	0.11	0.06	0.13	0.06	0.05	0	0	0	0.06	0.19	0	0.15	0.1	0.04	0	0.11	0.08	0.2	0	0.2	0	0	0	0.07	0.53	0	0	0	0.08	0	0
1700081H04Rik	NR_040693	0	0	0	0	0	0	0	0	0	0	0.06	0	0	0	0	0	0	0	0	0	0.07	0	0	0	0	0	0	0.07	0	0	0	0.09	0.08	0	0	0	0	0	0	0	0	0	0	0	0	0	0	0
1700084C01Rik	NM_001033185	0.44	0.44	0.41	0	0.22	0.21	0.24	0.76	0.14	0.65	0.14	0.48	0.28	0.15	1.07	0.37	0.24	0.16	0.46	0.06	0.11	0.11	0	0.2	0	0.39	0.28	0.27	0.23	0.21	0.23	0.54	0.64	0.23	0.1	0.51	0.07	0.12	0.14	0.14	0.07	0	0	0.3	0.06	0.08	0	0.24
1700084E18Rik	NR_028299	0.69	1.4	1.49	2.45	1.74	1.09	1.55	2.04	1.28	1.19	1.37	1.27	2.93	2.56	0.6	2.32	2.6	1	1.87	0.68	1.41	1.6	2.9	0.74	1	1.48	3.19	2.53	1.42	2.1	1.27	1.8	1.72	1.39	0.37	0.46	2.94	1.15	0.99	0.51	0.53	1.81	1.3	1.11	0.95	1.48	1.97	0.86
1700084F23Rik	NR_045965	0	0	0	0	0	0	0	0	0	0	0	0	0	0	0	0	0	0	0	0	0	0	0	0	0	0	0	0	0	0	0	0	0	0	0	0	0	0	0	0	0	0	0	0	0	0	0	0
1700084J12Rik	NR_033608	0	0	0	0	0	0	0	0	0	0	0	0	0	0	0	0	0	0	0	0.01	0	0	0	0.14	0	0.14	0	0	0	0	0	0	0	0	0	0	0	0	0	0	0	0	0	0	0	0	0	0
1700084M14Rik	NR_126536	0.17	0.88	0.16	2.23	0.24	0.35	0	0.6	0	1.46	0.87	0.57	7.71	1.63	0	1.1	0	0.6	1.11	0.26	0.5	0.72	0.12	0.19	1.94	0.37	2.51	1.1	0.21	1.35	0.12	0.24	0.19	0.32	0	0.39	2.18	0.4	0	0.49	1.23	0.36	0	0.39	0	1.56	0.41	1.62
1700085C21Rik	NR_046045	0	0	0	0	0	0	0	0	0	0	0	0	0	0	0	0	0	0	0	0	0	0	0	0	0	0	0	0	0	0	0	0	0	0	0	0	0	0	0	0	0	0	0	0	0	0	0	0
1700086L19Rik	NR_030733,NR_030734,NR_030735	14.32	12.99	10.81	8.47	16.68	12.88	17.91	13.86	15.4	8.51	12.21	10.66	21.99	20.61	18.1	13.33	11.58	12.65	12.52	0.27	0.71	0.7	0.63	0.25	1.63	0.83	0.74	0.69	0.28	1	0.25	1.5	1.06	0.56	0.18	0	1.83	0.56	4.05	7.66	6.35	3.63	3.74	6.31	4.61	5.04	5.34	5.7
1700086O06Rik	NR_015475,NR_027903,NR_027904	5.69	4.88	6.1	6.93	6.8	5.79	5.22	6.5	4.77	6.31	5.25	5.09	7.49	5.63	4.17	4.37	4.81	5.87	7.33	5.51	4.16	5.36	4.4	5.89	5.22	4.78	5.89	4.54	4.05	6.08	5.17	4.39	4.98	4.59	5.72	4.42	4.3	4.79	6.84	9.23	8.18	10.36	8.61	7.33	7.67	10.66	7.33	5.87
1700088E04Rik	NM_138581	10.56	9.24	7.78	7.59	9.74	8.34	8.67	11.19	10.51	9.31	8.77	7.64	10.51	9.37	6.39	8.6	9.54	8.61	14.23	10.39	6.41	8.33	11.68	7.48	7.41	4.19	10.89	7.7	8.49	8.02	7	6.47	9.06	7.15	9.25	6.27	9.62	6.92	19.27	16.46	18.63	21.39	17.93	20.28	19.85	20.86	17.92	15.8
1700091H14Rik	NR_073362	0.13	0	0.06	0.29	0.31	0.27	0.23	0.16	0.29	0.17	0.24	0.15	3.03	0.32	0.34	0.1	0.12	0.28	0.42	0.07	0.17	0	0	0	0.19	0.18	0	0.17	0.3	0.05	0.16	0.21	0.12	0.08	0	0.2	0.49	0.06	0.2	0.22	0.28	0.38	0.27	0.13	0.72	0.49	0.52	0.39
1700092C02Rik	NR_045467	0	0	0	0	0	0	0	0	0	0	0	0	0	0	0	0	0	0	0	0	0	0	0	0	0	0	0	0	0	0	0	0	0	0	0	0	0	0	0	0	0	0	0	0	0	0	0	0
1700092C10Rik	NR_045931	0	0	0	0	0	0	0	0	0	0	0.13	0	0.31	0.21	0	0	0	0.15	0	0	0.45	0.15	1.08	0.18	0.49	0.9	0.52	0.43	0	0.42	0.63	0.19	0.47	0.21	0.27	0.17	0.18	0.17	0	0	0	0.36	0.35	0	0	0	0	0
1700092E19Rik	NR_045933	0	0	0	0	0	0	0	0	0	0	0	0	0.25	0	0	0	0	0	0.2	0	0	0	0	0	0	0	0.08	0	0.14	0	0.03	0	0	0	0	0	0.24	0	0.18	0.19	0	0	0.09	0	0.06	0.07	0	0
1700092K14Rik	NR_045930	0.26	0.78	0.24	0	0.53	0.35	0.25	1.24	0	0.44	0	0	0.23	0.95	1	0.37	0.48	0	0.69	0	0	0	0	0	0	0	0	0.22	0	0	0	0	0.24	0	0	0	0	0	0	0	0	0	0	0	0	0	0	0
1700092M07Rik	NM_001177347	1.34	0.61	1.49	2.27	0.37	0.73	2.08	0.86	0.3	1.16	1.19	0.9	6.12	1.33	1.04	1.93	2.02	1.63	2.65	1.05	0.7	0	0.93	1.73	1.96	0.58	4.56	1.35	3.97	0.67	0.82	1.21	1.26	0.64	2.16	0.26	3.99	1.35	0	1.76	1.87	2.25	0.82	0.87	0.83	1.03	2.87	2
1700093K21Rik	NM_001110133,NM_026105	0	0.07	0.09	0	0.19	0.25	0.26	0.52	0.23	0.56	0.15	0.1	4.67	0.9	0.12	0.54	0.35	1.02	1.09	0.19	0.16	0.32	0	0.1	0.13	0.48	0.98	0.08	0.26	0.39	0.51	0.94	0.51	0	0.15	0.28	0.69	0.36	0.2	1.03	0.63	1.17	0.38	0.15	0	1.81	0.4	0.69
1700094D03Rik	NM_028567	6.04	2.53	3.08	4.83	5.06	4.82	6.14	5.65	3.07	3.91	4.4	4.65	6.92	3.85	2.76	2.64	2.44	5.37	6.93	2.33	3.07	2.02	3.27	3.83	2.8	6.11	3.44	2.22	2.28	3.22	2.93	3.94	5.16	2.11	2.71	2.25	3.55	2.45	3.36	4.87	2.37	4.44	3.71	3.65	3.1	3.45	3.18	3.48
1700094J05Rik	NR_040580	0	0	0	0	0	0	0	0	0	0	0.07	0	0.09	0	0	0	0	0	0	0	0	0	0	0	0	0.03	0	0	0	0	0	0	0	0	0	0	0	0	0	0	0	0	0	0	0	0	0	0
1700094M24Rik	NR_046049	0	0	0	0	0.1	0	0	0	0	0	0	0	0.26	0	0	0	0	0	0	0	0	0	0	0	0	0	0	0	0	0	0	0	0	0	0	0	0	0	0	0	0	0	0	0.23	0	0	0.62	0
1700095A21Rik	NR_045468	0.09	0.13	0	0	0.12	0	0.08	0	0	0.19	0.19	0	1.45	0.31	0.11	0.13	0.25	0.15	0.08	0	0	0	0	0	0.25	0	0	0	0	0	0	0.28	0.08	0	0.14	0.17	0.46	0	0	0.19	0	0	0	0	0	0.11	0.16	0
1700095B10Rik	NR_040675,NR_040676	0	0	0	0	0.27	0.13	0	0.08	0	0.46	0	0	1.71	0.36	0.25	0	0.65	0	0.18	0	0	0	0	0	0	0.1	0	0	0	0.08	0	0.11	0	0	0	0	0	0.19	0.11	0	0.22	0	0	0	0.2	0.12	0.21	0
1700095J12Rik	NR_126429	0	0	0	0	0	0.08	0.12	0	0	0.11	0	0	0.23	0	0	0	0	0	0.34	0	0	0	0	0	0	0	0.19	0	0	0	0	0	0	0	0	0	0.27	0	0	0	0	0	0	0	0	0	0	0
1700096J18Rik	NR_027883	0	0.17	1.22	0	0.15	0	0	0.35	0	0	0	0	0.4	0	0	0	0	0.19	0.2	0.43	0	0.19	0	0	0.32	0	0.34	0.37	0	0.36	0.13	0	0.2	0	0	0	0.23	0	0.47	0	0	0	0.22	0	0	0	0	0.41
1700096K18Rik	NR_027388	3.09	3.89	5.16	2.18	4.5	3.81	4.48	4.08	3.01	4.11	3.33	3.47	3.49	5.1	3.69	4.74	3.51	4.05	3.42	5.38	5.73	5.6	7.22	7.25	2.93	7.05	5.47	6.68	7.45	5.98	6.31	5.07	5.24	7.21	7.48	5.57	4.44	5.07	1.43	2.54	2.05	1.73	1.44	1.5	1.54	2.47	1.83	2.22
1700097N02Rik	NR_045287	0.11	0.34	0	0	0.08	0.07	0.14	0.09	0	0	0.08	0.24	2.68	0.16	0	0.38	0.42	0.24	0.2	0.33	0.2	0.77	0	0	0.16	0	0.33	0.1	0.27	0.09	0.07	0	0	0.11	0.18	0	0.59	0	0.12	0	0	1.46	0.11	0.48	0.32	0	0.24	0
1700100I10Rik	NR_126548,NR_126549,NR_126550,NR_126551	0	0	0.2	0	0.14	0	0.11	0	0	0.24	0	0.12	0.5	0.39	0	0	0.32	0.11	0	0	0	0.1	0	0.07	0	0	0.18	0.19	0.14	0.09	0	0.12	0.08	0	0	0	0	0.11	0	0	0	0	0	0.18	0	0	0	0.2
1700100L14Rik	NR_045934	0.28	0.11	0	0	0.1	0	0.27	0.11	0	0.24	0.21	0	1.38	0.17	0	0.2	0.13	0	0.25	0	0	0.12	0	0	0	0	0	0	0	0	0.09	0.46	0.13	0	0	0.14	0.15	0.14	0	0.16	0.32	0	0	0	0	0.18	0.3	0.26
1700101E01Rik	NM_001166705	1.6	1	1.94	0	0.69	0.66	1.32	1.36	1.34	1.2	1.04	0.76	0.99	0.97	0.39	1.01	0.95	1.02	1.54	0.1	0.26	0	0	0.11	0	0.1	0.75	0	0.12	0	0	0	0.09	0.12	0.16	0.4	0	0.1	1.3	0.56	0.45	1.58	1.97	0.96	0.92	1.7	0.97	1.12
1700101I11Rik	NR_045270	1.17	2.87	2.05	0.25	2.88	2.79	2.43	1.87	1.3	1.71	1.99	1.27	3.46	4.97	0.91	2.87	3.09	1.49	1.26	0.47	0.41	0.4	1.07	0.5	0.83	0.6	1.41	0.9	1.29	0.68	0.79	0.51	1.29	0.57	1.67	0.47	0.25	0.69	0.5	0.26	0.13	0.18	0.06	0.37	0.24	0.3	0.25	0.65
1700101O22Rik	NR_045045	0	0	0	0	0	0	0	0	0	0	0	0	1.68	0	0	0	0	0	0	0	0	0	0	0	0.45	0	0	0	0	0	0	0	0	0	0	0	0.65	0	0	0.67	0.36	0.8	0	0	0	0	0.98	0
1700102H20Rik	NR_045302,NR_045303	4.01	2.29	4.66	6.92	3.11	2.39	1.7	4.04	1.96	2.82	3.54	1.12	2.29	3.42	3.2	3.62	1.86	1.53	5.65	3.71	3.07	6.33	3.68	4.73	1.1	2.44	3.49	3.8	0.93	1.87	2.16	1.69	2.17	3.03	4.83	3.97	3.47	2.27	4.84	3.85	3.5	5.13	5.27	0.81	3.1	2.9	6.46	4.69
1700102P08Rik	NM_053216	0.25	0.71	0.47	1.45	1.73	1.22	1.42	0.2	0.65	0.87	0.44	0.64	4.37	0.71	1.53	0.36	1.59	1.07	0.3	1.43	0.52	0.65	0.59	0.91	0.71	3.62	1.14	0.72	1.24	0.84	0.98	0.54	2.47	0.93	0.8	1.27	1.71	1.23	1.27	1.6	1.33	1.2	0.74	1.07	1.12	2.09	1.08	1.25
1700104L18Rik	NR_108033	0	0	0	0	0	0	0	0	0	0	0	0	0	0	0	0	0	0	0	0	0	0	0	0	0	0	0	0	0	0	0	0	0	0	0	0	0	0	0	0	0	0	0	0	0	0	0	0
1700105P06Rik	NR_045703	0	0	0	0	0.12	0.12	0	0.42	0	0.15	0.39	0.38	0.32	0.43	0	0.25	0.66	0.15	0	0.17	0	0.3	0	0.19	0	0	0.27	0.45	0.22	0.15	0.32	0	0.32	0.21	0	0.52	0.93	0.35	0.38	0	0.6	0.37	0.18	0.56	0	0	0.38	0.33
1700106J16Rik	NM_028859	0	0	0	0	0	0.05	0.07	0.06	0	0	0	0	0.07	0	0	0.11	0	0	0	0	0	0	0	0	0	0.08	0	0	0	0	0	0.08	0	0	0	0	0	0	0	0	0.17	0	0.08	0	0	0	0	0
1700108F19Rik	NR_015485	0.22	0.08	0	0	0	0.29	0.1	0.09	0.24	0.19	0.16	0	0.19	0.13	0	0	0.61	0.09	0.39	0.11	0	0.09	0	0	0	0	0.16	0	0	0.09	0.2	0.23	0.1	0.26	0	0.11	0	0.11	0	0	0.24	0.11	0	0	0.33	0.14	0	0
1700108J01Rik	NR_015532	0	0	0	1.8	0.29	0	0	0.17	0	0.36	0.47	0.47	5.76	0.78	0	0.31	1	0.18	0.38	0	0	0	0	0	0	0	0	0	0.26	0	0.13	0.23	0.2	0.26	0	0	0.68	0.21	0	0	0.73	0.67	0.11	0.34	0.22	0.54	0.45	0.39
1700109G14Rik	NR_033788	0.24	0.09	0	0	0	0.39	0	0.19	0.13	0.2	0.44	0.39	1.38	0	0.31	0.51	0.78	0.3	0.11	0	0	0	0	0.13	0.5	0.12	0	0.1	0	0.2	0.07	0.26	0.43	0	0	0	0.38	0.46	0	0.13	0.8	0.56	0.18	0.19	0	0.61	0	0
1700109G15Rik	NR_046197	0	0	0	0	0.18	0.18	0	0	0	0	0	0	0	0	0	0	0	0	0	0	0	0	0	0	0	0	0	0	0	0	0	0.6	0	0	0	0	1.13	0	0	0.29	0	0	0	0	0	0	0	0
1700109H08Rik	NM_029843	0.27	0.23	0.37	0	0.18	0	0	0.11	0.15	0	0.1	0	2.43	0	0.34	0.77	0.75	0.36	0.96	0	0.35	0.13	0	0	0.19	0.69	0.4	0.24	0.33	0.59	0.24	0.14	0.86	0.36	0	0	1.13	0.26	0	0.16	0.6	0.7	0.15	0.44	0.14	0.55	0.43	0.49
1700109I08Rik	NR_045936	0	0	0	0	0	0	0	0	0	0	0	0	0	0	0	0	0	0	0	0	0	0	0	0	0	0	0	0	0	0	0	0	0	0	0	0	0	0	0.27	0	0	0	0	0	0	0	0	0
1700109K24Rik	NR_108037	0	0	0.23	0.18	0.17	0.06	0	0.14	0	0	0.19	0.18	0.08	0.21	0.22	0	0	0.22	0.08	0	0.22	0.07	0	0.09	0	0.43	0.25	0.07	0.21	0	0.1	0.09	0.08	0.1	0.13	0.09	0.45	0.08	0.18	0	0	0.04	0	0	0.09	0	0	0
1700110C19Rik	NR_045461	0	0	0	0	0	0.09	0.12	0.21	0	0.11	0.1	0.14	0.35	0	0	0	0	0	0.36	0	0	0	0	0.14	0.19	0.14	0	0.11	0	0.22	0	0	0	0	0	0.13	0	0	0	0	0	0	0	0	0	0	0	0
1700110I01Rik	NR_038059,NR_038059_chr14:3504099_3544338,NR_038059_chr14:3743492_3783730	0.11	0	0.1	0.12	0.33	0.18	0.15	0.04	0	0.37	0.16	0.23	4.62	0.39	0.21	0.31	0.4	0.27	0.58	0	0.05	0.09	0	0	0.23	0.05	0.16	0.05	0.07	0	0	0.23	0.19	0	0	0.05	0.23	0.15	0.06	0.42	0.66	0.23	0.15	0.25	0	0.14	0.46	0.3
1700110K17Rik	NR_040728	0.54	0.1	0.12	0	0.46	0.09	0.25	0.64	1.21	0.7	0.5	0.29	1.58	0.33	0.18	0.19	0	0.12	1.47	0.27	0.24	0.12	0.38	0.14	0.38	0.28	0.2	0.23	0.17	0	0	0.44	0.37	0	0.43	0.54	0	0.13	0.29	0	0	0.07	0.07	0	0.28	0	0	0
1700111N16Rik	NR_033213	0	0	0	0	0	0	0	0	0	0	0	0	0.07	0	0	0	0	0	0	0	0	0	0	0	0	0	0	0	0	0	0.05	0	0	0	0	0	0	0	0	0	0	0	0.04	0	0	0	0	0
1700112E06Rik	NM_028275	4.2	7.96	6.14	5.08	6.12	5.84	4.54	4.75	4.33	4.66	3.96	5	4.32	4.73	3.06	5.48	4.35	6.02	5.18	11.79	12.82	12.4	11.92	10.92	13.1	10.56	16.67	12.57	12.5	12.6	14.16	10.99	13.74	12.05	12.69	12.93	11.92	12.61	26.8	30.96	29.45	34.61	26.29	25.12	28.59	33.77	21.99	28.38
1700112H15Rik	NR_040472	0	0	0	0	0	0	0	0	0	0	0	0	0	0	0	0	0	0	0	0	0	0	0	0	0	0	0	0	0	0	0	0	0	0	0	0	0	0	0	0	0	0	0	0	0	0	0	0
1700112J05Rik	NR_077218	0	0	0	0	0.08	0.09	0.14	0	0	0	0.11	0	0.25	0	0	0	0	0	0.21	0	0	0	0	0	0	0.13	0	0	0	0	0.19	0.14	0	0	0	0	0	0.28	0	0	0.13	0	0	0	0	0.3	0.38	0
1700113A16Rik	NR_045997	17.1	16.74	16.65	22.85	16.67	18.08	17.17	17.08	15.23	13.64	14.9	17.11	17.3	15.48	14.51	18.45	17.41	17.28	17.33	17.99	13.25	16.67	21.35	16.48	15.15	19.34	16.08	15.51	13.86	18.31	14.34	15.13	18.21	16.11	17.4	15.82	17.77	14.57	14.31	20.89	12.29	16.25	14.57	14.44	15.45	13.31	15.52	11.77
1700113H08Rik	NM_029685	0	0	0.06	0	0	0	0.06	0	0	0.29	0.15	0.22	1.34	0	0	0.1	0.06	0.06	0.62	0	0.06	0.35	0.19	0.29	0.29	0.07	0	0.12	0.08	0.06	0.17	0.51	0.12	0.08	0	0.14	0.07	0.07	0.3	0.31	0.08	0.61	0.07	0.32	0.07	1.07	0.15	0.38
1700119H24Rik	NR_040536	0	0	0	0	0	0	0	0	0	0	0	0	0	0	0	0	0	0	0	0	0	0	0	0	0	0	0	0	0	0	0.2	0	0	0	0	0	0	0.16	0.18	0	0	0	0	0	0	0	0	0
1700120C14Rik	NR_045627	7.12	5.4	11.72	11.08	8.69	11.44	6.45	10.19	9.1	9.74	9.94	10.83	12.46	1.94	4.2	7.22	5.91	7.51	17.19	1.56	0.23	0.68	0.91	0.28	0.76	0.57	1.62	0.88	0	0.22	0.16	0.29	0.25	0.32	0	0.77	2.23	0.26	1.99	3.18	5.47	0.69	2.82	0	1.35	0	4.76	2.44
1700120E14Rik	NR_045368	0	0.11	0.09	0	0.1	0.03	0	0	0	0	0.07	0	0.17	0.06	0.12	0.07	0	0.04	0.04	0	0	0.12	0	0	0	0	0	0.08	0.06	0	0	0	0	0	0	0	0.05	0	0.05	0	0	0	0.02	0.07	0	0.06	0	0.09
1700120G07Rik	NR_046050	0	0	0	0	0	0	0	0.08	0	0.09	0	0	0.09	0	0	0	0	0	0	0	0	0	0	0	0	0	0	0	0	0	0	0	0	0	0	0	0	0	0	0	0	0	0.05	0	0	0	0	0
1700120K04Rik	NR_027915	0.72	0.27	0.83	0	0.49	0.24	1.2	0.72	0.6	0.31	0.4	0.98	2.27	0.22	0.23	1.03	0.68	0.46	1.13	0.89	0.16	0.62	0	0.58	0.52	0.76	0.55	0.91	1.77	0	0.66	1.19	1.83	0.65	0.29	0.36	2.1	1.06	0.77	1.19	1.23	0.66	0.74	0.29	0.55	0.69	0.19	0.33
1700121L16Rik	NR_045453	0	0	0	0	0	0	0	0	0	0	0	0	0	0	0	0	0	0	0	0	0	0	0	0	0	0	0	0	0	0	0	0	0	0	0	0	0	0	0	0	0	0	0	0	0	0	0	0
1700121N20Rik	NR_036593	0	0	0	0	0	0	0	0	0	0	0	0	0.08	0	0	0	0	0	0	0	0	0.08	0	0	0.13	0	0	0	0	0	0	0	0	0	0	0	0	0	0	0	0	0	0	0	0	0	0	0
1700122O11Rik	NM_029689	0	0	0	0	0	0	0.12	0	0	0	0	0	0	0	0	0.18	0	0	0	0	0	0	0	0	0	0	0	0	0	0	0	0	0	0.3	0	0	0	0.12	0	0	0	0	0	0	0	0	0	0
1700123I01Rik	NM_001165919	0.11	0	0	0	0	0.11	0.05	0.14	0.13	0.1	0	0.06	0.3	0	0	0	0.11	0.14	0.2	0.06	0.25	0.24	0	0.42	0.16	0.34	0.34	0.15	0.21	0.09	0.17	0.48	0.1	0.21	0.45	0.45	0.12	0.44	0.12	0	0	0	0.09	0	0.12	0.07	0.18	0
1700123K08Rik	NM_029693	0	0	0	0	0	0.06	0	0.07	0.1	0	0	0	0.42	0	0	0	0	0	0.16	0	0	0	0	0	0	0	0	0	0	0	0	0	0	0	0	0	0.09	0	0	0	0	0	0	0	0	0	0	0
1700123L14Rik	NR_003643	0.37	0.95	0.49	1.62	1.39	1.08	1.69	1.57	0.53	2.42	1.63	1.32	27.56	2.06	0.35	2.24	3.02	1.22	3.32	0	0.33	0.97	0.49	0.23	2.03	0.16	1.28	0.64	0.13	0.53	0.1	1.89	0.88	0.2	0.34	0.16	2.28	0.83	1.21	1.73	3.17	0.96	0.64	1.44	0.98	3.21	1.43	2.18
1700123M08Rik	NR_040577	0.87	1.67	1.76	0.75	0.42	0.86	0.82	1.53	0.87	1.42	0.9	1.13	1.63	0.53	0.9	0.75	1.72	1.55	1.25	2	2.22	1.8	3.19	1.31	1.97	0.62	2.48	1.72	1.93	2.45	2.29	1.97	1.59	1.6	2.75	2.52	1.85	2.03	0.94	1.55	0.78	2.15	1.08	1.24	1.42	1.59	0.75	1.94
1700123O12Rik	NR_045185	0	0	0	0	0.12	0	0	0	0	0	0	0	0.46	0.21	0	0	0	0	0	0	0	0	0	0	0	0.18	0	0	0.21	0.14	0	0	0.16	0	0	0	0	0.51	0.18	0	0.2	0	0.18	0.27	0.17	0.44	0.37	0
1700123O20Rik	NM_021437	25.2	22.74	24.18	24.37	22.63	24.12	24.14	25.47	28.16	28.4	19.88	24.38	25.82	27.51	23.77	26.31	23.65	24.24	27.93	22.65	23.91	22.65	24.37	21.87	19.2	19.04	22.74	22.41	23.46	25.65	18.78	19.95	21.1	19.98	21.45	24.65	22.49	21.52	25.38	25.31	27.77	24.46	26.84	24.46	25.98	24.75	26.21	24.38
1700123O21Rik	NR_045799	0	0	0	0	0	0	0	0	0	0	0	0	0	0	0	0	0	0	0	0	0	0	0	0	0	0	0	0	0	0	0	0	0	0	0	0	0	0	0.15	0	0	0	0	0	0	0	0	0
1700124L16Rik	NR_105027	0	0	0.56	0	0.62	0.41	0.58	0.24	0.67	0	0	0.33	1.09	0.37	0	0	0	0	0.54	0.29	0.26	0	0	0.32	0	0	0	0.25	0.74	0.49	0.73	0.34	0.28	0.36	0.48	0.88	0	0.3	0	0.33	0	0.78	0	0	0	1.52	0	0.56
1700125G02Rik	NR_040651	0	0	0	0	0	0	0	0	0	0	0	0	0	0	0	0	0	0	0	0	0	0	0	0	0	0	0	0	0	0	0	0	0	0	0	0	0	0	0	0	0	0	0	0	0	0	0	0
1700125G22Rik	NR_040548	0.11	0.08	0.5	1.17	0.07	0.14	0	0.17	0.12	0.09	0.16	0	0.68	0.13	0.14	0	0	0	0.1	0.44	0.19	0	0.31	0	0	0	0.16	0.19	0	0	0	0	0.1	0.13	0	0.33	0	0.11	0	0.24	0.25	0	0.28	0	0	0.14	0.12	0.4
1700125H03Rik	NR_038181,NR_038189	0	0	0	0	0	0	0	0	0	1.23	0	0	1.21	0.25	0	0.59	0	0.53	0.4	0	0.18	0.18	0	0.22	0.43	0	0.31	0.17	0	0	0.13	0	0	0	0	0	0.22	0.2	0.22	0	0	0	0	0	0	1.31	0	0.38
1700125H20Rik	NM_028589	0.1	0.07	0.18	0.62	0.13	0.19	0.09	0	0	0.33	0.5	0.21	1.88	0.12	0	0.28	0.09	0.65	0.26	0.57	0.34	0.49	0.07	0.1	0.27	0.49	0	0.08	0	0.24	0.12	0.21	0.26	0.35	0.61	0	0.31	0.19	0.31	0.11	0.86	0.15	0.54	0	0.49	0.75	0.61	1.24
1700126H18Rik	NR_040695	0	0	0	0	0	0	0	0	0	0	0	0	0	0	0	0	0	0	0	0.25	0	0	0	0	0	0	0.39	0	0	0	0.31	0	0	0	0	0	0	0	0	0	0	0	0	0.4	0	0	0	0
1700128A07Rik	NR_045938	0	0	0	0	0	0	0	0	0	0.09	0.08	0	0.2	0.13	0	0	0	0.09	0.1	0	0	0	0	0	0	0	0	0	0	0.36	0	0	0.1	0	0	0	0.23	0	0	0	0.12	0	0	0	0	0	0	0
1700128F08Rik	NR_033618	0.41	0.19	0	0	0.11	0.28	0.31	0.27	0.28	0	0.12	0.27	0.45	0.17	0.11	0.12	0	0.07	0.08	0.08	0.07	0.03	0	0	0	0.28	0.09	0.07	0.1	0.07	0.2	0.54	0.23	0.31	0.26	0.08	0.18	0.08	0.27	0.36	0	0	0.04	0.4	0	0	0.36	0
1700129C05Rik	NM_026461	0.17	0.53	0	0	0.48	0.52	0.33	0.9	0.39	0.89	0.32	0.47	10.57	0.74	0.23	1.88	1.23	0.81	2.35	0	0.08	0.6	0	0.37	0.74	0	0.78	0.3	0.21	0.14	0.05	0.94	0.64	0.11	0	0	1.39	0.51	0.38	0.97	0.78	0.78	0.36	0.69	0.35	0.68	0.47	0.32
1810006J02Rik	NR_040439	0	0.17	0	0	0	0.04	0	0.04	0	0	0	0	0	0.06	0	0.08	0.2	0.05	0.05	0	0	0	0	0	0	0.05	0	0	0	0.04	0.03	0	0.05	0	0	0	0	0	0	0	0	0	0	0	0	0	0	0
1810007C17Rik	NR_045472	0	0	0	0	0	0	0	0	0	0	0	0	0	0	0	0	0	0	0	0	0	0	0	0	0	0	0	0	0	0	0	0	0	0	0	0	0	0	0	0	0	0	0	0	0	0	0	0
1810007D17Rik	NR_038136	0	0	0	0	0	0	0	0	0	0	0	0	0	0	0	0	0	0	0	0	0	0	0	0	0	0	0	0	0	0	0.08	0	0	0	0	0	0	0	0	0	0	0	0	0	0	0	0	0
1810008I18Rik	NR_045301	0	0	0	0	0	0	0	0	0	0	0	0	0	0	0	0	0	0.24	0	0	0	0	0	0	0	0	0	0	0	0	0	0	0	0	0	0	0	0.14	0	0	0	0	0.07	0	0	0	0	0
1810009A15Rik	NM_025463,NR_104416	72.15	62.47	67.28	74.96	61.62	57.61	63.16	74.72	62.1	73.39	58.6	63.11	61.88	64.33	70.46	68.57	74.06	61.17	80.35	71.52	68.79	72	53.46	62.61	66.62	53.26	75.53	75.91	71.88	71.09	61.4	48.65	55.58	64.87	72.11	75.5	64.2	52.74	70.86	79.24	76.67	81.06	85.97	69.43	86.77	87.62	83.29	70.95
1810009J06Rik	NM_023707	0	0	0	0	0	0	0	0	0	0	0	0	0	0	0	0	0	0	0	0	0	0	0	0	0	0	0	0	0	0	0	0	0	0	0	0	0	0	0	0	0	0	0	0	0	0	0	0
1810010D01Rik	NR_033626	0	0	0	0	0	0	0	0	0	0	0	0	0	0	0	0	0	0	0	0	0	0	0	0	0	0	0	0	0.12	0	0	0	0	0	0	0	0	0	0	0	0	0	0	0	0	0	0	0
1810010H24Rik	NM_001163473	4.96	5.18	4.57	2.54	5.19	4.5	5.69	6.85	7.75	6.13	4.44	5.73	4.22	7.43	7.44	7.78	7.78	4.14	4.1	1.35	1.78	2.18	1.84	1.72	2.26	1.64	1.89	0.87	3.31	1.68	1.03	1.18	2	1.86	1.6	1.77	0.99	1.64	1.09	1.6	1.14	1.15	0.92	0.8	0.77	1.87	0.9	2.19
1810011H11Rik	NM_001163616	0.31	0.96	0.23	0.81	0.43	0.33	0.35	0.54	0.48	1.22	0.46	0.33	0.44	1.42	0.4	0.9	1.17	0.31	0.45	0.44	0.38	0.32	0.48	0.2	0.61	0.19	0.74	0.11	0.31	0.52	0.23	0.07	0.28	0.3	0.29	0.81	0.33	0.48	0.34	0.28	0.56	0.49	0.39	0.39	0.13	0.32	0.13	0.46
1810011O10Rik	NM_026931	44.64	27.97	42.09	27.56	32.44	36.3	37.51	50.29	28.57	31.06	38.73	48.73	54.6	48.66	32.69	28.66	26.47	49.98	70.83	5.67	5.34	5.88	4.04	7.77	7.29	22.8	22.07	5.75	6.87	6.41	6.8	11.03	16.79	8.03	6.32	5.74	5.29	12.49	25.19	22.12	28.27	11.98	30.79	17.47	19.6	17.01	33.91	22.75
1810012K16Rik	NR_045473	1.61	2.2	0.17	0	2.22	1.33	1.72	2.74	0.4	1.55	1.6	1.18	1.3	2.42	0.47	1.04	1.69	1.54	1.62	0.18	1.1	0.47	0.88	0.19	0.26	0.38	0.82	0.46	0.66	0.89	0.22	0.2	0.17	0.87	0	0.18	1.15	0.18	0.39	0.79	1.03	0.38	0.37	0.58	0	0.46	0.96	0
1810013A23Rik	NR_045427	0	0.18	0.22	0	0	0.33	0	0	0.27	1.04	0	0	0.22	0	0	0.35	0	0	0.22	0.95	0.63	1.67	0.51	1.04	0	0.78	0.37	0.2	1.19	0.4	1.63	1.08	0.68	0	0.39	0.71	1.03	0.72	0.77	0	0	0	0.86	0	0	0.62	0.52	1.35
1810013L24Rik	NM_001081400	36.23	20.06	31.44	18.52	34.7	36.98	39.87	16.01	30.85	18.75	26.38	36.34	38.41	19.42	29.51	18.08	18.48	40.46	16.19	27.49	21.29	23.44	19.98	35.4	19.37	41.62	20.86	24.79	24.51	18.31	32.08	35.09	39.35	31.21	27.14	20.7	32.01	31.88	72.83	50.63	49.04	41.05	56.26	52.19	60.8	46.56	62.74	52.63
1810014B01Rik	NR_015572	3.28	2.82	3.15	1.58	2.65	3.27	2.32	2.88	2.19	3.7	2.6	2.6	2.7	4.59	3.54	2.32	4.04	2.28	3.49	2.45	2.58	2.77	3.52	2.58	1.66	2.97	4.71	2.43	2.85	3.46	2.46	2.19	2.39	2.08	2.96	2.49	2.6	2.6	4.28	5.25	4.52	5.86	4.49	4.57	4.96	5.29	4.7	3.56
1810018F18Rik	NR_038140	0	0	0	0	0	0	0	0	0	0	0	0	0	0	0	0	0	0	0	0	0	0	0	0	0	0	0	0	0	0	0	0	0	0	0	0	0	0	0	0	0	0	0	0	0	0	0	0
1810019D21Rik	NR_040344,NR_040345,NR_040346	36.58	32.69	41.74	46.29	49.76	51.64	48.18	49.22	43.89	38.47	39.35	52.14	59.84	49.59	36.33	36.36	35.11	53.97	53.79	18.34	18.09	16.34	13.62	21.69	19.34	29.06	24.8	19.31	15.31	21.08	17.72	24.37	27.05	17.66	16.82	18.69	26.03	19.01	26	25.08	22.04	32.16	24.58	25.57	24.07	25.18	30.39	25.2
1810020O05Rik	NR_045482	0.18	0.14	0.57	0	0.49	0.7	0.5	1.06	0.39	0.15	0.46	0.38	1.51	0	0	0.38	0.25	0.3	0.8	0.18	0.39	0.31	0.62	0	0.13	0.27	0	0.23	0	0.37	0	0.1	0.32	0.11	0.28	0.09	0.19	0	0.67	0.49	0.1	0.14	0.46	0.14	0.36	1.38	0.66	0.66
1810021B22Rik	NR_040417	1.75	1.68	2.7	2.2	2.01	2.25	1.53	1.29	3.58	1.38	2.39	2.24	2.5	2.14	3.42	1.27	3.59	1.75	2.51	3.06	4.88	3.04	3.29	4.09	2.09	3.36	2.88	3.24	3.42	4.73	3.95	2.08	2.03	2.49	4.19	2.77	3.9	2.3	3.31	7.46	4	6	6.19	5.38	2.39	4.55	5.33	3.81
1810022K09Rik	NM_001099674	305.85	254.45	295.73	346.09	221.09	208.63	207.14	265.59	264.79	269.76	209.78	188.42	234.87	296.64	234.46	239.42	262.53	193.43	321.19	363.15	316.49	361.18	259.85	284.04	293.73	279.91	315.27	317.69	347.35	368.91	292.43	246.3	285.15	293.3	375.1	386.37	297.72	250.71	311.42	403	349.84	337.67	314	317.19	423.15	443.82	298.19	358.78
1810024B03Rik	NM_198630	0.43	0.11	0.13	0.16	0.05	0.14	0.27	0.12	0.24	0.31	0.27	0.16	0.52	0.35	0.47	0.21	0.14	0.12	0.2	0.58	0.51	0.56	0.1	0.62	0.2	1.04	0	0.56	0	0.36	0.4	0.55	0.27	0.8	0.23	0.29	1.16	0.49	0.47	0.73	0.24	0.31	0.19	0.12	0.3	0.09	0.47	0.4
1810026B05Rik	NR_037569	5.68	3.05	5.29	5.19	5.69	4.75	6.03	8.62	6.41	5.83	5.06	5.66	6.52	7.27	5.55	4.6	4.91	4.84	9.08	3.69	2.78	4.06	2.92	2.95	3.97	4.36	9.54	3.71	3.54	3.74	3.43	3.01	4.61	4.53	2.75	2.92	4.65	3.41	4.93	4.44	5.66	3.29	4.92	4.13	5.04	5.5	4.61	5.45
1810026J23Rik	NM_178619	27.16	24.97	25.23	18.02	26.99	26.33	28.71	26.85	26.64	17.64	21.46	26.37	26.9	28.61	29.06	18.91	19.17	24.72	25.4	26.52	26.46	20.88	22.3	27.68	15.95	24.27	29.22	25.25	25.3	20.5	25.06	27.67	26.37	28.59	27.15	22.47	28.13	25.05	41.45	37.48	32.25	34.38	38.25	42.23	29.45	36.25	39.22	38.04
1810030O07Rik	NM_175141	14.56	13.61	13.1	15.74	14.38	11.9	15.47	13.02	15.83	11	11.19	13.33	14.98	19.47	12.43	12.93	10.73	14.31	15.76	11.11	12.5	10.21	13.11	14.38	9.27	24.96	21.74	10.53	13.38	14.73	14.99	15.25	20.57	11.68	15.16	11.39	18.81	13.86	15.23	16.17	12.8	14.4	12.3	15.52	13.93	14.17	14.79	16.42
1810032O08Rik	NR_027819,NR_027820,NR_027821	15.65	15.19	16.16	17.35	21.83	17.91	22.82	15.71	15.96	17.37	14.96	22.8	26.01	16.35	17.88	12.9	13.86	19.12	13.16	13.87	15.75	16.56	15.01	13.4	20.37	17.8	20.53	15.33	14.98	13.23	18.62	16.18	18.24	13.05	13.11	14.11	16.47	17.13	20.37	21.98	28.35	21.57	20.72	19.19	22.01	19.71	19.24	14.36
1810034E14Rik	NR_045798	0.2	0.31	0.09	0	0.14	0.26	0.28	0.16	0.06	0.35	0.19	0.05	0.09	0.24	0	0.07	0.14	0.17	0.18	0.2	0.27	0.04	0	0.11	0	0.05	0.15	0.26	0.31	0.33	0	0	0.09	0.25	0	0.2	0.05	0.24	0.16	0.17	0.06	0.19	0.03	0.08	0.05	0.07	0	0.09
1810037I17Rik	NM_024461	133.24	155.6	150.31	150.47	144.61	148.27	126.23	142.44	136.83	160.66	113.69	129.18	137.9	147.05	137.77	152.42	158.09	127.59	161.49	168.38	149.99	189.86	157.82	143.5	184.28	146	145.36	167.07	157.05	162.71	147.89	172.2	156.43	145.45	145.1	178.98	128.36	146.5	222.97	264.62	291.58	257.32	245.77	231.99	261.9	264.13	230.12	230.32
1810041L15Rik	NM_001163145	0.29	0.22	0.11	0	0.16	0.08	0.15	0.27	0.23	0.28	0.11	0.06	0.17	0.2	0.02	0.11	0.2	0.29	0.27	0.61	0.28	0.18	0.12	0.19	0.27	0.51	0.76	0.34	0.31	0.32	0.41	0.32	0.26	0.52	0.07	0.26	0.26	0.45	2.15	1.96	1.56	2.06	1.48	1.94	1.01	2.21	1.27	2.17
1810043G02Rik	NM_026431	12.74	13.48	14.93	11.49	15.17	15.04	15.2	17.01	14.2	14.51	10.11	12.34	15.59	15.95	13.87	14.63	15.64	15.44	15.15	14.87	15.18	16.08	18.37	14.05	13.95	15.32	16.01	15.53	16.95	17.02	16.01	15.15	17.43	14.3	13.2	14.71	14.99	13.78	16.13	15.32	15.93	18.82	14.26	15.69	12.83	11.29	16.67	16.2
1810043H04Rik	NM_001110242	31.57	44.41	44.61	42.45	44.69	27.41	28.64	59.78	38.59	59.81	42.66	42.55	36.09	42.55	49.29	42.8	47.65	36.39	49.51	53.59	47.43	61.98	62.35	52.53	51.16	31.09	61.52	55.35	39.53	54.28	49.4	39.02	40.76	45.35	40.81	49.56	39.64	37.38	39.57	38.37	48.07	55.39	45.75	31.68	40.63	44.12	46.94	26.71
1810044D09Rik	NR_038153	47.92	51.09	57.82	45.8	51.35	56.84	48.83	62.19	42.24	46.08	48.4	53.86	62.31	48.09	45.72	55	52.53	50.02	67.59	55.35	55.75	63.13	54.25	57	57.41	46.79	57.72	58.58	54.26	66.7	45.58	39.77	55.5	52.8	56.19	48.04	46.41	38.9	53.79	47.53	69.04	74.27	53.43	60.63	56.57	48.57	58.88	49.12
1810046K07Rik	NM_027217	0	0.11	0	0.15	0.05	0	0.13	0	0	0	0	0.08	0.19	0.17	0	0	0	0	0	0	0	0.06	0	0	0	0.14	0.1	0	0.09	0.12	0.04	0.07	0.19	0	0	0	0	0	0.3	0.47	0	0.33	0.07	0.22	0.14	0.09	0.67	0.13
1810053B23Rik	NR_040486,NR_040487,NR_040488,NR_040489,NR_040490,NR_040491	0	0	0	0	0.1	0.05	0.07	0	0	0	0	0	0.14	0	0	0	0	0.13	0	0	0	0	0	0	0	0	0.11	0	0	0	0	0	0	0	0	0	0	0	0.23	0	0	0	0.04	0.13	0.08	0.2	0	0
1810055G02Rik	NM_028077	16.92	16.38	17.04	15.03	14.25	15.8	18.54	11.74	20.76	15.3	12.74	17.6	20.05	14.61	14.72	17.18	13.1	16.42	12.96	13.85	15.42	12.24	13.82	16.24	9.4	13.84	11.06	14.34	16.76	14.05	12.49	15.75	13.24	14.28	17.32	14.24	13.93	14.09	14.65	15.77	14.51	14.27	13.62	17.05	12.36	12.61	16.99	17.23
1810058I24Rik	NR_015608,NR_027875	61.02	79.56	66.18	55.08	51.77	63.9	56.04	74.27	65.47	73.19	50.4	58.38	60.31	60.71	50.81	72.06	68.74	60.88	74.83	82.26	80.49	86.88	91.53	57.61	87.54	61.12	72.67	85.54	91.64	99.6	65.68	62.81	72.5	82.23	69.15	92.05	60.61	61.02	59.26	55.78	71.14	78.2	70.42	64.08	65.63	68.87	62.25	62.14
1810062G17Rik	NM_028183	2.05	0.79	0.57	1.1	0.91	1.7	1.64	1.31	0.8	1.23	1.29	1	1.38	0.75	0.27	1.18	1.45	0.79	1.3	3.18	2.98	1.95	2.31	3.86	4.51	2.64	2.47	3.34	3.54	3.92	3.34	2.33	2.45	4.52	3.42	2.87	2.3	3	1.99	1.37	2.09	1.62	1.7	1.63	1.88	2.8	2.42	2.1
1810062O18Rik	NR_033571	0.9	0.83	0.23	2.17	0.35	0.92	0.72	0.5	0	0.11	0.65	0.82	1.13	0.92	0.54	0	1.07	0.43	0.59	0.26	0.79	1.66	0.09	0.68	0.79	0.91	1.14	0.43	1.09	1.25	0.54	0.96	0.69	0.31	0.8	0.81	0	0.99	1.83	0.56	1.43	0.86	1.01	0.8	1.16	0.33	0.41	0.23
1810064F22Rik	NR_027981	35.46	33.01	35.23	30.58	38.83	34.41	32.66	44.18	32.58	33.47	28.84	30.43	33.99	42.57	30.56	32.65	36.8	34.73	42.71	9.46	8.68	6.25	5.04	7.98	4.78	8.22	6.58	10.64	8	6.42	9.31	7.1	7.66	9.68	8.56	7.75	10.41	6.46	5.35	5.15	6.38	3.37	7.08	4.09	1.96	1.54	10.08	5.69
1810065E05Rik	NM_027239	0	0	0	0.87	0	0	0	0	0.11	0.35	0	0	0	0	0	0	0	0	0	0.4	0.09	1.05	0.28	0.43	0.14	0.21	3.19	0	0	0.5	0.56	0.33	0.28	0.12	0.16	0.1	0	0.39	22.12	31.15	32.62	26.67	16.89	23.27	18.03	27.58	22.29	27.17
2010001E11Rik	NM_001163503	0.47	0.28	0.17	0.43	0.42	0.28	0.55	0.19	0.79	0.07	0.15	0.69	0.62	0.22	0.49	0.09	0.26	0.25	0.34	0.14	0.47	0.12	0.31	0.54	0.14	0.23	0.54	0.16	0.39	0.21	0.42	0.47	0.39	0.24	0.35	0.52	0.14	0.59	0.47	0.31	0.29	0.11	0.27	0.48	0.3	0.12	0.34	0.27
2010002M12Rik	NM_053217	0.86	0.15	0.1	0	0.02	0.12	0.15	0.41	0.09	0.07	0.02	0.21	0.09	0.19	0.19	0.04	0.05	0	0.33	0.57	0.31	0.28	0.24	0.29	0.26	0.39	0.74	0.23	0.13	0.32	0.29	0.23	0.36	0.44	0.46	0.19	0.23	0.23	3.27	4.34	2.75	3.29	2.63	4.08	2.78	3.2	3.04	3.83
2010003K11Rik	NM_027237	0.39	0.12	0.15	0.51	0.49	0.78	0.67	0.06	0.44	0.47	0.06	0.51	0.92	0.57	0	0.91	0.97	0.4	0.14	0.71	0.84	0.41	3.35	1.44	1.23	1.61	1.18	0.14	2.04	4.6	1.36	2.21	3.11	0.29	1	1.9	0.84	1.61	0.17	0.26	0	0.83	0.04	0.63	0.32	0.62	0.08	0.44
2010005H15Rik	NM_029733	0	0	0	0	0	0	0	0	0	0	0	0	0	0	0	0	0	0	0	0	0	0	0	0	0	0	0	0	0	0	0	0	0	0.22	0	0	0	0	0	0	0	0	0	0	0	0	0	0
2010009K17Rik	NR_040609	0	0.26	0	0	0.35	0.34	0.65	0.14	0	0.44	0.13	0	0	0.21	0	0.74	0	0	0.31	0.17	0	0.29	0.24	0	0.49	0.36	0.52	0	0	0.28	0.31	0	0	0.41	0	0.17	0	0	0	0	0	0	0	0	0	0	0	0
2010010A06Rik	NR_045393,NR_045394	0	0	0	0.88	0.38	0	0	0.36	0	0.32	0	0.15	0	0.19	0	0	0.13	0.23	0.49	0	0	0	0	0	0	0	0	0	0	0	0	0	0	0	0	0	0	0	0	0	0	0	0.08	0	0	0	0	0
2010012O05Rik	NM_025563	17.23	14.89	14.11	15.21	14.55	14.47	15.6	14.91	16.27	13.27	12.08	14.25	15.23	17.02	17.22	14.15	13.99	15.29	16.56	13.21	12.12	11.08	12.62	11.41	9.96	10.48	16.03	11.11	12.07	11.32	11.81	10.14	11.13	14.82	10.08	9.6	11.21	11.53	23.23	24.36	21.91	21.47	23.39	23.34	22.52	23.37	24.25	22.84
2010016I18Rik	NR_033207	0	0.1	0.11	0	0.12	0.16	0	0.14	0.15	0	0	0.13	0.1	0.21	0.08	0	0	0	0	0.12	0.05	0.25	0.13	0.38	0.08	0	0.09	0.11	0.07	0.15	0.22	0	0	0.07	0.19	0.12	0.07	0.06	0	0.13	0.07	0	0.06	0.09	0	0.08	0	0
2010106C02Rik	NR_045435	0	0	0	0	0	0	0	0	0	0	0	0	0	0	0	0	0	0	0	0	0	0	0	0	0	0	0	0	0	0.24	0	0	0	0	0	0	0	0	0	0	0	0	0	0	0	0	0	0
2010106E10Rik	NM_001168590,NM_026333	0	0	0	0	0	0	0	0.06	0	0	0	0	0	0	0	0	0	0	0	0	0	0	0	0	0	0	0	0	0	0	0.18	0	0	0	0	0.29	0	0	0	0	0	0	0.11	0	0	0	0	0
2010107E04Rik	NM_027360	555.27	595.64	567.58	481.8	434.62	472.85	416.6	519.39	435.5	568.77	406.21	402.2	464.73	482.68	430.63	560.57	522.2	438.96	606.36	541.15	552.27	643.46	602	379.31	549.47	393.93	521.46	560.02	510.33	603.41	434.13	381.52	439.07	415.98	461.29	559.87	490.35	451.62	466.59	537.24	504.39	493.06	471.57	436.92	586.25	493.83	493.63	505.1
2010107G12Rik	NM_001025573	1.17	0.9	0.73	0	1.23	1.12	1.21	1.23	0.93	1	0.37	0.94	1.27	0.45	0.11	0.66	0.28	1.24	2	1.26	1.11	2.49	1.69	1.98	1.12	0.97	7.92	1.23	1.13	1.5	3.52	3.84	1.33	1.65	1.06	1.39	1.7	2.66	28.01	26.58	22.52	29.68	25.49	30.48	23.94	30.97	20.86	26.99
2010107G23Rik	NM_027251	7.28	7.41	7.29	9.44	8.63	8.64	9.35	9.33	7.74	8.77	7.49	7.85	8.24	8.53	7.71	7.88	6.89	8.95	9.62	9.71	8.8	8.96	9.61	9.02	10.85	7.66	9.79	12	9.49	7.9	8.37	11.18	10.95	8.58	10.52	10.18	9.13	9.08	7.84	7.24	5.12	7.17	7.16	6.39	6.36	7.76	7.32	6.71
2010109A12Rik	NM_029363	0	0	0	0	0.61	0	0	0.14	0	0.15	0	0	0	0	0	0	0	0	0.32	0.18	0	0	0	0	0	0	0	0.3	0	0	0	0.2	0.33	0	0	0	0	0.18	0.19	0	0.2	0	0.27	0	0	0	0	0
2010109I03Rik	NM_025929	0.1	0.07	0.18	0	0.1	0	0.05	0.04	0	0.04	0.04	0	0.39	0.06	0	0	0	0	0.22	0.43	0.3	0.21	0.33	0.36	0.13	0.44	0.93	0.37	0.41	0.29	0.74	0.72	0.75	0.31	0.15	0.63	0.05	0.42	0.05	0.09	0	0	0.05	0.15	0.05	0.06	0	0.23
2010111I01Rik	NM_001289924,NM_001289926,NR_110520,NR_110521	18.58	21	15.41	22.01	19.94	20.43	20.24	21.14	19.41	26.68	17.56	20.23	21.98	23.14	20.19	23.34	22.8	20.57	25.41	17.1	19.45	17.46	17.8	14.66	20.99	20.12	28.45	17.97	17.88	19.05	16.89	17.68	21.96	17.57	16.77	16.44	16.67	17.28	20.02	21.2	19.71	23.36	21.81	23.35	22.51	24.27	20.5	22.69
2010204K13Rik	NR_027924,NR_027925	0.94	2.16	0.61	3.03	0.89	0.57	0.68	0.75	0.39	1.81	1.14	0.49	0.48	1.21	0.92	2.33	0	0.59	2.71	0.53	0.6	0.77	0.99	0.37	0.97	0.56	0.86	1.17	0.87	1.17	0.14	1.17	0.31	1.51	1.13	0.68	1.78	0.11	0.19	0.45	0.61	0.19	0.55	0.59	1.27	0.69	0.76	0.75
2010300C02Rik	NM_028096	21.69	21.78	24.05	18.45	25.34	27.78	32.67	25.33	28.25	16.66	19.18	28.58	30.3	27.25	21.8	17.7	17.33	30.11	26.89	9.65	12.9	7.41	10.72	13.13	6.26	13.66	19.38	8.91	13.38	10.61	12.89	17.05	14.46	11.86	16.38	10.6	11.88	12.66	36.74	31.41	21.96	28.04	29.36	34.2	18.95	24.76	30.44	30.83
2010308F09Rik	NR_045429,NR_045430	0	0	0.78	0	0.29	0.14	0	0.34	0.23	0.54	0.47	0.23	0.19	0.26	0	0.3	0.59	0.18	0	0.41	0.55	0.18	0	0.23	0	0	0	0.35	0.26	0	0.51	0.23	0	0	0.67	0.21	0.67	0	0.22	0	0	0.99	0.11	0.67	0.43	0	0	0
2010310C07Rik	NR_045169	0.11	0	0	0	0.15	0.07	0.1	0	0	0	0.16	0.12	0.1	0	0.29	0.16	0.21	0	0	0	0	0.58	0	0.12	0	0.23	0	0	0	0	0.41	0	0.1	0.14	0	0	0.24	0.11	0	0	0.25	0.35	0.46	0.35	0.23	0	0	0
2010315B03Rik	NM_001243117,NM_001243118,NM_001243119	12.5	8.67	9.47	6.54	10.93	10.86	11.23	12.01	12.93	10.29	10.26	13.26	12.2	15.33	10.68	10.5	11.52	14.64	15.04	19.12	16.84	12.49	10.4	16.5	6.81	16.71	21.34	16.72	16.28	15	15.1	15.9	15.91	18.25	19.37	15.31	16.27	15.41	14.06	13.68	13.13	10.7	13.52	15.23	12.23	14.94	13.92	15.31
2010320M18Rik	NR_029440	38.3	38.92	37.41	34.41	31.21	36.95	33.06	46.88	28.53	41.15	32.45	39.43	36.91	38.2	32.51	41.29	37.05	34.71	46.66	42.96	42	49.23	45.25	37.6	54.88	42.86	50.14	44.55	39.29	48.52	36.12	41.1	42.6	45.14	43.05	42.5	40.38	36.12	49.48	59.72	65.08	65.39	56.87	45.4	58.34	62.36	49.73	50.79
2200002D01Rik	NM_028179	0.96	2.22	0.9	2.89	2.79	1.3	2.96	2.65	2.8	3	2.29	2.34	1.4	2.85	2.76	2.23	2.73	1.83	2.27	2.11	3.56	3.35	3.12	1.25	4.23	2.26	3.25	1.64	3.1	3.86	3.21	2.14	2.34	2.58	1.86	1.93	1.85	4.99	0.42	1.49	0.67	2.03	0.69	0.62	1.19	0.5	0.21	0
2200002J24Rik	NM_026961	0	0.24	0.44	0.34	0.65	0.63	0.75	0.51	0.18	0.14	0.82	0.52	0.85	0.58	1.02	1.37	1.49	0.27	0.43	2.2	0.42	0.82	1.55	0.85	1.81	0	0.48	1.75	0.39	0.92	0.58	0.69	0.73	1.92	0.76	0.63	0.34	0.31	1.36	0.87	1.26	0.08	0.89	0.25	1.13	1.63	0.68	1.47
2210010C04Rik	NM_023333	0	0	0	0	0	0	0	0	0	0	0	0	0	0	0	0	0	0	0	0	0	0	0	0	0	0	0	0	0	0	0	0	0	0	0	0	0	0	0	0	0	0	0	0	0	0	0	0
2210011C24Rik	NM_001291292	0.41	0	0	0	0.21	0.14	0.1	0.25	0.23	0.35	0.15	0	0.74	0.12	0.13	0.3	0.68	0.53	0.09	0.31	0.82	0.27	1.16	0.55	0.44	0.95	0.47	0.53	0.25	0.43	0.32	0.45	0.76	0.13	0.82	0.52	0.55	0.3	0.78	1.26	1.86	3.04	1.39	0.16	0.84	0.67	1.55	0.19
2210013O21Rik	NM_027327	41.66	49.5	43.74	54.96	36.59	40.61	40.08	45.63	44.29	55.96	30.18	37.94	38.94	41.89	44.26	51.58	41.97	42.44	47.25	40.17	43.37	41.18	44.3	26.63	40.62	25.55	40.12	37.26	38.45	46.75	35.64	21.74	28.48	35.5	36.7	37.25	35.17	32.22	55.11	60.37	64.5	63.44	55.86	64.87	61.78	61.27	58.27	60.04
2210015D19Rik	NR_015577	10.67	10.42	9.92	8.97	10.06	10.79	10.84	10.96	12.01	10.22	8.2	9.47	10.72	13.06	10.24	10.96	11.31	10.44	11.88	7.43	9.63	6.23	9.72	6.83	7.48	6.18	10.15	7.54	8.12	7.78	7.16	6.64	8.12	7.12	7.39	7.98	6.58	7.28	8.63	7.98	8.78	7.64	7.37	9.27	6.48	8.13	8.83	8.04
2210016F16Rik	NM_027335	23.51	26.73	22.06	23.96	23.58	21.96	22.82	29.01	23.6	23.72	21.84	24.07	23.47	27.52	23.14	22.11	25.45	24.93	29.36	13.84	14.41	14	13.37	13.7	14.17	11.72	19.41	12.71	12.28	17.46	14.43	12.81	13.49	14.19	12.23	12.94	13.22	13.02	32.27	29.53	27.44	29.92	34.05	28.27	27.07	30.83	31.25	27.64
2210016L21Rik	NM_028211	29.07	29.66	26.41	32.75	31.91	25.28	26.4	31.1	28.05	29.78	24.57	28.85	24.96	32.05	33.25	30.11	30.57	26.88	23.21	24.47	26.7	29.19	29.14	24.27	26.66	23.64	33.08	29.79	25.05	28.98	23.27	22.17	26.9	28.4	25.05	25.04	24.32	26.41	26.91	25.88	27.97	29.92	27.12	27.2	27.35	28.5	27.64	25.01
2210018M11Rik	NM_172280	5.6	6.05	4.82	5.7	6.77	5.47	9.51	3.82	9.58	4.17	5.97	8.66	7.18	6.59	6.95	7.17	3.89	8.21	4.02	4.08	5.6	2.01	3.64	6.07	2.33	5.89	5.42	2.62	5.8	2.79	4.45	6.38	5.18	4.39	5.95	3.34	5.04	5.94	6.7	6.11	4.12	3.91	4.24	6.87	4.05	4.41	5.68	6.88
2210019I11Rik	NR_038157	0	0	0	0	0	0	0	0	0	0	0	0	0	0	0	0	0	0	0	0	0	0	0	0	0	0	0	0	0	0	0	0	0	0	0	0	0	0	0	0	0	0	0	0	0	0	0	0
2210039B01Rik	NR_044985	3.82	3.68	3.74	4.46	4.51	4.58	4.65	3.85	4.93	3.38	4.54	3.79	5	3.31	3.75	2.89	2.88	5.4	6.38	3.76	3.9	3.82	2.5	4.8	3.52	5.83	5.71	4.15	3.53	4.47	3.55	4.16	4.9	4.03	4.65	3.2	4.22	3.62	7.02	7.17	4.83	7.47	7.12	6.24	6.54	5.46	8.44	4.57
2210404O09Rik	NM_001256493	5.41	3.14	2.56	2.91	4.19	4.2	2.67	5.13	4.81	3	4.24	4.01	4.51	4.83	3.27	4.12	4.32	5.43	5.28	3.2	2.49	2.04	1.98	3.09	1.43	1.94	5.33	2.33	2	2.37	2.85	2.18	2.01	1.9	2.85	2.88	3.19	3.76	2.02	2.98	2.3	2.78	2.54	3.04	1.95	2.17	1.95	3.27
2210406O10Rik	NR_126488,NR_126489,NR_126490	1.68	1.64	0.93	3.31	2.26	1.79	2.05	1.1	0.51	2.01	1.58	1.79	2.36	1.77	1.26	1.7	1.9	1.13	2.73	3.6	3.79	2.61	1.69	2.61	2.27	3.45	3.22	2.95	2.02	2.39	2.81	1.93	2.76	2.89	1.16	4.66	2.88	2.64	1.89	1.12	2.22	1.93	1.28	1.89	1.36	2.29	2.61	0.98
2210407C18Rik	NM_144544	0.11	0.33	0.49	0	0.44	0.28	0.2	0.43	0.35	0.09	0.08	0.23	0.19	0.13	0.42	0	0.2	0.36	0.19	0.21	0	0.09	0	0	0.15	0	0.32	0.09	0	0	0.13	0	0.1	0.13	0.17	0.11	0.11	0.21	1.49	1.9	2.41	1.96	1.93	1.53	1.96	2.36	1.94	0.79
2210408F21Rik	NR_040257,NR_040258,NR_040259,NR_040260,NR_040261,NR_040262	4.75	5.74	4.99	5.36	5.99	4.99	6.4	5.96	8.53	7.32	5.59	7.05	7.2	9.15	6.28	11.52	12.4	5.58	6.42	16	13.79	13.89	9.46	15.06	16.14	9.84	16.56	14.56	12.11	14.86	13.44	19.46	11.78	12.76	14.68	20.78	12.77	16.51	8.54	7.14	7.16	7.34	6.48	7.33	9.99	8.31	8.29	9.05
2210408I21Rik	NM_001081353,NM_001145676	4.89	4.41	2.97	1.88	3.61	3.35	4.05	3.63	5.22	3.27	3.39	4.21	4.46	3.53	4.1	3.68	3.15	4.15	4.21	4.36	4.35	2.14	2.32	5.09	2.48	5.7	4.57	3.95	4.65	4.63	4.28	5.4	4.68	5.32	6.12	4.34	5.61	5.76	8.78	7.52	6.75	5.08	6.07	7.63	6.35	5.97	8.08	8.11
2210409D07Rik	NR_045360	0	0	0	0	0	0	0	0.17	0	0	0	0	0	0	0	0	0	0	0	0.21	0	0.19	0	0	0	0	0	0	0	0	0.13	0.24	0.2	0	0	0	0.23	0	0.47	0.71	0	0	0.11	0.35	0.44	0.56	0	0.81
2210409E12Rik	NR_003492	0.27	0	0.26	0	0.42	0.2	0	1.14	0.63	0	0.83	0	0.26	0	0.35	0	1.02	0.24	0.52	0.52	0.51	0.97	0	0.61	0	0	0	0.47	0	0.24	0	0.33	0.51	2.28	0	0.53	0.61	0.54	0	0.59	0	2.12	0.16	0	0.28	0	0.58	0
2210414B05Rik	NR_040643	0	0	0	0	0	0	0	0	0	0	0	0	0	0	0	0	0	0	0	0	0	0	0	0	0	0	0	0	0	0	0	0	0	0	0	0	0	0	0	0	0	0	0	0	0	0	0	0
2210416O15Rik	NR_045499	0.49	1.59	0.67	0.92	1.38	0.8	0.57	1.89	0.81	1.04	1.4	1.31	0.81	1.76	0.79	0.61	1.67	1.13	1.31	1.22	1.77	1.67	2.66	2.22	1.03	1.6	2.27	2.31	1.57	1.11	1.53	1.04	1.11	2.91	1.73	2.32	1.75	1.47	0.66	0.27	0.14	0.48	0.48	0.38	0.25	0.56	0.46	0.11
2210417A02Rik	NR_028285	0	0	0	0	0	0	0	0.14	0	0	0	0	0	0	0	0	0	0	0	0	0	0	0	0	0	0	0	0	0	0	0	0	0	0	0	0	0	0	0	0	0	0	0	0	0	0	0	0
2210420H20Rik	NR_045389	0	0	0	0	0	0.1	0	0	0	0	0	0	0	0.19	0.64	0	0	0	0	0	0	0	0.11	0	0.44	0.16	0	0	0	0	0	0	0	0	0	0	0	0	0	0	0	0	0	0	0.31	0	0	0
2300002M23Rik	NM_175148	0.15	0.17	0.14	0	0.1	0.24	0.07	0.24	0.25	0.32	0.33	0.08	0.13	0.09	0.19	0.11	0.35	0.12	0.66	0.3	0	0.44	0	0.24	0	0	0.77	0.06	0.09	0.06	0.86	1.11	0.07	0	0	0.15	0	0.21	23.02	22.9	24.29	32.1	16.95	22.31	18.18	22.89	24.09	16.13
2300003K06Rik	NM_001195383	0	0	0	0	0	0	0	0	0	0	0	0	0	0	0	0	0	0	0	0	0	0	0	0	0	0	0	0	0	0	0	0	0	0	0	0	0	0	0	0	0	0	0	0	0	0	0	0
2300005B03Rik	NM_001081961	0	0	0	0	0.15	0.43	0	0	0	0	0	0	0	0	0	0	0	0.18	0	0.42	0	0	0.75	0	0	0	0	0	0	0.71	0	0	0.2	0	0	0	0	0.43	0	0	0	0.78	0.22	0	0	0.55	0	0
2300009A05Rik	NM_027090	20.27	16.79	18.18	18.99	18.92	13.39	17.5	26.62	17.58	25.37	19.38	22.24	18.19	26.21	23.64	19.32	26.61	21.02	24.42	19.71	19.53	25.83	15.63	18.57	19.88	13.7	21.32	20.05	21.46	24.47	18.81	13.27	19.85	20.2	16.72	25.19	19.93	16.7	26.38	25.86	23.39	27.88	30.22	19.62	21.96	39	29.21	23.71
2310001H17Rik	NR_040265,NR_040266,NR_040268	5.29	3.9	4	4.02	7.12	4.77	3.24	5.55	7.32	8.19	6.69	3.72	4.59	4.77	4.08	3.68	5.57	3.82	4.39	9.81	9.36	7.5	14.43	10.18	7.87	6.97	12.53	10.45	6.8	12.43	8.48	8.17	9.21	7.86	8.78	10.1	10.23	8.33	11.05	12.02	16.25	13.62	10.97	10.63	12.65	12.96	11.07	10.02
2310001K24Rik	NR_028122	0.22	0	0.2	0	0	0	0	0	0	0	0.16	0	0	0	0	0	0	0	0	0	0	0	0	0	0	0	0.33	0	0	0.36	0	0	0.2	0	0	0	0.23	0.22	0	0	0	0	0.12	0	0.22	0	0	0.4
2310002D06Rik	NR_045490	0	0	0	0	0	0	0	0	0	0	0	0	0	0	0	0.28	0	0	0	0	0	0	0	0	0	0	0	0	0	0	0	0	0	0.47	0	0	0	0	0	0	0	0	0	0	0	0	0	0
2310002F09Rik	NR_077063	0	0	0	0	0	0	0	0	0	0	0	0	0	0	0	0	0	0	0	0.07	0.03	0	0	0	0	0	0	0.03	0.04	0	0.02	0	0	0	0	0	0	0	0.04	0	0	0	0	0	0.04	0.09	0	0
2310002L09Rik	NM_027104,NM_027981	0	0	0	0	0	0	0	0	0	0	0	0	0	0	0	0	0	0	0	0	0	0	0	0	0	0	3.15	0.25	0	0	0	0	0	0	0	0	0	0.28	0	0	0	0	0	0	0	0	0	0
2310003H01Rik	NM_027980	2.59	3.92	2.72	3.43	3.92	3.77	4.69	4.13	4.12	3.77	2.64	4.35	5.75	4.4	3.89	4.73	3.25	4.09	4.41	3.7	4.88	3.01	5.13	4.27	2.92	4.11	6.88	4.03	4.96	5.28	3.79	4.92	3.71	4.56	5.6	4.04	4.22	3.96	6.42	5.96	4.38	6.3	5.55	8.24	3.88	4.74	5.81	5.96
2310005A03Rik	NR_040634	0	0	0	0	0	0	0	0	0	0	0	0	0.12	0	0	0	0	0	0	0	0	0	0	0	0	0	0	0	0	0	0.04	0	0	0	0	0	0	0	0	0.07	0.15	0	0.1	0	0.07	0	0.07	0
2310005E17Rik	NR_045498	0	0	0	0	0	0	0	0	0	0	0	0	0	0	0	0	0	0	0	0	0	0	0	0	0	0	0	0	0	0	0	0	0	0	0	0	0	0	0	0	0	0	0.08	0	0	0	0	0
2310007B03Rik	NM_001159940,NM_172411	0.55	0.27	0.4	1.11	0.22	0.51	0.62	0.44	0.48	0.37	0.56	0.38	0.32	0.09	0.41	0.23	0.11	0.43	0.53	0.95	0.76	1.02	0.7	1.31	0.72	1.55	1.64	0.68	0.77	1.11	0.92	0.96	1.14	0.68	1.49	0.75	0.84	0.95	0.38	0.35	0.22	0.06	0.33	0.19	0.44	0.31	0.46	0.22
2310007L24Rik	NM_029345	2.03	0.83	1.32	3.08	0.41	0.95	1.24	2.96	1.06	1.74	1.33	0.78	0.97	0.58	2.33	0.86	0.9	1.53	5.71	0	0	0	0	0	0	0	0	0.2	0	0	0.07	0	0	0	0	0.12	0.13	0	0	0	0	0.06	0	0	0.12	0	0	0
2310008N11Rik	NR_045904	0.86	0.39	0.16	0	0	0.12	0.16	0.41	0	0.59	0.26	0	0	0.21	0	0	0.16	0	0	1.02	1.81	4.02	3.38	2.22	0.99	1.09	6.81	0.73	1.06	2.28	1.37	1.32	0.32	2.3	0.82	2.22	2.2	1.7	19.98	26.97	28.13	34.78	24.94	20.39	36.11	37.54	21.75	19.2
2310009A05Rik	NR_040377	40.09	34.83	41.29	27.29	33.77	28.08	29.92	44.8	30.97	45.11	35.29	30.41	34.62	43.24	40.44	36.36	38.63	32.25	46.67	40.57	38.36	36.07	31.52	36.83	42.74	30.6	41.92	41.36	29.35	45.41	36.12	25.92	37.6	41.19	33.31	39.27	36.84	34.57	46.41	58.13	50.59	56.69	54.16	50.79	63.38	63.12	47.79	56.64
2310009B15Rik	NM_001081226	17.77	21.29	27.13	32.65	23.05	15.25	14.56	22.03	22.46	21.15	19.63	22.32	19.77	19.3	20.9	26.93	24.14	24.47	27.37	40.07	32.88	46.72	36.31	38.35	38.97	27.12	34.34	40.11	39.31	37.27	34.48	32.46	30.18	31.54	39.55	30.36	32.17	28.82	41.25	33.93	42.68	46.79	41.45	43.75	34.92	37.05	38.91	32.21
2310010J17Rik	NR_046006,NR_046007	17.14	27.59	12.98	27.3	18.46	14.9	12.27	24.89	15.6	26.43	15.33	17.07	18.9	25.65	15.65	20.93	23.52	14.74	22.02	23.5	18.77	19.86	26.25	18.55	13.36	18.7	18.72	23.73	15.93	21.8	14.16	17.25	25.52	24.25	13.43	16.55	16.29	12.44	25.11	21.43	16.26	18.72	24.78	14.16	21.29	22.69	27.92	10.54
2310011J03Rik	NM_025521	24.2	36.83	26.32	26.72	26.38	26.08	26.35	33.27	30.69	32.98	22.4	27.67	28.08	33.63	28.81	35.01	32.52	26.5	28.56	23.31	25.83	27.94	27.9	22.15	22.99	19.74	29.48	24.26	25.9	29.49	22.06	20.78	21.63	22.78	25.37	23.25	21.6	22.91	26.65	26.73	31.06	36.43	28.42	30.89	26.93	28.19	28.05	29.99
2310014L17Rik	NM_029809	25.79	22.09	27.45	16.15	24.91	25.65	31.04	19.9	23.39	16.66	20.88	26.92	26.29	21.98	24.07	19.54	16.95	26.27	19.18	11.48	12.06	8.83	9.3	9.89	6	11.67	13.44	11.1	11.63	9.24	11.12	17.45	8.46	12.99	10.67	8.94	12.05	10.46	20.89	13.43	17.19	16.04	17.87	14.48	14.88	11.86	23.28	16.54
2310015A10Rik	NR_033514	3.76	3.96	3.24	2.88	4.38	3.34	3.82	4.81	4.52	3.3	3.55	3.91	4.08	5.84	3.78	4.38	3.68	3.82	4.32	6.7	6.56	4.05	5.64	6.18	3.37	6.41	7.62	6.48	6.51	4.97	5.3	4.88	5.85	6.06	6.48	4.32	5.87	5.35	3.05	3.06	2.44	2.67	2.59	2.84	2.84	2.8	2.72	3.3
2310015B20Rik	NR_038041	0.45	1.37	1.25	7.17	0.46	0.61	0.65	0.72	2.26	2.71	0.5	0.5	1.23	0.28	0.29	1.62	1.06	1.17	0.81	1.11	1.38	1.76	0	0.24	0.98	0.24	8.64	1.9	1.94	0.75	1.11	0	0.63	0.27	0	0.67	0.24	3.82	0.72	1.23	1.3	2.12	0	0.36	1.15	2.31	0.72	0.84
2310015D24Rik	NR_037997	0	0.02	0	0	0	0	0	0	0	0	0	0.03	0	0	0	0	0	0	0	0	0	0.03	0	0	0	0	0.23	0	0	0.1	0.04	0	0	0	0	0.03	0	0.06	0.03	0	0	0	0.02	0	0	0	0	0
2310016D03Rik	NR_045491	0	0	0	0	0	0	0	0	0	0	0	0	0	0	0	0	0	0	0	0	0	0	0	0	0	0	0	0	0	0	0	0	0	0	0	0	0	0	0	0	0	0	0	0	0	0	0	0
2310020H05Rik	NR_045495	0	0	0	0	0	0	0	0	0	0	0	0	0	0	0	0	0.12	0.23	0	0	0	0	0	0	0	0	0.6	0	0	0	0	0	0	0	0	0	0	0	0	0	0	0	0	0	0	0	0	0
2310022A10Rik	NM_001122767,NM_175107	3.87	5.2	4.28	3.67	5.19	4.29	5.12	4.28	5.58	5.81	4.44	5.67	5.9	4.74	5.02	5.67	5.96	5.32	5.01	4.5	5.27	4.49	6.47	6.03	4.22	5.99	6.07	5.06	4.85	4.95	4.91	6.34	5.4	4.4	6.22	5.41	4.9	5.31	6.91	7.33	5.6	6.94	5.71	8.59	4.78	5.75	5.36	6.55
2310022B05Rik	NM_175149	9.35	12.72	7.68	5.59	7.38	7.14	9.53	8.3	12.11	10.22	6.34	9.31	8.4	7.74	7.68	12.01	8.9	9.93	8.88	16.7	21.92	16.32	18.78	16.16	13.61	15.84	16.06	19.18	22.6	17.7	14.44	16.1	18.08	19.26	19.86	17.4	16.91	18.81	12.18	16.53	10.91	13.54	12.63	17.98	11.18	14.35	13.94	18.15
2310030A07Rik	NR_040603	0	0	0	0	0	0	0	0	0	0	0	0	0	0	0	0	0	0	0	0	0	0	0	0	0	0	0	0	0	0	0	0	0	0	0	0	0	0	0	0	0	0	0	0	0	0	0	0
2310030G06Rik	NM_025865	21.66	18.65	21.88	19.2	23.65	21.55	24.48	25.41	20.69	17.71	19.85	19.82	19.59	29.25	25.32	20	21.32	18.5	28.47	11.73	10.5	11.12	6.69	12.17	10.03	11.56	20.86	9.49	10.66	11.38	10.45	11.07	10.15	12.81	14.06	10.84	12.41	11.78	33.07	34.35	31.49	27.9	34.54	33.93	33.22	34.41	31.12	29.67
2310033P09Rik	NM_024210	33.66	24.6	29.94	24.18	32.46	28.79	32.69	32.7	29.42	24.33	28.67	32.87	33.32	29.81	29.77	26.97	27.84	32.33	32.17	17.17	17.37	18.6	21.24	20.47	16.53	19.88	24.43	18.17	15.14	17.79	18.55	21.92	21.8	22	16.88	17.54	17.32	18.34	22.6	23.86	22.6	22.57	26.91	21.62	17	25.15	28.69	18.15
2310034C09Rik	NM_054100	0	0	0	0	0	0	0	0	0	0	0	0	0	0	0	0	0	0	0	0	0	0	0	0	0	0	0	0	0	0	0	0	0	0	0	0	0	0	0	0	0	0	0	0	0	0	0	0
2310034G01Rik	NR_040418	7.52	5.24	6.73	4.12	7.47	6.52	5.09	7.56	6.38	7.19	5.51	6.51	6.24	4.51	4.97	5.01	6.21	6.22	5.72	5.85	6.63	8.48	8	5.66	4.77	6.32	7.59	7.78	4.13	6.75	5.8	6.76	5.06	7.31	6.85	8.97	5.36	5.04	5.94	5.59	6.11	5.54	7.3	3.62	5.75	8.86	5.52	4.45
2310034O05Rik	NR_040679	7.17	3.73	6	7.21	6.7	7.27	8.93	7.2	6.58	6.66	5.52	7.4	8.97	8.69	6.4	5.43	5.28	8.64	8.52	0.08	0.22	0.14	0	0.09	0.24	0.17	0.25	0.14	0.1	0.07	0.05	0	0.15	0	0	0	0.09	0.08	2.62	3.17	3.2	1.89	2.38	2.39	1.36	0.98	3.58	1.7
2310035C23Rik	NM_029349,NM_173187	20.74	16.18	17.57	14.57	21.81	20.5	25.7	15.9	25.05	14.96	17.13	25.22	24.23	22.3	20.99	16.05	15.46	25.01	17.72	15.38	19.34	10.91	14.12	22.07	7.55	21.7	20.3	12.4	17.48	13.99	17.78	24.67	19.88	19.15	21.23	16.04	20.97	21.23	29.55	28.8	18.96	22.28	23.98	31.43	20.91	26.42	27.2	30.14
2310036O22Rik	NM_026760	70.87	71.34	91.26	110.9	97.3	68.15	67.87	89.52	77.43	88.11	92.34	77.47	74.41	78.5	83.79	82.53	107.96	81.64	77.87	86.48	79.91	99.47	98.64	97.2	81.42	66.98	84.33	87.19	73.6	89.08	75.55	73.38	75.66	87.23	66.73	90.95	75.73	70.42	106.43	109.33	107.83	122.07	140.66	95.6	109.24	124.31	129.65	73.63
2310039H08Rik	NM_025966	40.84	46.8	59.39	53.05	52.53	36.14	36.71	59.71	43.3	62.84	55.04	48.9	40.73	38.17	46.48	43.39	50.71	48.55	59.51	104.45	94.08	117.23	124.25	93.29	96.71	65.55	85.42	108.68	80.5	100.79	93.57	81.84	65.09	96.21	80	103.83	71.9	70.22	74.06	65.58	91.33	90.25	87.34	64.26	72.42	82.03	92.07	53.13
2310039L15Rik	NR_045337	3.99	5.62	6.41	12.01	7.99	7.23	8.29	6.14	8.13	10.6	6.7	7.74	9.92	6.73	6.44	8.27	6.52	8.67	7.64	5.09	6.62	5.82	5.08	12.12	3.44	18.52	11.67	4.96	8.77	3.87	11.8	13.39	11.6	6.94	7.27	8.78	11.65	6.5	8.22	9.03	3.68	6.74	8.46	11.58	4.98	5.41	5.53	10.11
2310040G24Rik	NR_040292,NR_040293	5.09	8.34	6.07	9.01	6.6	6.03	5.05	10.17	8.58	9.62	5.95	5.66	8.59	9.94	6.75	9.65	7.62	6.2	6.59	2.31	3.97	4.32	5.32	2.78	4.17	3.19	12.44	3.97	3.75	5.51	4.09	1.9	2.85	5.43	4.26	4.75	5.36	6.25	4.88	7.02	4.52	2.74	6.03	4.27	4.91	4.11	4.44	4.98
2310043L19Rik	NR_037994	0	0.21	0.5	1.17	0.28	0.36	0.13	0.22	0	0.47	0.3	0.15	0.12	0	0	0	0	0.12	0.49	0	0	0.12	1.44	0	0	0	0.41	0	0.17	0.11	0.08	0	0.25	0	0	0	0	0	0.15	0.76	0.47	0.36	0.14	0.22	0.14	1.59	0.44	0.25
2310043O21Rik	NR_045757	0	0	0	0	0.11	0	0	0.25	0	0.13	0	0	0	0.38	0	0	0	0.27	0.14	0.31	0	0	0	0.33	0	0	0.7	0.26	0	0.9	0.1	0.34	0.14	0	0.25	0.46	0	0.15	0.33	0.51	0.35	0.65	0.24	0.5	0.95	0.4	1.16	0.58
2310045N01Rik	NM_001145552	43.44	46.88	47.96	37.49	42.22	44.12	36.25	45.06	49.15	46.69	40.17	40.63	44.08	40.06	45.03	50.09	43.47	41.19	51.13	48.37	48.92	50.36	57.88	52.05	51.6	45.33	59.83	51.99	49.11	54.37	49.72	47.43	47.13	44.95	51.52	45.09	36.64	45	56.73	65.23	68.99	72.95	64.03	62.75	59.88	56.11	60.97	58.9
2310047M10Rik	NM_028005	19.86	20.47	23.93	20.95	28.68	25.97	25.63	18.38	24.5	21.96	19.56	25.99	29.41	17.34	21.81	20.95	21.73	30.57	15	19.69	17.55	21.83	20.61	28.34	24.84	24.93	16.08	20.76	19.08	19.84	24.92	27.47	32.32	21.92	19.15	18.98	24.78	25.25	29.38	28.62	23.3	28.81	26.95	24.77	28.26	24.51	32.07	22.78
2310050C09Rik	NM_025621	0	0	0	0	0	0	0	0	0	0	0	0	0	0	0	0	0	0	0	0	0	0	0	0	0	0	0	0	0	0	0	0	0	0	0	0	0	0	0	0	0	0	0.05	0	0	0	0	0
2310057J18Rik	NM_026336	0.07	0.05	0.06	0	0.14	0.05	0	0.17	0.08	0.18	0	0.08	0	0.08	0	0	0	0.06	0	0	0	0	0	0	0	0	0	0	0	0	0	0	0	0	0	0	0	0	0	0	0	0	0	0	0	0	0	0
2310057M21Rik	NM_026655	7.98	6.7	8.2	6.01	9.33	9.3	10.66	5.39	8.8	5.79	7.24	10.41	10.27	5.69	8.17	5.71	5.54	9.49	5.26	6.73	7.81	6.74	7.78	9.59	5.32	12.88	8.32	7.92	7.07	5.9	9.65	12.4	12.93	9.83	7.58	7.05	10.71	10.18	17.17	13.73	13.04	12.92	14.87	13.78	14.23	15	16	12.92
2310057N15Rik	NM_027170	0	0	0	0	0	0	0	0	0	0	0	0	0	0	0	0	0	0	0	0	0	0	0	0	0	0	0	0	0	0	0	0	0	0	0	0	0	0	0	0	0	0	0	0	0	0	0	0
2310061I04Rik	NM_001033630	19.1	18.68	20.96	16.19	22.06	21.54	21.95	23.08	21.63	25.5	17.3	22.41	24	19.8	22.47	17.46	20.23	20.67	19.55	35.03	33.98	29.88	40.78	36.42	32.98	33.52	38.78	37.71	39.52	29.95	33.53	28.72	33.82	41.22	35.9	28.94	33.08	34.62	57.66	43.78	44.06	47.64	48.39	50.21	48.71	48.31	56.23	48.71
2310061J03Rik	NR_027965	6.41	5.97	6.65	7.38	6.72	5.42	4.6	6	5.6	9.59	6.15	7.72	6.05	6.9	6.59	7.09	7.07	4.99	5.23	7.17	7.25	9.46	8.72	6.32	5.45	4.49	6.22	9.47	5.8	8.32	7.65	5.87	5.18	11.58	5.1	6.56	3.7	5.21	9.57	11.04	8.84	10.96	9.9	7.98	7.46	10.59	11.92	9.07
2310061N02Rik	NM_027155	0	0	0	0	0	0	0	0	0	0	0	0	0	0	0	0	0	0	0	0	0	0	0	0	0	0	0	0	0	0	0	0	0	0	0	0	0	0	0	0	0	0	0	0	0	0	0	0
2310065F04Rik	NR_038055	0	0	0	0	0	0	0	0	0	0	0	0	0.03	0	0	0	0	0	0	0	0	0	0	0	0	0	0.25	0	0	0	0	0	0	0	0	0	0	0.1	0	0	0	0	0	0	0	0	0	0
2310067B10Rik	NM_028014	15.95	17.18	15.07	16.08	23.87	18.15	27.92	28.09	25.84	18.7	17.67	26.94	24.06	33.32	26.63	19.7	19.26	22.82	22.55	13.18	16.66	8.61	13.41	16.86	6.6	16.61	23.07	12.97	18.14	13.49	15.45	19.17	15.55	14.14	20.5	12.38	17.25	16.61	29.61	28.23	18.69	27.36	24.09	33.59	15.03	24.65	24.33	32.81
2310068J16Rik	NR_028124	1.35	1.12	1.65	5.43	1.65	1.31	1.33	0.8	2.15	1.73	0.93	1.17	0.82	0.51	1.74	0.61	1.12	1.48	2.5	2.32	2.74	2.91	3.81	2.46	1.05	1.7	2.15	3.53	1.53	3.61	2.72	1.89	1.37	3.3	3.17	2.67	1.33	2.43	5.79	4.34	6.32	7.76	4.66	3.99	4.91	5.63	7.51	3.23
2310069B03Rik	NR_040520	0.49	0.23	0.64	0.75	0.61	0.29	0.46	0.71	0.44	0.51	0.4	0.37	0.53	0.66	1.03	0.21	0.8	0.63	0.27	1.54	2.18	1.79	1.19	1.81	1.04	1.96	1.33	1.67	1.16	2.14	1.55	1.75	1.58	1.71	0.55	1	1.53	1.63	0.8	1.22	0.94	1.04	1.08	0.7	0.86	0.65	0.85	0.83
2310069G16Rik	NR_040309	0	0	0	0	0	0	0	0	0	0	0.08	0	0	0	0	0	0	0	0.1	0	0	0	0	0	0	0	0	0	0	0	0	0	0	0	0	0	0	0	0	0	0	0	0	0	0	0	0	0
2310079G19Rik	NM_027173	0	0	0	0	0	0	0	0	0	0	0	0	0	0	0	0	0	0	0	0	0	0	0	0	0	0	0	0	0	0	0.13	0	0	0	0	0	0	0	0	0	0	0	0	0	0	0	0	0
2310081J21Rik	NR_045474,NR_045474_chr13:50679169_50680224	0	0	0	0	0	0	0	0	0	0	0	0	0.33	0	0	0	0	0	0	0	0	0	0	0	0	0	0	0	0	0	0	0	0	0	0	0	0	0	0	0	0	0	0	0	0	0	0	0
2410002F23Rik	NM_025880	47.69	34.31	46.71	46.02	56.44	56.02	61.97	48.07	47.1	45.72	38.43	56.02	70.07	44.34	46.27	38.39	35.27	57.36	55.4	46.29	51.97	50.32	60.47	51.74	35.59	65.26	77.83	46.39	48.63	50.78	54.76	55.17	60.65	57.25	57.47	48.4	56.74	49.28	74.02	64.08	57.77	66.15	66.36	60.84	74.21	69.35	70.36	60.17
2410003L11Rik	NR_045496	0	0	0	0	0	0	0	0	0	0	0	0.17	0	0	0	0	0.15	0.27	0	0.16	0	0	0.33	0	0	0	0	0	0.39	0	0	0	0	0.19	0	0	0	0	0.17	0	0.18	0.41	0	0	0	0.61	0	0
2410004B18Rik	NM_025555	16.67	13.21	14.86	10.91	15.77	13.88	16.6	14.56	16.84	14.74	12.12	15.61	15.4	17.69	16.74	14.2	16.39	17.92	13.26	11.84	12.02	14.34	12.11	13.44	11.9	17.06	11.91	12.86	8.93	14.51	9.78	11.66	16.45	14.14	11.5	12.33	11.61	12	19.38	20.22	18.22	16.23	19.44	17.75	19.97	16.91	21.18	18.79
2410004I01Rik	NR_037963	0.1	0.3	0	0	0.2	0.06	0.18	0.23	0.22	0.08	0.07	0	0	0	0.13	0	0	0.17	0	0.2	0.34	0	0.14	0.11	0	0.2	0.44	0.25	0.6	0	0.12	0	0	0.12	0	0.59	0.21	0.19	0.11	0.11	0.22	0.41	0.05	0	0.5	0.76	0	0.18
2410004N09Rik	NR_038151,NR_038152	45.24	46.3	51.54	52.49	56.06	41.47	41.81	50.36	30.53	57.45	51.87	39.97	42.01	34.56	34.89	49.75	59.41	49.66	39.61	77.69	69.26	94.42	74.1	67.21	72.07	59.09	64.4	81.08	68.58	69.62	70.76	55.62	59.08	68.06	60.95	88.68	59.6	55.92	28.95	25.48	37.09	39.12	37.46	26.25	33.81	27.95	36.85	23.68
2410004P03Rik	NM_001201332,NM_001201333	2.92	1.21	0.97	0.98	0.71	0.86	0.96	3.04	0.73	1.56	1.84	0.93	0.46	1.15	1.34	1.04	0.93	1.03	3.74	0	0	0.04	0	0.17	0	0.16	0.15	0.04	0.06	0.34	0.03	0.17	0.09	0	0	0.1	0	0.05	0	0.06	0	0.22	0.11	0.08	0.11	0.14	0.06	0
2410006H16Rik	NR_030738	271.55	343.68	325.43	357.11	367.54	338.22	305.77	240.39	275.93	337.52	339.47	305.32	332.75	179.79	278.98	369.91	328.65	309.48	190.68	417.96	458.98	482.66	427.87	400.66	431.64	324.55	290.32	415.66	463.31	411.1	436.73	342.86	394.88	375.74	436.44	435.37	347.58	345.91	159.31	179.67	191.44	220.5	162.81	193.24	211.71	192.55	184.39	173.24
2410007B07Rik	NR_040539	0	0	0	0	0.06	0.06	0	0	0	0	0	0	0	0	0	0	0	0.08	0	0.18	0	0	0	0	0	0	0	0	0	0	0.11	0.1	0	0	0	0.09	0	0	0	0	0	0	0.09	0	0	0	0	0
2410012E07Rik	NR_045939	0	0	0	0	0	0	0	0	0	0	0	0	0	0	0	0	0	0	0	0	0	0	0	0	0	0	0	0	0	0	0	0	0	0	0	0	0	0	0	0	0	0	0	0	0	0	0	0
2410012M07Rik	NM_028033	0	0	0	0	0	0	0	0	0	0	0	0	0	0	0	0	0	0	0	0	0	0	0	0	0	0	0	0	0	0	0	0	0.05	0	0.08	0	0	0	0	0	0	0.11	0	0	0	0	0	0
2410015M20Rik	NM_153152	280.58	332.93	291.08	355.68	267.42	301.58	272.96	343.1	249.74	347.32	272.08	304.49	294.33	284.99	260.79	309.32	349.71	283.08	338.47	400.37	409.14	435.35	465.34	350.93	401.95	326.74	366.13	410.74	356.64	400.33	346.58	312.26	340.5	370.25	369.51	389.53	345.05	343.46	330.5	380.71	413.99	415.4	355.52	316.62	390.47	399.51	352.86	332.3
2410016O06Rik	NM_023633	4.72	3.38	5.47	5.75	5.87	6.63	6.47	5.85	4.47	5.66	4.88	5.36	4.86	5.59	5.1	5.83	4.21	5.86	6.38	7.19	5.87	7.11	6.77	6.6	4.85	6.78	8.12	7.37	5.72	5.68	7.04	5.9	6.32	8.89	5.87	5.76	6.77	5.44	16.56	10.35	13.96	13.74	15.12	10.62	11.65	11.93	14.99	11.39
2410017I17Rik	NR_033517	0.05	0.05	0	0	0.08	0	0.11	0	0	0	0	0	0.06	0	0	0.09	0.06	0	0.06	0	0	0	0	0.07	0.17	0	0	0.16	0	0.1	0	0.13	0.06	0.07	0.1	0.12	0	0	0	0	0.07	0.46	0.09	0	0.25	0.08	0.09	0
2410018L13Rik	NR_015504	2.15	1.44	1.27	1.13	2.22	1.24	1.66	1.6	2.63	3	1.19	2.15	1.47	2.77	1.58	2.06	2.65	1.68	2	1.25	1.1	1.06	2.1	1.14	1.09	1.26	2.63	1.25	0.73	1.82	0.87	1.22	1.89	1.78	1.12	2.04	2.22	1.32	0.99	1.66	0.89	2.18	1.05	0.32	1.35	1.62	0.92	1.35
2410021H03Rik	NR_045428	0	0	0.11	0	0	0	0	0	0	0	0	0	0	0	0.16	0	0	0	0	0	0	0	0	0	0	0.13	0.19	0	0	0	0	0.13	0.11	0	0.2	0	0.13	0	0.13	0	0	0	0.06	0	0	0	0	0.23
2410088K16Rik	NR_040493	0	0	0	0	0	0	0	0	0	0	0	0	0.19	0	0	0	0	0.18	0	0.21	0	0.36	0	0	0.3	0	0	0.18	0.26	0	0	0.23	0.19	0.25	0	0.62	0	0	0	0	0	0	0	0	0	0	0	0
2410089E03Rik	NM_001162906	2.52	2.52	1.79	1.99	2.97	2.11	4.03	2.34	3.72	2.1	2.19	3.43	3.99	2.92	3.15	2.22	1.92	3.55	2.05	2.05	2.46	1.14	1.76	2.74	0.87	2.98	2.41	1.8	2.53	1.62	2.16	2.61	3.02	2.05	2.67	2.47	2.37	2.6	3.13	2.65	1.46	1.84	1.92	3.4	1.55	2.16	2.35	2.83
2410114N07Rik	NR_040652	0	0	0	0	0.07	0.06	0	0.31	0	0	0.07	0	0	0	0	0	0	0	0	0	0	0.08	0	0	0.28	0	0	0.08	0	0	0	0.21	0	0	0	0	0	0.09	0	0.22	0.22	0.04	0	0	0.2	0.13	0.11	0.36
2410124H12Rik	NM_029740	0	0	0	0	0	0	0	0	0	0	0	0	0	0	0	0	0	0	0	0.13	0	0.47	0.85	0	0.58	0.14	0	0.35	0.83	0.11	0.25	0.15	0.5	0.16	0.86	0.27	0	0.13	0	0	0	0	0.07	0	0	0	0	0
2410127L17Rik	NM_026120	33.96	20.55	28.6	16.28	32.26	25.36	34.84	22.56	34.81	17.74	25.2	28.18	30.22	29.59	29.81	19.7	22.21	30.98	22.99	19.76	18.17	14.61	12.33	23.36	10.84	18.44	19.04	16.88	17.41	12.41	19.11	21.52	20.53	20.5	23.55	19.23	20.13	25.07	42.67	41.7	35.65	27.7	35.1	42.01	37.88	46.74	41.97	45.11
2410131K14Rik	NM_001081236	8.07	9.8	8.16	4.53	9.62	9.3	12.52	6.94	8.65	7.64	7.45	11.04	11.77	7.77	8.32	7.34	7.19	10.6	7.2	7.36	9.72	6.18	5.6	9.61	5.94	8.37	7.82	6.78	7.78	5.96	9.25	11.12	10.73	7.96	8.54	6.64	10.06	9.89	12.11	10.59	8.09	9.73	9.02	12.17	7.19	7.72	10.72	11.48
2410137M14Rik	NM_029747	0	0	0	0	0	0	0	0	0	0	0	0.12	0	0	0	0	0	0	0	0	0	0	0	0	0	0	0	0	0	0	0	0	0.2	0	0	0	0	0	0	0	0	0	0	0	0	0	0	0
2410141K09Rik	NM_001290196,NM_183119	1.35	0.47	0.38	0.3	1.14	0.76	0.67	0.77	1.16	0.31	0.91	1.29	1.16	0.84	0.67	1.05	0.22	0.79	1.1	0.31	0.32	0.11	0.29	0.11	0.31	0	0	0.18	0.67	0.3	0.22	0.47	0.35	0.09	0.1	0	0.57	0.54	0.4	0.26	0.36	0.6	0.19	0.25	0.45	0.49	0.44	0.12
2500002B13Rik	NR_126553,NR_126556	1.05	0.81	0.97	0.5	1.12	0.7	0.77	1.21	1.18	1.5	0.52	0.78	0.84	0.71	1.37	0.5	1.65	0.2	1.04	1.04	0.82	0.84	0.08	0.25	0.86	0.12	0.7	2.6	0.72	1.16	1	0.63	0.75	1.8	0.56	0.66	0.75	1.34	0.72	1.26	0.79	1.67	0.72	0.59	0.6	0.61	0.12	0.43
2500004C02Rik	NR_040318	4.3	3.73	3.92	1.99	4.26	3.51	3.43	5.33	3.72	3.36	3.32	3.81	4.31	5.61	4.72	3.81	2.62	2.72	4.67	4.32	2.89	3.37	2.69	2.73	2.5	2.44	4.1	3.65	3.07	3.03	2.77	2.58	2.72	3.64	2.97	3.42	3.28	2.2	4.66	2.96	4.54	3.66	4.14	3.35	2.88	4.99	3.83	3.22
2510002D24Rik	NM_001033164	27.21	22.71	27.92	25.49	35.06	26.06	29.1	30.58	27.25	23.94	24.57	25.96	25.66	33.11	35.24	24.65	25.52	26.25	29.25	16.93	13.89	15.34	15.13	17.76	14.66	15.69	20.14	16.69	17.78	16.94	16.3	15.02	17.43	16.31	17.84	16.22	15.46	16.31	16.63	15.78	15.71	18.06	15.67	17.77	13.17	17.45	20.35	17.18
2510003E04Rik	NM_028197	28.36	24.74	26.56	20.31	29.37	26.82	28.65	26.31	31.3	22.79	22.59	25.66	27.17	33.35	29.23	23.99	22.39	25.01	29.59	19.98	23.4	18.88	20.79	20.37	13.99	24.63	26.41	20.61	23.87	19.01	22.55	22.91	21.84	19.6	24.16	20.42	23.25	22.46	32.71	31.78	29.47	28.7	31.35	37.55	28.43	33.22	30.5	35.09
2510009E07Rik	NM_001001881	6.4	6.24	4.91	4.39	9.39	4.62	9.98	4.54	10.06	4.2	5.38	6.6	6.78	13.5	9.29	6.95	6.61	5.95	4.84	3.22	3.2	2.43	2.59	2.37	1.98	2.42	3.89	2.87	3.9	2.82	2.53	1.94	2.69	3.04	3.09	3.02	1.95	3.15	1.94	2.1	1.82	1.69	1.88	3.34	1.98	1.92	1.74	3.67
2510039O18Rik	NM_029841	25.98	26.72	27.74	23.56	30.13	27.93	31.49	29.68	31.87	28.73	22.36	28.78	29.66	32.05	28.2	28.8	29.24	31.56	29.38	18.79	21.4	18.13	21.34	19.5	16.87	21.46	26.09	21.21	21.44	17.89	18.84	22.18	21.93	20.95	21.04	18.88	20.27	19.52	31.44	30.79	27.78	30.63	30.7	34.01	22.76	32.86	33.19	30.9
2610001J05Rik	NR_024619	24.77	25.39	21.47	33.8	24.21	21.27	22.43	24.99	24.76	24.79	18.32	20.72	22.62	31.45	27.75	28.28	27.8	21.71	29.31	21.5	23.17	21.12	22.41	18.06	18.6	19.36	22.61	23.36	25.88	24.51	17.75	16.69	18.1	22.03	25.97	28.43	22.3	20.23	18.52	23.92	17.43	21.71	18.37	20.69	17.63	20.55	15.49	23.04
2610002J02Rik	NM_001190445,NR_033802	23.81	24.76	26.92	32.91	26.79	26.48	25.9	33.7	29.97	36.65	23.84	28.87	27.36	33.86	27.71	33.98	39.25	28.92	25.87	21.36	17.46	23.77	23.24	21.43	23.51	17.32	24.99	19.93	22.9	22.88	19.94	19.42	18.25	20.72	19.81	23.87	20.24	19.03	21.84	22.15	23.3	28.97	19.47	24.38	21.76	21.59	25.28	21.87
2610002M06Rik	NM_025921	16.56	11.02	13.23	12.35	11.04	12.75	13.51	10.27	14.88	8.44	10.05	12.64	11.78	10.97	12.03	9.44	8.02	12.8	13.91	12.58	11.02	9.66	9.63	13.3	5.95	11.98	13.17	10.79	11.55	9.18	11.34	14.04	10.89	13.94	14.84	10.58	13.45	13.18	29.64	26.95	23.91	18.99	25.88	29.35	23.19	26	26.36	29.31
2610005L07Rik	NR_028428	10.11	7.97	10.87	7.74	10.88	9.76	12.99	10.73	11.87	7.1	8.91	14.52	16.08	19	11.13	7.21	6.72	13.3	16.23	5.92	7.76	3.87	5.01	8.89	1.51	8.7	19.73	4.49	6.45	4.96	7.46	9.86	7.92	5.35	9.2	6.29	8.08	10.3	11.68	11.9	8.56	10.18	9.48	11.23	8.77	7.75	10.52	10.46
2610008E11Rik	NM_001004362	4.53	2.93	2.42	3.26	4.09	3.52	3.97	7.07	4.06	4.32	3.39	4.94	4.28	8.65	4.34	5.3	4.17	5.13	7.39	4.36	5.2	2.85	3.72	4.12	2.04	4.08	9.34	4.55	3.86	3.93	3.93	3.36	3.63	4.01	4.58	3.66	4.66	3.53	4.12	4.53	3.03	3.15	3.21	4.82	2.66	3.93	3.8	4.84
2610015P09Rik	NM_027801	4.29	2.92	3.29	2.93	4.44	3.76	4.03	3.28	4.59	3.02	3.9	4.28	4.43	4.24	3.54	3.12	2.74	4.85	3.7	3.81	3.94	2.66	4.59	5.06	2.99	5.18	6.46	3.61	3.47	4.27	4.75	4.8	4.45	3.69	4.6	3.22	4.61	4.32	6.49	5.49	5.04	4.78	5.42	5.69	4.97	5.25	5.97	5.95
2610016A17Rik	NR_045347	1.87	4.3	2.12	3.11	2	0.99	1	3.35	3.95	3.41	1.08	1.15	1.89	5.13	2.16	3.31	4.91	1.26	4.32	14.43	10.04	16.82	13.87	8.09	9.35	11.33	21.4	10.24	8.74	16.41	8.58	3.24	14.38	10.6	8.69	10.12	10.88	9.54	7.61	3.67	5.28	6.24	6.09	3.35	9.84	2.95	5.14	1.94
2610020C07Rik	NR_038156	0.17	0.27	0.36	0.28	0.39	0.45	0.52	0.61	0.29	0.4	0.19	0.69	0.73	0.36	0.39	0.06	0.24	0.54	0.66	0.53	0.53	0.45	0.57	0.69	0.66	1.16	0.64	0.61	0.89	0.79	0.58	0.27	0.55	0.37	0.47	0.22	0.98	0.61	0.66	0.44	0.39	0.93	0.59	0.34	0.31	0.45	0.43	0.64
2610020H08Rik	NM_001004187,NM_028129	1.22	1.47	0.83	2.69	1.22	1.44	1.34	1.88	1.96	1.56	1.03	1.75	6.98	2.06	1.73	1.29	1.65	1.01	1.77	1.6	2.11	1.42	1.31	1.4	0.8	1.73	2.39	1.78	1.57	2.08	1.52	1.72	1.26	1.6	2.11	1.91	2.57	1.62	1.36	1.25	1.38	1.16	0.99	1.78	0.96	1.59	1.49	2.25
2610027K06Rik	NR_077059	1.49	1.87	2.29	1.53	1.97	1.57	1.54	2	1.94	1.76	1.82	1.97	1.84	2.26	2.45	2.01	2.17	1.9	2.48	0.85	1.04	0.61	0.55	1.15	0.34	1.06	0.58	0.67	0.92	0.7	0.85	0.38	0.78	0.39	0.87	0.87	1.03	0.6	0.26	0.18	0.16	0.09	0.32	0.06	0.12	0.36	0.46	0.36
2610028E06Rik	NR_015560	0	0.02	0	0	0.03	0	0	0	0	0	0	0.05	0.02	0	0	0	0.02	0.02	0.07	0	0	0	0.04	0	0	0	0	0	0	0.04	0	0	0	0	0	0	0	0	0	0	0.03	0	0	0	0.03	0	0	0
2610028H24Rik	NM_029816	0.61	0.05	0.25	0	0	0.46	0.51	1.46	0.7	0.47	0.71	0.22	0.3	0.2	0.16	0.17	0.16	0.43	1.07	0	0.12	0.32	0.33	0	0	0	0	0	0.1	0	0	0	0.2	0	0.3	0.19	0.08	0.07	0	0	0.15	0	0.03	0.09	0	0.08	0.07	0
2610034B18Rik	NM_027420	12.84	14.87	14.24	13.98	14.05	13.01	13.2	15.15	17.77	13.77	10.96	13.62	12.92	15.26	12.74	14.45	11.55	14.88	15.38	4.62	7.59	5.95	5.61	4.26	3.94	4.42	9.3	5.71	7.07	6.01	4.89	5.16	4.43	5.44	8.6	8.32	4.19	6.18	10.7	11.69	10.41	10.18	11.55	14.56	6.9	12.94	11.3	13.86
2610034M16Rik	NM_027001	0.13	0.15	0.08	0.28	0.16	0.07	0.02	0.03	0.09	0.09	0.02	0.14	0.46	0.21	0.06	0.15	0.16	0.2	0.23	0.15	0.15	0.37	0.05	0.21	0.18	0.17	0.32	0.2	0.05	0.27	0.1	0.23	0.16	0.08	0.03	0.17	0.14	0.23	1.76	2.26	2.22	1.88	1.73	1.95	2.46	3.09	2.11	2.3
2610035D17Rik	NR_015556	2.01	1.55	2.39	0	1.24	1.7	2.61	1.6	1.63	1.81	1.42	2.32	2.97	0.35	1.34	1.56	1.53	2.15	3.37	0.69	0.39	0.21	0.62	0.74	0.62	1.04	1.54	0.97	0.42	0.98	0.42	0.94	1.03	0.42	0.77	0.79	0.58	0.43	0.58	0.44	0.66	0.31	0.64	0.54	0.4	0.19	0.84	0.73
2610035F20Rik	NR_045046	0	0	0	0	0	0	0	0	0	0	0	0	0.07	0	0	0	0	0	0	0	0	0	0	0	0	0	0	0	0	0	0	0	0	0	0	0	0	0	0	0	0	0	0	0	0	0	0	0
2610037D02Rik	NR_040423	0.02	0.04	0.02	0.05	0.08	0	0	0.02	0	0	0.02	0.03	0	0	0	0	0.02	0	0.02	0.02	0.02	0.06	0	0.03	0.03	0.02	0	0.04	0	0	0	0	0.07	0	0	0.02	0	0	0.03	0.06	0	0.03	0.04	0.04	0.03	0.13	0	0.05
2610044O15Rik8	NM_153780	10.38	8.51	5.77	9.85	8.44	8	8.15	10.9	10.89	10.06	8.09	9.37	8.85	11.53	9.13	10.69	10.23	8.59	9.05	7.46	8.02	7.22	6.11	6.31	6.04	6.02	10.01	6.9	8.01	7.56	7.12	6.34	6.86	6.1	7.18	8.17	6.76	6.39	7.02	6.3	6.65	6.61	6.49	7.16	6.82	7.35	6.15	8.81
2610100L16Rik	NR_033490	0	0	0	0	0	0	0	0	0	0	0	0	0	0	0	0	0	0	0	0.07	0.06	0	0	0.14	0	0.07	0.1	0.06	0	0	0	0.07	0.12	0.25	0	0	0.07	0	0.15	0	0.08	0	0	0.11	0	0	0	0
2610203C20Rik	NR_015483	1.5	2.18	1.22	2.27	2.68	1.78	1.59	1.33	2.24	3.26	1.76	2.62	2.17	2.77	1.32	3.23	2.83	2.5	2.24	1.37	0.86	1.26	0.64	1.42	1.66	3.76	1.97	1.81	1.46	1.22	1.75	0.82	2.85	1.68	1.15	1.48	1.38	1.55	0.76	1.18	0.82	0.57	0.71	1.21	0.89	1.55	0.52	1.03
2610203C22Rik	NR_015470	2.36	1.14	1.63	1.76	1.37	1.02	1.59	1.06	1.97	0.38	0.93	1.43	1.39	1.52	0.77	2.13	1.32	1.44	1.13	2.96	2.6	2.42	1.56	1.9	0.94	2.26	3.21	2.22	1.91	1.96	2.04	3.02	1.82	3.08	2.22	2.74	2.6	2.51	3.99	3.88	3.57	2.88	2.95	3.98	4.07	2.31	3.17	4.38
2610206C17Rik	NR_038175	0.63	0.57	0.73	0	0.73	0.8	0.79	0.42	0.23	0.77	0.28	0.57	0.85	0.7	0.34	0.76	0.55	0.76	0.57	0.16	0.23	0.27	0.22	0.4	0.37	0.32	0	0.23	0.46	0.31	0.55	0.45	0.63	0.13	0.25	0.27	0.23	0.31	0.74	0.18	0.42	0.25	0.36	0.25	0.22	0.42	0.06	0.39
2610301B20Rik	NM_026005	19.08	13.56	15.8	16.92	19.29	17.56	17.55	19.44	18.43	16.48	14.07	15.8	18.92	21.6	16.04	17.99	13.37	16.44	19.8	18.5	21.64	16.87	19.7	16.58	10.3	17.53	23.21	16.68	19.25	19.32	18.88	14.89	18.89	19.42	21.19	16.95	19.67	16.96	21.07	23.74	19.62	21.17	20.2	22.11	22.8	24.52	22.92	23.64
2610305D13Rik	NM_145078	2.5	2.64	2.35	4.68	2.98	2.89	3.13	1.79	3.28	2.14	2.59	2.85	2.57	2.45	2.37	2.11	2.81	3.92	3.6	1.3	1.38	0.76	0.5	1.08	1.26	1.2	1.04	0.94	1.7	0.82	1.44	0.97	1.42	0.86	1.52	0.73	1.16	1.22	0.83	0.91	1.03	0.68	1.2	1.28	1.57	1.7	0.9	2.52
2610306M01Rik	NR_028298	8.24	9.25	9.42	6.58	8.49	8.83	10.7	10.68	8.46	10.54	6.6	7.77	9.88	11.73	4.78	7.77	6.27	8.84	12.79	8.71	8.93	9.91	9.55	5.79	7.49	6.81	14.15	8.01	6.41	8.27	8.26	4.36	5.83	6.26	6.96	6.47	7.47	6.9	15.8	16.52	20.45	18.05	17.4	15.39	16.66	17.42	18.66	13.99
2610307P16Rik	NR_045053,NR_045054	0.51	0.56	0.53	0.49	0.38	0.19	0.38	0.75	0.6	0.38	0.43	0.54	0.58	0.7	0.48	0.47	0.31	0.37	0.92	1.06	0.9	1.19	1.27	1.81	1.26	2.24	3.18	1.19	1.24	0.84	1.35	1.59	2.02	1.17	0.85	1.34	1.32	1.47	0.79	0.85	0.73	1	1.49	0.63	0.95	0.95	1.02	1.08
2610316D01Rik	NR_045172	2.53	1.17	2.61	1.53	2.01	4.96	4.19	2.27	1.91	1.48	3.68	3.95	3.27	1.11	1.18	2.34	0.29	3.62	2.83	0	0.09	0.35	0.43	0.33	0.14	0	0.46	0	0	0.25	0.56	0.44	0	0.12	0	0.1	0.65	0.3	2.51	1.58	0.92	1.23	2.47	1.93	2.58	1.98	1.95	1.69
2610318N02Rik	NM_183287	0.72	1.12	0.47	0.78	1.24	1.48	1.83	2.9	1.05	3.11	2.05	1.88	22.9	3.42	0.47	3.04	3.56	1.91	4.26	0.58	1.09	2.25	2	0.78	3.58	0.3	3.7	2.06	1.96	1.51	0.8	3.75	1.72	0.36	1.38	0.87	5.65	2.11	0.86	2.52	4.08	2.56	1.09	1.38	0.81	2.18	1.09	1.89
2610507B11Rik	NM_001002004	23.45	24.98	21.86	19.9	29.85	25.28	40.97	41.24	36.63	19.48	21.3	28.52	34.54	60.55	29.29	25.08	19.47	29.08	38.26	42.32	51.53	21.46	37.2	52.56	16.78	54.69	59.7	34.19	51.36	34.13	43.15	60.03	51.82	46.13	57.21	38.91	61.58	51.41	52.86	47.2	27.62	36.65	39.36	60.24	26.87	35.99	44.23	51.63
2610507I01Rik	NR_037964	0.89	0.87	0.54	2.03	1.6	0.75	1.37	1.26	1.34	0.87	0.78	1.12	1.52	1.78	1.05	0.87	0.64	1.06	1.82	0.62	1.18	0.85	1.09	1.6	0.75	1.57	2.15	1.16	0.8	1.12	1.79	1.19	1.25	0.85	0.98	0.73	1.96	1.28	1.18	2.02	1.43	1.35	1.15	1.73	0.84	1.93	1.51	1.7
2610524H06Rik	NM_181075	75.65	75.78	96.78	77.49	71.22	84.08	65.03	92.58	68.67	71.48	70.22	71.2	72.52	77.18	63.08	67.11	58.72	67.52	84.78	81.67	74.19	69.1	85.89	66.69	66.25	60.95	63.56	80.73	67.2	81.55	64.12	54.31	70.95	79.64	76.53	74.63	65.75	70.92	50.81	49.42	55	51.39	52.87	42.36	46.1	52.64	55.94	48.14
2610528A11Rik	NM_001206684	0.12	0.38	0	1.88	0.09	0.08	0.24	0.3	0	0.64	0.28	0	0.79	0.15	0	0.18	0	0.53	0.23	0.25	0.33	0	0	0.4	0	0.13	0	0.21	0	0	0.23	0.68	0.69	0	0	0.25	0.4	0.12	0.27	0.14	0.14	0.46	0.06	0	0	0.16	0.27	0.47
2610528J11Rik	NM_025572	30.77	27.47	35.47	38.71	36.26	26.15	32.87	37.52	35.81	37.49	23.95	28.78	27.28	40.35	33.69	31.69	33.14	30.13	36.38	8.37	8.98	7.67	11.22	9.22	7.24	6.51	12.6	8.23	8.04	10	7.08	8.95	6.84	10.62	9.88	7.35	7.19	8.27	19.84	19.33	30.12	24.78	22.21	21.27	15.84	20.59	26.49	21.8
2700029M09Rik	NM_028299	45.81	35.21	34.5	35.34	33.16	36.03	33.88	39.05	35.86	35.94	34.65	33.15	40.9	39.55	30.78	32.4	33.24	39.35	35.51	65.99	54.7	50.75	43.38	49.57	49.85	52.83	49.99	49.97	50.81	45.82	51.42	54	58.69	60.67	51.16	52.26	52.12	52.28	59.38	54.15	54.91	46.59	56.92	61.04	70.63	62.82	60.73	59.85
2700038G22Rik	NR_045040,NR_045042	6.68	3.57	11.27	5.25	6.63	6.92	5.24	5.86	7.15	6.33	6.15	6.51	9	6.91	6.6	8.07	7.07	6.82	10.55	4.74	4.08	5.5	2.59	4.32	4.37	4.32	5.17	4.98	8.58	5.84	5.71	3.04	5.03	4.99	6.35	5.37	5.18	2.87	4.17	3.58	4.93	5.69	4.85	3.91	7.54	4.37	4.64	5.03
2700046A07Rik	NR_037693	0.3	0.46	0.12	0	0.26	0.22	0.24	0.3	0.56	0.65	0.5	0.27	0.23	0.46	0.22	0.31	0.48	0.21	0.27	0.26	0.56	0.62	0.51	0.18	0.36	0.34	0.82	0.62	0.47	0.42	0.31	0.23	0.65	0.47	0.27	0.21	0.5	0.49	0.41	0.38	0.24	0.34	0.31	0.47	0.34	0.55	0.27	0.47
2700046G09Rik	NR_033198	5.76	5.64	5.92	5.4	6.61	6.77	6.26	11.14	6.39	7.41	6.22	4.83	6.09	8.15	4.98	6.17	5.71	6.14	10.16	6.13	6.85	6.36	7.25	6.14	4.68	4.61	7.12	5.16	5.66	6.91	5.82	4.22	4.65	7.43	5.69	5.35	5.74	5.36	5.76	7.08	5.97	8.19	6.93	5.79	5.99	7.83	6.84	6.68
2700049A03Rik	NM_001163378,NM_029818	2.01	1.51	1.77	1.41	2.01	2.01	2.66	1.95	2.48	1.72	1.77	2.1	5.15	2.5	2.06	1.57	1.61	2.29	2.28	1.96	1.6	1.16	1.63	1.82	0.97	1.85	2.13	1.37	2.02	1.59	1.4	2.22	1.78	1.57	2.12	1.67	1.99	2.02	2.2	1.91	1.57	1.77	2.02	2.71	1.44	2.37	1.48	2.69
2700054A10Rik	NR_045436,NR_045437	0.88	0.78	1	0.52	1.08	1.01	0.77	1.15	0.98	0.66	0.64	0.64	0.85	0.8	0.47	0.61	0.97	0.97	1.01	1.09	1.21	1	1.2	1.19	0.85	1.15	1.54	1.1	1.05	1.4	1.08	1.09	1.31	1.36	1.16	1.17	1.3	1.4	2.21	2.47	1.65	2.08	2.4	2.4	2.3	2.44	2.04	2.32
2700060E02Rik	NM_026528	244.33	247.12	234.27	227.43	212.47	234.09	221.61	230.79	205.77	190.11	216.27	212.47	221.61	212.11	197.41	206.54	198.24	220.21	221.64	256.17	235.23	242.87	238.68	217.43	239.99	209.96	219.93	245.82	237.92	234.67	227.58	219.09	227.2	248.7	227.99	264.05	216.78	220.83	168.96	159.1	178.28	167.58	186.8	165.26	197.97	171.98	188.19	171.41
2700062C07Rik	NM_026529	28.81	23.65	29.07	27.15	30.57	33.19	26.85	34.39	31.03	27.38	26.84	28.02	30.35	30.48	24.42	28.69	24.1	27.4	34.4	27.54	30.63	27.32	42.92	28.8	27.87	30.14	38.89	30.72	34.31	32.63	26.48	25.81	28.73	31.5	32.05	32.06	27.24	28.35	32.05	38.62	36.41	40.01	34.18	32.98	31.19	35.97	32.1	30.71
2700069I18Rik	NR_045905	0	0.28	0	0	0	0	0	0.19	0	0	0.09	0	0	0	0	0.17	0	0	0	0	0	0.1	0	0	0	0	0	0	0	0.1	0	0	0	0	0	0	0	0	0	0	0	0	0	0	0	0	0	0
2700070H01Rik	NR_046019	5.87	3.17	6.74	4.85	10.23	7.5	7.62	4.44	2.88	2.59	14.03	7.05	6.41	2.46	3.45	2.63	2.61	6.29	3.36	0.73	0.46	0.58	0.37	1.4	0.43	6.75	0.54	0.36	0.58	0.26	1.34	1.62	1.96	0.47	0.41	1.67	1.78	1.36	5.86	5.46	6.3	6.91	6.99	5.18	3.18	5.04	6.69	4.44
2700081O15Rik	NM_175381	2.67	4.62	3.46	3.1	4.48	4.18	5.71	3.21	5.95	5.15	3.2	4.47	5.3	4.13	4.14	4.93	4.18	5.52	3.9	3.06	3.78	2.84	4.58	3.1	2.62	3.33	3.21	2.88	4.15	3.52	2.77	3.7	3.85	3.26	2.95	4.7	2.55	3.33	5.5	6.39	3.62	6.18	4.15	6.55	3.65	4.36	6.07	5.88
2700089E24Rik	NM_001163445,NM_001271582,NM_001271583,NR_073368	45.35	36.89	32.4	35.45	39.93	29.87	37.35	37.17	45.21	32.31	33.57	36.89	29.87	47.21	44.75	32.56	36.11	37.32	40.05	48.65	42.83	36.59	35	47.32	27.82	47.41	48.87	43.69	51.35	41.61	47.49	40.79	42.99	54.64	56.23	41.07	41.65	47.3	65.85	69.15	55.33	50.41	63.36	63.76	54.01	51.5	65.37	63.27
2700089I24Rik	NR_045308	0.1	0	0	0	0	0	0.09	0	0.06	0	0.04	0	0	0.06	0	0	0	0	0	0.1	0.53	0.04	0.07	0.21	0	0.5	0.22	0	0.06	0.08	0.06	0.21	0.23	0.06	0.16	0.1	0.64	0.1	0.11	0.11	0	0.18	0.05	0.16	0.05	0.06	0	0
2700094K13Rik	NM_001033166,NM_001037279	33.09	49.18	34.24	37.57	38.75	30.48	31.08	44.38	29.03	40.53	31.07	36.55	31.97	39.61	36.66	41.04	39.52	36.09	37.83	42.41	28.54	41.21	45.96	25.89	39.92	24.5	32.98	41.66	29.74	36.88	31.55	26.23	29.97	41.24	32.72	39.12	25.22	29.77	23.09	30.11	28.15	19.37	28.83	21.86	29.36	18.75	32.26	18.28
2700097O09Rik	NM_028314,NR_030764	6.29	5.04	5.24	4.36	5.74	4.25	5.52	7.34	5.4	4.62	4.02	4.39	6.72	8.41	5.36	4.11	4.89	3.82	8.84	5.52	5.56	4.62	5.22	4.44	3.79	6.79	8.9	4.55	3.04	6.45	4.7	3.84	5.33	4.14	4.31	4.93	7.02	5.39	4.3	4.62	3.92	4.65	4.34	3.14	4.27	4.51	3.58	3.62
2700099C18Rik	NR_024720	1.15	1.22	0.66	5.45	1.33	1.38	1.55	1.84	2.24	1.48	1.54	1.87	2.9	3.57	1.5	2.08	2.11	2.01	3.12	0.58	0.83	0.81	0.46	0.93	1.42	1.17	1.73	0.5	0.53	1.02	1.06	0.7	0.72	1.06	1.25	0.82	0.15	0.91	0.7	0.73	0.49	1.3	0.67	0.69	0.66	0.85	0.39	1.07
2810001G20Rik	NR_033780	27.24	29.59	24.48	39.78	33.87	24.46	29.41	41.3	26.61	39.27	26.5	29.37	27.83	47.83	40.71	34.91	44.75	26.66	28.09	17.22	17.71	19.72	20.32	13.61	16.93	14.53	22.03	18.23	15.46	19.56	18.97	10.67	15.9	17.01	15.97	17.65	15.49	16.71	5.15	6.7	7.63	6.77	7.09	7.59	7.52	9.99	8.68	6.94
2810002D19Rik	NR_027831	0.74	1.66	1.87	0.4	1.39	1.17	1.61	1.43	1.57	1.06	1.37	1.39	0.99	1.64	1.2	1.78	1.4	1.35	1.78	1.42	0.65	0.74	0.04	0.4	0.95	0.25	0.92	0.69	1.29	0.77	0.87	0.66	0.84	0.08	0.58	0.43	0.39	0.84	0.93	0.76	1.25	1.27	0.77	0.68	1.32	2.9	1.65	1.14
2810004N23Rik	NM_025615	18.85	18.28	15.42	24.93	13.44	13.07	17.29	14.27	17.7	12.32	15.25	14.35	14.74	15.27	13.95	15.02	12.57	15.3	18.24	16.69	16.94	13.6	11.74	15.66	9.25	13.41	20.12	13.63	14.84	9.96	15.69	17.99	16.26	17.65	16.86	14.23	19.87	16.05	21.21	20.91	21.14	18.23	21.87	19.31	15.94	19.99	25.08	20.03
2810006K23Rik	NM_001134717,NM_028310	16.73	15.57	14.69	9.67	13.61	12.83	13.6	11.35	12.32	12.7	11.42	12	13.65	13.23	12.23	9.58	10.04	14.76	12.66	14.75	14.6	13.46	10.81	13.63	9.35	15.16	11.31	11.8	12.62	13.05	13.62	15.39	14.95	15.33	14.04	12.07	15.2	13.74	18.04	15.77	15.77	17.09	18.26	18.1	15.95	17.51	15.94	14.97
2810007J24Rik	NM_001199306,NM_175250	0	0	0	0	0	0	0	0	0	0	0	0	0	0	0	0	0	0	0	0	0	0	0	0	0	0	0.06	0	0	0	0.03	0	0	0	0	0	0	0	0	0	0	0	0	0	0	0	0	0
2810008D09Rik	NR_027059	24.52	28.3	41.13	54.35	61.95	40.68	41.45	113.69	35.75	75.7	50.89	57.69	54.38	87.18	22.72	53.57	67.1	63.79	116.03	12.61	13.39	29.77	18.5	17.47	19.81	14.83	62.03	20.11	11.29	19.85	18.64	12.17	16.36	15.44	13.07	12.47	16.78	11.88	15.91	26.84	35.6	33.35	25.81	20.32	19.08	32.63	30.31	20.03
2810013P06Rik	NR_045268	9	9.15	7.91	11.21	11.37	7.74	9.35	12.05	9.93	8.67	7.26	8.14	8.54	11.97	7.66	8.12	9.01	9.74	11.56	12.3	9.56	10.68	10	11.3	7.01	10.91	17.02	11.67	11.02	12.05	10.06	8.05	10.51	11.09	11.47	9.47	11.67	9.47	10.91	10.52	11.78	9.17	10.29	11.07	9.26	10.66	9.66	9.67
2810021J22Rik	NM_172403	1.69	1.59	1.15	1.74	1.04	1.29	2.01	2.43	1.59	1.51	1.23	1.5	1.44	2.36	1.02	1.49	1.41	2.08	2.56	2.04	2.08	1.36	1.5	1.45	0.84	2.04	3.64	1.38	1.75	1.77	1.65	1.89	1.96	1.54	1.98	1.76	2.02	1.57	3.56	3.95	3.27	3.41	3.77	4.25	2.43	3.8	3.31	4.44
2810025M15Rik	NR_027984	12.47	14.67	10.61	9.33	11	12.18	12.65	12.8	10.1	14.48	11.16	9.98	20.49	14.92	14.78	12.02	14.7	12.84	12.05	10.21	10.13	11.38	14.76	8.71	12.53	10.79	12.36	11.48	12.34	13.78	10.6	8.88	10.58	8.32	11.96	12.6	10.04	11.31	8.26	7.49	6.34	9.02	7.69	7.1	8.73	9.56	7.34	8.88
2810029C07Rik	NR_045295	0.79	0.71	0.98	0.9	0.57	1.03	1.25	1.29	0.72	1.11	0.65	0.6	1.49	1.84	0.78	0.94	0.96	0.59	1.59	0.19	0.37	0.24	0.1	0.05	0.65	0.28	0.48	0.28	0.23	0.23	0.26	0.25	0.21	0.51	0.29	0.61	0.15	0.36	0.6	0.78	0.57	0.2	0.46	0.73	0.38	0.91	0.6	1.03
2810032G03Rik	NR_015579	1.75	1.41	1.14	0.63	1.4	1.15	0.75	1.69	1.54	1.5	0.92	1.1	0.91	1.41	1.42	0.74	0.76	1.42	1.78	1.61	0.71	1.2	1.75	0.86	1.65	0.97	2.85	1.45	1.26	1.34	1.52	1.26	1.33	1.79	2.43	1.03	1.4	1.84	1.58	1.55	0.82	1.73	2.51	1.16	1.49	2.1	1.25	1.36
2810047C21Rik1	NR_015598	1.91	1.85	1.88	0.57	2.53	1.56	2.75	1.82	0.57	1.61	2.25	2.5	1.48	1.48	1.83	1.68	0.86	1.9	3.31	2.05	2.09	2.02	0.78	1.98	1.23	2.7	1.73	1.6	1.76	0.75	1.64	1.42	2.17	3.54	0.98	1.3	2.89	2.86	2.39	1.83	2.53	2.17	2.13	2.31	2.34	1.5	2.89	2.05
2810049E08Rik	NR_036594	0.08	0	0	0	0	0	0.08	0	0	0.07	0.06	0.09	0	0	0	0	0.08	0.07	0	0	0	0	0	0	0	0	0	0.07	0	0	0	0	0	0	0	0	0	0	0	0	0	0	0.04	0	0	0	0	0
2810403A07Rik	NM_028814	35.38	25.36	30.9	30.45	42.84	40.19	48.05	33.72	37.02	30.69	32.24	47.1	54.99	43.24	30.23	28.56	26.83	49.09	41.59	21.48	27.01	22.04	25.82	36.09	17.67	43.61	41.41	19.47	24.12	25.66	32.32	35.88	41.48	24.69	26.56	27.68	36.12	34.92	42.39	41.98	35.66	36.84	36.01	41.66	37.15	37.92	39.76	42.49
2810403D21Rik	NR_015493	3.23	1.49	2.04	2.19	2.66	3.18	2.61	2.66	3.18	1.03	1.72	2.5	3.4	1.46	3.12	1.47	2.18	1.96	2.59	2.96	1.47	1.6	1.11	2.48	1.31	2.09	1.25	1.51	2.5	1.38	2.89	1.4	2.54	2.72	3.08	2.22	2.07	4.14	1.3	2.06	0.94	1.61	1.34	1.03	1.13	2.53	1.78	1.54
2810404M03Rik	NR_045497	0	0	0	0	0	0	0	0	0	0	0	0	0	0	0	0	0	0	0	0	0	0	0	0	0	0	0	0	0	0	0	0	0	0	0	0	0	0	0	0	0	0	0	0	0	0	0	0
2810405F15Rik	NR_033447	0	0.05	0	0	0.04	0.04	0.05	0.05	0	0	0	0	0.05	0.07	0	0	0	0.05	0	0.3	0.47	0.15	0.54	0.25	0	0	0	0.25	0	0.15	0.11	0.13	0.27	0.14	0	0.35	0	0.06	0	0.33	0.07	0.06	0.03	0.09	0.12	0.15	0	0.22
2810408A11Rik	NM_027419	4.77	4.11	4.5	4.71	4.36	5.06	5.17	6.06	4.64	3.77	5.09	5.26	11.87	7.4	4.24	4.79	5.49	5.78	6.57	11.57	9.54	11.66	9.79	10.27	9.32	12.12	14.93	13.12	11.96	10.88	11.63	11.57	10.44	13.22	11.24	9.34	8.47	10.3	21.88	21.98	22.24	15.98	23.7	18.39	21.58	21.18	20.97	19.54
2810408I11Rik	NR_038009	3.86	3.17	5.78	4.01	5.21	4.17	4.29	4.8	3.26	2.86	3.66	4.36	7.55	5.03	3.81	3.46	4.52	4.44	5.65	2.92	3.4	2.88	1.22	3.01	4.56	3.05	4.23	6.03	3.94	4.31	3.35	4.65	4.79	3.74	4.88	5.85	3.69	4.44	3.45	3.99	4.85	3.43	4.13	3.83	3.13	2.59	5.14	4.21
2810408M09Rik	NM_001007581	9.51	9.9	8.37	10.29	8.68	8.77	8.56	9.13	8.49	7.31	6.33	8.69	9.06	11.66	9.41	9.45	8.11	8.49	9.27	14.13	13.34	11.75	16.38	12.68	9.52	11.57	11.9	13.71	13.75	13.28	10.2	13	11.6	14.91	10.96	11.91	11.85	10.93	12.05	11.82	11.57	9.04	11.03	11.41	9.77	11.53	12.24	11.43
2810410L24Rik	NR_030682	3.3	2.83	3.04	4.96	3.28	2.23	2.88	3.52	3.95	3.33	3.01	2.92	2.66	2.95	2.7	3.23	2.71	2.74	3.27	0.37	0.56	0.55	0.15	0.29	0.3	0.38	0.8	0.73	0.52	0.84	0.1	0.06	0.19	0.46	0.42	0.43	0.11	0.62	0.86	0.54	0.6	0.39	1.19	0.51	0.11	0.56	1.48	0.3
2810417H13Rik	NM_026515	2.11	1.54	1.35	1.97	1.11	1.38	1.27	0.72	1.97	0.81	1.46	1.13	0.77	1.68	1.18	1.42	1.07	1.27	1.13	1.91	1.5	2.03	2.14	1.34	2.33	1.11	1.41	1.44	1.92	1.82	1.64	1.45	1.48	1.45	3.39	2.36	0.36	1.68	1.52	1.7	1.65	0.94	1.33	1.91	1.04	1.73	1.78	1.47
2810428I15Rik	NM_025577	77.7	92.72	92.08	141.08	104.15	66.39	79.72	112.83	78.17	138.09	90.07	95.21	80.66	91.78	100.69	117.24	127.24	95.28	94.5	91.98	83.85	116.38	129.1	89.74	107.8	68.21	84.08	99.45	87.7	110	92.75	90.88	76.21	102.66	84.4	90.22	78.65	86.17	95.81	96.31	104.29	140.81	106.89	81.87	92.63	104.47	113.12	78.51
2810429I04Rik	NR_015522	0	0.51	0	0	0.57	0.55	0.47	1.19	0.74	0.85	0.12	0.18	0	1.41	0	0	0.31	0.43	0.15	0	0	0	0	0	0	0	0	0	0	0	0	0	0	0	0	0	0	0.16	0.18	0	0	0	0	0	0	0	0.04	0
2810433D01Rik	NR_033474	0.75	0.64	0.32	1.93	0.38	0.45	0.32	0.33	0.84	1.24	0.31	0.35	0.43	0.5	0.54	0.89	1.3	0.7	0.68	0.55	0.9	0.65	0.53	0.37	0.19	0.77	0.72	0.59	0.93	0.57	0.3	0.37	0.57	0.76	0.65	0.55	0.74	0.67	0.22	0.62	0.31	1.49	0.36	0.76	0.63	0.72	0.44	0.77
2810442N19Rik	NR_040562	0.1	0	0	0.22	0	0.07	0.1	0.08	0	0	0	0	0	0	0	0	0.58	0.17	0.18	0	0	0	0	0	0	0.1	0	0	0	0.08	0.06	0	0	0	0.16	0	0.11	0.2	0.22	0	0	0.48	0	0	0	0	0	0
2810454H06Rik	NR_029441	0.54	0.59	0.61	0.69	0.85	0.56	0.83	0.96	0.7	0.84	0.59	0.85	0.59	0.92	0.21	0.73	0.69	0.86	1.55	0.99	1.26	0.57	0.83	1.26	0.98	1.18	2.32	1.26	1.25	0.98	1.05	0.68	1.01	1.06	1.2	1.63	2.44	1.16	0.96	1.21	1.46	0.89	1.13	1.05	0.91	1.21	1.26	0.77
2810459M11Rik	NM_001144992,NM_001144993	32.06	35.92	29.19	29.49	47.97	26.84	43.46	56.54	41.68	31.74	31.81	39.51	35.01	75.9	52.51	30.82	40.24	31.11	32.98	0.03	0.12	0.02	0.02	0.29	0.11	0.08	0.84	0.12	0	0.07	0.31	0.03	0.12	0.07	0	0.08	0.49	0.1	1.14	0.27	0.66	0.48	1	0	0.08	0.28	2.63	1
2810468N07Rik	NR_045176	0.14	0.63	0.19	1.03	0.61	0.27	1.02	0.6	0.9	0.64	0.15	0.37	0.55	0.57	0.44	0.88	1.15	0.23	0.37	0.95	2.28	1.11	2.3	0.36	0.96	0.55	2.14	0.88	1.59	2.2	0.58	0.73	0.74	0.67	1.29	1.09	0.58	1.51	0.66	0.76	0.61	0.47	0.81	1.72	0.55	0.89	0.51	0.63
2810471M01Rik	NR_045906	0	0.02	0	0	0	0	0	0	0	0	0	0	0	0	0	0	0	0	0	0	0.05	0	0.08	0.06	0	0	0	0	0	0.05	0	0	0.05	0	0	0.06	0.03	0	0	0.19	0.06	0	0.01	0	0	0.07	0.18	0.06
2810474O19Rik	NM_001289661,NM_001289662,NM_026054	7.24	6.65	4.85	5.53	6.88	6.12	9.49	6.53	9.02	5.54	5.95	8.38	8.97	9.7	6.11	6.25	5.07	8.54	6.23	33.7	35.12	18.69	23.8	43.51	15.34	53.39	42.84	26.58	35.22	28.11	36.6	45.27	49.69	40.36	45.09	30.38	44.66	38.68	29.82	24.6	12.46	18.81	21.95	32.4	18.55	24.8	22.23	30.93
2900005J15Rik	NR_027851	0.89	1.2	1.35	1.16	2.77	1.91	1.86	4.61	2.37	0.99	1.69	2.69	2.25	4.87	0.98	1.74	1.47	2.06	5.1	0.4	1.3	0.5	1.48	1	0.62	2.02	3.05	0.61	0.71	1.33	0.98	1.09	0.85	0.88	1.4	0.72	1.66	1.25	0.67	1.3	0.5	0.99	0.7	0.91	0.23	0.41	0.81	0.74
2900008C10Rik	NR_045434	0.34	0.42	0.25	1.02	0.18	0.31	0.32	0.86	0.67	0.87	0.6	1.31	0.36	0.57	0.79	1.07	0.7	0.51	0.55	0.07	0.12	0.12	0.43	0.29	0.28	0.14	0.1	0.41	0	0.28	0.33	0.22	0.12	0	0.11	0.41	0.22	0.33	0.07	0.08	0.15	0.18	0.18	0	0.07	0.18	0.14	0.25
2900009J06Rik	NR_045298	0.17	0.33	0.2	0	0.59	0.14	0.41	0.51	0.48	1.84	1.27	0.47	0.58	1.05	0.83	0.31	0	0.55	1.15	0	0.19	0.74	0	0.23	0.62	0.46	0.65	0	0.53	0.35	1.05	0.47	1.39	1.29	0.34	1.06	0.45	0.85	0.23	0.47	0.74	0	0.22	1.03	0.22	0.27	0	0
2900011O08Rik	NM_144518	0	0.12	0.04	0	0	0.03	0	0	0	0	0.03	0	0.56	0.05	0	0.17	0	0.03	0.03	0.09	0.04	0.03	0	0.04	0	0.04	0	0	0.05	0	0.07	0	0.03	0	0	0	0	0.04	0	0.09	0.04	0	0.02	0	0	0.08	0.12	0.35
2900026A02Rik	NM_172884	4.96	4.78	3.9	4.51	5.48	3.91	6.44	5.75	5.95	4.68	3.93	4.6	3.84	8.28	6.7	4.76	4.53	5.71	5.54	6.73	8.21	4.37	7.22	7.55	3.45	10.51	12.24	5.57	9.54	7.6	6.78	9.94	8.68	8.91	11.17	7.11	8.8	6.99	9.86	10.1	3.5	8.83	7.36	14.01	5.52	9.11	9.22	12.82
2900041M22Rik	NR_015489	0.2	0.26	0.25	1.03	0.19	0.31	0.13	0.65	0.91	1.93	0.3	0.44	0.12	0.16	0	1.08	1.22	0.52	0.12	0.68	1.14	0.82	1.25	0.44	0.77	0.49	0.82	1.17	0.67	0.51	0.92	0.66	0.44	0.75	0.65	1.57	0.73	0.99	0.15	0.69	0.08	0.29	0.28	0.54	0.56	0.18	0.51	0.51
2900052N01Rik	NR_015605	0	0.13	0.06	0	0.06	0.02	0	0	0.04	0.12	0.03	0	0.03	0.04	0.09	0.05	0	0	0.13	0.21	0.09	0	0.23	0.22	0.05	0.17	0.31	0.1	0.13	0	0.12	0.13	0.14	0.04	0.22	0	0.07	0.2	0.04	0.18	0.04	0.06	0.22	0.06	0.25	0.14	0.24	0.08
2900055J20Rik	NR_045177	0	0	0	0	0	0	0	0	0	0	0	0	0	0	0	0	0	0	0	0.13	0	0	0	0	0	0	0	0	0	0	0	0	0	0	0	0	0	0.13	0.14	0	0	0	0	0	0	0	0.14	0
2900057B20Rik	NR_045365	0	0	0	0	0	0.06	0	0	0	0.08	0	0	0	0.11	0	0	0	0	0	0	0	0	0	0	0	0.09	0	0	0.11	0	0	0	0	0	0	0	0	0	0	0	0.1	0	0	0	0.28	0	0	0
2900060B14Rik	NR_027901	0.81	0.25	0.3	0.69	0.33	0.43	0.92	0.78	0.36	1.11	0.6	1.24	0.44	0.39	0.21	0.7	0.61	0.28	0.44	0.64	0.43	0.28	1.93	0.35	0.23	0.51	0.98	0.83	0.2	0.13	0.1	0.71	0.45	0.2	0.52	0.16	0.17	0.48	0.17	0.54	0.18	0.93	0.58	1.03	0	0.84	0.69	0.9
2900076A07Rik	NR_045299	13.7	14.85	12.96	17.73	17.02	14.42	13.15	17.3	16.71	15.56	12.15	15.5	16.36	19.47	15.69	15.23	17.83	14.49	16.75	6.47	9.18	8.54	8.2	6.26	6.24	7.71	12.25	7.15	7.57	8.57	6.27	3.81	6.56	5.77	7.32	7.8	7.03	6.01	12.09	14.92	16.54	12.49	12.17	11.89	16.27	16.14	14.13	14.89
2900079G21Rik	NR_015468,NR_033431,NR_033432,NR_033433	0	0	0	0	0	0	0	0	0	0	0	0	0.03	0	0	0	0	0	0	0	0	0	0	0	0.05	0.03	0.05	0	0	0	0	0	0	0	0	0	0	0	0	0	0	0	0	0	0	0	0	0
2900092C05Rik	NM_028434	0	0	0	0	0.08	0.07	0.1	0.09	0.12	0.19	0.25	0	1.58	0	0	0.16	0	0.19	0.3	0	0.1	0.1	0	0.12	0.31	0.11	0	0	0	0.09	0	0.48	0.1	0	0	0	0.24	0	0.12	0.37	0.12	0.06	0	0	0	0.57	0	0.41
2900092D14Rik	NR_027891	8.42	6.53	7.17	4.99	10.2	7.2	8.75	7.92	9.27	6.52	4.5	6.84	7.09	10.97	9.03	4.29	5.7	5.85	6.66	5.7	6.81	4.35	6.55	8	4.13	8.9	8.56	6.15	8.09	7.77	7.71	7.5	8.64	9.89	10.3	5.66	7.89	6.61	15.99	14.37	6.95	9.4	11.62	14.55	7.84	12.94	13.29	14.28
2900097C17Rik	NR_024329	55.61	52.07	40.85	42.73	53.28	48.05	56.44	67.25	61.21	42.36	39.4	49.44	45.42	76.47	55.31	49.62	41.1	49.1	56.95	61.29	67.87	43.14	57.48	55.24	39.32	65.21	73.63	55.91	68.79	59.33	55.94	53.04	62.11	68.93	72.35	54.6	70.08	52.96	80.93	79.38	43.48	65.31	63.62	87.92	52.7	68.77	75.72	84.56
3000002C10Rik	NR_033215	2.72	2.58	2.41	4.68	2.84	2.71	3.66	4.19	3.15	2	2.16	3.67	3.55	2.83	1.38	3.42	2.15	4.03	4.91	1.37	2.7	1.28	1.92	2.06	2.96	3	3.42	1.54	2.74	1.93	2.67	2.13	3.39	1.46	1.22	2.02	2.28	1.35	3.23	4.26	4.7	4.56	4.85	4.32	3.59	5.63	4.97	4.7
3010001F23Rik	NR_045451,NR_045452	0.11	0.33	0.1	0.7	0.29	0.28	0.4	0.34	0.12	1.11	0.4	0.24	0.29	0.26	0	1.73	0	0.27	0.1	0.42	0.09	0.46	0.77	0	0.46	0.22	0.49	0.92	0	0	0.39	0.81	0.59	0.52	0.34	0.64	0.11	0.11	0.23	0.36	0.37	0.17	0.22	0.17	0.55	0	0.23	0
3010026O09Rik	NM_026543	7.84	8.17	8.65	4.2	8.94	8.92	7.97	8.47	9.43	9.03	7.94	9.36	12.1	9.2	8.1	11.11	8.79	7.97	10.74	10.31	9.92	10.41	12.28	9.57	10.42	10.18	13.97	8.28	11.16	12.04	9.74	8.29	10	8.44	13.08	9.34	11.32	9.05	10.85	7.6	10.22	13.27	11.14	8.61	8.84	10.14	9.81	11.12
3010033K07Rik	NR_077224	0	0	0	0	0	0	0	0	0.12	0	0	0	0	0	0	0	0	0	0	0	0	0	0	0	0	0	0	0	0.13	0	0	0	0	0	0	0	0	0	0	0	0	0	0	0	0	0	0	0
3100003L05Rik	NR_045907	0.14	0.22	0.13	0	0.1	0.38	0	0.35	0.48	0	0	0	0	0	0	0	0	0	0	0	0.13	0	0	0	0	0	0	0	0	0	0.18	0	0	0	0	0.14	0.15	0	0	0	0.16	0	0.07	0	0	1.12	0.31	0.54
3110001I22Rik	NM_025653	4.91	3.75	5.25	4.53	6.12	5.34	5.38	2.52	4.95	4.17	3.95	4.68	6.35	4.29	4.19	4.82	3.31	4.2	2.6	3.69	4.54	3.22	2.8	7.83	4.37	11.75	4.14	3.56	4.52	5.87	5.72	7.87	9.74	3.61	4.82	6.25	7.54	6.45	6.61	6.21	4.57	5.87	4.82	5.28	6.62	7.47	3.94	5.24
3110002H16Rik	NM_029623	16.72	16.18	15.85	12.51	18.29	17.5	18.26	15.73	19.03	17.18	15.02	20.19	17.41	22.54	21.45	18.9	19.71	17.86	14.1	11.7	12.43	11.32	9.62	10.46	8.97	13.12	13.93	11.93	14.15	12.67	12.77	13.62	14.17	12.55	15.43	12.16	12.15	14.45	16.41	16	14.79	14.23	14.33	17.03	14.76	16.41	16.29	15.02
3110007F17Rik	NM_028426	1.11	0.7	0.84	1.31	0.77	0.87	0.96	0.65	1.8	1.65	0.98	0.55	1.27	1.23	1.45	1.76	0.57	1.21	1.74	1.12	1.79	1.14	1.5	0.98	1.87	1.25	2.6	1.22	1.5	2.11	2.18	1.1	1.58	1.99	1.45	1.83	2.17	2.38	0.11	1.47	0.69	0.37	1.05	0.65	1.76	1.32	1.2	1.51
3110009E18Rik	NM_001172074,NM_028439	8.58	8.11	11.98	5.92	7.12	8.77	9.69	6.6	8.17	12.28	6.1	8.15	8.89	8.71	5.81	10.45	8.26	8.11	9	9.93	9.3	10.29	5.55	6.83	7.44	5.47	7.97	8.19	7.65	12.67	7.85	8.34	6.96	8.07	10.9	7.74	6.66	7.34	6.44	7.4	6.74	7.7	7.83	4.92	8.24	12.4	7.13	8.98
3110009F21Rik	NR_045466	0	0	0	0	0	0.04	0	0.04	0	0	0	0	0	0	0	0	0	0	0	0.06	0.05	0	0	0.06	0	0.11	0	0	0	0	0.07	0	0.1	0	0	0.11	0	0.05	0	0	0	0	0	0	0	0	0	0
3110015C05Rik	NR_045908	0	0	0	0	0	0	0	0	0	0.09	0	0	0.09	0	0.13	0	0	0	0.06	0.1	0	0	0	0	0	0	0	0	0	0	0	0.11	0	0	0	0	0	0	0	0.11	0	0	0	0	0.1	0	0	0
3110021A11Rik	NR_030776	0	0	0	0	0	0	0	0.09	0	0	0	0.12	0	0.14	0.59	0	0.43	0	0.31	0	0.2	0	0	0.12	0.16	0.12	0	0.29	0	0.09	0.14	0	0	0	0	0.11	0	0.22	0.12	0.13	0	0	0.12	0	0.23	0	0	0
3110021N24Rik	NM_001254730	0.8	1.09	0.6	0.65	0.86	0.43	0.93	0.44	1.5	0.09	1.3	0.92	0.63	0.84	0.41	0.51	0.8	0.97	0.72	0.65	0.75	0.47	0.25	0.32	0.07	0.61	1.34	0.39	0.8	0.21	0.43	0.48	0.32	0.68	1.03	0.45	0.91	0.73	1.41	1.25	0.39	0.34	0.86	1.9	0.15	0.79	0.91	1.86
3110035E14Rik	NM_178399	0	0	0.03	0	0	0	0.03	0	0	0.05	0.02	0.06	0.13	0	0	0	0.05	0.07	0.03	0.03	0.02	0	0	0.18	0	0.17	0.29	0.02	0.14	0.05	0.07	0	0.1	0.03	0.04	0.03	0.21	0.05	0.03	0.09	0.09	0.19	0.01	0.18	0.06	0.33	0.03	0.26
3110039I08Rik	NR_040725	0	0.1	0	1.12	0	0	0	0	0.14	0.11	0.1	0	0.12	0	0	0	0	0	0	0	0	0	0	0	0.19	0	0	0	0	0	0	0.14	0	0	0	0	0	0	0	0	0.15	0	0	0	0.13	0	0	0
3110039M20Rik	NR_026733	0	0	0	0	0	0	0	0	0	0	0	0	0	0	0	0	0	0	0	0	0	0	0	0	0	0	0	0	0	0	0	0	0	0	0	0	0	0	0	0	0	0	0	0	0	0	0	0
3110040N11Rik	NM_026077	16.82	15.47	16.45	14.37	16.73	19.59	17.85	20.56	15.8	20.01	14.46	17.94	16.5	19.39	18.05	20.86	19.93	15.37	18.46	20.23	23.1	23.35	21.35	18	20.99	15.47	25.89	18.09	19.4	21.62	18.27	17.92	19.1	18.86	21.37	17.83	14.94	18.07	19.61	25.09	21.68	23.5	23.51	24.73	25.48	25.33	24.29	24.6
3110043O21Rik	NM_001081343	11.1	11.92	8.49	7.91	10.65	10.42	11.94	7.9	12.03	11.75	7.49	10.44	10.49	11.94	9.84	10.28	9.92	10.82	7.21	9.49	8.71	7.4	10.81	9.96	5.84	10.79	6.91	7.83	11.88	10.57	11.3	10.02	12.53	8.8	9.7	11.06	12.23	11.54	11.02	10.71	9.79	10.73	10.45	13.96	10.12	8.34	9.1	13.02
3110045C21Rik	NR_040438	0.73	0.44	0.75	1.93	0.56	0.48	0.76	0.58	0.36	1.4	0.48	0.7	0.52	0.69	0.63	0.95	0.15	0.56	0.95	1.91	2.15	0.98	1.49	2.11	1.87	2.74	2.44	1.21	1.6	1.55	1.75	2.37	2.7	1.51	1.03	2.04	1.91	2.29	1.41	1.18	2.02	0.52	1.22	1.16	1.41	1.59	0.96	1.81
3110052M02Rik	NM_001166497	2.96	2.03	2.35	3.37	3.11	2.45	3.04	3.04	3.12	1.86	2.3	3.31	3.23	3.36	1.91	2.56	2.24	2.67	3.45	1.99	1.83	1.95	2.27	2.32	1.32	2.45	3.17	2.16	1.65	1.54	2.26	2.23	2.52	2.7	3.07	1.92	2.42	2.25	3.16	3.22	2.25	2.01	3.05	3.63	3.39	2.99	3.17	4.78
3110056K07Rik	NR_045055,NR_045056	6.2	5.37	5.9	5.04	7.42	6.31	5.97	7.42	6.81	6.97	6.33	6.53	9.09	9.91	5.58	4.18	6.91	6.77	8.82	3.92	3.85	5.46	2.67	2.59	3.41	4.45	7.03	4.39	4.46	2.61	3.71	2.6	4.31	3.06	2.84	2.74	5.43	4.01	7.2	6.47	8.49	3.73	6.81	6.51	8.39	4.44	5.18	6.57
3110057O12Rik	NM_026622	1.71	1.65	0.76	0.71	1.24	1.43	1.66	1.08	1.81	1.02	1.39	1.77	2.1	2.24	0.7	1.27	0.78	1.77	1.67	0.98	1.72	0.81	0.48	1.47	0.41	1.38	2.06	0.91	0.87	0.7	1.13	1.21	0.98	0.93	1.38	0.87	0.94	1.31	1.57	1.97	0.81	1.27	1.24	1.35	0.97	1.44	1.12	2.06
3110062M04Rik	NM_001135611,NM_199145	1.51	1.87	1.55	1.11	1.96	1.04	0.95	2.48	2.39	1.32	1.42	1.76	2.06	1.73	2.19	1.27	1.66	2.3	2.44	2.62	2.26	1.99	4.62	2.51	1.17	2.5	3.42	3.18	1.46	3.01	2.64	1.94	1.8	1.77	1.64	2.68	2.28	1.82	2.28	2.04	1.67	2.95	2.17	2.05	1.93	2.61	2.13	2.46
3110070M22Rik	NR_027974	1.48	2.28	2.34	3.36	2.36	2.33	2.53	3.73	2.3	3.72	2.46	2.57	7.65	2.49	2.35	2.96	2.55	3.42	2.37	2.82	2.76	1.98	2.45	1.5	2.55	1.43	2.35	2.26	2.82	2.32	1.72	1.87	1.8	1.31	3.37	2.38	0.96	1.6	1.86	1.46	1.58	2.93	1.82	2.36	1.67	3.11	1.76	1.68
3110079O15Rik	NM_028473	0	0	0	0	0	0	0	0	0	0	0	0	0	0	0	0	0	0.19	0	0	0	0	0	0	0	0	0	0	0	0	0	0	0	0	0	0	0	0	0	0	0	0	0	0	0	0	0	0
3110082I17Rik	NM_028469	10.49	9.78	10.76	9.2	12.13	10.02	10.82	12.57	10.26	10.51	9.57	8.62	10.11	11.54	11.39	11.29	7.85	10.9	11.29	8.92	7.55	5.66	7.6	6.18	7.58	5.91	9.54	5.28	9.16	7.28	7.21	7.18	6.63	5.99	8.2	9.49	6.74	7.57	5.41	5.6	4.21	5.61	5.27	4.16	4.6	6.79	5.09	4.64
3110082J24Rik	NM_001256263	0	0	0	0	0	0	0	0	0	0	0	0	0	0	0	0	0	0	0	0	0	0	0	0	0	0	0	0	0	0	0	0	0	0	0	0	0	0	0	0	0	0	0	0	0	0	0	0
3110099E03Rik	NR_030712	0	0	0	0	0	0.02	0	0	0	0	0	0	0	0.04	0	0	0	0.06	0.03	0.1	0	0	0	0.07	0.05	0	0.05	0	0	0.03	0	0.07	0.03	0	0	0	0	0.07	0.07	0.04	0	0.13	0	0.05	0	0	0	0.13
3200001D21Rik	NR_045888	0.12	0.06	0.04	0	0.05	0	0.07	0	0.04	0.14	0.03	0.04	0.04	0	0.1	0.23	0	0.17	0.07	0	0	0	0.11	0.08	0	0	0	0.07	0.1	0.07	0.02	0	0.04	0	0.06	0	0	0.08	0.17	0	0	0.13	0.02	0	0	0	0.08	0
3300002I08Rik	NM_027017	1.03	0.68	1.23	2.85	1.4	0.66	0.84	1.42	1.75	1.53	0.43	0.81	2.13	1.63	0.6	0.64	1.39	2.15	0.93	1.76	3.69	1.92	0.83	2.39	1.81	3.77	2.57	1.72	0.73	2.32	2.14	2.02	2.15	1.31	0.94	2.06	1.86	2.47	0.67	1.23	1.04	0.93	1.09	1.18	1.07	0.42	1.9	1.92
3300002P13Rik	NR_126426	0	0	0	0	0	0	0	0	0	0	0	0	0	0	0	0	0	0.07	0	0	0	0	0	0	0	0	0.51	0.07	0	0	0	0	0	0	0	0	0	0.41	0	0	0	0	0	0	0	0	0	0
3300005D01Rik	NR_045079,NR_045080,NR_045081	0.24	0.54	0	0	0.25	0.33	0	0.19	0.14	0.08	0.21	0	0.08	0	0	0.35	0.34	0.42	0.08	0.24	0.47	0.32	0.26	0.26	0.35	0	0.27	0.13	0.29	0.69	0.07	0	0	0	0	0.39	0.26	0.6	0.13	0.3	0.18	0.32	0.33	0.25	0.25	0	0.08	0.73
3425401B19Rik	NM_001195097	0.02	0.02	0	0	0	0	0	0.01	0	0	0	0	0	0.02	0	0.05	0	0.01	0.01	0	0.01	0	0	0	0	0	0.52	0.1	0.02	0.13	0	0	0	0	0	0	0	0.15	0.05	0	0.11	0.05	0.11	0.03	0	0	0	0
3632451O06Rik	NM_026142	6.43	7.17	7.27	5.32	3.56	6.23	6.11	4.45	7.38	4.93	4.76	5.85	6.69	3.02	3.06	5.38	3.77	6.69	7.56	3.36	5.54	3.43	4.05	3.19	3.89	3.52	4.96	3.11	5.75	5.14	2.73	2.23	3.74	3.06	4.69	4.11	2.76	5.79	2.48	2.97	2.34	2.93	2.86	3.77	2.56	2.1	4.14	4.84
3632454L22Rik	NR_040281,NR_040282,NR_040283	0	0	0.07	0.28	0.08	0.02	0	0	0	0	0.04	0.03	0.02	0.03	0	0.04	0.07	0.04	0.07	0.03	0.07	0	0	0	0	0.07	0	0.02	0	0.04	0.04	0	0.02	0.09	0	0.08	0.05	0.05	0	0.14	0	0.05	0.01	0	0	0.06	0	0.05
3830403N18Rik	NM_027510	0.48	0.3	0	1.37	0.25	0.32	0.11	1.08	0.95	1.22	0.07	0.12	0.19	0	0.41	0.66	0.43	0.56	0.41	1.09	0.66	0.24	0.51	1.77	1.87	0.56	0.85	0.34	0.47	0	0.26	0	0.67	0.56	1.78	0.66	0.13	1.29	0.49	0.3	0	0.81	0.19	0.86	0.5	1.1	0.2	0.71
3830406C13Rik	NM_001284383,NM_001284384,NM_001284385,NM_001284386,NM_001284387,NM_146051,NM_178141	28.43	22.15	26.24	23.92	23.52	25.93	28.3	24.5	25.21	20.72	23.63	26.13	25.71	30	20.19	20.8	20.15	27.12	26.4	24.76	21.89	22.58	17.94	23.95	14.89	21.81	28.08	21.63	22.29	24.06	21.69	22.05	22.66	23	27.05	22.68	23.78	24.04	28.76	25.12	27.84	23.39	29.13	30.06	30.1	32.18	29.4	28.54
3830408C21Rik	NR_015471	1.81	0.88	1.05	0.83	1.96	1.41	1.29	1.48	0.95	0.94	1.24	1.33	1.79	1.55	1.49	0.97	1.26	1.57	1.29	2.02	1.77	1.15	2.23	2.2	0.47	2.32	1.99	1.81	1.82	1.39	2.28	1.38	2.39	2.17	2.03	1.78	2.5	2.07	2.64	2.84	2.94	2.92	2.59	2.94	1.65	2.5	3.53	3.98
3830417A13Rik	NM_027512	0	0	0	0	0.04	0.04	0	0.04	0	0.09	0.2	0.06	0.39	0	0	0	0.05	0.05	0.1	0.06	0	0	0	0.06	0	0.11	0	0	0.14	0	0	0	0	0	0	0.11	0.06	0	0.12	0	0.06	0.2	0	0.09	0	0.07	0.3	0.2
3830432H09Rik	NR_126486	0	0	0	0	0.08	0.02	0.17	0	0	0	0.03	0.12	0	0	0.05	0	0	0.13	0	0.08	0	0	0	0.12	0	0.3	0	0	0	0	0.11	0.28	0.17	0	0	0.04	0.08	0.11	0.04	0	0	0.06	0	0	0	0.05	0	0.07
3930402G23Rik	NR_030715	0	0.02	0.03	0	0	0.02	0.12	0.05	0	0.05	0.02	0.03	0.03	0	0.25	0.05	0	0.08	0.09	0.03	0.03	0.05	0	0	0	0.06	0.14	0	0	0.1	0.02	0.13	0.03	0	0.05	0.13	0.03	0.18	0	0	0	0	0.03	0	0	0.08	0.07	0.12
4430402I18Rik	NM_198651	4.55	3.72	3.54	2.66	4.09	3.49	4.27	4.85	4.62	4.48	4.11	5.6	11.07	4.62	4.6	3.42	3.93	4.72	5.28	15.55	14.09	11.19	12.58	15.37	9.22	15.2	11.5	11.42	14.03	11.95	13.71	12.69	13.92	16.46	14.06	10.67	12.45	12.35	11.85	10.35	12.39	12.13	11.9	11.45	14.45	14.64	10.17	10.82
4631405J19Rik	NR_110333	0.37	0.23	0.69	0.16	1.38	0.89	0.56	1.01	0.99	1.15	0.61	0.89	0.73	1.99	1.46	1.62	1.9	0.76	0.67	0.45	0.2	0.39	0.26	0.96	0.32	0.69	0.9	0.45	0.46	0.19	0.41	0.88	0.34	0.46	0.12	0.97	0.24	0.87	0.08	0.17	0	0.16	0.12	0.24	0.23	0.68	0.4	0.28
4632415L05Rik	NR_027985	5.61	5.42	4.6	2.55	6.04	5.09	5.45	7.57	5.81	4.01	3.75	4.4	5.28	7.73	5.59	5.41	3.76	4.95	6.7	4.79	5.58	4.31	4.28	4.93	2.87	3.78	6.27	5.29	4.58	4.93	5.1	4.3	4.7	5.7	4.83	4.47	5.1	4.53	6.4	7.04	5.01	5.37	6.78	6.94	4.37	5.73	5.91	6.61
4632427E13Rik	NR_015510	0.71	1.53	1.45	1.53	0.49	1.14	1.9	0.8	1.9	0.61	1.27	0.78	1.29	1.57	1.11	1.65	0.54	0.85	1.42	0.57	0.5	0.62	0	1.54	1.02	0.6	0.43	0.73	0.35	1.07	1.05	0.78	0.92	0.87	0.91	0.71	0.46	0.84	0.77	0.63	0.32	0.45	0.52	0.23	0.58	0.74	0.61	0.27
4632428C04Rik	NR_033631	1.93	1.66	1.47	2.49	1.47	1.21	1.45	1.83	1.36	2.13	1.16	1.95	1.55	2.81	2.12	2.36	3.08	1.53	1.51	0.19	0.29	0.1	0.37	0.24	0.21	0.19	0.28	0.29	0.09	0.19	0.16	0.44	0.24	0.23	0.29	0.19	0.12	0.21	0.04	0.25	0.12	0.16	0.31	0.23	0.19	0.19	0.4	0.21
4632428N05Rik	NM_001159572,NM_028732	2.39	5.46	2.14	3.56	2.69	2.6	3.2	3.64	4.8	6.32	2.57	3.3	2.5	5.93	3.71	6.7	4.93	4.74	4.33	2.84	5.34	1.85	5.63	3.1	3.8	2.54	6.71	2.52	6.64	4.63	2.76	2.54	2.67	3.06	5.41	5.3	3.46	5.21	1.89	4.03	1.52	3.3	2.09	6.14	1.83	2.97	2.05	5.11
4732416N19Rik	NR_015615	0.74	0.72	0.94	0	0.67	0.65	0	1.18	0.48	0	0	0.84	0.98	0.47	1.71	1.69	0	0.09	0.83	2.07	3.09	0.69	1.17	1.78	0.4	1.21	0.87	1.88	1.72	0.6	0.39	1.8	0.76	1.52	0.37	1.79	1.68	0.35	1.46	1.89	2.51	1.92	1.58	0	1.45	3.21	1.22	1.95
4732456N10Rik	NM_177717	0	0	0	0	0	0	0	0	0	0	0	0	0	0	0	0	0	0	0	0	0	0	0	0	0	0	0	0	0	0	0	0	0	0	0	0	0	0	0	0	0	0	0	0	0	0	0	0
4732471J01Rik	NR_015569,NR_073027,NR_073028	0.04	0.29	0	0.2	0.16	0.05	0.2	0.03	0.32	0.06	0.34	0.16	0.39	0.44	0	0.59	0.07	0.21	0.21	0.09	0.17	0	0.07	0.23	0.17	0.31	0.7	0	0.33	0.06	0.08	0.14	0.52	0	0.11	0.1	0.3	0	0.47	0	0	0	0.08	0.22	0.08	0.15	0.11	0
4732490B19Rik	NR_040276	0	0	0	0	0	0	0	0	0	0	0	0	0	0.04	0	0	0.07	0	0	0.04	0	0	0	0	0	0	0	0	0	0	0.05	0	0	0	0	0.11	0	0	0	0	0	0	0	0	0.04	0	0	0
4732491K20Rik	NR_045290	1.07	1.07	0.91	1.04	0.72	1.11	1	1.17	1.22	0.82	0.63	1.18	0.83	1.32	1.1	0.69	1.09	0.81	1.07	0.46	0.6	0.32	0.38	0.48	0.43	0.26	0.76	0.78	0.38	0.45	0.35	0.39	0.46	0.45	0.4	0.77	0.15	0.41	0.8	0.86	0.95	1.15	1	0.67	0.89	1.81	1.06	0.58
4831440E17Rik	NR_030700	0.89	0.75	0.73	0.46	1.08	0.79	0.76	0.94	0.91	0.93	0.75	0.96	0.76	1.21	0.47	0.55	0.65	0.59	1.43	1.19	1.13	1.02	1.88	1.76	0.85	1.85	2.38	1.12	0.73	1.11	1.18	0.71	1.19	1.2	0.84	1.17	1.57	0.95	1.4	2.1	1.66	1.43	1.66	1.26	1.88	2.48	1.7	1.52
4833403I15Rik	NM_029008	0.42	0.86	0.36	1.45	0.69	0.62	0.83	0.24	1.76	1.26	0.35	0.75	0.5	0.6	0.47	2.45	0.97	1.22	0.33	0.56	1.4	0.48	0.85	0.51	0.31	0.22	1.16	0.48	2.19	0.76	0.55	0.3	0.3	0.31	1.45	1.63	0.59	2.46	0.93	1.63	1.03	2.06	0.93	2.9	1.19	1.61	1.1	2.89
4833411C07Rik	NR_102285	0	0	0	0	0	0	0	0	0	0	0	0	0	0.09	0	0	0.07	0	0	0	0	0	0	0	0	0	0	0	0	0	0	0	0	0	0	0.08	0	0.07	0	0	0	0.24	0	0	0	0	0	0
4833412C05Rik	NR_045954	0	0.07	0	0	0	0	0	0.14	0	0.22	0.06	0	0.08	0.1	0	0.37	0	0	0	0.09	0.08	0.3	0	0.18	0.12	0.17	0.13	0	0.11	0.21	0.1	0.09	0.23	0.21	0.14	0	0	0.42	0	0	0	0	0.04	0	0	0	0.27	0
4833415N18Rik	NR_126430	0	0.48	0.08	0	0.08	0	0	0.15	0	0.09	0.28	0	0	0	0.12	0	0	0	0	0.09	0	0.16	0	0.1	0	0.1	0.14	0.61	0	0	0	0.1	0.26	0	0	0	0.05	0.09	0	0.11	0	0	0.16	0	0.09	0	0.1	0
4833417C18Rik	NR_045187	0.56	0.49	0.84	1.22	0.48	0.23	0.39	0.89	0.39	1.31	0.83	0.68	0.68	0.43	0.36	0.4	0.59	0.53	1.26	0.7	1.16	0.84	2.99	0.45	0.49	0.86	1.49	0.54	0.94	1.22	1.02	0.37	0.89	1.03	0.66	1.4	1.19	0.61	0.39	0.78	0.94	0.98	0.9	0.96	0.5	0.82	0.52	0.65
4833418N02Rik	NR_015506	0.6	0.78	0.99	0.9	1.39	0.94	1.39	0.67	0.86	0.82	0.89	1.22	1.17	0.65	0.85	0.6	0.62	1.56	0.65	1.86	0.84	0.93	0.08	1.54	0.5	1.63	0.62	1.08	0.95	0.79	1.32	1.41	1.9	0.59	0.66	0.84	1.15	1.38	1.74	1.94	1.41	1.82	1.24	1.04	1.34	0.94	2.17	1.22
4833419F23Rik	NR_040328	2.44	1.88	2.35	3.2	3.42	3.17	3.1	3.31	3.19	1.92	3.31	2.08	3.15	2.97	1.52	1.69	2.81	2.08	2.21	5.95	4.86	5.32	6.14	5.14	3.92	4.6	4.8	4.28	5.76	5.73	4.17	4.03	4.98	4.16	5.23	4.46	4.31	3.22	3.21	2.01	3.97	2.52	3.14	1.86	4.56	3.73	2.96	4.14
4833420G17Rik	NM_001113550,NM_026127	16.58	13.03	13.57	12.52	19.54	19.07	18.53	17.58	18.71	17.4	15.14	19.17	21.13	19.52	14.58	15.92	14.84	18.42	19.37	17.8	17.67	14.54	17.41	17.96	12.79	19.96	23.78	16.62	18.96	19.19	18.24	16.79	17.49	17.18	16.54	16.32	19.79	17.55	23.99	22.05	17.36	20.95	18.87	22.79	18.74	25.06	21.34	24.3
4833422C13Rik	NR_015501,NR_028313,NR_028314	0.1	0.08	0.04	0.32	0.03	0.03	0	0.04	0	0.13	0.11	0.05	0.22	0.24	0	0.07	0.09	0.12	0.13	0.05	0.09	0.04	0.21	0.05	0.07	0.15	0	0	0	0.04	0.15	0	0.05	0.18	0	0	0.16	0.28	0.05	0.17	0	0.05	0.15	0	0	0.13	0	0.09
4833422M21Rik	NR_130160	0.07	0.1	0.19	0	0.18	0.13	0	0	0.07	0.06	0.1	0	0.3	0.24	0.09	0.29	0	0	0.06	0.13	0	0	0.28	0	0	0.07	0	0	0	0.06	0.08	0.07	0.06	0	0	0	0	0	0	0.23	0.15	0.25	0.07	0.43	0.34	0.7	0	0.12
4833423E24Rik	NM_001081664	0	0.12	0	0	0.04	0	0	0	0	0	0.08	0.06	0	0.13	0.14	0	0.05	0.09	0	0	0	0.14	0.23	0	0.15	0.05	0	0	0	0	0.07	0	0	0	0.26	0.05	0	0.05	0	0	0	0.17	0.31	0	0.05	0.14	0.12	0
4833427F10Rik	NR_045459	2.66	1.97	1.99	1.61	3.9	1.71	2.89	1.73	3.5	1.49	1.52	2.27	2.37	7.32	4.51	2.68	3.31	1.78	3.58	0.12	0.22	0.53	0	0.2	0.17	0.06	0	0.53	0.31	0.05	0.15	0.2	0	0	0.1	0.06	0.12	0.27	0.27	0	0	0	0.1	0	0	0	0.06	0
4833427G06Rik	NM_177702	2.19	1.12	0.79	1.57	0.5	0.81	1.15	2.83	0.68	1.26	2.53	0.8	3.72	1.48	0.79	1.76	1.84	1.14	4.84	0	0	0	0	0	0	0	0.55	0.21	0.15	0.3	0	0.53	0.22	0	0	0	0.26	0	0.13	0.14	0.41	0.32	0	0.19	0.25	0	0	0.45
4833428L15Rik	NR_040732	0.22	0	0.07	0	0.1	0.34	0.14	0.58	0.24	0.13	0.16	0.08	0.07	0.26	0	0.11	0.28	0.12	0.26	0	0	0	0	0	0	0	0.11	0	0	0	0	0.08	0	0	0	0	0	0	0	0	0	0	0	0.12	0	0	0	0.27
4833439L19Rik	NM_001252645,NM_001252646,NM_001252647,NM_001252648,NM_133797	91.78	85.31	87.97	69.18	93.63	83.75	100.98	92.98	108.32	76.89	73.34	94.19	86.9	117.41	107.91	91.38	88.2	90.57	81.44	68.28	69.4	69.21	57.46	77.08	47.28	64.32	112.8	67.62	64.23	69.74	76.09	79.74	69.98	74.79	71.99	59.93	72.55	77.74	263.61	233.43	221.68	224.88	232.96	270.14	221.7	232.68	227.62	251.33
4921501E09Rik	NM_001009544	0.02	0.02	0	0	0	0.06	0.04	0	0	0.08	0.05	0.12	0.73	0	0.06	0.07	0	0.04	0.04	0	0	0	0	0	0.06	0.05	0.03	0	0	0	0.01	0.05	0.06	0	0	0.07	0	0.04	0.02	0.05	0.08	0.12	0.01	0.11	0.05	0.03	0	0.17
4921504A21Rik	NR_102341,NR_102342	5.18	5.39	3.95	6.59	7.28	5.71	6.72	4.36	5.04	3.32	3.75	4.92	6.28	8.71	6.74	4.39	5.71	4.71	3.51	0.26	0.27	0.15	0	0.42	0.35	0.4	0.13	0.38	0.32	0.42	0.42	0.09	0.38	0.26	0.41	0.18	0.42	0.4	0.09	0.2	0.2	0.32	0.16	0.07	0.04	0.95	0.05	0.16
4921504E06Rik	NM_027600	0	0.03	0	0	0	0.06	0	0	0	0.15	0.03	0.1	1.49	0	0.06	0.07	0.09	0.08	0.12	0	0	0.08	0	0	0	0.05	0	0	0	0	0.03	0.14	0	0.06	0	0.14	0	0.09	0.1	0.05	0.05	0	0.02	0.14	0.05	0.18	0.05	0
4921506M07Rik	NM_001037743	0	0.05	0	0	0	0	0	0.05	0	0.05	0.18	0	1.05	0.07	0	0.09	0.23	0	0.11	0	0	0	0	0	0	0	0.09	0.05	0	0	0	0.2	0	0.08	0	0	0	0.12	0	0	0.14	0	0	0.1	0	0.24	0	0.11
4921507L20Rik	NR_045827	0.06	0.18	0.16	0	0.12	0.19	0.16	0.28	0.2	0.2	0.26	0.19	0.63	0.43	0.46	0	0.22	0.1	0	0	0	0.15	0	0.13	0	0.18	0.18	0	0.07	0.05	0.04	0.06	0.32	0.14	0	0.12	0.25	0.17	0.19	0.33	0.13	0.09	0.15	0.28	0.12	0.08	0.06	0.11
4921507P07Rik	NM_027564	1.58	0.98	0.78	1.34	0.93	1.04	1.44	1.69	1.37	1.16	1.41	2.03	12.24	2.04	1.11	1.73	2.44	1.92	2.48	1.01	1.09	0.96	0.55	1.24	1.9	1.21	3.34	1.23	0.9	1.19	0.95	1.89	0.98	1.09	0.79	1.24	2.52	1.94	6.53	7.67	5.83	4.24	6.4	7.99	4.25	7.84	5.84	8.09
4921508D12Rik	NR_045802	0	0	0	0	0	0	0	0	0	0	0	0	0	0	0	0	0	0	0	0	0	0	0	0	0	0	0	0	0	0	0	0	0.16	0	0	0	0	0	0	0	0	0	0	0	0	0	0	0.16
4921509C19Rik	NM_198655	0	0	0	0	0	0	0	0.11	0	0	0	0	0.38	0.07	0	0	0	0	0	0	0	0	0	0	0	0	0	0	0	0	0	0	0	0	0	0	0	0	0.07	0	0	0	0	0	0	0	0	0
4921509O07Rik	NR_045501	0	0	0	0	0	0	0.03	0	0	0	0	0	0	0.04	0	0	0	0	0	0.11	0.34	0.15	0.12	0.45	0	0.32	0.47	0.18	0.26	0.17	0.28	0.3	0.32	0.22	0.17	0.28	0.15	0.41	0.42	0.35	0.2	0.5	0.44	0.61	0.04	0.14	0.15	0.32
4921511C10Rik	NR_045502	0	0	0	0	0	0	0	0	0	0	0	0	0	0	0	0	0	0	0.06	0	0	0	0	0	0	0	0	0	0	0.05	0	0.07	0	0	0	0	0	0	0	0	0	0	0	0	0	0	0	0
4921511C20Rik	NR_003646	0	0	0.05	0	0	0	0	0	0	0	0	0.06	0.25	0	0	0	0	0	0.1	0	0	0	0	0	0	0	0	0	0	0	0	0	0	0	0	0	0	0	0	0	0.06	0	0	0	0	0	0	0
4921511H03Rik	NM_027603	0.09	0	0	0	0.3	0.06	0.17	0.07	0	0	0.07	0.1	3.25	0.43	0	0.26	0.17	0.15	0.72	0	0	0	0.38	0.1	0.13	0.09	0	0.08	0	0.07	0	0	0.08	0.22	0	0	0.19	0.09	0.19	0.2	0.2	0	0.32	0.42	0	0.35	0.1	0.16
4921511I17Rik	NR_045829	0	0	0.06	0	0	0	0	0	0	0	0	0	0.06	0	0	0	0	0	0	0	0	0	0	0.15	0	0	0	0	0.08	0.06	0.04	0	0.06	0	0	0	0	0	0	0	0	0	0	0	0.07	0	0	0
4921511M17Rik	NM_001201358_chrX:154109632_154120685	0	0	0	0	0	0.19	0	0.1	0	0.07	0	0	0	0.23	0	0	0.18	0.11	0	0	0	0	0	0	0	0.19	0.14	0	0.12	0	0	0.15	0	0	0	0	0	0	0.1	0	0	0	0.24	0	0	0	0.1	0.34
4921513I03Rik	NR_038000,NR_038003	0	0	0.05	0	0	0.27	0.05	0.05	0.06	0	0	0	0.66	0.48	0	0.08	0	0.1	0	0	0	0	0	0	0	0	0	0	0	0	0.07	0	0.18	0	0.09	0	0.06	0	0	0	0	0	0	0	0	0	0	0
4921515E04Rik	NR_045711	0.04	0.09	0.04	0	0.05	0.08	0.07	0.06	0.09	0	0.01	0.05	0.17	0	0	0.06	0	0.03	0.14	0.16	0.09	0.07	0	0.06	0	0.3	0.12	0	0	0.1	0.05	0.04	0	0	0	0.12	0.11	0.12	0.04	0.19	0.07	0.15	0.04	0.1	0	0.1	0.17	0.07
4921517D22Rik	NM_183290	0	0	0	0	0.02	0.02	0	0.11	0	0.07	0.08	0.06	0.38	0.03	0.23	0.16	0.08	0.05	0.08	0.32	0.13	0.12	0.63	0.24	0.12	0.11	0.25	0.1	0.07	0.09	0.1	0.15	0.18	0.25	0.22	0.26	0.43	0.3	0.06	0.03	0.06	0	0	0	0.03	0.19	0.06	0
4921524J17Rik	NM_025722,NR_033144	17.11	13.3	16.4	17.18	18.09	17.58	18.28	9.97	14.37	11.74	14.34	16.1	19.16	13.97	17.53	13.69	11.26	18.83	12.03	14.34	10.73	13.08	7.91	18.04	11.59	21.38	7.42	13.66	14.33	10.66	14.07	15.72	18.48	15.09	12.45	11.82	14.69	16.79	22.81	17.21	19.54	14.15	19.44	14.64	19.03	15.91	18.9	18.95
4921524L21Rik	NM_027598	0	0	0	0	0.04	0.08	0.12	0.05	0.14	0.11	0.05	0	1.82	0.45	0	0	0.12	0	0.17	0.06	0	0.11	0	0.07	0.09	0.06	0	0	0	0	0	0.2	0.17	0	0	0	0.26	0.06	0.07	0.07	0	0.03	0	0.1	0	0	0	0.11
4921525O09Rik	NR_045061	0	0.04	0	0	0	0	0.03	0	0	0	0.06	0	0.19	0.07	0	0	0	0.02	0.07	0.11	0.24	0.09	0.25	0.18	0.11	0.22	0.24	0.19	0.17	0.18	0.07	0.2	0.25	0.3	0.13	0.03	0.18	0.11	0.33	0.22	0.15	0.1	0.31	0.47	0.17	0.36	0.26	0.15
4921529L05Rik	NR_110484	0	0	0	0	0	0	0	0	0	0	0	0	0	0.07	0	0	0	0	0	0	0	0	0	0	0	0	0	0	0	0	0	0	0	0	0	0	0	0	0	0	0	0	0	0	0	0	0	0
4921530L21Rik	NM_025733	0	0	0.07	0	0	0.26	0.07	0.25	0	0.07	0.12	0.09	2.36	0.39	0	0	0.3	0.27	0.14	0	0	0.07	0	0.09	0.45	0	0.12	0	0.1	0.2	0.05	0.34	0.15	0.1	0	0.08	1.11	0.08	0	0.09	0.09	0	0.04	0	0	0.31	0.17	0.15
4921531C22Rik	NR_033782	3.56	4.18	4.55	3.5	4.33	3.36	3.77	4.4	4.37	2.65	3.39	3.73	4.41	5.78	4.76	2.75	3.59	3.73	3.99	2.73	2.39	1.23	2.42	1.43	1.34	1.83	3.19	2.18	2.69	1.46	2.19	1.98	1.9	1.7	1.43	2.49	1.42	1.93	2.52	2.72	2.77	2.63	3.12	2.41	1.36	2.12	2.6	1.85
4921531P14Rik	NR_045361	0	0.43	0	0	0.13	0	0	0	0	0.32	0	0.21	0.68	0	0	0.81	0	0	0.17	0	0	0	0	0	0	0	0	0	0	0	0	0	0	0	0	0	0	0	0	0	0	0	0	0	0	0	0	0.35
4921533I20Rik	NR_033607	0	0	0	0	0	0	0	0	0	0	0	0	0	0	0	0	0	0	0	0	0	0	0	0	0	0	0	0	0	0	0	0	0	0	0	0	0	0	0	0	0	0	0	0	0	0	0	0
4921534H16Rik	NR_110443	0	0	0	0	0	0	0	0	0	0	0	0	0.17	0	0	0	0	0	0.06	0.1	0	0.05	0	0.07	0	0.1	0	0.05	0.04	0.05	0.02	0	0.09	0.12	0.2	0	0	0	0	0	0.04	0.1	0	0.05	0	0.17	0	0
4921536K21Rik	NM_026150	2.06	1.46	1.29	0.67	2.05	1.97	1.63	1.57	1.29	1.15	1.38	1.51	4.28	1.94	1.39	1.24	1.01	1.76	2.2	3.35	3.24	2.48	1.75	4.72	1.78	3.56	2.96	3.29	3.72	2.6	3.1	4.14	3.34	3.05	3.46	2.84	3.85	3.8	7.18	7.75	5.26	4.77	6.34	8.73	5.66	5.58	7.03	7
4921539E11Rik	NM_001163494,NM_027612	0.04	0.03	0	0.58	0.1	0.08	0.04	0.18	0	0.31	0.14	0.25	2.49	0.09	0	0.22	0.36	0.22	0.14	0.04	0.17	0.16	0.05	0.04	0.11	0.04	0.11	0.23	0.09	0.06	0.05	0.31	0.07	0.09	0.06	0.27	0.29	0.29	0.08	0.21	0.38	0.4	0.14	0.3	0.08	0.2	0.29	0.14
4922502D21Rik	NM_199034	0.29	1.08	0.37	2.65	1.4	1.34	1.14	1.9	0.52	3.49	2.68	1.82	30.8	3.51	0.68	2.1	5.11	1.72	4.78	0.29	0.67	0.7	0.29	0.56	1.23	0.41	1.57	0.65	0.64	1.64	0.64	2.31	1.27	0.07	0.28	0.41	3.11	1.24	1.07	2.22	3.13	2.39	1.09	1.38	0.71	2.36	2.31	3.45
4922502H24Rik	NR_046187	0	0	0	0	0	0	0	0	0	0	0	0	0	0	0	0	0	0	0	0	0	0	0	0	0	0	0	0	0	0	0	0	0	0	0	0	0	0	0	0	0	0	0	0	0	0	0	0
4922502N22Rik	NR_045149	0	0	0	0	0	0	0	0	0	0	0	0	0	0	0	0	0	0	0	0	0	0	0	0	0	0.16	0	0	0	0	0	0	0	0	0	0	0	0	0	0	0	0.13	0	0	0	0	0	0
4930401C15Rik	NR_045349	0	0	0	0	0	0	0	0	0	0	0	0	0	0	0	0	0	0	0	0	0	0	0	0	0	0	0	0	0	0	0	0	0	0	0	0	0.12	0	0	0	0	0	0	0	0	0	0	0
4930401O10Rik	NR_045942	0	0	0	0	0.08	0	0	0	0	0	0.09	0	0	0	0	0	0	0	0	0	0	0	0	0	0	0	0	0	0	0	0	0	0	0	0	0	0	0	0	0	0	0	0	0	0	0	0	0
4930401O12Rik	NR_045957	0	0	0	0	0	0	0	0	0	0	0	0	0	0	0	0	0	0	0	0	0	0	0	0	0	0	0	0	0	0	0	0	0	0	0	0	0	0	0	0	0	0	0	0	0	0	0	0
4930402F06Rik	NM_001080709,NM_001272040	0	0	0	0	0	0	0.07	0	0	0	0	0	0	0	0	0	0.13	0	0	0	0	0	0	0	0.1	0.2	0	0.18	0.09	0	0	0	0.13	0	0	0	0	0.07	0	0	0	0	0	0	0	0	0	0
4930402F11Rik	NR_045940	0	0	0	0	0	0	0	0	0	0.16	0	0	0.08	0	0	0	0.09	0	0	0	0	0	0	0	0	0	0	0	0	0	0	0	0	0	0	0	0	0	0	0	0	0	0	0	0	0	0	0
4930402H24Rik	NM_029432	3.85	4.78	3.35	2.35	3.6	3.13	4.25	3.11	6.37	3.8	3.33	4.3	4.49	5.21	3.64	3.64	2.97	5.33	4.55	2.63	3.49	1.22	2.59	3.29	0.48	2.86	3.57	1.99	3.59	3.25	2.92	2.73	2.51	2.89	3.9	3	2.95	3.79	4.41	4.41	3.41	3.16	2.92	5.55	2.49	3.67	3.76	6.26
4930402K13Rik	NM_001270700	0	0	0	0	0	0.03	0	0.04	0	0	0	0	0.36	0.06	0	0	0	0	0	0.05	0	0	0	0	0	0	0	0	0	0	0	0	0	0	0	0	0	0	0.06	0	0.11	0	0.05	0.08	0	0	0	0
4930404A05Rik	NR_040495	0	0	0	0	0	0	0	0	0	0	0	0	0.36	0	0	0	0	0	0	0	0	0	0	0	0	0	0	0	0	0	0	0	0	0	0	0	0	0	0	0	0	0	0	0	0	0	0	0
4930404A10Rik	NM_029105	0	0.1	0	0	0	0	0.06	0	0.07	0	0.05	0.07	0.18	0.08	0	0	0	0	0	0	0	0	0	0	0	0	0	0	0	0	0	0	0	0	0	0	0.14	0	0	0	0.07	0	0	0	0.07	0.09	0.07	0
4930404H11Rik	NR_045941	0	0	0	0	0	0	0.12	0	0.27	0	0	0	0	0	0	0	0	0	0	0	0.11	0	0	0	0	0	0	0	0	0	0	0	0	0	0	0	0	0	0	0	0	0	0	0	0	0	0	0
4930404I05Rik	NR_028368	0.57	0.37	0.09	0	1.17	0.57	1.16	0.46	0.21	0.41	0.71	0.41	1.11	0.58	0.74	0.41	0.18	0.97	1.12	0.1	0.34	0.74	0.34	0.51	0	2.54	0.29	0.65	0.47	0.32	0.99	0.31	1.13	0.12	0.6	0.48	0.81	0.37	1.23	1.38	0.43	0.25	0.84	1.36	0.78	2.23	0.41	1.06
4930404N11Rik	NM_001014836	6.15	7.67	6.7	3.23	9.68	4.57	4.67	7.24	5.94	6	5.59	4.78	5.18	9.85	7.11	4.75	9.17	5.62	3.71	1.23	0.96	0.83	1.64	1.62	1.37	0.71	1.04	0.82	0.84	0.57	0.67	2.99	0.88	0.5	0.22	1.23	1.46	1.75	2.95	3.65	1.71	1.51	2.9	1.09	1.82	1.78	2.5	1.53
4930405A10Rik	NR_046307	0	0	0	0	0	0	0	0	0	0	0	0	0	0	0	0	0	0	0	0	0	0	0	0	0	0	0	0	0	0	0	0	0	0	0	0	0	0	0	0	0	0	0	0	0.1	0	0	0
4930405A21Rik	NR_040505	1.03	0.57	1.46	1.01	0.38	0.49	0.35	0.52	0.62	0.88	0.49	0.91	1.09	0.68	0.73	0.4	0.35	0.56	0.51	0.47	0.99	0.89	0.33	0.7	0.4	0.48	0	0.88	0.46	0.39	0.23	0.5	0.51	0.11	0.89	0.09	0.7	0.82	0.1	0.1	0.11	0	0.19	0.3	0.1	0.37	0.5	0
4930405D11Rik	NR_045956	0	0	0	0	0	0	0	0.12	0	0	0	0	0.27	0	0	0	0.42	0.25	0.27	0	0	0	0	0	0	0.15	0	0	0	0	0	0	0	0	0	0	0.47	0.15	0	0	0	0	0.08	0	0	0	0	0
4930405J17Rik	NR_045350	0.15	0.12	0	0	0.31	0.31	0	0	0	0.13	0.11	0.17	0.28	0.37	0	0	0	0.13	0.28	0	0	0.13	0	0.33	0.22	0	0	0	0	0.13	0.09	0	0.14	0	0	0	0	0	0	0	0	0.16	0	0	0	0	0	0
4930405L22Rik	NR_110478	0	0	0	0	0	0	0	0	0	0	0	0	0	0	0	0	0	0	0	0	0	0	0	0	0	0	0	0	0	0	0	0	0	0	0	0	0	0	0	0	0	0	0	0	0	0	0	0
4930406D18Rik	NR_040543	0.28	0.21	0	0	0.09	0.09	0	0.22	0.15	0.83	0.31	0	3.35	0.17	0	0.4	0.13	0.47	0.75	0	0	0	0.87	0.15	0.2	0	0.42	0	0	0	0	0	0.76	0	0.44	0	0.59	0	0.15	0.15	0	0	0	0.22	0.42	0	0.15	0
4930407I10Rik	NM_001166475	0.02	0.1	0.02	0	0.03	0.12	0.16	0.11	0.08	0.28	0.17	0.12	1.73	0.39	0.02	0.28	0.4	0.1	0.09	0.04	0.02	0.03	0.01	0.04	0.16	0.04	0.2	0.03	0.02	0.03	0.02	0.41	0.16	0	0	0.02	0.49	0.09	0.04	0.15	0.21	0.07	0.01	0	0.14	0	0.02	0.07
4930412B13Rik	NR_040631	0	0	0	0	0	0	0	0	0	0	0	0	0	0	0	0	0	0	0	0	0	0	0	0	0	0	0	0	0	0	0	0	0	0	0	0	0	0	0	0	0	0	0	0	0	0	0	0
4930412C18Rik	NR_030693	0.11	0.19	0.04	0	0	0.01	0.06	0.13	0.07	0	0.05	0.02	0.06	0	0.09	0.1	0	0.02	0.28	0.11	0.22	0.17	0.14	0.43	0.09	0.05	0.6	0.21	0.3	0.15	0.32	0.17	0.1	0.08	0.28	0.16	0.1	0.26	1.39	1.92	1.18	1.19	1.27	1.77	0.94	1.21	1.16	1.54
4930412D23Rik	NM_001281537	0	0	0	0	0	0	0	0	0	0	0	0	0	0	0	0	0	0.2	0.21	0	0	0	0	0	0	0	0	0	0	0	0	0.12	0	0	0	0	0	0.11	0	0.26	0.13	0	0	0	0	0.75	0	0.21
4930412O13Rik	NR_024257	1.84	2.7	2.31	4.61	6.14	3.03	4.13	6.42	3.04	3.58	4.46	3.96	4.59	9.71	3.38	3.43	3.44	3.72	5.65	7.76	10.26	6.19	11.59	15.14	8.08	27.71	23.94	6.81	9.01	11.58	15.61	16.32	22.61	9.72	10.75	11.5	20.91	14.07	7.29	7.84	4.95	7.89	5.64	6.31	5.78	8.66	5.26	5.53
4930413E15Rik	NR_040694	0	0	0	0	0	0.05	0	0	0	0.12	0	0	0.13	0	0	0	0	0	0	0	0	0	0	0	0	0	0	0	0	0	0	0	0	0	0	0	0.23	0	0	0	0	0	0	0	0	0	0	0.13
4930413F20Rik	NR_045883	0.85	1.31	1.63	1.84	1.74	0.78	1.03	1.35	0.85	0.66	1.82	1.28	1.22	0.82	1.03	1.11	0.8	0.8	0.54	1.47	1.05	1.32	1.8	2.63	0.12	0.86	1.28	0.99	0.52	0.91	0.68	1.36	0.71	1.04	1.07	0.78	1.09	0.98	1.86	1.72	1.24	1.14	1.31	1.77	0.35	1	0.74	1.42
4930413G21Rik	NR_045614	2.74	3.07	4.2	4.09	5.14	1.76	2.56	4.53	2.39	3.13	4.41	3.02	4.55	3.62	3.31	2.83	6.04	4.64	4.65	4.59	3.68	3.88	5.44	7.5	1.47	2.32	3.12	4.78	2.49	2.77	3.6	3.64	2.56	5.69	2.68	3.93	2.3	2.97	6.35	4.68	3.74	6.23	6.92	2.79	4.12	4.35	8.54	1.57
4930413M19Rik	NR_045759	0	0	0	0	0	0	0	0	0	0	0	0	0	0	0	0	0	0	0	0	0	0	0	0	0	0	0	0	0	0	0	0	0	0	0	0	0	0	0	0	0	0	0	0	0	0	0	0
4930414L22Rik	NR_046011	2.78	2.93	3.05	3.56	2.29	2.87	2.93	3.95	2.29	3.09	2.49	2.36	2.33	4.05	1.76	2.78	3.53	2.89	4.22	2.84	2.14	1.91	5.03	2.76	2.05	1.89	2.87	3.09	2.3	2.59	2.36	1.97	2.7	2.17	1.98	2.56	2.22	1.4	3.23	3.5	2.52	2.05	2.36	2.74	2.02	2.46	3.08	2.32
4930414N06Rik	NR_040294	0	0	0	0	0.55	0	0.75	0.13	0	0	0.12	0.69	2.02	0.2	0	0	0.47	0.14	0.14	0.16	0	0	0	0.34	0.45	0.17	0.24	0.28	0.6	0.13	0.1	0.17	0.3	0	0	0	0.86	0.16	0.53	0.72	0.37	0.51	0.09	0	0	0	0	0.18
4930415F15Rik	NM_028669	0.5	0.58	0.7	1.08	0.6	0.25	0.48	0.6	0.42	0.43	0.28	0.55	2.6	0.46	1.63	0	0.12	0.64	0.91	0.25	0.33	0.33	0	0.68	0.72	0.65	0.38	0.32	0.62	0.42	0.62	0.14	0.93	0.31	0.2	0	0.4	0.98	0.14	0	0.14	0.4	0.71	0.2	0.64	0.65	0	0.47
4930415L06Rik	NM_001033880	0	0	0	0	0	0	0	0	0	0	0	0	0.03	0	0	0	0	0	0.03	0	0	0	0	0	0	0	0	0	0	0.03	0	0	0	0	0	0	0	0.03	0.04	0	0	0	0.02	0	0	0.09	0	0
4930415O20Rik	NM_001201322	0.51	0.92	0.95	1.1	1.18	1.03	0.49	1.79	0.38	0.29	1.14	0.19	4.64	1.26	1.33	1.48	0.65	0.44	2.16	1.36	1.35	0.74	0.84	0.92	1.48	1.26	0.78	1.46	1.27	0.71	0.63	2.26	1.27	1.25	1.37	1.02	0.91	0.34	0.55	0.57	0.78	0	0.53	0	0.53	0.22	0.55	1.59
4930417O13Rik	NR_015527	0	0	0	0	0	0	0	0	0	0	0	0	0	0	0	0	0	0	0.08	0	0	0	0	0	0	0	0	0	0	0	0	0	0	0.31	0	0	0	0	0	0	0	0	0	0	0	0	0	0
4930417O22Rik	NR_045806	0	0	0	0	0	0	0	0	0	0	0	0	0	0	0	0	0	0	0	0	0	0	0	0	0	0	0	0	0	0	0	0	0	0	0	0	0	0	0	0.09	0	0	0	0	0.04	0	0	0.14
4930419G24Rik	NR_040595	0	0	0	0	0	0	0	0	0	0	0	0	0	0	0	0	0	0	0	0.09	0	0	0	0	0	0	0	0	0	0	0	0	0	0	0	0	0	0	0	0	0	0	0	0	0.09	0	0	0
4930423M02Rik	NR_038183	0	0	0	0	0	0	0	0	0	0	0.06	0	0.68	0	0	0	0	0	0.07	0	0.07	0	0	0	0	0	0	0	0	0	0	0	0	0	0	0	0	0	0	0	0.09	0	0	0	0	0.1	0	0
4930425K10Rik	NR_038182	0	0	0	0	0	0	0	0.1	0	0	0	0	0.23	0	0	0	0	0.11	0	0	0	0	0	0	0	0	0	0	0	0.11	0	0.14	0	0	0	0	0	0	0	0	0	0	0	0	0	0	0	0
4930425L21Rik	NR_126088	0	0	0	0	0	0	0	0	0	0	0	0	0	0	0	0	0	0	0	0	0	0	0	0	0	0	0	0	0	0	0	0	0	0	0	0	0	0	0	0	0	0	0	0	0	0	0	0
4930425O10Rik	NR_040545	0	0	0	0	0	0	0	0	0	0	0	0	0	0	0	0	0	0	0	0	0	0	0	0	0	0	0	0	0.08	0	0	0	0	0	0	0	0	0	0	0.14	0	0	0	0	0	0	0	0
4930426D05Rik	NM_001271580	6.05	3.71	3.78	5.35	4.34	6.01	4.17	8.11	6.69	6.1	3.61	5.01	6.94	2.28	2.12	4.38	4.12	8.43	13.84	14.89	18.24	13.9	21.64	22.17	14	34.31	36.33	14.04	15.93	23.65	23.54	16.96	29.91	16.23	22.06	18.36	27.69	18.78	22.77	30.41	19.56	27.66	22.09	24.58	22.38	33.59	22.03	24.39
4930426L09Rik	NR_024323	0.06	0	0	0	0.08	0.12	0.29	0.15	0.07	0.16	0.05	0	0.05	0.07	0.08	0.27	0	0.05	0.17	0.19	0.27	0.11	0	0.13	0	0.31	0.18	0.42	0.23	0.36	0	0	0.17	0.15	0	0	0.07	0.12	0	0.14	0.14	0	0.03	0	0	0	0.07	0
4930427A07Rik	NM_134041	2.77	2.99	2.72	3.19	3.87	3.4	4.28	3.38	3.96	3.02	2.78	4.46	4.06	5.03	4.07	3.89	3.28	3.23	2.84	1.43	1.72	0.55	2.72	1.49	1.49	1.37	1.39	1.18	1.84	1.29	1.37	1.68	1.53	0.99	2.27	1.53	1.34	1.69	0.98	1.68	0.8	1.1	1.36	1.14	1.09	1.16	1.2	1.04
4930428D18Rik	NM_001033799	0	0	0	0	0	0	0	0	0.09	0	0	0.09	0.68	0	0	0	0.32	0	0.08	0	0	0	0	0	0	0	0	0	0	0	0	0.09	0	0	0	0	0	0	0	0	0	0	0.09	0	0	0	0	0
4930428E07Rik	NR_045943	0.1	0	0	0	0	0	0	0	0	0.09	0	0	0	0	0	0	0	0	0	0	0	0	0	0	0	0	0	0	0	0	0	0	0	0	0	0	0	0	0	0	0	0	0	0	0	0	0	0.19
4930428G15Rik	NR_040730	0	0	0	0	0	0	0	0	0	0	0	0	0	0	0	0	0	0	0	0.12	0.41	0	0	0.25	0	0.12	0	0	0	0.19	0.29	0	0.32	0.14	0	0	0	0.11	0	0.26	0.13	0.25	0	0	0	0	0.25	0
4930428O21Rik	NR_045871	0	0	0	0	0	0	0	0	0	0	0	0.06	0	0.06	0	0	0	0	0	0	0	0	0	0	0	0	0	0	0	0	0	0	0	0	0	0	0	0	0	0	0	0	0.03	0	0	0	0	0
4930429B21Rik	NR_027966	0.09	0.11	0.09	0.11	0	0	0.13	0.07	0.05	0.24	0.03	0.05	0.17	0.06	0	0.13	0.04	0.08	0.13	0.33	0.45	0.25	0.1	0.35	0.07	0.19	0.35	0.24	0.23	0.62	0.11	0.3	0.21	0.46	0.15	0.38	0.35	0.45	0.15	0.21	0.21	0.05	0.07	0.15	0.24	0.25	0.2	0.09
4930429D17Rik	NR_040699	1.01	0.78	0.72	1.34	0.58	0.22	0.31	0.58	0.25	0.53	0.5	0.54	0.6	0.54	0.87	0.16	0.42	0.43	0.61	0	0	0.05	0	0.06	0	0	0	0.1	0	0	0	0	0.05	0	0	0	0	0	0.06	0.13	0	0	0.03	0.09	0	0	0.06	0
4930429F11Rik	NR_033463	0	0	0	0	0	0	0	0	0	0	0	0.06	0.05	0	0	0	0	0	0	0	0	0	0	0	0	0	0	0	0	0	0	0	0	0	0	0	0	0	0	0	0.06	0	0	0	0	0	0	0
4930429F24Rik	NR_040734	0.72	0.32	0.33	0.39	0.41	0.24	0.28	0.62	0.2	0.46	0.18	0.32	0.59	0.65	0.08	0.26	0.23	0.3	0.92	0.84	0.58	0.88	0.59	0.52	0.08	0.49	1.44	1.09	0.59	0.4	0.48	0.58	0.55	0.66	0.76	0.24	0.32	0.41	0.39	0.27	0.47	0.28	0.37	0.57	0.37	0.24	0.64	1
4930430A15Rik	NM_026248	0.05	0.08	0.09	1.92	0.1	0.13	0.37	0.04	0.11	0.3	0.15	0.05	3.92	0.42	0	0.43	0.33	0.17	0.27	0	0	0	0	0	0	0	0	0	0	0	0.03	0.26	0.13	0	0.08	0	0.16	0	0.05	0.17	0.22	0.29	0.08	0.16	0.1	0.06	0.05	0.37
4930430F08Rik	NM_175128	6	4.73	5.4	5.4	5.9	4.94	6.19	4.7	5.96	3.63	5.41	5.17	5.27	5.44	6.34	4.65	5.73	5.32	5.15	4.51	3.75	3.18	1.91	4.55	2.38	5.7	5.13	3.53	3.02	3.29	4.27	4.02	3.94	4.21	3.92	3.68	3.85	4.96	2.62	3.12	2.71	2.28	3.92	3.17	2.66	3	2.83	3.53
4930430F21Rik	NR_045186	0	0	0	0	0	0.08	0	0	0	0	0	0	0	0	0	0	0	0	0.11	0	0	0	0	0	0	0	0.18	0	0	0	0	0	0	0	0	0	0.12	0	0	0	0	0	0	0	0	0	0	0
4930430J02Rik	NR_040729	0	0	0	0	0	0	0	0	0	0.19	0	0	0	0	0	0	0	0	0	0	0	0	0	0	0	0	0	0	0	0	0	0	0.21	0	0	0	0	0	0	0	0	0	0	0	0	0	0	0
4930431F12Rik	NR_073013	0.28	0.22	0.11	0	0.22	0.16	0.3	0.19	0.31	0.24	0.15	0.3	0.45	0.1	0.16	0.35	0.11	0.34	0.25	0.68	0.39	0.52	0.25	0.87	0.67	0.4	0.42	0.28	0.05	0.6	0.42	0.77	0.65	0.49	0.5	0.36	0.38	0.38	0.69	0.49	0.27	0.27	0.54	0.13	0.24	0.63	0.51	0.44
4930431P03Rik	NR_045059	0	0.03	0	0	0	0.03	0	0.06	0.04	0.03	0.03	0	0.11	0.05	0	0.06	0	0.03	0.04	0	0	0	0	0	0	0	0.06	0	0	0	0	0	0	0	0.06	0.12	0	0.04	0	0	0.04	0	0	0	0	0	0.04	0
4930432J09Rik	NR_045953	0.03	0.02	0	0	0	0.04	0.11	0.05	0.03	0	0.04	0.06	0.23	0	0	0	0	0.05	0.16	0	0	0	0	0	0	0	0.04	0	0.11	0	0	0	0	0	0.09	0	0	0	0	0	0	0	0.03	0	0	0	0	0
4930432K21Rik	NM_001163752,NM_029045	0.87	0.45	0.52	0.57	0.84	0.95	1.57	0.69	1.09	1	0.9	0.7	3.26	0.77	0.49	0.76	0.72	0.88	1.06	3.05	2.75	4.33	2.42	4.97	3.18	3.57	7.43	4.15	2.41	3.28	5.47	4.52	4.33	3.21	3.98	2.87	3.23	4.66	5.46	4.84	4.14	5.35	5.16	6.19	4.84	5.76	5.94	5.65
4930432M17Rik	NM_001033814	0	0	0	0	0	0	0	0	0	0	0	0	0	0	0	0	0	0.14	0	0	0	0	0.23	0	0	0	0	0	0	0	0	0	0	0	0	0	0	0	0	0	0	0	0	0.13	0	0	0	0
4930433B08Rik	NR_040544	0	0	0	0	0.1	0	0	0	0	0	0	0	0	0	0	0	0	0	0	0	0	0	0	0	0	0	0	0	0	0	0	0	0	0	0	0	0	0	0	0	0	0	0	0	0	0	0	0
4930433I11Rik	NM_207248	0	0.03	0.08	0.29	0.06	0.12	0.12	0.07	0	0	0.03	0	0.84	0	0	0	0.08	0	0.12	0	0	0	0	0	0.06	0	0.07	0	0	0	0	0	0	0	0.07	0	0	0	0.1	0.15	0	0.05	0.02	0.14	0	0.23	0.1	0
4930433N12Rik	NR_027988	0.13	0.46	0.24	0	0.18	0.26	0.06	0.26	0.07	0.17	0.2	0	1.18	0.48	0.17	0.19	0	0.17	0.42	0	0.12	0	0.28	0	0	0	0	0.06	0	0	0.04	0	0.06	0	0	0	0.14	0	0	0	0.15	0	0	0	0	0.09	0	0.25
4930434J06Rik	NR_046274	0	0	0	0	0	0	0	0	0	0	0	0	0.05	0	0	0	0.06	0	0	0	0	0	0	0	0	0	0	0	0	0	0	0	0	0	0	0	0	0	0	0	0	0	0	0.09	0	0	0.06	0
4930435E12Rik	NM_029042	0	0.21	0.12	0	0.05	0.18	0.19	0.32	0.07	0.46	0.15	0.43	1.97	0.16	0.09	0.1	0.13	0.11	0.36	0	0	0.23	0.14	0.14	0.28	0	0.2	0.06	0.08	0	0.04	0.22	0.06	0	0.21	0.13	0.36	0.06	0.07	0	0.23	0	0	0.11	0	0.09	0.07	0.25
4930438E09Rik	NR_045961	0	0	0	0	0	0	0	0	0	0	0	0.13	0.22	0	0	0	0	0	0.11	0	0	0	0	0	0	0	0	0	0	0	0	0	0	0	0	0	0	0	0	0	0	0	0	0	0	0	0	0
4930440C22Rik	NR_040473	0	0	0	0	0	0.04	0	0	0	0	0	0	0.26	0	0	0.08	0	0	0	0	0	0	0	0	0	0	0	0	0	0	0	0	0	0	0	0	0	0	0	0	0.07	0	0	0	0	0	0.12	0
4930440I19Rik	NR_108098	0	0	0.08	0	0	0	0.08	0	0	0	0	0	0	0	0	0	0	0	0	0	0	0	0	0	0	0	0	0	0	0	0	0.1	0	0	0	0	0	0	0	0	0	0	0	0	0	0	0	0
4930441J16Rik	NR_040501	0	0	0	0	0	0.13	0	0	0	0	0	0	0.34	0	0	0	0	0.16	0.34	0	0	0	0	0	0	0.2	0	0	0	0	0	0.63	0	0	0	0	0	0	0	0	0	0	0	0	0	0	0	0.35
4930442J19Rik	NR_040747	0	0.05	0	0.81	0.26	0.04	0.06	0.3	0	0.27	0.09	0.2	1.56	0.23	0.16	0.36	0.18	0.05	0.23	0	0	0	0	0	0.26	0	0.09	0	0	0	0	0.27	0	0	0	0	0.07	0.06	0	0.14	0	0	0	0.1	0	0.24	0	0.12
4930442L01Rik	NR_015596	5.02	6.06	3.61	3.63	7.28	4.56	5.91	6.04	5.32	2.79	4.06	5.35	8.13	10.72	7.51	3.69	4.62	4.84	5.45	0.4	0.54	0.23	0.06	0.71	0.19	0.67	0.07	0.46	0.11	0.48	0.3	0.89	0.32	0.27	0.42	0.09	1.27	0.3	0.14	0.3	0.49	0.28	0.28	0	0	0.17	0.85	0.49
4930443O20Rik	NR_040504	0.25	0.05	0.17	0	0.09	0.08	0.06	0.2	0.07	0.22	0	0.07	0.4	0.23	0.16	0.18	0.66	0.16	0.34	0	0	0.05	0	0.27	0	0.19	0	0	0.08	0.05	0.04	0.14	0	0.08	0	0	0.07	0.06	0.34	0.14	0	0.1	0.1	0.2	0	0.08	0.07	0.23
4930444F02Rik	NR_038034,NR_038035,NR_102728	0	0	0	0	0.11	0.07	0	0.08	0	0	0.04	0.04	0.61	0.13	0	0.07	0	0.09	0.2	0	0	0	0.28	0.09	0.07	0	0	0	0	0	0.05	0.11	0	0.04	0.17	0	0.15	0.03	0	0	0.06	0.29	0	0.17	0.05	0.28	0.04	0.06
4930444G20Rik	NM_053264	0	0.28	0.26	0	0.63	0.35	0.55	0.28	0.11	0.18	0.23	0.59	1.05	0.48	0	0.17	0.05	0.31	0.39	0	0.23	0.13	0	0.54	0	0.77	0.36	0.1	0.29	0.23	0.22	0.59	0.9	0.27	0.16	0.2	0.06	0.35	0.08	0.14	0.17	0.38	0.15	0.35	0.19	0.07	0.27	0.76
4930444M15Rik	NR_045660	0	0.04	0	0	0	0	0.05	0.04	0	0	0.08	0	0.69	0	0	0	0	0.05	0	0	0	0.05	0	0.12	0	0	0	0	0	0	0	0.06	0.05	0	0	0	0.06	0	0	0	0.06	0.32	0.03	0	0	0.22	0	0
4930444P10Rik	NM_001243238	0.26	0.1	0.24	0	0.18	0.18	0.25	0.21	0	1.02	0.1	0.29	3.22	0.16	0.34	0.19	0.37	0.11	0.48	0	0	0	0	0	0.38	0	0	0	0	0	0.24	0.14	0	0	0	0	0.56	0.39	0.57	0.74	0	0	0.48	0.21	0	0.34	0.43	0.49
4930445N18Rik	NR_125720	0.53	0.08	0.19	0.23	0.07	0	0.4	0.25	0	0	0	0.11	0.19	0.13	0.14	0.15	0	0	0.48	0.21	0.37	0.09	0.6	0.23	0.3	0.22	0.32	0.09	0	0.18	0.06	0.11	0.1	0.26	0	0.32	0.45	0	0.11	0.12	0.36	0	0.22	0.17	0.22	1.1	0	0
4930447A16Rik	NM_029113	0	0	0	0	0	0	0	0	0	0	0	0	0.15	0	0	0	0	0	0	0	0	0	0	0	0	0	0	0	0	0	0	0	0	0	0	0	0	0	0	0	0	0	0	0	0	0	0	0
4930447C04Rik	NM_029444	0	0	0.04	0	0.03	0	0	0	0	0	0.04	0	1.14	0	0	0	0	0	0	0	0	0.08	0	0.05	0	0	0	0.08	0	0	0.03	0.05	0	0	0	0	0	0	0.05	0	0	0	0.02	0.07	0	0	0	0
4930447F24Rik	NR_126077,NR_126078	1.01	0.76	0.68	0.18	0.8	1.08	0.84	1.18	0.27	0.7	0.7	0.29	1.03	0.69	0.64	0.24	0.23	0.76	0.74	0.08	0	0	0	0.09	0	0.28	0.12	0.07	0	0.17	0.2	0	0.37	0	0.22	0	0	0.07	0.35	0.64	0	0.47	0.3	0.13	0.17	0.32	0.7	0.15
4930447J18Rik	NR_045959	0	0	0	0	0	0	0	0	0	0	0	0	0.31	0	0	0	0	0	0	0	0	0	0	0	0	0	0	0	0	0	0	0	0	0	0	0	0	0	0	0	0	0	0.18	0	0	0	0	0
4930447K03Rik	NR_046184	0	0	0	0.39	0.12	0.18	0.17	0	0.1	0.39	0.27	0.68	0.8	0	0	0.39	0	0.38	0.08	0.18	0	0	0	0.29	0.13	0.18	0	0.08	0	0	0.17	0.58	0.25	0.22	0	0	0.1	0.17	0.1	0.1	0	0	0.19	0.29	0	0.23	0	0
4930447M23Rik	NR_126563	0.04	0	0	0	0	0.03	0	0.03	0.04	0.07	0	0	0.07	0.05	0	0.06	0.07	0	0.03	0.04	0	0.07	0	0	0.05	0	0.06	0.2	0	0	0	0	0	0	0	0	0	0.07	0.04	0	0.04	0	0.02	0	0	0	0	0.07
4930447N08Rik	NR_045168	0	0	0	0	0.05	0	0	0	0	0	0	0	0	0	0	0.12	0	0	0	0	0.07	0	0	0	0.23	0	0	0	0	0	0	0	0	0	0	0	0	0	0	0.18	0	0	0	0	0	0	0	0
4930448C13Rik	NR_045960	0	0	0	0	0	0	0	0	0.13	0	0.09	0	0.42	0	0	0	0.33	0	0.11	0	0	0.2	0	0	0	0	0	0.1	0	0	0	0	0	0.43	0	0	0	0	0	0	0	0	0	0	0	0	0	0
4930448F12Rik	NR_046032	0	0	0	0	0	0	0	0	0	0	0	0	0	0	0	0	0	0	0	0	0	0	0	0	0	0	0	0	0	0	0	0	0	0	0.17	0	0	0	0	0	0	0	0	0	0	0	0	0
4930448H16Rik	NR_040700	0	0	0	0	0	0	0	0	0	0	0	0	0.14	0	0	0	0	0	0	0	0	0	0	0	0	0	0	0	0	0	0	0	0	0	0	0	0.17	0	0	0	0	0	0	0	0	0	0	0
4930448I06Rik	NR_040475	0	0	0	1.45	0	0	0	0	0	0.15	0	0	0	0	0	0.73	0	0	0	0	0	0	0	0	0	0	0	0	0	0	0	0	0	0	0	0	0	0	0	0	0	0	0	0	0	0	0	0
4930448I18Rik	NR_040696	0	0	0	0	0	0	0	0	0	0	0	0	0	0	0	0	0	0	0	0	0	0	0	0	0	0	0	0	0	0	0	0	0	0	0	0	0	0	0	0	0.15	0	0	0	0	0	0	0
4930448K20Rik	NR_004448	0	0	0	0	0	0	0.12	0	0	0.16	0	0	0.74	0	0	0	0	0	0	0	0	0	0	0	0.09	0	0.1	0	0	0	0	0.07	0	0	0	0	0.27	0	0	0	0.07	0	0	0	0.07	0	0	0
4930449E01Rik	NR_045921	0	0	0	0	0	0	0	0	0	0	0	0	0.29	0.2	0	0	0	0.28	0	0	0	0	0	0	0	0	0	0	0	0	0	0	0	0	0	0	0	0	0.17	0	0	0	0	0	0	0	0	0
4930449E18Rik	NR_045319	0.26	0.2	0	1.1	0.36	0.35	0	0	0.58	0.22	0.77	0	0	0	0	0.37	0	0	0.23	0	0	0.23	0	0.28	0	0	0.4	0	0.64	0	0.16	0	0	0	0	0	0.55	0.26	0.56	0.85	0.3	0	0.4	0	0	0	0	0
4930449I24Rik	NM_026136	0	0	0	0	0	0.08	0	0	0	0	0	0	1.64	0	0	0	0	0.2	0	0	0	0	0	0	0.22	0	0	0	0	0.07	0	0	0	0	0	0	0	0	0	0	0	0	0	0	0	0	0	0
4930451G09Rik	NR_073370	1.8	2.13	1.78	2.48	2.24	2.69	2.42	2.98	2.84	3.56	2.47	2.55	10.19	2.89	2.06	2.61	2.64	2.94	3.26	2.78	3.11	1.69	2.63	2.52	1.95	2.81	4.29	2.5	3.43	2.64	2.33	2.94	3.2	2.54	3.45	2.78	3.66	2.23	4.12	4.1	4.43	3.9	3.41	4.5	3.1	4.95	4.22	4.46
4930451I11Rik	NM_183131	0	0	0	0	0	0.14	0	0.17	0	0	0.31	0.23	2.08	0.26	0	0	0.2	0	0.19	0	0	0	0.73	0	0.3	0	0	0	0	0.17	0	0.23	0	0	0	0	0.44	0.62	0	0.69	0.24	0	0.53	0	0	0.54	0.22	0.39
4930452A19Rik	NR_045433	0	0	0	0	0	0	0	0	0	0	0	0	0.15	0	0	0	0	0	0	0	0	0	0	0	0	0	0	0	0	0	0	0	0	0	0	0	0	0	0	0	0	0	0	0	0	0	0	0
4930452B06Rik	NM_028934	2.05	1.64	1.89	1.35	1.48	1.58	1.52	1.2	1.7	1.29	0.99	1.05	1.22	1.29	2.04	1.6	1.42	1.37	1.15	2.73	2.25	2.47	2.33	2.63	1.56	2.1	3.45	1.67	2.85	2.44	2.62	3.06	3.02	2.7	2.37	2.73	2.93	3.36	5.84	4.22	3.9	4.41	4.48	5.1	3.82	4.71	4.38	4.9
4930452G13Rik	NR_045060	0.09	0	0.08	0	0	0	0.32	0.07	0	0.07	0.25	0.09	2.84	0.1	0	0.12	0.08	0.15	0.08	0	0.08	0	0	0	0	0.09	0.26	0.29	0	0.14	0	0	0	0	0	0	0.09	0	0	0.1	0.1	0	0	0.14	0.09	0.11	0	0
4930452N14Rik	NR_040629	0	0	0	0	0	0	0	0	0	0	0	0	0	0	0	0	0	0	0	0	0.14	0	0	0	0	0	0	0	0	0	0	0	0	0	0	0	0	0	0	0	0	0	0	0	0	0	0	0
4930453H23Rik	NM_001252013	0	0	0	0	0.04	0.07	0	0	0	0.05	0	0.06	0.52	0.13	0	0.08	0	0.04	0	0.05	0.05	0	0	0	0	0	0.24	0.05	0	0.04	0.03	0.11	0.1	0	0	0	0.11	0	0.06	0	0	0	0.03	0	0	0.07	0	0.1
4930453L07Rik	NR_073360	0	0	0	0	0	0.04	0	0	0	0	0.05	0	0.4	0	0	0.28	0	0	0	0	0	0	0	0	0	0	0.1	0	0	0	0	0.14	0	0	0	0	0.07	0	0.07	0.07	0.14	0	0	0	0	0	0	0
4930453N24Rik	NM_026273	24.76	26.91	22.44	23.53	24.79	19.48	22.56	24.24	24.98	25.28	22.62	25.11	47.03	32.52	23.65	28.46	22.18	22.34	31.09	30.97	31.82	31.61	24.52	29.76	27.69	28.06	45.58	33.39	30.26	30.62	29.5	28.86	26.35	31.8	32.57	27.86	31.76	29.46	28.54	33.06	30.44	25.49	29.65	34.39	30.83	27.44	27.04	29.65
4930455B14Rik	NR_045968	0	0.13	0.08	0	0	0.17	0.08	0.27	0	0.22	0.13	0.09	1.96	0.2	0	0.12	0.48	0	0.23	0	0.07	0	0	0	0.24	0	0	0	0	0	0	0	0.08	0	0	0	0	0.08	0	0	0.1	0	0.18	0	0	0.44	0	0.16
4930455C13Rik	NR_045352	0.1	0	0.19	0	0.49	0.26	0.1	0.25	0.12	0.18	0.15	0.22	0.18	0.24	0.27	1.07	0.2	0.26	0	0	0.28	0	0	0.11	0	0.1	0.29	0.09	0	0.26	0.06	0.22	0	0	0	0	0.48	0	0	0	0.11	0.59	0.11	0	0.51	0.27	0	0
4930455D15Rik	NR_045381	0	0	0	0	0	0	0	0	0	0	0	0.12	0	0	0	0	0	0	0	0	0.1	0	0	0.06	0	0.11	0.08	0.15	0	0	0.03	0	0.05	0	0	0	0	0.05	0.06	0.13	0	0.09	0.09	0.09	0.11	0	0	0
4930455F16Rik	NR_040570,NR_040571,NR_040572	0	0.1	0	2.03	0	0.09	0	0.11	0.15	0	0	0.41	0.67	0.33	0	0.2	0.24	0	0	0	0	0.11	0	0	0	0	0	0	0	0	0	0.14	0.13	0	0	0	0.4	0.12	0	0.15	0.28	0.33	0.07	0.22	0.14	0	0	0.51
4930455H04Rik	NR_040596	0	0	0	0	0.05	0	0	0	0	0	0	0.07	0.12	0	0	0	0	0	0	0.07	0	0	0	0	0	0	0	0	0	0	0	0.07	0	0.08	0	0	0	0	0	0	0	0	0	0	0	0	0	0
4930455J16Rik	NR_045469	0	0	0	0	0	0.07	0	0	0	0	0.08	0	0.4	0	0	0	0	0	0.05	0	0	0	0	0	0	0.06	0	0	0	0	0.07	0	0	0	0	0	0	0.11	0	0	0	0	0	0	0.06	0	0.06	0.21
4930456L15Rik	NR_045887	0	0	0	0	0	0	0	0	0	0	0	0	0	0	0	0	0	0	0	0	0	0	0	0	0	0	0	0	0	0	0	0	0	0	0	0	0	0	0	0	0	0	0	0	0	0	0	0
4930459C07Rik	NR_110448	0	0.06	0	0	0	0	0	0.06	0	0	0	0	0.07	0.09	0	0	0	0	0	0	0.2	0	0.54	0	0.11	0.08	0.23	0.13	0	0.06	0.05	0	0	0	0	0	0	0.07	0	0.43	0	0.04	0.16	0.12	0	0	0.08	0.14
4930459L07Rik	NR_046190	0	0	0	0	0	0	0	0	0	0	0	0	0	0	0	0	0	0	0	0	0	0	0	0	0	0	0	0	0	0	0	0	0	0	0	0	0	0	0	0	0	0	0	0	0	0	0	0
4930461G14Rik	NR_040736	0	0	0	0	0.25	0	0.11	0	0	0.1	0	0.13	0	0.15	0	0.17	0.23	0	0.11	0	0	0	0	0	0	0	0	0	0	0	0	0	0	0	0	0	0	0.12	0	0	0	0	0	0	0	0	0	0
4930463O16Rik	NR_108059	0	0	0	0	0	0	0	0	0	0	0	0	0.03	0	0	0	0	0.03	0	0	0	0	0	0	0	0	0	0	0	0.03	0	0	0	0	0	0	0	0	0	0	0	0	0	0	0	0	0.04	0
4930465K10Rik	NR_027978	0.15	0	0.07	0	0.1	0.19	0.2	0.29	0.24	0.06	0	0.08	1.3	0.09	0.09	0.11	0.21	0.06	0.13	0.07	0.13	0.19	0	0.08	0.21	0	0	0.06	0	0	0.04	0.08	0.13	0	0	0.07	0.08	0.07	0	0.08	0.08	0.19	0.11	0	0.15	0.1	0	0
4930465M20Rik	NR_045973	0	0	0	0	0	0	0	0	0	0	0	0	0	0	0	0	0	0	0	0	0	0	0	0	0	0	0	0	0	0	0	0	0	0	0	0	0	0.06	0	0.07	0	0	0	0	0	0.08	0	0.12
4930467D21Rik	NR_045981	0	0.05	0	0	0	0	0.03	0	0	0.05	0	0.03	0.11	0	0	0	0	0	0.05	0	0	0	0	0	0	0.03	0.04	0.03	0	0	0	0	0	0	0.05	0	0.06	0	0	0.03	0	0.09	0.05	0	0	0	0	0
4930467E23Rik	NM_001039553	0	0	0	0	0	0	0	0	0	0	0	0	0.19	0	0	0	0	0.17	0.1	0	0	0	0	0	0	0	0	0	0	0	0	0	0	0	0	0	0	0	0	0	0	0	0	0	0	0	0	0
4930467K11Rik	NR_045353	0	0.1	0	0	0	0	0	0	0	0	0	0.14	0.35	0	0	0	0	0	0	0	0	0	0	0	0	0	0.2	0	0	0	0	0	0.12	0	0	0	0	0	0	0	0.15	0	0	0	0	0	0	0
4930468A15Rik	NM_001201395	0	0	0	0	0	0	0	0	0	0.16	0	0	0	0	0	0	0	0	0.08	0	0	0	0	0	0	0	0	0	0	0	0	0	0	0	0	0.09	0	0	0	0	0	0	0	0	0	0	0	0
4930469G21Rik	NM_001195189	0	0.08	0.18	0	0.2	0.52	0.28	0.31	0	0.42	0.36	0.32	3.94	0.24	0	0.56	0.37	0.5	0.35	0	0.34	0.17	0.28	0.42	0.69	0	0.88	0	0	1.38	0.24	0	0.72	0	0	0.2	0.73	0.1	0.11	0.54	0.33	0	0	0	0.1	1.91	0.21	0.18
4930470H14Rik	NR_045764	4.57	2.7	3.42	1.59	5.86	4.53	7.62	3.72	5.05	2.22	4.15	8	10.9	11.58	4.24	2.12	1.83	6.87	6.07	2.74	5.67	1.08	1.85	11.69	1.55	24.85	10.17	1.46	4.24	2.7	8.53	8.78	15.21	3.4	5.29	3.81	16.95	9.38	8.47	6.75	2.69	2.97	2.94	5.06	3.16	2.12	5.37	4.13
4930470O06Rik	NR_126087	0	0	0	0	0	0	0	0.12	0	0.37	0	0	0.52	0	0	0	0	0	0	0	0	0	0	0	0	0	0	0	0	0	0	0	0	0	0	0	0	0	0	0	0	0	0.07	0	0	0	0	0
4930470P17Rik	NR_027825	0.07	0	0.12	0	0.09	0	0	0	0	0.06	0	0.07	0.35	0.08	0	0	0	0	0.12	0.07	0	0	0	0	0	0	0.1	0	0	0	0	0	0	0	0	0	0	0.06	0.35	0.15	0.66	0.31	0.2	0.31	0.4	0.51	0.49	0.37
4930471C04Rik	NR_046192	0	0	0.1	0	0.15	0.22	0.1	0.09	0	0	0.08	0	1.17	0	0.14	0	0	0	0	0	0	0	0	0.23	0.15	0	0.49	0.09	0	0	0.13	0.23	0.1	0	0	0	0.81	0.21	0	0.6	0.12	0.57	0.06	0.34	0	0	0	0
4930471G03Rik	NR_015571	0.14	0.44	0.66	1.22	0.29	0.19	0.41	1.14	0.79	1.96	0.64	0.62	5.91	0.7	0.56	1.03	1.62	0.37	1.42	0.14	0.38	1.36	0	0	1.43	0.15	1.3	0.85	0.7	0.71	0.09	0.47	0.53	0	0.68	0.14	1.22	0.42	0	0.32	0.97	0.68	0.66	0.23	0.29	0	0.46	0.53
4930471M09Rik	NR_045980	0.08	0	0	0	0.06	0.11	0.08	0.13	0	0	0.06	0	0.07	0.2	0	0	0	0.07	0.23	0	0	0.14	0	0.09	0	0.17	0	0	0	0	0.1	0.09	0	0	0.13	0	0.09	0	0	0	0.09	0.18	0.04	0.13	0.17	0.22	0	0
4930473A02Rik	NR_040348	0.07	0.05	0.12	0	0	0.09	0.06	0.05	0.15	0.06	0	0.07	0.12	0.08	0	0	0.12	0	0	0	0	0.06	0	0	0	0.07	0	0	0	0	0.04	0.07	0.12	0.08	0	0.07	0.07	0.13	0.07	0.3	0.07	0.1	0	0	0	0.09	0	0
4930473O22Rik	NR_045356	0	0	0	0	0	0	0	0	0	0	0	0	0.17	0	0	0	0	0	0	0	0	0	0	0	0	0	0	0	0	0	0.04	0.07	0.06	0	0	0	0.07	0.06	0	0	0.07	0	0	0	0.06	0	0.07	0.12
4930474G06Rik	NR_045398	0	0	0	0	0	0	0	0	0	0	0	0	0	0	0	0	0	0	0	0	0	0	0	0.03	0	0	0	0	0	0	0	0	0	0	0	0	0	0	0.1	0.04	0	0	0.03	0	0	0	0.04	0
4930474H20Rik	NR_045712	0	0	0	0	0	0	0	0	0	0	0	0	0	0	0	0	0.06	0	0	0	0	0	0	0	0	0	0	0	0	0	0	0	0	0	0	0	0	0	0	0	0	0	0	0	0	0	0	0
4930474M22Rik	NR_027986	0	0	0	0	0	0	0	0.13	0	0.27	0.12	0	0.14	0	0	0.23	0	0	0	0	0.14	0	0	0	0	0	0	0	0.19	0	0	0	0	0.19	0	0	0	0	0	0	0	0	0	0.25	0	0	0	0
4930474N05Rik	NM_175008	0	0	0	0	0	0	0	0	0	0	0.08	0	0.3	0	0	0	0.11	0	0	0	0	0	0	0	0	0	0	0	0	0	0	0	0	0	0	0	0	0	0	0	0.13	0	0	0	0	0	0	0
4930474N09Rik	NR_038130	0.08	0.06	0	0	0.05	0.1	0	0.06	0	0.13	0	0.08	0.63	0	0	0	0.52	0	0.35	0.16	0	0.14	0	0	0	0.08	0.12	0	0	0.07	0	0	0.07	0	0.12	0	0.08	0	0	0.18	0.18	0.04	0	0	0	0.31	0.08	0
4930477N07Rik	NR_126085,NR_126086	0	0	0	0	0	0.1	0	0	0	0	0.12	0	0	0	0	0	0	0	0	0	0	0	0	0	0	0	0	0	0	0	0	0	0	0	0	0	0	0	0	0	0	0	0	0	0	0	0	0
4930478L05Rik	NR_040569	0	0	0	0.31	0	0.03	0.04	0	0	0	0.04	0	0	0	0	0	0	0.04	0.04	0.1	0	0	0	0.1	0	0.1	0	0	0	0	0	0	0	0.06	0.08	0	0	0	0	0.05	0	0	0.03	0	0.1	0.13	0	0
4930478P22Rik	NR_046060	0	0	0	0	0	0	0	0	0	0	0.03	0	0.59	0.21	0.06	0	0.04	0	0.08	0	0	0	0	0	0	0	0	0	0.05	0	0	0	0.04	0	0	0	0	0	0.05	0	0	0	0.02	0	0	0	0	0
4930479D17Rik	NR_046277	0	0	0	0	0	0.17	0	0	0.14	0	0	0	0.12	0.16	0	0	0	0	0	0	0.23	0	0	0	0.18	0	0	0	0	0	0	0	0	0	0	0	0.27	0	0	0	0	0	0	0	0	0	0	0
4930480E11Rik	NM_001177966	0	0	0	0	0	0	0	0.05	0	0	0.05	0	0.05	0	0	0	0	0.05	0	0	0	0	0	0	0	0	0.09	0	0.08	0	0	0	0	0	0	0	0	0	0	0	0.07	0	0	0	0	0	0.07	0
4930480G23Rik	NR_040768	0	0.06	0	0	0	0.05	0	0.12	0	0.06	0	0	0	0	0	0	0.21	0	0	0	0.06	0	0.15	0	0.52	0	0.11	0	0.18	0.24	0.27	0	0.2	0	0	0.37	0	0	0	0.08	0	0	0	0.12	0	0	0	0
4930480K15Rik	NR_045463	0	0	0	0	0	0	0	0	0	0	0	0	0	0	0	0	0	0	0	0	0	0	0	0	0	0	0	0	0	0	0	0	0	0	0	0	0	0	0	0	0	0	0	0	0	0	0	0
4930480M12Rik	NR_046278	0	0	0	0	0	0	0	0	0	0	0	0	0	0	0	0	0	0	0	0	0	0	0	0	0	0	0	0	0	0	0	0	0	0	0	0	0	0	0	0	0	0	0	0	0	0	0	0
4930481A15Rik	NR_015545,NR_027938	0	0.17	0.13	0	0.23	0.14	0.16	0.1	0.28	0.25	0.11	0.04	0.04	0.15	0.11	0.31	0.2	0.14	0.33	0.04	0.13	0.14	1.22	0.18	0.12	0.25	0.43	0.14	0.46	0.31	0.26	0.18	0.27	0.26	0.2	0.25	0.04	0.12	0.14	0.32	0.33	0.76	0.04	0.23	0.37	0.09	0.27	0.67
4930482G09Rik	NR_108044	0	0	0	0.24	0	0	0	0	0.13	0	0	0	1.12	0.14	0	0	0.21	0	0.31	0	0	0	0	0	0	0.12	0.17	0	0	0	0	0	0.1	0	0	0.34	0.24	0.11	0	0.25	0.13	0.24	0	0	0	0.15	0	0.21
4930483J18Rik	NR_015603	0	0	0.08	0	0	0.06	0.24	0.14	0	0	0.13	0.09	1.44	0	0	0.12	0	0.07	0	0	0	0.07	0.36	0.09	0	0.09	0.13	0.07	0.21	0.07	0.1	0.27	0.15	0	0.27	0.34	0.09	0.25	0	0.28	0.29	0.49	0.04	0.27	0.09	0	0.18	0
4930483K19Rik	NR_045354	0.15	0.23	0.21	0.32	0.41	0.3	0.63	0.18	0.25	0	0.06	0.56	0.47	0.55	0.29	0.11	0	0.06	0.14	0.98	0.33	0.32	0.05	1.37	0.31	2.3	0.22	0.41	0.18	0.12	1.06	0.72	1.71	0.47	0.59	0.59	1.85	0.22	0.65	0.25	0.17	0.84	0.43	0.12	0.15	0	0.24	0.26
4930483O08Rik	NR_046279	0.18	0	0	0	0.12	0	0.08	0.22	0	0	0	0.1	0	0.22	0	0.13	0	0.23	0.16	0.09	0.08	0	0	0.1	0	0	0.14	0	0.11	0	0.28	0	0.08	0.11	0	0	0.1	0	0.39	0.3	0.1	0.09	0.56	0	0	0	0.19	0.17
4930486F22Rik	NR_038024	0	0	0	0	0	0	0	0	0	0	0	0	0.47	0	0	0	0.16	0	0.31	0	0	0	0	0	0	0	0	0	0	0	0	0	0	0	0	0	0	0	0	0	0	0	0	0	0	0	0	0.32
4930486I03Rik	NR_045734	0.13	0	0	0	0.18	0.24	0.12	0	0.16	0.11	0	0.39	0.75	0	0.31	0	0	0	0.24	0	0.12	0.11	0	0	0	0	0	0	0	0.1	0.16	0	0.12	0	0	0.12	0.13	0.26	0	0	0.14	0	0	0.2	0	0	0	0
4930486L24Rik	NM_178098	0.73	1.44	0.55	1.01	0.96	0.92	0.62	0.53	0.52	0.46	0.74	1.01	0.95	1.29	1.04	0.19	0.5	0.85	0.72	1.21	0.76	1.38	1.04	1.22	1.79	0.88	1.1	0.69	1.48	2.6	1.35	0.79	0.67	0.41	0.63	0.54	1.35	1.36	0.79	0.6	0.75	1.23	0.49	1.16	1.09	0.35	0.5	0.74
4930487D11Rik	NR_046191	0	0	0	0	0	0	0	0.25	0	0	0	0	0	0	0	0	0	0	0	0	0	0	0	0	0	0	0	0	0	0	0	0	0	0	0	0	0	0	0	0	0	0	0	0	0	0	0	0
4930487H11Rik	NR_040601	0	0	0	0	0.07	0	0	0	0	0.09	0	0	0	0.13	0	0	0.1	0	0.09	0.1	0	0	0	0	0	0.22	0.16	0	0	0	0	0	0.19	0	0	0.21	0	0.1	0	0	0	0	0	0.17	0	0	0	0
4930488B22Rik	NR_040627	0	0	0	0	0.07	0	0	0	0	0	0	0	0	0	0	0	0	0	0	0	0	0	0	0	0	0	0.08	0	0	0	0	0	0	0	0	0	0	0	0	0	0	0	0	0	0	0	0	0
4930488L21Rik	NR_026888	0	0.04	0.22	0	0.17	0.1	0.18	0.12	0.11	0.58	0.22	0.16	3.3	0.35	0.19	0.49	0.46	0.12	0.31	0	0.04	0.04	0	0.05	0.14	0	0	0.08	0.18	0.12	0.09	0.1	0.18	0	0	0.1	0.42	0	0.26	0.27	0.22	0.21	0.08	0	0.05	0.45	0.05	0.54
4930500F04Rik	NR_045758	0	0.13	0	0	0.23	0	0	0.13	0	0	0.12	0	0.3	0	0	0.73	0.16	0	0	1.5	0.59	1.75	1.53	0.9	0.48	1.59	0.77	1.72	0.62	0.56	0.83	1.11	1.25	2.86	0.8	2.17	0.89	0.5	0.9	2.79	0.58	0.97	1.9	1.08	1.55	2.61	2.34	1.25
4930500J02Rik	NR_040322,NR_040323	0	0	0	0	0	0	0	0	0	0	0.25	0	0.15	0	0	0	0	0	0.1	0.11	0.19	0	0	0	0.24	0.17	0.16	0	0	0	0	0	0.15	0	0	0	0	0.1	0.11	0	0.24	0	0	0.53	0	0	0.11	0.2
4930500L23Rik	NR_040701	0	0	0	0	0	0	0	0	0	0	0	0	0	0	0	0	0	0	0	0	0	0	0	0	0	0	0	0	0	0	0	0	0.12	0	0	0	0	0	0	0	0	0	0	0	0	0	0	0
4930502A04Rik	NR_040737	0.11	0	0	0	0	0	0.1	0	0	0	0	0	0.19	0	0	0	0	0	0	0	0	0	0	0	0	0	0	0	0	0	0	0	0	0	0	0	0.12	0	0	0	0	0	0	0	0	0.42	0	0
4930502E09Rik	NR_046281	0	0	0.23	0	0.17	0	0.71	0.1	0.28	0	0.19	0.14	0	0.15	0	0.18	0	0.21	0.11	0.25	0.33	0	0	0	0	0.39	0	0.32	0.77	0	0.54	0	0.35	0.61	0	0.25	0.13	0	0.27	0	0.43	0.33	0.19	0.4	0.13	0	0	0.23
4930502E18Rik	NM_029142	0	0.06	0	0	0	0	0.07	0	0.08	0	0	0.08	0.21	0	0	0.33	0	0	0	1.61	1.89	0.92	0.32	2.96	2.7	1.56	1.38	1.19	1.41	1.53	3.29	1.73	1.61	1.88	1.09	1.15	2.94	2.38	0	0.17	0	0	0.04	0	0.08	0	0	0.14
4930503B20Rik	NM_029144	1.51	1.6	2.13	0	1.77	1.82	2.12	2.57	0.94	1.06	1.57	1.9	17.83	2.62	1.01	1.27	2.49	2.52	3.05	1.22	2.16	2.03	2.37	2.25	3.28	1.35	2.6	2.01	0.96	2.18	2.02	3.69	2.02	2.13	1.24	2.82	5.92	1.03	1.85	1.91	1.48	1.72	1.73	1.78	1.59	1.67	1.83	2
4930503E14Rik	NM_029131	0.14	0.22	0.06	0	0.04	0.09	0.11	0	0.08	0.37	0	0.08	0.89	0.09	0.28	0.1	0.26	0.18	0	0.43	0.5	0.74	0.75	0.23	0.58	0.45	0.43	0.43	0.78	0.74	0.45	0.1	0.27	0.7	0.34	1.14	0.38	1.04	0.54	0.81	0.72	0.41	0.44	0.46	0.69	0.46	0.19	0.53
4930503E24Rik	NR_028310	0	0.05	0	0	0	0	0	0	0	0	0	0	0	0	0	0.1	0.06	0	0	0	0	0.06	0	0	0	0	0	0	0	0	0.04	0	0	0	0	0	0	0	0	0	0	0	0	0	0	0	0.07	0
4930503H13Rik	NR_033598	0	0	0	0	0	0	0	0	0	0	0	0	0.14	0	0	0	0	0	0	0	0	0	0	0	0	0	0	0	0	0	0	0	0	0	0	0	0	0.3	0	0	0	0	0	0	0	0	0	0
4930503L19Rik	NM_172967	1.41	1.82	1.19	1.62	1.78	1.26	1.5	1.35	1.61	2.33	1.29	1.61	4.28	2.98	0.97	1.71	1.26	1.49	2.63	1.11	0.87	1.02	1.34	1.18	0.22	1.39	1.47	0.99	1.36	0.75	1.25	1.05	1.14	1.11	1.74	1.07	1.18	1.44	1.02	1.06	0.92	0.91	1.03	1.55	1.12	0.98	1.01	1.39
4930503O07Rik	NR_040477	0	0	0	0	0	0	0.16	0	0.19	0	0	0	0.3	0	0	0	0	0	0.15	0	0	0	0	0	0	0	0	0	0	0.14	0	0	0	0	0	0	0	0	0	0	0	0	0	0	0	0	0	0
4930504O13Rik	NM_207527	0	0	0.15	1.73	0.55	0.54	0.61	0.52	0	0.42	0.48	0.35	5.24	0.79	0	1.4	0.3	0.41	0.73	0	0.14	0.28	0	0	0.23	0.17	0	0.14	0	0.13	0.2	0.71	0.6	0	0	0.64	0.34	0.16	0.17	0.18	1.47	1.02	0.25	0	0.5	0.42	0.35	0.6
4930505A04Rik	NM_001100394	0.1	0.16	0	2.17	0.21	0.13	0.19	0.16	0.11	0.17	0.22	0.55	3.53	0.12	0	0.15	0.29	0.09	0.64	0	0	0	0	0.22	0.14	0	0.3	0.17	0.62	0.17	0	0.33	0.09	0.25	0	0	0.65	0.2	0	0	0.23	1.59	0	0.16	0.1	0.53	0.11	0.37
4930505G20Rik	NR_045761	0	0	0	0	0	0	0	0.14	0	0	0	0	0	0	0	0	0	0	0	0	0	0	0	0	0	0	0	0	0	0	0	0	0	0	0	0	0	0	0	0	0.2	0	0	0	0	0	0	0
4930506A18Rik	NR_126090,NR_126091	0.09	0	0	0	0	0	0	0.07	0.1	0.08	0.07	0.2	0.25	0.11	0	0	0	0.16	0.08	0	0	0	0	0	0	0	0	0	0	0	0	0	0	0	0	0	0	0	0	0	0	0.25	0	0	0	0	0	0
4930506C21Rik	NR_073374	0.1	0.3	0.26	0.62	0.52	0.19	0.09	0.31	0.32	0.33	0.5	0.31	0.09	0.23	0.37	0.28	0.36	0.49	0.43	0.1	0.51	0	1.28	0.31	0.27	0.59	0.86	0.17	0.12	0.16	0.18	0.1	0.79	0.12	0.15	0.19	0.31	0.65	0.42	0.32	0.86	0.3	0.2	0.15	0.29	0.25	0.62	0.36
4930506M07Rik	NM_001114312,NM_175172	4.85	3.67	3.94	3.14	4	3.68	3.89	3.69	3.95	3.39	3.85	3.28	3.85	3.65	3.3	4.8	3.31	4.16	3.89	7.76	9.41	5.59	7.43	9.88	4.99	7.68	13.45	6.1	7.96	7.37	8.37	10.58	8.19	9.06	8.98	8.69	9.05	10.55	17.57	15.68	12.71	13.16	14.55	18.21	16.09	16.37	13.21	16.97
4930507D05Rik	NR_027926	0.29	0.16	0.11	0.09	0.42	0.32	0.35	0.17	0.28	0.14	0.19	0.49	0.44	0.1	0.05	0.18	0.51	0.24	0.26	0.13	0.3	0.11	0.25	0.18	0	0.21	0.18	0.22	0.1	0.17	0.23	0.22	0.27	0.41	0.2	0.3	0.18	0.12	0.41	0.56	0.37	0.2	0.17	0.26	0.34	0.54	0.36	0.46
4930507D10Rik	NR_110449	0	0	0	0	0	0	0	0.06	0.09	0	0	0	0.43	0	0.1	0	0.08	0.07	0	0.08	0	0	0	0	0	0	0	0	0	0	0	0	0	0	0	0	0.17	0	0	0	0	0	0	0	0	0.21	0	0
4930509E16Rik	NR_045735	0.08	0	0.07	0	0.05	0.05	0.07	0.06	0.17	0	0	0.08	0	0	0	0	0.07	0.26	0	0.08	0	0	0	0.42	0.11	0.47	0	0.07	0.1	0	0.05	0.42	0.07	0	0	0	0	0.08	0.25	0.52	0.17	0.69	0.56	0.25	0.16	0.81	0.58	0.29
4930509J09Rik	NR_040547	0	0	0	0	0	0	0	0	0	0	0	0	0.05	0	0	0	0	0	0	0.06	0	0	0	0.06	0	0	0	0	0	0	0	0	0.05	0.07	0	0	0	0	0	0	0	0	0	0	0	0	0	0
4930509K18Rik	NR_040663	0	0	0	0	0	0	0	0	0	0	0	0	0.04	0	0	0	0	0	0.05	0	0	0	0	0	0	0	0	0	0	0	0	0	0	0	0	0	0	0	0	0	0	0	0	0	0	0	0	0
4930511A02Rik	NR_045966	0	0	0.04	0	0	0.03	0	0.04	0	0	0	0.05	0.67	0.06	0	0.07	0.13	0.04	0.04	0	0	0.04	0	0	0	0.05	0	0	0	0	0	0	0.09	0	0	0	0.1	0.05	0	0	0.05	0	0.1	0	0	0	0.2	0
4930511E03Rik	NR_040761	0	0.03	0	0	0	0.03	0.04	0.06	0.04	0	0.06	0	0.04	0	0	0	0	0.03	0.15	0.08	0	0.03	0.03	0.09	0.06	0.08	0.24	0.21	0.1	0.2	0.17	0.04	0.22	0	0.06	0	0	0.04	0.13	0.09	0.09	0	0.08	0.13	0.08	0.05	0	0.07
4930511M06Rik	NR_015494,NR_027944,NR_027945	3.31	3.19	3.33	1.99	4.89	3.63	5.4	4.23	4.6	3.32	3.22	4.85	5.18	6.09	4.09	3.69	3.05	4.98	4.25	3.22	3.75	3.24	2.66	5.27	2.89	7.65	7.79	3	3.19	4.23	5.23	5.21	7.24	4.22	4.33	3.18	5.9	4.4	6.31	6.4	3.98	4.97	4.79	5.93	4.62	6.02	5.04	5.59
4930512B01Rik	NR_033573	0	0.15	0	0	0	0	0	0	0	0	0	0	0	0	0	0	0	0	0.12	0.07	0	0	0	0	0	0.13	0	0	0	0	0	0	0	0	0	0	0	0.06	0	0	0	0	0	0.1	0	0	0	0
4930513D17Rik	NR_045416	0.08	0	0.07	0	0	0	0.07	0	0.08	0.07	0.11	0.08	0	0	0	0	0	0	0	0	0	0	0	0	0	0	0	0	0	0	0	0.25	0	0	0	0	0	0	0	0	0.17	0	0.08	0.12	0	0	0	0
4930513N10Rik	NR_015574	0.55	0.55	0.59	0.56	0.59	0.54	0.98	0.69	0.57	0.63	0.64	0.58	2.17	0.89	0.71	0.6	0.27	0.43	0.84	0.36	0.68	0.11	0	0.93	0.18	0.64	0.91	0.44	0.43	0.29	0.57	0.79	0.52	0.63	0.51	0.42	0.72	0.71	1.53	1.26	1.07	1.39	0.65	0.96	0.39	0.88	0.76	0.89
4930513O06Rik	NM_029174	0	0	0	0	0.08	0	0	0	0	0.1	0	0	0.11	0	0	0	0	0	0	0	0.1	0	0	0	0	0	0.35	0	0	0	0.22	0.38	0.11	0	0	0.23	0	0	0.25	0.13	0.27	0.25	0.67	0.19	0.12	0.61	0.38	0.44
4930515B02Rik	NR_040654	0	0	0	0	0	0	0.15	0	0	0	0	0	0	0	0	0	0	0	0	0	0	0	0	0	0	0	0	0	0	0	0	0	0	0	0	0	0	0	0	0	0	0	0	0	0	0	0	0
4930515G01Rik	NR_027872	0.95	0.96	1.49	0.79	1.46	0.97	1.38	2.4	0.57	0.88	0.55	0.71	1.51	3.64	0.76	1.17	1.32	1.18	2.65	0.88	1.68	1.52	1.5	1.26	0.21	1.27	1.76	1.07	1.36	2.2	0.95	1.19	0.87	1.08	1.63	1.77	0.78	1.14	0.48	0.99	0.91	1.67	1.26	1.28	0.82	1.53	0.71	0.95
4930515G16Rik	NR_003100	0	0	0	0	0	0	0	0	0	0	0	0	0.19	0	0	0	0	0	0	0	0	0	0	0	0	0.68	0	0	0	0	0	0	0.4	0	0	0.21	0	0	0	0	0	0	0	0	0.22	0.27	0	0
4930515L03Rik	NR_040632	0	0	0	0	0	0	0	0	0	0	0	0	0	0	0	0	0	0	0	0	0	0	0	0	0	0	0	0	0	0	0	0	0	0	0	0	0	0	0	0	0	0	0	0	0	0	0	0
4930515L19Rik	NR_045440	0	0	0	0	0	0	0	0	0	0	0	0	0	0	0	0	0	0	0	0	0	0	0	0	0	0	0	0	0	0	0	0	0	0	0	0	0	0	0	0	0	0	0	0	0	0	0	0
4930517E11Rik	NR_040611	0	0	0	0	0	0	0	0	0	0	0	0	0	0	0	0	0	0	0	0	0	0	0	0	0	0	0	0	0	0	0	0	0	0	0	0	0	0	0	0	0	0	0	0	0	0	0	0
4930518P08Rik	NR_045364	0	0	0	0	0	0	0.07	0	0	0	0	0	0	0	0	0	0	0	0	0	0	0	0	0	0	0	0	0	0	0	0	0	0	0	0	0	0	0	0	0	0	0	0	0	0	0	0	0
4930519D14Rik	NR_045975	0	0	0	0	0	0.05	0	0	0	0.07	0	0	0.44	0	0	0.23	0.08	0	0.15	0	0	0	0	0	0	0	0	0	0	0	0	0	0	0	0	0	0.09	0	0	0	0	0	0	0	0	0	0.09	0
4930519F09Rik	NR_033601	1.12	0.75	0.6	1.24	1.41	1.01	1.14	1.02	0.67	0.94	0.66	1.24	0.88	1.93	1.56	0.83	0.74	1.46	0.65	0.66	0.89	1.03	0.61	1.3	0.63	1.88	2.03	1.26	1.02	0.55	0.93	0.62	1.66	0.74	0	1.08	1.9	1.14	1.2	1.13	0.68	0.31	1.17	0.93	0.95	0.67	0.74	0.62
4930519F16Rik	NM_029170	0	0.18	0	0.68	0.22	0	0	0.06	0	0	0.06	0.09	0.28	0	0	0	0	0.13	0.21	0.24	0.14	0.07	0	0.09	0	0.08	0	0.14	0.19	0.13	0.19	0.17	0.29	0.1	0	0	0	0.23	0.09	0	0.09	0.71	0.37	0	0.16	0.31	0.42	0.29
4930519F24Rik	NR_040763	0	0	0	0	0	0	0	0	0	0	0	0	0.15	0	0	0	0	0	0	0	0	0	0	0	0	0	0	0	0	0	0	0	0	0	0	0	0	0	0	0	0	0	0.26	0	0	0	0	0
4930519G04Rik	NM_026263	0	0.04	0.04	0	0.04	0.06	0	0.05	0	0	0.03	0	0.8	0.27	0.17	0.13	0.22	0.01	0.13	0.23	0	0	0	0.08	0	0	0.07	0.14	0	0.1	0.12	0.14	0	0	0	0	0.02	0	0.1	0.15	0	0.45	0.02	0.07	0	0	0.14	0
4930519H02Rik	NR_045974	0.1	0	0	0	0	0.06	0.09	0	0.11	0.41	0	0	0.69	0	0.12	0.14	0	0.08	0	0	0	0	0	0	0.14	0	0	0	0	0.16	0	0	0	0	0	0	0	0	0.1	0.11	0.11	0	0.05	0.15	0	0.25	0.21	0
4930520O04Rik	NR_040383,NR_040384	0.53	1.57	0.39	0	0.36	0.65	0.5	0.88	0.5	1.74	0.86	0.79	0.54	1.37	0.79	0.49	0.16	0.62	0.99	2.56	1.74	2.86	3.04	1.87	2.63	1.73	2.21	2.54	2.61	1.63	2.52	2.47	1.59	2.42	2.15	2.14	1.45	1.76	0.98	0.85	0.86	0.58	1.15	1.21	1.25	0.33	0.54	0.31
4930520P13Rik	NR_036596	0	0	0	0	0	0	0	0	0	0	0	0	0	0	0	0	0	0	0	0	0	0	0	0	0	0	0	0	0	0	0	0	0	0	0	0	0	0	0	0	0	0	0	0	0	0	0.21	0
4930521E06Rik	NR_040602	0	0	0	0	0	0	0	0	0	0	0	0	0	0	0	0	0	0	0	0	0	0	0	0.22	0	0.11	0	0	0.13	0	0	0	0	0	0	0	0	0	0	0	0	0	0	0	0	0	0	0
4930522H14Rik	NM_001199090,NM_026291	0.11	0	0	0	0	0.14	0.1	0.17	0	0.19	0	0	1.62	0.13	0.28	0.16	0	0	0.2	0.44	0.38	0.38	0.38	0.12	0.47	0	0	0.09	0.13	0.09	0.4	0.57	0.2	0.13	0	0.22	0.35	0.43	0.35	0.36	0.37	0	0.27	0.68	0.11	0.57	0.68	0.2
4930522O17Rik	NR_040665	0	0.17	0.2	0	0	0	0	0.35	0	0	0.16	0	2.2	0.54	0.57	0.32	0.41	0	0.4	0	0	0	0	0	0	0	0.34	0	0	0	0	0	0	0.8	0	0	0.23	0.22	0	0.24	0.25	0.58	0	0	0	0	0	0
4930523C07Rik	NM_001162896,NR_028111	3.02	3.76	2.19	3.7	3.23	2.74	3.75	2.12	3.69	5.13	2.72	4.55	3.68	3.6	3.68	4.53	4.08	5.9	3.09	9.32	5.17	8.49	4.55	7.57	7.8	8.98	8.85	10.71	5.96	5.88	8.72	4.78	8.21	7.21	3.78	5.49	5.46	7.4	2.13	2.88	2.25	1.78	2.42	3.31	2.61	1.89	2.62	2.84
4930523O13Rik	NR_040451	0	0	0	0	0	0.05	0	0	0	0.12	0	0.08	0.57	0.09	0	0.1	0	0.06	0.06	0	0	0	0	0	0	0	0.11	0.06	0	0	0	0	0.06	0	0	0	0.15	0.07	0.08	0	0	0.11	0	0	0	0.28	0	0.13
4930524B15Rik	NM_026262	0	0	0	0	0	0.06	0.04	0.07	0	0.08	0.03	0	1.4	0.06	0	0	0.22	0	0.13	0	0.04	0	0	0	0	0	0	0	0	0	0	0.15	0.13	0	0	0	0	0	0	0.05	0	0	0	0	0.05	0	0	0.09
4930524B17Rik	NR_126084	0	0	0	0	0	0	0	0.04	0	0	0	0	0	0	0	0	0	0	0	0	0	0	0	0	0	0	0	0	0	0	0	0	0	0	0	0	0	0	0	0	0	0	0	0	0	0	0	0
4930524C18Rik	NR_045661	0	0	0	0	0	0	0	0	0	0	0	0	0	0	0	0	0	0	0	0	0	0	0	0	0	0	0	0	0	0	0	0	0	0	0	0	0	0	0	0	0	0	0	0	0	0	0	0
4930524N10Rik	NM_001256259	0	0	0	0	0	0	0.29	0	0.23	0	0	0	0.46	0	0	0	0	0	0	0	0	0	0	0.11	0	0.1	0	0	0	0	0	0	0.19	0	0	0	0	0	0	0	0	0.27	0	0	0.1	0	0	0
4930524O05Rik	NR_045316	0.16	0	0	0	0	0	0	0	0	0	0	0	0	0	0	0	0	0	0	0	0	0	0	0	0	0	0	0	0	0	0	0	0	0	0	0	0	0	0	0	0	0	0	0	0	0	0	0
4930524O08Rik	NR_040735	0	0.1	0.23	0	0.09	0.04	0.06	0	0.14	0	0.05	0.2	0.06	0.08	0	0.18	0	0.21	0	0.44	0.06	0.11	0.4	0.07	0.18	0.26	0.19	0.16	0.23	0.05	0.12	0.2	0	0.08	0.1	0	0	0.12	1.29	1.69	1.13	1.39	1.28	1.5	0.45	1.65	0.47	1.05
4930525D18Rik	NR_040738	0	0.08	0	0	0.14	0.26	0.28	0	0	0.17	0.07	0.22	1.43	0.12	0.26	0	0.38	0.17	0.09	0.2	0	0.09	0.28	0	0	0.31	0.3	0.17	0.12	0.17	0.12	0.11	0.27	0	0.32	0.1	0	0	0.32	0.22	0	0	0.31	0.79	0.2	0	0	0
4930525G20Rik	NR_045194	0.03	0.12	0.03	0.52	0.04	0.06	0.17	0.1	0.03	0	0	0.06	0.29	0.14	0	0.17	0.09	0.08	0.11	0.03	0.03	0.05	0	0.03	0	0	0.09	0	0	0.1	0.04	0	0.03	0	0.05	0.03	0.03	0.06	0.07	0	0.03	0	0.06	0	0.03	0	0.03	0.06
4930526I15Rik	NR_015516,NR_027950,NR_102721	11.64	13.04	13.88	15.74	15.08	7.78	8.22	19.57	9.81	17.12	14.31	12.09	10.37	11.7	10.98	10.85	17.6	11.98	14.38	14.02	10.8	13.63	14.39	12.51	9.77	5.3	9.34	13	8.83	11.3	11.27	8.56	9.1	13.9	7.53	11.69	8	9.6	14.11	13.63	10.88	18.16	19.7	12.8	10.31	15.11	20.44	7.85
4930526L06Rik	NR_045317	0	0	0	0	0	0	0	0	0	0.23	0	0	0.08	0.11	0.12	0	0	0	0	0.18	0.08	0	0	0	0	0.09	0	0.08	0	0	0	0	0.08	0	0	0.09	0	0	0	0	0	0	0	0	0	0	0.2	0
4930527F14Rik	NR_045809	0	0	0	0	0	0	0	0	0	0	0	0	0.12	0	0	0	0	0.11	0.23	0	0.11	0	0	0	0	0	0	0	0	0	0	0	0	0	0	0	0	0	0	0	0	0	0	0	0	0.17	0	0
4930527G23Rik	NR_045395	0	0	0	0	0	0.11	0	0	0	0.14	0	0	0.45	0	0	0.24	0	0	0	0	0	0	0	0	0	0	0	0	0	0	0	0	0	0	0	0	0.18	0	0	0	0	0	0	0	0	0	0	0
4930528A17Rik	NR_028384	0.35	0.24	0.2	0.19	0.35	0.31	0.48	0.58	0.14	0.18	0.19	0.46	0.53	0.41	0.5	0.25	0.12	0.32	0.5	0.31	0.5	0.44	0.52	0.19	0.3	0.43	0.58	0.64	0.48	0.47	0.6	0.41	0.28	0.48	0.68	0.35	0.55	0.42	0.56	0.29	0.29	0.23	0.62	0.61	0.57	0.51	0.7	0.55
4930528D03Rik	NR_045977	0.67	0.46	0.18	2.25	0.61	0.44	0.42	0.89	0.33	0.32	0.17	0.56	0.8	0.72	0.48	0.86	0.15	0.63	0.47	0.22	0.46	0.38	1.57	0.24	0.21	0.38	0.78	0.64	0.09	0.93	0.36	0	0.34	0.64	0.12	0.6	0.79	0.58	0.8	0.61	0.37	0.16	0.54	0.35	0.65	1.49	1.43	0.96
4930528P14Rik	NR_040516	0	0	0	0	0	0	0	0	0	0	0	0	0	0	0	0	0	0	0	0	0	0	0	0	0	0	0	0	0	0	0	0	0	0	0	0	0	0	0	0	0	0	0	0	0	0	0	0
4930529C04Rik	NR_033593	0	0.08	0	0	0.04	0.04	0.12	0	0	0	0.09	0	0.1	0.07	0	0	0	0.14	0.05	0	0.08	0	0	0.03	0.01	0.14	0.26	0	0	0.07	0.08	0.13	0.07	0.15	0.13	0	0.16	0.08	0.3	0.06	0.21	0.19	0.02	0	0.06	0	0.03	0.04
4930529K09Rik	NR_040457	0	0	0	0	0	0	0	0	0	0	0	0	0	0.19	0	0	0	0	0	0	0	0	0	0	0	0	0	0	0	0	0	0	0	0	0	0	0	0	0	0	0	0	0	0	0.16	0	0	0.29
4930529L06Rik	NR_040537	0	0	0	0	0	0	0	0.29	0	0	0.53	0	0.99	0	0	0	0	0	0	0	0	0	0	0	0	0	0	0	0	0	0	0	0	0	0	0	0	0	0	0	0.42	0	0	0	0	0	0	0
4930532M18Rik	NR_108050	0	0	0	0	0	0	0	0	0	0	0	0	0	0	0	0	0	0	0	0	0	0	0	0	0	0	0	0	0	0	0	0	0	0	0	0	0	0	0	0	0	0	0	0	0	0	0	0
4930533B01Rik	NR_040614	0	0	0	0	0	0	0.08	0	0	0	0	0	0.08	0	0	0	0	0	0	0	0	0	0	0	0	0	0	0	0	0	0	0	0	0	0	0	0	0	0	0	0	0	0	0	0	0	0	0
4930533P14Rik	NR_040478	0	0	0	0	0	0	0	0	0	0	0	0	0	0	0	0	0	0	0	0	0	0	0	0	0	0	0	0	0	0	0	0	0	0	0	0	0	0	0	0	0.19	0	0	0	0	0	0	0
4930538K18Rik	NM_029198	0.06	0.14	0.17	0	0.21	0.24	0.45	0.19	0.07	0.21	0.45	0.65	3.03	0.51	0.24	0.61	0.34	0.36	0.38	0.18	0.48	0.21	0.6	0.07	0.51	0.49	0.45	0.42	0.07	0.45	0.3	0.39	0.33	0.52	0.29	0.12	0.65	0.23	0.13	0	0.07	0.03	0.03	0.1	0.06	0.16	0.13	0
4930539C22Rik	NR_040600	0	0	0	0	0	0	0.18	0	0	0	0	0	0.09	0	0	0	0	0	0	0	0	0	0	0	0	0	0	0	0	0	0	0	0	0	0	0	0	0	0	0	0	0	0	0	0	0	0	0
4930539E08Rik	NM_172450	0.5	0.39	0.46	0.17	0.55	0.33	0.66	0.32	0.5	0.46	0.49	0.83	0.94	0.63	0.51	0.34	0.38	0.94	0.37	0.12	0.19	0.12	0.25	0.23	0.08	0.58	0.23	0.1	0.07	0.27	0.24	0.43	0.48	0.17	0.27	0.26	0.1	0.39	0.19	0.46	0.22	0.24	0.39	0.25	0.16	0.18	0.31	0.4
4930539J05Rik	NR_030689	3.53	4.51	3.83	0.84	3.65	4.25	3.59	3.32	3.73	3.39	3.21	4.12	5.71	4.35	3.83	3.69	5.01	3.73	3.02	8.18	4.14	4.61	4.28	2.33	2.27	3.76	3.91	7.18	2.67	4.24	3.26	2.83	3.48	4.77	2.21	3.32	2.93	2.15	6.35	5.85	5.43	7.23	7.98	2.53	6.26	4.57	9.49	4.4
4930539M17Rik	NR_040597	0	0	0	0	0	0	0	0	0	0	0	0	0	0	0	0	0	0	0	0	0	0	0	0	0	0	0	0	0.14	0	0	0	0	0	0	0	0	0	0	0	0	0	0	0	0	0	0	0
4930539N22Rik	NR_040598	0	0	0	0	0	0	0	0	0	0	0	0	0	0	0	0	0	0	0	0	0	0	0	0	0	0	0	0	0	0	0	0	0	0	0	0	0	0	0	0	0	0	0	0	0	0	0	0
4930540M03Rik	NR_040746	0	0	0	0	0.48	0	0	0	0	0	0	0	0	0	0	0	0	0	0	0	0	0	0	0	0	0	0	0	0	0	0	0	0	0	0	0	0	0	0	0	0	0	0	0	0	0	0	0
4930542C21Rik	NR_040565	0	0	0	0	0	0	0	0	0	0	0	0	0	0	0	0	0	0	0	0	0	0	0	0	0	0	0	0	0	0	0	0.11	0	0	0	0	0.31	0	0	0	0	0	0.2	0	0	0	0.1	0
4930542D17Rik	NR_040566	0	0	0	0	0	0	0	0	0	0	0	0	0.06	0	0	0	0	0	0	0	0	0	0	0	0	0	0	0	0	0	0	0	0	0	0	0	0	0	0	0	0	0	0	0	0	0	0	0
4930543E12Rik	NR_045978	0	0	0	0	0	0	0	0	0	0	0	0	0.17	0	0.17	0	0	0	0	0	0	0	0	0	0	0	0	0	0	0	0	0	0	0	0	0	0	0	0	0	0.07	0	0	0.1	0	0	0.07	0
4930544D05Rik	NM_001145537	0.29	0.11	0.27	0.63	0.7	0.98	0.42	0.47	0.81	0.63	0.65	0.32	7.26	1.07	0.19	2.12	1.24	1	1.59	0.29	0.64	0.63	0.82	0.47	1.26	0.15	0.22	1.12	0.18	0.61	0.45	0.16	0.41	0	0.47	0.88	2.19	1.15	0.47	0.49	1	0.15	0.38	0.23	0.3	0.76	0.79	1.09
4930544G11Rik	NM_001161773	0.13	0.39	0.06	0.14	0.61	0.42	0.77	0.81	0.07	0.71	0.66	0.48	11.25	0.99	0.16	1.1	1.85	0.48	1.37	0	0	0.55	0	0.2	0.54	0.13	0.47	0.11	0.08	0	0.08	0.34	0.35	0.16	0	0.25	1.22	0.18	0.27	0.57	1.49	0.23	0.63	0.3	0.39	0.58	0.48	1.06
4930544M13Rik	NR_045976	0	0	0	0	0	0	0	0	0	0	0	0	0	0	0	0	0	0	0	0	0	0	0	0	0	0	0	0	0	0	0	0	0	0	0	0	0	0	0	0	0	0	0	0	0	0	0	0
4930545E07Rik	NR_045374	0	0	0	0	0.07	0	0	0	0	0	0	0	0	0	0	0	0	0	0	0	0	0	0	0	0	0	0	0	0	0	0	0	0	0	0	0	0	0	0	0	0	0	0	0	0	0	0	0
4930545H06Rik	NR_045357	0	0	0	0	0	0	0	0	0	0	0	0	0.11	0	0	0	0	0	0	0	0	0	0	0	0	0	0	0	0	0	0	0	0	0	0	0	0.13	0	0	0	0.14	0	0	0	0	0	0	0
4930545L23Rik	NR_040517	0	0	0	0	0	0	0.03	0.03	0	0	0.03	0.04	0.32	0.13	0	0	0.14	0	0	0.07	0	0.03	0.38	0	0	0.07	0	0.03	0.04	0	0	0	0	0	0.06	0.04	0.04	0	0	0.04	0.12	0.27	0	0	0	0.14	0	0
4930546C10Rik	NR_038051	0	0	0	0	0	0	0	0	0	0	0	0	0	0	0	0	0	0	0	0	0	0	0	0	0	0	0	0	0	0	0	0	0	0	0	0	0	0	0	0.04	0	0	0	0	0	0	0	0
4930546K05Rik	NR_040754	0	0	0.02	0.11	0	0.02	0.02	0	0	0	0	0	0.09	0	0	0	0.1	0	0	0.13	0.13	0.07	0.21	0.24	0	0.08	0.08	0.02	0.09	0.02	0.06	0.16	0.11	0.12	0	0.1	0.03	0.1	0	0.03	0.06	0	0.07	0	0	0	0.03	0
4930547E08Rik	NR_040514	0	0	0	0	0	0	0.17	0	0	0	0	0	0	0	0	0	0	0	0	0	0	0.31	0	0	0	0	0	0	0	0	0	0	0	0	0	0	0	0	0	0	0	0	0	0	0	0	0	0
4930547E14Rik	NR_040564	0	0	0	0	0	0	0	0	0	0	0	0	0	0	0	0	0	0	0.16	0.35	0	0	0	0	0	0	0.27	0	0	0	0	0	0	0	0	0	0	0	0	0	0	0	0	0	0	0	0	0.33
4930548G14Rik	NR_045811	0	0	0	0	0.05	0	0	0	0.09	0	0	0	0.21	0	0	0	0	0	0	0	0	0	0	0	0	0	0.12	0	0	0	0	0	0	0	0	0	0.08	0	0	0	0	0	0	0	0	0	0	0
4930548H24Rik	NM_026296	0.06	0.05	0	0	0	0	0.06	0.1	0	0	0	0	0	0	0	0	0	0.11	0	0	0	0.11	0	0.14	0	0.26	0	0.06	0	0	0.12	0	0.06	0	0	0.06	0.07	0.25	0.07	0	0.07	0.41	0.13	0	0	0.17	0	0
4930548J01Rik	NR_045462	0	0	0	0	0.09	0	0	0	0	0	0	0.14	0.12	0	0	0.19	0	0	0	0	0	0.34	0	0	0	0	0	0	0	0	0	0.14	0	0	0	0	0	0	0	0.29	0.15	0	0.07	0	0.53	0.34	0	0
4930548K13Rik	NR_040656	0	0	0	0	0	0	0	0	0	0	0	0	0	0	0	0	0	0	0	0	0	0	0	0	0	0	0	0	0	0	0	0	0	0	0	0	0	0	0	0	0	0	0	0	0	0	0	0
4930549C01Rik	NM_026300	0	0	0.13	0	0	0.19	0.27	0.11	0.32	0	0.32	0	1.16	0.69	0.18	0.21	1.34	0	0.51	0	0.13	0.12	0	0.15	0.41	0.15	0.22	0	0.53	0.24	0.09	0.47	0.39	0	0	0.14	0.46	0.14	0	0	0.32	0	0	0	0	0.74	0	0
4930549G23Rik	NR_045376	0	0	0	0	0.35	0	0	0.41	0	0	0.25	0	1.56	0	0	0	0	0	0.61	0.17	0	0.14	0	0	0	0	0	0	0	0	0.1	0	0	0	0	0	0	0	0.18	0.58	0.38	0	0.54	0.27	0	0	0	0.31
4930550C14Rik	NM_029247	1.04	0.92	0.34	2.89	0.82	0.83	0.56	1.42	1.07	2.36	1.05	1.28	4.06	1.71	0.68	2.36	0.84	1.51	2.35	0.82	0.66	0.77	0.84	0.88	0.84	0.61	0.33	0.7	1.01	0.74	0.27	0.88	0.61	0.82	0.59	0.6	0.08	0.36	0.8	1.33	0.33	0.55	1.12	0.94	0.38	0.97	1.2	1.24
4930550L24Rik	NM_023774	0	0	0	0	0	0	0	0	0	0	0.04	0	1.29	0.07	0.15	0	0	0.05	0.16	0	0	0	0	0	0	0	0	0	0	0.05	0	0.06	0	0	0	0	0.06	0	0.06	0	0.07	0	0	0.09	0	0	0.06	0
4930552N02Rik	NR_040661	0	0	0	0	0	0	0	0.06	0	0.47	0.06	0	0.07	0	0	0	0	0	0	0.08	0.07	0	0	0	0	0	0.23	0	0	0	0.1	0	0.07	0	0	0	0	0	0.08	0.09	0.09	0	0	0	0	0	0.08	0
4930552P12Rik	NR_045318	0	0	0	0	0.02	0	0.03	0.03	0.04	0.03	0.11	0	0.06	0.04	0	0	0	0	0	0.15	0.1	0.22	0	0.23	0.05	0.25	0.05	0.22	0.04	0.18	0.24	0.19	0.39	0.53	0.23	0.25	0.04	0.17	0	0	0	0	0	0.06	0.04	0	0	0
4930553C11Rik	NR_126439	0	0	0	0	0	0	0.11	0	0	0	0	0	0.32	0	0	0.17	0.11	0.1	0.21	0	0	0	0	0.13	0	0	0	0.1	0	0	0	0	0	0	0	0	0.38	0.12	0	0	0	0	0.06	0	0	0.31	0	0.22
4930553E22Rik	NR_040567	0	0	0	0	0	0	0	0	0	0	0	0	0.16	0	0	0	0	0	0	0	0	0	0	0	0	0	0	0	0	0	0	0	0	0	0	0	0	0	0	0	0	0	0	0	0	0	0	0
4930554C24Rik	NR_040739	0	0	0	0	0	0	0	0	0	0	0	0	0	0	0	0	0	0	0	0	0	0	0	0	0	0	0	0	0	0	0	0	0	0	0	0	0	0	0	0	0	0	0	0	0	0	0	0
4930554I06Rik	NR_126458	0	0	0	0	0	0	0	0	0	0	0	0	0	0.2	0	0	0	0	0	0	0	0	0	0	0	0	0	0	0	0	0	0	0	0	0	0	0	0	0	0	0	0	0.08	0	0	0	0	0
4930555B11Rik	NR_040633	0	0	0	0	0	0	0	0	0	0	0	0	0	0	0	0	0	0	0	0	0	0	0	0	0	0	0	0	0	0	0	0	0	0	0	0	0	0	0	0	0	0	0	0	0	0	0	0
4930555G01Rik	NM_175393	0.63	0.87	0.34	0.59	0.32	0.51	0.32	0.51	0.3	0.8	0.13	0.39	1.96	0.24	0.38	0.43	0.77	0.65	0.78	0.48	0.37	0.21	0	0.36	0.39	0.56	0.7	0.48	0.63	0.35	0.32	0.17	0.21	0.27	0.27	0.37	0.18	0.57	0.26	0.18	0.15	0.05	0.32	0.71	0.38	0.06	0.32	0.63
4930555K05Rik	NR_126459	0	0	0	0	0	0	0	0	0	0	0	0	0.49	0	0	0	0	0	0	0	0	0	0	0	0	0	0	0	0	0	0	0	0	0	0	0	0	0	0	0	0	0.28	0	0	0	0	0	0
4930556C24Rik	NR_040506	0	0	0	0	0	0	0	0	0	0	0	0	1.2	0.37	0	0	0.1	0.09	0.19	0	0	0	0	0	0	0.11	0	0	0	0.09	0	0.11	0	0	0	0	0.33	0.1	0	0	0.12	0	0	0.16	0	0	0	0
4930556G01Rik	NR_040655	0	0	0	0	0	0	0	0	0	0	0	0	0	0	0	0	0	0	0	0	0	0	0	0	0	0	0	0	0	0	0	0	0	0	0	0	0	0	0	0	0	0	0	0	0	0	0	0
4930556J02Rik	NR_045714	0	0	0	0	0	0	0.27	0	0	0.36	0	0.31	0.38	0	0.37	0	0	0	0.13	0	0	0	0	0	0	0	0	0	0	0.12	0.09	0	0	0	0	0	0	0	0.15	0	0.16	1.33	0	0	0.29	0	0.15	0
4930556M19Rik	NR_045063,NR_045064,NR_045065	0.23	0.45	0.33	0.29	0.74	0.42	0.21	0.75	0.8	0.62	0.5	0.15	0.76	0.49	1.38	1.11	0.51	0.56	0.86	2.55	1.91	1.71	1.78	2.19	1.4	1.7	1.87	2.27	2.29	1.34	2.56	2.33	2.4	2.38	3.28	1.5	1.88	1.83	0.59	0.66	0.35	0.33	0.62	0.65	0.81	0.36	0.86	0.4
4930556N09Rik	NR_045358	0	0	0	0	0	0	0	0	0	0	0	0	0.16	0	0	0	0	0	0	0	0.08	0	0	0	0	0	0	0	0	0	0	0	0	0	0	0.09	0	0	0	0	0	0	0	0	0	0	0	0
4930556N13Rik	NR_126433	0	0	0	0	0.06	0	0.17	0	0.1	0	0	0	0.16	0	0	0	0	0	0	0	0	0	0	0	0	0	0	0	0	0	0.11	0.1	0	0	0	0	0	0	0	0	0	0	0	0.14	0	0	0	0.17
4930557A04Rik	NM_029229	0.35	0.14	0.98	0	0.12	0.12	0	0.43	0.2	0.46	0.13	0.58	4.31	0.22	0	0.51	1	0.15	0.64	0	0	0.46	0.74	0	0.25	0	0.27	0.9	0.65	0.29	0.11	0.19	0.49	0.43	0	0.7	0.94	0.35	0	0.2	0	0	0.18	0.28	0.54	0.23	0.19	0.33
4930557F10Rik	NR_126443,NR_126444	0	0	0	0	0	0	0	0.12	0	0.66	0	0.17	0.28	0	0.2	0	0	0.13	0.14	0	0	0	0	0	0.22	0	0	0	0	0	0	0	0	0	0	0	0	0	0	0	0	0	0.08	0	0	0.19	0.17	0.28
4930557J02Rik	NR_040703	0	0	0	0	0	0	0	0	0	0	0	0	0	0	0	0.12	0	0	0	0	0	0	0	0	0	0	0.13	0	0	0	0	0	0	0	0	0	0	0	0	0	0	0	0	0	0	0	0	0
4930558C23Rik	NR_015490	0	0.1	0.36	0	0	0.17	0.49	0.1	0.29	0.33	0.1	0.28	1.97	0.16	0	0.37	1.1	0.11	0.12	0.26	0.34	0.22	0	0	0.37	0.4	0	0	0	0.21	0	0.42	0.36	0	0.41	0	0.69	0.13	0	0.29	0.59	0	0.33	0	0.13	0.67	0.14	0.96
4930558F17Rik	NR_126451,NR_126451_chr5:11109799_11126455	0.36	0.18	0.11	1.03	0.49	0	0.57	0.1	0.13	0.21	0.73	0.3	7.74	0.58	0	0.35	1.25	0.2	1.3	0	0	0.1	0	0	0	0	0.36	0.1	0	0	0	0.39	0	0	0	0.36	0.38	0	0.26	0.67	0.82	0	0.31	0.19	0.12	0.16	0.26	0.89
4930558G05Rik	NR_045441	0	0	0	0	0	0	0	0	0	0	0	0	0	0	0	0	0	0	0	0	0	0	0	0	0	0	0	0	0	0	0	0	0	0	0	0	0	0	0	0	0	0	0	0	0	0	0	0
4930558J18Rik	NR_037999	1.32	2.11	1.46	0.76	2.48	1.47	2.34	2	1.66	1.21	1.73	2.08	2.04	2.44	3.61	1.59	2.08	1.97	1.99	0.35	0.74	0.08	0.44	0.71	0.31	0.27	0.46	0.19	0.27	0.07	0.38	0.19	0.2	0.11	0.35	0.13	0.24	0.47	0.33	0.25	0.05	0.19	0.28	0.14	0.4	0.06	0.14	0.24
4930558K02Rik	NM_001204904,NM_001204905	0.19	0	0	0.61	0.13	0.13	0.09	0.08	0	0	0.14	0.21	0.26	0.12	0	0.27	0.18	0	0.17	0.19	0.24	0.08	0	0.1	0.27	0.29	0.43	0.41	0.12	0.16	0.12	0.69	0.25	0.23	0.15	0.37	0.3	0.09	0	0.11	0.11	0	0.05	0	0	0	0.1	0
4930559C10Rik	NR_126436	0	0	0	0	0	0	0	0	0	0	0	0	0	0	0	0	0	0	0	0	0	0	0	0	0	0	0	0	0	0	0	0.32	0	0	0	0	0	0	0	0	0	0	0	0	0	0	0	0
4930562C15Rik	NM_030192	0.09	0.11	0.04	0	0.26	0.09	0.24	0.13	0.13	0.2	0.17	0.42	1.33	0.03	0.12	0.3	0.13	0.16	0.29	0.05	0.08	0.04	0.02	0.15	0.07	0.44	0.14	0.06	0.03	0.06	0.24	0.35	0.53	0.06	0.04	0	0.62	0.18	0.35	0.45	0.13	0.16	0.19	0.11	0.14	0.83	0.53	0.26
4930562F07Rik	NR_038030,NR_038031	0	0	0	0	0	0.11	0	0	0	0	0	0	0.42	0	0	0	0	0.15	0.32	0	0	0.3	0	0.23	0.23	0.41	0.25	0.2	0.24	0	0.1	0.18	0.34	0	0.28	0.17	0.66	0.38	0.42	0	0	0.37	0	0	0.15	0	0	0.93
4930563D23Rik	NM_029252	0.4	0.54	0.46	0.29	0.51	0.64	0.5	0.69	0.11	0.6	0.42	0.43	3.82	1.01	0.39	0.87	0.76	0.62	1.85	0.2	0.5	0.64	0.21	0.47	0.71	0.24	1.55	0.41	0.29	0.39	0.19	0.86	0.43	0.08	0.37	0.2	0.75	0.26	0.69	0.64	1.27	0.85	0.61	0.64	0.55	0.48	0.72	0.31
4930563E18Rik	NR_045379	0.06	0.05	0.05	0	0.08	0.12	0.11	0.09	0.07	0.15	0.04	0	0.05	0.14	0	0	0.17	0.05	0.05	0	0.16	0.2	0	0.19	0.25	0	0.09	0.1	0.07	0	0.14	0.06	0.37	0.22	0.19	0.29	0.19	0.34	0.06	0	0.07	0	0.03	0.19	0.12	0.15	0.06	0
4930563E22Rik	NM_001163728	0.3	0.08	0.28	0.12	0.47	0.48	0.23	0.39	0.58	0.37	0.39	0.35	0.42	0.39	0.42	0.43	0.31	0.46	0.45	0.22	0.41	0.59	0	0.47	0.15	0.41	0.24	0.47	0.27	0.25	0.22	0.2	0.32	0.48	0.3	0.05	0.32	0.26	0.39	0.59	0.46	0.47	0.67	0.35	0.47	0.68	0.65	0.61
4930563F08Rik	NR_040704	0	0	0	0	0	0	0	0.15	0	0	0	0	0	0.23	0	0	0	0.33	0	0	0.33	0	0	0	0	0	0	0	0	0	0	0	0	0	0	0	0	0.19	0	0	0	0	0	0	0	0	0	0
4930563H07Rik	NR_126454	0	0	0	0	0	0.2	0	0	0	0	0.34	0	0	0	0	0	0	0	0	0.15	1.08	0.4	1.51	0.33	0.44	0.16	0.46	0.26	0.57	0.13	0.66	0.17	0.42	0.75	2.19	0.31	0.33	0.15	0.16	0.17	0	0.24	0.16	0	0.31	0.2	0	0
4930563M20Rik	NR_046193	0	0	0	0	0	0	0	0	0	0	0	0	0	0	0	0	0	0	0	0	0	0	0	0	0	0	0	0	0	0	0	0	0	0	0	0	0	0	0	0	0	0	0	0	0	0	0	0
4930564B18Rik	NM_029230	0	0	0	0	0	0	0	0	0	0	0	0	0.39	0.13	0	0	0	0	0	0	0	0	0	0	0	0	0	0	0	0	0	0	0	0	0	0	0	0	0	0	0	0	0	0	0	0.14	0	0
4930564C03Rik	NM_029257	0	0	0.07	0	0.21	0.05	0	0	0	0.2	0.06	0.08	0.49	0	0.2	0.11	0.66	0	0.07	0	0.07	0.07	0	0	0	0	0	0	0	0	0.1	0.08	0	0	0	0	0.17	0.15	0	0.17	0.09	0.08	0.08	0.25	0.16	0.51	0.17	0
4930564D02Rik	NM_029228	0	0	0	0	0	0	0	0	0.14	0	0	0	0.23	0.31	0	0	0	0	0	0	0	0	0	0	0	0	0	0	0	0	0	0	0	0	0	0	0	0	0	0	0	0	0	0	0	0	0	0
4930565D16Rik	NR_040752	0	0	0	0	0	0	0	0	0	0	0	0	0	0	0	0	0	0.07	0	0	0	0	0	0	0	0	0	0	0	0	0	0	0	0	0	0	0.09	0	0	0	0	0	0	0	0	0	0	0
4930565N06Rik	NR_040476	0.26	0.09	0.07	0	0.38	0.12	0.38	0.18	0.29	0.03	0.14	0.32	0.46	0.63	0.15	0	0.14	0.13	0.2	0.11	0.3	0	0.08	0.44	0	1.13	0.5	0	0.37	0.09	0.14	0.76	0.68	0.14	0.47	0.19	0.64	0.61	0.55	0.5	0.08	0.22	0.04	0.29	0.15	0.15	0.16	0.28
4930567H12Rik	NR_015535	0.1	0	0	0	0	0	0.09	0.23	0	0	0.07	0.11	0.26	0	0	0	0	0	0.09	0	0.09	0	0	0	0.14	0	0.15	0.08	0	0.08	0	0.11	0	0	0	0	0.1	0.1	0	0	0	0	0.2	0	0	0	0.1	0
4930567H17Rik	NM_001033807	0	0	0.1	0	0	0	0	0	0	0	0	0	0.67	0	0	0	0	0.1	0	0	0	0	0	0	0	0	0	0	0	0	0	0	0	0	0	0	0	0	0	0	0	0	0	0	0	0	0	0
4930567J20Rik	NR_040576	0	0	0	0	0	0	0	0	0	0	0	0	0.12	0	0	0	0	0	0	0	0	0	0	0	0	0	0	0	0	0	0	0	0	0	0	0	0	0	0	0	0	0	0	0	0	0	0	0
4930567K20Rik	NR_046010	0	0.17	0	0	0.15	0	0	0.18	0	0.19	0.5	0.25	3.26	0.28	0	0	1.69	0.19	0.2	0	0	0.19	0	0.24	0.33	0	0	0	0	0	0	0.5	0	0	0	0	0	0	0	0	0.78	0	0	0.36	0	0.29	0.72	0.42
4930568D16Rik	NM_029463	0	0.35	0	0	0	0.05	0	0	0	0.06	0	0.08	0.07	0	0	0	0.21	0.13	0	0	0	0	0	0.08	0	0	0	0	0	0	0	0	0	0	0	0.15	0	0	0.08	0	0.08	0	0.04	0.24	0	0	0	0
4930568E12Rik	NR_040755	0	0	0.11	0	0.08	0	0	0.1	0	0	0.09	0	0.54	0	0.16	0	0.23	0	0.22	0	0	0.1	0	0	0.17	0	0.18	0	0	0	0	0.13	0	0	0	0	0.13	0	0	0	0.14	0	0.06	0	0	0	0	0
4930568G15Rik	NR_040480	0	0	0	0	0	0	0	0	0	0	0	0	0	0	0	0	0	0	0	0	0	0	0	0	0	0	0	0	0	0	0.06	0.1	0	0	0	0	0	0	0	0	0	0	0	0	0	0	0.1	0
4930570G19Rik	NR_040398,NR_040399,NR_040400	0.06	0.18	0.21	2.38	0.8	0.09	0.03	0.36	0.03	0.43	0.25	0.15	0.58	0.33	0.4	0.4	0.16	0.14	0.38	0.96	0.99	1.49	0.43	1.9	0.52	0.92	0.76	1.45	0.46	0.48	1.52	0.38	1.05	1.8	0.22	2.01	1.12	0.47	0.15	0.4	0.19	0.22	0.52	0.22	0.56	0.6	0.12	0.31
4930571K23Rik	NM_001145759	1.05	1.29	1.85	3	2.24	2.94	2.77	2.47	0.74	2.98	2.74	3.38	19.09	4.49	1.04	3.45	3.76	1.73	6.74	2.74	2.55	4.63	3.14	2.3	4.06	0.89	9	5.14	2.11	4.25	0.98	3.63	1.75	0.41	2.18	2.11	5.64	2.31	2.59	2.31	8.5	3.38	4.15	2.12	2.31	3.68	2.29	1.55
4930571O06Rik	NR_110476	0	0	0	0	0	0	0	0	0	0	0	0	0	0.3	0	0	0	0	0	0	0	0	0	0	0	0	0	0	0	0	0	0	0	0	0	0	0	0	0	0	0	0	0	0	0	0	0	0
4930572K03Rik	NR_045371	0	0	0	0	0	0	0	0.08	0	0	0.07	0	0.27	0	0.13	0	0	0	0.09	0	0	0	0	0	0	0	0	0	0	0	0	0	0	0	0	0	0	0	0	0	0	0	0	0	0	0	0	0
4930572O03Rik	NR_073011	0	0	0	0	0.16	0	0	0.1	0.06	0.38	0	0.17	2.14	0.3	0	0	0	0.27	0	0.12	0	0.14	0	0.04	0.22	0.22	0.05	0.31	0.52	0.08	0	0	0.41	0	0	0.07	0.8	0	0	0	0.22	0	0	0	0.23	0	0	0
4930572O13Rik	NR_045718	0	0	0	0	0	0	0	0	0	0.1	0.09	0	0	0.15	0	0	0	0	0	0	0	0	0.09	0	0	0	0	0	0	0	0	0	0	0	0	0	0	0	0	0	0	0	0.06	0	0	0	0	0
4930573O16Rik	NR_040620	0	0	0	0	0	0	0	0	0	0	0	0	0	0	0	0	0	0	0	0.73	0.87	3.01	0.52	0.53	0.72	0.27	1.15	1.88	1.22	0.62	0.15	0.28	0.46	0.3	0	2.69	0.26	0	0	0	0	0	0.13	0	0	0	0	0
4930577N17Rik	NR_073429	0.69	0.72	1.07	0.5	1.1	1.12	1.25	1.31	0.84	1.04	0.98	1.37	1.48	1.18	0.8	0.71	0.95	1.58	1.06	1.08	1.17	1.19	0.83	1.36	0.83	1.2	1.57	1.3	1.3	1.35	1.42	1.4	1.18	1.08	1.42	1.27	1.47	1.26	1.87	2.05	1.14	1.17	1.92	1.1	1.03	2.54	1.65	1.09
4930578C19Rik	NM_175228	0.1	0.23	0.09	0	0.17	0.17	0.24	0.28	0	0.22	0.04	0.11	0.18	0.91	0.26	0.07	0.19	0.17	0.68	0.05	0.09	0	0.53	0	0	0	0.38	0.04	0.12	0.08	0.06	0	0.14	0.25	0.16	0.05	0	0.1	0.22	0	0	0.05	0.03	0.32	0.05	0.07	0	0.19
4930578E11Rik	NR_045391	0.04	0	0	0	0.03	0	0	0.07	0	0	0	0.09	0.19	0	0.01	0.06	0	0	0	0	0	0.11	0	0	0.06	0	0	0	0	0.05	0	0	0	0	0	0	0	0	0	0.09	0	0	0.04	0	0	0	0	0
4930578I06Rik	NM_026359	0.09	0	0.08	0	0.18	0.3	0.25	0.29	0	0.62	0.2	0	5.07	0.22	0	0.26	0.85	0.23	0.81	0	0.16	0.31	0	0	0.51	0.18	0	0	0.22	0.52	0	0.48	0.33	0	0.43	0	0.29	0.17	0.58	0.4	0.71	0.24	0.23	0.14	0.27	0.7	0.48	0.5
4930578M01Rik	NR_045991	0	0.24	0	0	0.07	0.07	0	0.33	0.11	0.18	0.15	0	0.37	0.12	0	0.15	0.19	0.09	0.09	0	0.18	0.36	0	0.44	0	0.11	0.31	0.09	0.13	0.26	0.51	0.11	0.19	0.13	0	0.1	0	0.1	0	0	0	0	0	0.16	0	0	0	0.19
4930578N18Rik	NR_040575	0	0	0.18	0	0	0	0	0	0	0	0	0	0	0	0	0	0	0	0	0	0	0	0	0	0	0	0	0	0	0	0	0.21	0	0	0	0	0	0	0	0	0	0	0	0	0	0	0	0
4930579F01Rik	NM_001163385,NM_001163386	0	0	0	0	0.08	0.04	0.11	0.05	0	0.27	0	0	1.84	0	0	0.08	0.22	0.1	0.33	0.11	0	0.05	0	0.06	0	0	0.09	0	0	0.05	0	0.18	0.05	0	0	0.17	0.12	0.06	0.12	0.19	0.13	0.21	0.24	0.09	0.17	0.3	0.24	0.32
4930579G18Rik	NR_038053	0.13	0.43	0.34	0	0.17	0.12	0.42	0.45	0.14	0.27	0.23	0	0.44	0.45	0.34	0.65	0.11	0.05	0.79	0.06	0.33	0.03	0.22	0.07	0.09	0.13	0.35	0.16	0.23	0.05	0.3	0.27	0.23	0.47	0.08	0.13	0.13	0.12	0.14	0.26	0	0.17	0.14	0.1	0	0.25	0.27	0.23
4930579G24Rik	NM_029482	2.41	2.49	2.5	1.11	2.73	2.04	2.3	1.25	2.06	1.96	1.72	2.2	3.48	2.68	2.56	1.34	2.6	2.89	0.88	3.52	3.47	3.64	2.07	3.04	3.11	3.42	2.35	3.58	2.63	3.26	3.43	2.62	3.81	3.47	3	3.58	4.03	3.74	3.07	2.64	2.13	1.66	2.86	2.83	3.95	2.16	2.35	2.4
4930579K19Rik	NR_029444	2.96	4.01	3.54	3.81	3.4	4.01	3.6	4.54	3.11	2.82	3.27	2.68	3.94	3.68	2.19	2.89	5.07	3.53	5.2	3.45	2.4	3.18	4.35	4.22	2.83	3.03	3.36	4.2	2.96	4.06	2.9	2.85	2.64	3.04	2.66	2.41	3.08	2.96	2.42	2.77	3.88	4.14	3.24	1.4	1.55	3.13	2.92	1.93
4930581F22Rik	NR_029475	0.26	0.58	0.24	0.33	0.77	0.42	0.28	0.93	0.42	0.35	0.17	0.64	0.6	1.4	0.49	0.54	0.67	0.51	0.74	0.3	0.2	0.23	0.88	0.36	0.37	0.57	1.01	0.16	0.18	0.59	0.53	0.16	0.48	0.09	0.24	0.53	0.6	0.29	0.41	0.63	0.29	0.65	0.88	0.36	0.42	0.59	0.32	0.28
4930583K01Rik	NR_027879	0.32	0.08	0.2	0	0.15	0	0	0.17	0	0.36	0	0.12	0.1	0	0.14	0	0	0	0	0.11	0.37	0.09	0	0	0	0	0.16	0.09	0.26	0.18	0.39	0.69	0.1	0.78	0.17	0.32	0.11	0.52	0.23	0.12	0	0	0.05	0	0.43	0.28	0.23	0
4930583P06Rik	NR_040612	0	0	0	0	0	0	0	0	0	0	0	0	0	0	0	0	0	0	0	0	0	0	0	0	0	0	0	0	0	0	0	0	0.12	0	0	0	0.14	0	0	0.43	0	0	0	0	0	0	0	0
4930584F24Rik	NR_029445	0	0.12	0	0	0.21	0.05	0.07	0.06	0	0	0.29	0	1.39	0.19	0	0.45	0.51	0.2	0.21	0.08	0	0	0	0	0.11	0	0.12	0.13	0.1	0	0	0.17	0	0	0	0.23	0.17	0.08	0.08	0	0.17	0	0	0	0	0.4	0.08	0.14
4930590J08Rik	NM_198668	0	0.08	0.07	0	0.16	0.09	0.22	0.02	0.06	0.18	0.1	0.14	1.5	0.19	0	0.19	0.47	0.16	0.26	0	0.02	0.05	0	0.03	0.15	0.19	0.08	0.05	0.03	0.02	0.02	0.25	0.12	0	0	0	0.28	0.05	0.06	0.15	0.09	0	0.04	0.08	0.03	0.1	0	0.1
4930590L20Rik	NR_040604	0	0	0	0	0	0	0	0	0	0	0	0	0	0	0	0	0	0	0	0	0	0	0	0	0	0	0	0	0	0	0	0	0	0	0	0	0	0	0	0	0	0	0	0	0	0	0	0
4930591A17Rik	NM_026596	0	0	0	0	0	0	0	0	0	0.11	0.19	0	0.35	0	0.33	0	0	0	0.12	0.13	0	0	0	0	0	0	0	0	0	0	0	0	0	0	0	0	0	0	0	0.14	0	0	0	0	0.13	0	0	0
4930592A05Rik	NR_045070	0	0	0	0	0.13	0.06	0	0.08	0	0	0	0	0	0	0	0	0	0	0	0	0	0	0	0	0	0.1	0	0	0	0	0	0	0	0	0	0	0	0	0	0	0	0.15	0	0	0	0	0	0
4930592I03Rik	NR_033307	0	0	0	0	0.06	0.12	0	0.23	0.31	0	0.07	0	1.1	0.34	0	0.14	0	0.48	0.09	0.09	0	0	0	0.1	0.27	0	0	0	0	0	0	0.1	0.26	0	0	0	0.2	0	0	0	0.11	0.25	0	0	0	0	0	0
4930593A02Rik	NR_045167	0	0	0	0	0	0	0	0	0	0	0	0	0.09	0	0	0	0	0	0	0	0	0	0	0	0.14	0	0	0	0	0	0	0	0	0	0	0	0	0	0.11	0	0	0	0	0	0	0.26	0.21	0
4930593C16Rik	NR_040753	0	0	0	0	0	0	0	0	0	0	0	0	0	0.2	0	0	0	0.14	0.15	0.33	0	0.29	0	0	0	0	0	0	0	0	0	0	0	0	0	0	0.18	0	0	0	0	0	0	0	0	0	0.36	0
4930594C11Rik	NR_024017	0	0.03	0.03	0	0.04	0.02	0.03	0.05	0	0	0.05	0.03	0.32	0.08	0.06	0	0	0.08	0.06	0.03	0	0	0	0	0.05	0.1	0.1	0.03	0	0	0	0	0	0	0	0.07	0	0	0	0.11	0.04	0.14	0.07	0.1	0	0.04	0.04	0
4930595M18Rik	NM_173435	0	0	0	0	0	0	0	0	0	0	0	0	0.15	0	0	0	0	0	0.09	0	0	0	0	0	0	0	0.05	0	0	0	0.02	0	0	0	0	0	0	0	0	0.04	0.04	0	0.02	0.05	0.03	0	0	0
4930596D02Rik	NM_001033766	0.16	0	0	0	0	0.16	0	0.06	0	0	0.06	0	0.5	0	0	0	0	0.13	0.14	0.08	0	0	0	0	0.11	0	0	0	0	0.13	0	0	0.07	0	0	0	0	0.08	0	0.09	0.09	0	0.04	0	0.08	0	0.09	0.15
4930596I21Rik	NR_108103	0	0	0	0	0	0	0	0	0	0	0	0	0	0	0	0	0	0	0	0	0	0	0	0	0	0	0	0	0	0	0	0	0	0	0	0	0	0	0	0	0	0	0	0	0	0	0	0
4930597A21Rik	NR_126460	0	0	0	0	0	0.09	0	0	0	0.23	0	0	0	0	0	0	0	0.12	0	0	0	0	0	0	0	0	0	0	0	0	0	0	0	0	0	0	0	0	0	0	0	0	0	0	0	0	0	0
4930597G03Rik	NR_045736	0	0	0	0	0	0	0	0	0	0	0	0	0.07	0	0	0	0	0	0	0	0	0	0	0	0	0	0	0	0	0	0	0	0	0	0	0	0	0	0	0	0	0	0	0	0	0	0	0
4930598F16Rik	NR_040479	0	0	0	0	0	0	0	0	0	0.11	0	0	0	0	0	0	0	0	0	0	0	0	0	0	0	0	0.19	0	0	0	0	0	0.11	0	0	0	0	0	0	0	0	0	0	0	0	0	0	0
4930599N23Rik	NR_045813	0	0	0.1	0	0.08	0.07	0.1	0.18	0	0.09	0.08	0.59	0.3	0.14	0.3	0.16	0.54	0.09	0.1	0.79	0.31	0.38	0.15	0.36	0.16	0.11	0	0.49	0.13	0.19	0.27	0.48	0.22	0	0	0.79	0	0.11	0.13	0.38	0.75	0.57	0.42	0.72	0.11	0.29	0.37	0.2
4931402G19Rik	NR_040608	0	0	0	0	0.08	0.05	0.04	0.06	0	0	0.03	0	0.04	0.1	0	0	0	0.03	0.04	0	0.04	0	0	0	0	0.12	0.06	0	0	0	0.02	0	0.04	0	0	0	0.04	0.04	0.09	0.08	0	0	0	0.06	0	0	0.09	0.07
4931403E22Rik	NR_045306	0	0	0	0	0	0	0	0	0	0	0.11	0	0.26	0	0	0	0	0	0	0.14	0	0	0	0	0	0	0.87	0	0	0	0	0	0	0	0	0.43	0	0.14	0.15	0.63	0	0	0.07	0.23	0	0	0	0
4931403G20Rik	NR_038172,NR_038173	0	0	0.15	0	0.15	0.03	0.05	0.21	0.06	0	0.16	0.23	0.39	0.06	0	0	0.5	0.09	0.19	0	0	0	0	0.11	0.23	0.05	0.29	0.09	0	0.13	0.07	0	0	0	0	0.05	0.06	0.1	0.12	0.22	0.06	0.17	0.22	0.23	0.11	0.14	0.17	0
4931406B18Rik	NM_028737	0.02	0.27	0	0	0.02	0.12	0.06	0.07	0	0.08	0	0.1	0.2	0.03	0	0	0.21	0.02	0	0	0.04	0.04	0	0.05	0.06	0.03	0.07	0	0.05	0.04	0.22	0.07	0.1	0.06	0	0.05	0	0	0.02	0	0.03	0	0.05	0.04	0	0	0.03	0.08
4931406C07Rik	NM_001199484,NM_001199485,NM_133732	33.78	26.07	30.86	22.07	29.47	25.4	28.64	28.33	30.78	27.34	26.25	29.33	27.75	33.95	28.71	26.27	30.22	28.75	28.57	25.7	28.03	24.11	24.17	27.7	16.1	26.73	30.14	25.49	30.83	40.47	31.11	26.77	29.73	28.35	27.18	24.2	29.42	30.48	38.73	38.09	34.35	32.68	36.72	39.95	33.32	40.75	35.62	38.02
4931406H21Rik	NR_033492	0	0	0	0	0.02	0.02	0.04	0.02	0	0	0.05	0	0.02	0.03	0.03	0	0.02	0	0.04	0	0.02	0	0	0	0	0.05	0	0.04	0	0	0	0.05	0	0	0	0.02	0	0	0	0	0	0	0	0	0	0	0	0
4931406P16Rik	NM_172741	7.57	7.02	7.08	6.23	7.66	7.04	10.42	4.58	10.42	6.21	5.42	7.45	9.7	9.52	8.39	6.99	5.34	8.84	8.23	8.31	9.39	5.56	7.52	11.55	3.04	12.16	9.97	6.76	9	6.95	9.93	12.56	11.68	9.15	9.56	8.01	10.53	10.29	12.1	9.9	7.4	8.31	8.92	12.69	7.63	7.06	9.93	11.23
4931408C20Rik	NM_001033764	0.02	0.11	0.19	0	0.08	0.09	0.1	0.08	0.05	0.09	0.08	0.35	0.22	0.44	0.16	0.06	0.12	0.07	0.26	0	0	0	0.06	0	0	0	0.03	0	0.05	0.02	0	0	0.02	0	0	0	0	0.02	0	0	0	0	0.03	0	0	0	0.02	0
4931408D14Rik	NR_040298,NR_040299	0.03	0.16	0	0	0	0	0.11	0.05	0.39	0.58	0.02	0.03	0.36	0.42	0	0.3	0.75	0	0	0.12	0	0.03	0.25	0.13	0	0.12	0	0.03	0.65	1.58	0.16	0.09	0.51	0.14	0.18	0.15	0.19	0.39	0	0.26	0.03	0.37	0.11	0.28	0.06	0.15	0.03	0.27
4931409K22Rik	NM_177676,NR_033188	0.03	0	0	0	0.07	0.04	0.05	0.08	0.06	0.09	0.03	0	0.71	0	0	0	0	0.11	0.21	0.03	0.03	0.03	0	0	0.09	0	0.17	0	0.04	0.08	0	0.11	0.13	0	0.11	0	0	0.06	0.04	0.19	0.08	0.16	0.09	0.04	0.03	0.22	0.11	0.06
4931412M21	NR_110487	0	0	0	0.08	0	0	0	0	0	0	0	0	0	0	0	0	0	0.06	0	0	0	0	0.16	0	0	0	0.06	0	0	0	0	0	0	0	0	0.04	0	0	0	0	0.04	0	0	0	0.04	0	0.04	0
4931414P19Rik	NM_028890	1.67	2.87	2.33	0.45	1.98	2.18	1.97	2.6	2.31	2.2	1.34	1.72	1.86	3.43	1.86	2.56	2.3	1.79	2.01	3.85	3.96	3.21	3.37	4.22	1.8	2.73	3.63	3.58	3.08	2.98	3.46	2.48	2.21	2.87	3.18	2.94	3.19	2.72	2.07	2.11	1.94	2.97	2.18	2.8	1.49	2.05	2.35	1.68
4931417E11Rik	NM_025737	0.08	0.07	0.08	0.36	0.46	0.17	0.16	0.34	0.09	0.36	0.13	0.09	3.18	0.31	0.11	0.37	0.56	0.14	0.76	0.17	0	0	0	0.18	0.24	0.17	0	0	0.1	0	0	0.09	0	0	0	0	0.18	0	0.09	0.09	0.1	0.22	0.09	0	0.09	0.33	0	0.16
4931419H13Rik	NR_040593	0	0	0	0	0	0	0	0	0	0	0	0	0.17	0	0	0	0	0	0	0	0	0	0	0	0	0	0	0	0	0	0	0	0	0	0	0	0	0.09	0.1	0	0	0.15	0	0	0	0	0	0
4931420L22Rik	NR_040561	0	0	0	0	0	0	0	0	0	0	0	0	0	0	0	0	0	0	0	0	0	0	0	0	0	0	0	0	0	0	0	0	0.11	0	0	0	0.13	0	0	0	0	0	0	0	0	0	0	0
4931423N10Rik	NM_027635	0.15	0.08	0	0	0.13	0.1	0.18	0	0	0.04	0.07	0.05	1.27	0.18	0	0.14	0.37	0.17	0.22	0.05	0.04	0.13	0	0.05	0	0.15	0.22	0.04	0	0.16	0.06	0.11	0.27	0.24	0	0.1	0.53	0.33	0	0.17	0.22	0.03	0.05	0	0.2	0	0.16	0.27
4931428F04Rik	NM_001166394,NM_028888	1.5	1.27	1.79	1.54	2.17	1.88	2.17	1.85	2.14	1.32	1.44	2.12	3.24	2.38	1.47	1.11	1.09	1.81	2.1	1.84	1.9	1.16	1.58	1.92	0.65	1.66	2.52	1.04	1.49	1.23	1.32	1.97	1.7	1.65	2.19	1.23	1.88	1.8	2.98	2.72	2.63	3.1	2.81	2.73	2.48	2.6	3.02	3.54
4931428L18Rik	NR_033445	0	0	0.08	0	0	0.06	0.16	0	0.19	0.07	0.19	0.09	0.68	0.1	0.11	0.37	0.32	0.29	0.23	0	0	0.15	0	0.09	0	0	0.13	0	0.1	0	0	0.09	0	0	0	0	0	0	0.09	0.19	0.1	0.4	0	0	0.09	0	0	0.16
4931429I11Rik	NM_001081121	0.73	0.29	0.38	0.19	0.36	0.38	0.41	0.81	0.19	0.95	0.5	0.25	1.79	0.67	0.23	0.68	0.55	0.71	0.95	0.41	0.28	0.23	0.79	0.75	0.82	0.5	0.65	0.51	0.72	0.75	0.32	0.44	0.42	0.4	0.32	0.44	0.19	0.45	0.13	0.1	0.29	0.23	0.11	0.28	0.09	0.15	0.16	0.27
4931429L15Rik	NM_183104	0	0	0.04	0	0.09	0.06	0.08	0.07	0.1	0.11	0.03	0	1.03	0.11	0.17	0.06	0.34	0.04	0.12	0	0.08	0.08	0	0.1	0	0	0	0	0	0.04	0.03	0.19	0.08	0.05	0.07	0	0.19	0	0.05	0.25	0.05	0.05	0.12	0.14	0.14	0	0.05	0
4931429P17Rik	NR_038004	0	0	0	0.1	0	0	0	0	0	0	0	0	0	0	0	0	0	0	0	0.09	0.36	0.08	0.13	0.24	0.13	0.18	0.2	0.39	0.33	0.34	0.25	0.24	0.49	0.33	0.64	0.23	0.48	0.52	0.29	0.15	0.25	0.59	0.45	0.14	0.32	0.41	0.05	0.33
4931430N09Rik	NR_046053	0	0.03	0	0.36	0	0	0	0	0	0	0	0	0	0	0	0	0	0	0	0	0.04	0	0	0	0	0	0	0	0	0	0	0	0	0	0	0	0	0	0	0	0	0	0	0	0	0	0	0
4931431B13Rik	NR_045183	0	0	0	0	0	0	0	0	0	0	0	0	0	0	0	0	0	0	0	0	0	0	0	0	0	0	0	0	0	0	0	0	0	0	0	0	0	0	0	0	0	0	0	0	0	0	0	0
4931431C16Rik	NR_045807	3.53	4.12	4.17	2.99	3	3.26	3.64	3.15	4.09	2.59	3.11	3.81	3.67	4.6	5.33	2.76	2.61	3.61	3.67	1.83	2.44	1.13	1.45	3.22	0.41	1.42	3.53	1.31	2.3	1.42	2.14	2.39	1.79	3.05	3	1.92	2.75	2.47	5.74	5.08	2.68	4.69	4.66	5.66	2.18	3.66	4.78	5.73
4931431F19Rik	NM_027634	0	0.04	0	0	0.03	0.06	0.04	0	0	0.08	0.04	0	0.8	0.57	0	0	0.09	0.08	0.04	0	0	0	0.2	0	0.07	0.05	0	0.08	0.17	0	0	0.15	0.04	0	0	0.05	0.1	0.05	0	0	0.05	0	0	0	0.05	0	0.05	0
4931440F15Rik	NM_176829	0.15	0.19	0.25	0.06	0.38	0.24	0.28	0.19	0.26	0.03	0.33	0.22	1.46	0.19	0.2	0.17	0.22	0.38	0.28	0.81	0.96	0.23	0.41	0.87	0.6	0.62	0.8	0.78	0.66	0.55	0.67	0.85	0.49	1.25	0.9	0.63	0.74	0.71	0.59	0.66	0.52	0.87	0.48	0.64	0.72	0.38	0.32	0.17
4931440J10Rik	NR_045503	0	0	0	1.13	0.29	0	0.3	0.34	0.23	0.09	0.55	0.11	0.94	0.51	0.27	0	0.3	0.27	0.19	0	0.09	0	0	0	0	0	0	0.18	0.13	0.17	0	0	0.1	0	0	0	0	0.1	0.11	0.35	0.24	0	0.38	0.17	0	0.27	0.11	0
4931440P22Rik	NR_027955	1.37	1.21	1.62	2.12	1.28	0.77	1.05	2.19	1.19	1.39	1.53	1.05	0.91	1.47	1.6	1.2	2.04	1.36	1.94	0.64	0.56	0.8	1.45	0.84	0.48	0.54	1.09	1.1	0.6	0.89	0.51	0.68	1.07	0.78	0.31	0.84	0.57	0.8	1.54	2.15	1.53	2.33	2.26	1.24	1.04	1.79	1.75	0.72
4932411E22Rik	NM_172534	0.13	0.23	0.15	0	0.14	0.2	0.28	0.21	0.11	0.14	0.2	0.11	0.18	0.12	0.26	0.19	0.06	0.2	0.15	0.03	0.12	0	0	0	0	0	0.05	0.03	0	0.17	0.02	0.25	0.09	0.12	0.05	0.17	0.25	0.06	0	0	0.04	0	0.02	0.05	0.03	0	0	0
4932411N23Rik	NM_177705	0.02	0	0	0	0	0	0	0	0.03	0	0.02	0	0.24	0	0	0	0.12	0.02	0	0	0.04	0.02	0	0	0	0	0.07	0	0	0	0	0	0.02	0	0	0	0	0.02	0	0	0	0	0.03	0.08	0.05	0	0	0.05
4932412D23Rik	NR_040521,NR_040522	0	0.1	0	0	0.01	0	0	0.21	0	0	0	0	1.1	0	0	0	0	0	0.6	0.4	0	0	0	0.14	0	0	0	0.11	0.16	0	0	0.14	0	0	0.63	0	0.28	0	0.14	0	0.15	0	0	0	0	0	0.14	0.25
4932413F04Rik	NR_040764	0	0	0	0	0	0	0	0.03	0	0	0	0	0.06	0	0	0	0	0	0	0	0	0.06	0	0	0.05	0	0	0	0	0	0	0	0	0	0	0	0	0.03	0	0	0	0	0	0	0	0	0	0
4932414J04Rik	NR_028259	0	0.03	0.03	0	0.02	0.02	0.05	0.05	0.06	0.1	0.07	0	1.12	0.04	0.04	0.15	0.08	0.02	0.19	0	0	0	0	0.07	0.12	0	0.09	0.03	0.04	0.02	0	0.06	0.05	0	0.05	0	0.03	0	0.1	0.21	0.07	0.11	0.1	0.07	0.14	0.08	0.09	0.21
4932414N04Rik	NM_183113	0.02	0.02	0.02	0.16	0.05	0.02	0.11	0.14	0.08	0.08	0.04	0.05	1.55	0.32	0.03	0.07	0.09	0.06	0.38	0.02	0	0	0	0	0.03	0	0	0	0	0	0	0.13	0.09	0.06	0	0	0.05	0.02	0.03	0.25	0.25	0.12	0.09	0.08	0.02	0.26	0.11	0.36
4932415M13Rik	NR_073205	0	0.02	0.11	0	0.08	0.02	0.03	0	0.1	0.03	0.07	0.03	1.07	0.1	0.08	0.1	0.14	0	0.03	0	0.03	0.03	0	0.05	0.04	0.03	0.04	0.05	0	0	0.02	0.06	0.03	0.07	0	0	0.06	0.03	0.13	0.12	0.16	0.17	0.02	0.3	0.19	0.15	0.03	0.06
4932416H05Rik	NR_029452	1.39	1.3	1.21	1.26	1.34	1.01	1	2.08	1.52	1.88	1.01	1.35	2.09	1.67	0.7	1.39	2	0.86	2.19	1.96	1.49	1.42	1.31	1.4	1.19	1.09	2.45	1.7	1.69	1.18	1.47	1.54	1.38	1.45	1.53	1.67	1.34	1.21	2.77	2.11	1.57	2.24	2.04	1.85	1.6	1.8	1.9	2.44
4932416K20Rik	NM_001002775	0	0.1	0.03	0	0.03	0.03	0	0.02	0.03	0.13	0.06	0.11	0.85	0.03	0.07	0	0	0.04	0.09	0.03	0.02	0	0	0.03	0.07	0.05	0.11	0	0.06	0.04	0.02	0.08	0.07	0.03	0.04	0	0.03	0.05	0	0.06	0.1	0.09	0.08	0.08	0.03	0	0	0.14
4932418E24Rik	NM_177841	0.51	0.48	0.58	0.68	0.49	0.43	0.29	0.93	0.63	0.58	0.49	0.61	2.41	0.92	0.37	0.86	0.4	0.84	1.36	0.09	0.1	0	0	0.06	0.08	0	0.04	0.07	0.04	0.02	0.05	0.48	0.05	0.04	0	0.03	0.3	0.08	0.28	0.48	0.48	0.08	0.25	0.36	0.17	0.3	0.52	0.26
4932429P05Rik	NM_001085511	0	0	0	0	0	0	0	0.02	0.03	0	0	0	0.25	0	0	0	0.05	0.02	0.03	0	0.03	0	0	0	0	0	0	0	0	0	0	0.03	0	0	0	0	0	0.06	0	0	0.06	0.06	0.02	0	0	0	0.03	0
4932435O22Rik	NR_027643	0	0.02	0	0	0.02	0	0	0	0	0	0	0	0	0	0	0	0	0	0	0.42	0.37	0.34	0.54	0.56	0.22	0.85	0.43	0.27	0.61	0.35	0.73	0.53	0.86	0.55	0.46	0.29	0.37	0.46	0.09	0.03	0.12	0.07	0.26	0.12	0.11	0.24	0.14	0.1
4932438A13Rik	NM_172679	6.16	5.03	5.49	4.08	6.97	5.08	9.53	4.72	7.82	3.47	5.8	8.03	9.63	9.29	6.6	4.16	3.46	7.65	5.82	5.06	6.79	2.94	4.5	9.3	1.61	15.31	9.63	3.52	5.82	3.81	8.26	10.74	11.56	5.93	8.18	4.86	10.98	9.52	18.59	13.99	7.95	10.52	11.03	17.91	8.55	10.53	11.77	16.17
4932438H23Rik	NM_001163695,NM_028905	10.39	7.83	9.59	9.22	10.05	7.7	10.61	11.61	12.12	8.33	6.55	10	10.08	18.48	12.68	8.6	8.52	8.1	10.85	5.02	3.04	3.53	2.46	3.53	2.64	3.06	7.27	4.31	3.55	2.37	3.92	5.24	3.26	4.14	3.73	4.69	2.53	3.6	18.26	20.09	19.66	19.44	17.27	16.75	15.78	20.64	15.63	17.02
4932441J04Rik	NR_015588	0.78	0.8	0.36	0	0.36	0.44	0.12	0.52	0.44	0	0.19	0.14	0.47	0.16	0.34	0	0.12	0.11	0.35	0.52	0.11	0.68	0.64	0.42	0.37	0.54	0	0	0.48	0.22	0.56	0.71	0.36	0.96	0.42	0.13	0.28	0	0.14	0.29	0	0	0.13	1.04	0.13	0.34	0.14	0.24
4932443I19Rik	NM_001101519	0.48	0.28	0	0	0.08	0.08	0.11	0.58	0.13	0.31	0.27	0.13	0.11	0.15	0	0.17	0.46	0.31	0.87	0	0	0	0	0	0	0	0	0	0	0	0	0	0	0	0	0	0	0	0	0	0	0	0	0	0	0	0	0
4932702P03Rik	NR_045182	0	0	0	0	0	0	0	0	0	0.15	0	0	0	0	0	0	0	0	0	0.24	0	0	0	0	0	0	0	0	0	0	0	0.23	0	0	0	0	0.21	0	0.23	0	0	0	0	0	0	0	0	0
4933400A11Rik	NR_003635	0.07	0.06	0	0	0	0.25	0	0	0.17	0.19	0	0.08	0.87	0.18	0	0.22	0.14	0.13	0.14	0.08	0.07	0.19	0.69	0.08	0.21	0.15	0.67	0.06	0.09	0.06	0	0	0.14	0	0	0	0.16	0.15	0	0	0.08	0	0	0.12	0	0.39	0.08	0
4933400B14Rik	NR_045432	0	0	0	0	0	0	0	0	0	0	0	0	0	0	0	0	0	0	0	0	0	0	0	0	0	0	0	0	0	0	0	0	0	0	0	0	0	0	0	0	0	0	0	0	0	0	0	0
4933400C23Rik	NR_040770	0	0	0	0	0	0	0	0	0	0	0	0	0	0	0	0	0	0	0	0	0	0	0	0	0	0	0	0	0	0	0	0	0	0	0	0	0	0	0	0	0	0	0	0	0	0	0	0
4933400F21Rik	NR_015540	0	0	0	0	0.05	0.05	0.02	0.08	0	0.02	0.02	0	0.33	0.12	0	0	0.09	0.04	0.22	0	0	0	0	0	0	0.02	0.04	0	0	0.02	0.06	0.05	0.02	0	0	0	0	0	0	0	0.06	0	0.06	0.04	0.03	0.13	0	0
4933400L20Rik	NR_045730	0	0	0	0	0.07	0	0	0.09	0	0	0	0	0.97	0	0	0	0.1	0	0	0	0	0	0	0.23	0	0	0	0	0	0	0	0	0	0	0	0	0	0	0	0	0.12	0	0.17	0.34	0	0	0	0
4933401B06Rik	NR_033580	0	0	0	0	0	0.15	0	0	0	0.06	0	0	0.14	0.18	0	0	0.07	0	0	0	0	0	0	0	0	0	0	0	0	0	0.05	0.08	0.07	0	0	0	0.24	0	0	0.17	0	0	0	0	0	0	0	0
4933401D09Rik	NR_045431	0.07	0	0	0	0	0	0	0	0.08	0	0	0.07	0	0	0	0	0	0	0	0	0.12	0	0.05	0	0	0	0	0	0	0	0	0	0.06	0	0	0	0	0.07	0	0	0	0	0	0	0	0	0.13	0
4933401H06Rik	NR_040540	0	0	0	0	0	0.07	0	0.08	0	0	0	0.22	0.36	0	0	0	0	0.08	0.09	0	0	0	0	0	0	0	0	0	0	0	0	0	0	0	0	0	0	0	0	0.11	0	0	0	0.32	0	0.13	0.11	0.18
4933402C06Rik	NR_045504	0	0	0	0	0.06	0	0.09	0	0	0	0	0	0.08	0	0	0	0.09	0.08	0	0	0	0	0	0	0	0	0	0	0	0	0	0	0	0	0	0	0	0	0	0	0	0	0	0	0	0	0	0
4933402D24Rik	NM_001256158	0	0	0	0	0	0.03	0.05	0.04	0	0	0	0.06	0.32	0.12	0	0	0.15	0	0.05	0	0.05	0	0	0	0	0	0.08	0	0	0	0	0.06	0	0	0.16	0	0	0.2	0	0.06	0	0.57	0	0	0	0	0	0
4933402E13Rik	NM_001199996,NM_001199997	0	0	0.04	0	0.03	0	0.04	0	0.05	0	0.14	0	1.06	0.23	0	0	0	0	0.08	0.09	0	0.04	0	0.1	0.13	0.09	0.07	0	0.12	0.08	0	0	0	0.06	0	0	0.1	0.14	0.05	0	0	0	0	0.07	0.19	0	0.1	0.17
4933402J07Rik	NM_177901	0.18	0.42	0.33	2.35	0.81	1.02	0.94	0.58	0.4	1.79	0.88	1.08	8.78	0.88	0.35	2.23	1.8	1.08	2.37	0.09	0.72	0.86	0.26	0.2	1.93	0.37	2.45	1.09	0.56	1.28	0.39	0.78	0.91	0.22	0.14	0.18	2.13	0.79	0.29	0.51	2.05	2.29	0.71	0.43	0.09	1.06	0.78	1.18
4933402J10Rik	NR_040682,NR_040683	0	0	0.09	0	0	0.19	0.07	0.08	0.44	0	0.15	0	2.73	0.36	0	0.14	0.46	0.27	0.71	0	0	0.08	0	0	0.28	0	0	0.17	0.24	0	0	0.25	0	0	0	0	0.25	0.23	0.11	0.11	0.33	0	0	0	0.16	0.13	0	0.36
4933402J15Rik	NR_046059	0	0	0	0	0	0	0	0	0	0	0	0	0	0	0	0	0	0	0	0	0	0	0	0	0	0	0	0	0	0	0	0	0	0	0	0	0	0	0	0	0	0	0	0	0	0	0	0
4933402N03Rik	NM_173409	0	0	0	0	0.05	0.05	0.22	0.06	0	0	0.06	0	0.5	0.19	0	0.11	0	0	0	0	0	0	0	0	0	0	0	0.2	0	0	0	0.09	0.07	0	0	0	0.08	0	0	0	0	0	0	0	0	0	0	0
4933402N22Rik	NM_001177510	0	0	0	0	0.22	0	0.01	0.34	0	0	0.59	0	3.46	1	0	0.32	0.79	0	0	0	0	0	0	0	0	0	0	0	0	0	0	0	0.31	0	0	0	0.75	0	0.18	0.18	0.09	0.49	0.22	0	0	0.35	0	0.21
4933402P03Rik	NM_175368	0.23	0.87	0.36	0.73	1.12	1.11	0.63	1.08	0.56	1.98	0.67	1.94	12.78	1.22	0.73	1.79	2.29	1.43	1.78	0.4	0.7	0.97	0.44	0.24	1.11	0.29	1.77	0.58	0.55	1.5	0.28	1.63	0.98	0.07	0.8	0.45	1.75	0.87	0.43	0.57	1.26	1.4	0.7	0.54	0.11	0.37	0.85	1.57
4933403O08Rik	NM_001177389	0	0	0	0	0	0	0	0.05	0	0	0.04	0	0	0	0	0	0	0.05	0	0	0	0	0	0	0	0	0	0	0	0	0	0.06	0	0	0	0	0	0	0	0	0	0	0	0	0	0	0	0
4933404G15Rik	NR_045920	0	0.13	0	0	0.04	0.04	0	0	0	0.25	0.04	0	0.26	0	0	0	0	0	0.21	0	0	0	0	0	0.24	0	0	0	0	0	0	0.12	0.05	0	0	0	0	0.06	0	0.06	0	0.06	0	0	0.06	0	0.12	0.11
4933404K08Rik	NR_046038	0	0.1	0.06	0	0.04	0	0.06	0	0.07	0	0	0	0.17	0.08	0	0	0	0	0.06	0	0	0	0	0	0	0	0	0.16	0	0	0	0	0.06	0	0	0	0	0	0	0	0	0	0	0	0	0	0	0.12
4933404O12Rik	NR_015555	0.38	0.86	0.52	0.2	0.49	0.44	0.63	0.69	0.62	0.33	0.59	0.55	0.96	0.54	0.44	0.72	0.42	0.53	0.36	0.55	0.48	0.52	0.46	0.24	0.28	0.57	0.49	0.46	0.58	0.37	0.43	0.51	0.6	0.41	0.64	0.32	0.46	0.51	0.52	0.8	0.35	0.65	0.62	0.32	0.56	0.53	0.6	0.67
4933405D12Rik	NR_046036	0	0.09	0.35	0	0.42	0.25	0	0.2	0.14	0.74	0.46	0.13	0.44	0	0	0	0.12	0.42	0	0.61	0.11	0.31	0.52	0.79	0.18	0.13	0	0.32	0.15	0.71	0.3	0.54	0.34	0	0.2	0.61	0.26	0.12	2.39	1.69	1.4	0.58	1.33	2.94	0.25	1.6	0.53	1.37
4933405E24Rik	NR_045506	0	0	0	0	0	0	0	0	0	0	0	0.09	0	0	0	0	0	0	0.08	0	0	0	0	0	0	0	0	0	0	0	0	0	0	0	0	0	0	0	0	0	0	0	0	0	0	0	0	0
4933405L10Rik	NM_027655	0.16	0.06	0.15	0	0.11	0.11	0.08	0.26	0.09	0.28	0.12	0.18	2.87	0.2	0.96	0.12	0.08	0.07	0.37	0	0	0	0	0	0	0.17	0.12	0.21	0	0	0.1	0.18	0.3	0	0.13	0	0.53	0.16	0.18	0.18	0	0.17	0	0.26	0	0.11	0.35	0.15
4933405O20Rik	NM_172901	0	0.21	0.06	0	0.09	0	0	0.05	0	0.12	0.05	0	1.28	0	0	0	0.19	0	0.37	0	0	0	0	0	0.1	0.07	0	0.06	0	0.11	0	0.44	0.06	0	0	0	0.29	0.13	0.15	0.23	0.31	0.14	0.18	0.22	0.07	0.72	0.22	0.25
4933406C10Rik	NR_044986	0.06	0.3	0.15	0.24	0.5	0.11	0.52	0.44	0.62	0	0.25	0.36	0.4	0.27	0.07	0.24	0.26	0.42	0.45	0.39	0.05	0.1	0.24	0.18	0.24	0.34	0.25	0.19	0.34	0.09	0.24	0.12	0.36	0.14	0.18	0.17	0.3	0.16	0.36	0.31	0.63	0.29	0.41	0.18	0.11	0.15	0.24	0.41
4933406D12Rik	NR_040502	0	0	0	0	0	0	0	0	0	0	0	0	0	0	0	0	0	0	0	0	0	0	0	0	0	0	0	0	0	0	0	0	0	0	0	0	0	0	0	0	0	0	0	0	0	0	0	0
4933406F09Rik	NR_015568	0.28	0.33	0.46	1.84	0.24	0.47	0.93	0.57	0.31	0.79	1.11	0.38	10.79	0.77	0.46	0.41	1.41	0.48	1.28	0.28	0.13	0.43	0	0	0.3	0.07	1.06	0.06	0.09	0.06	0.13	0.99	0.26	0.09	0.11	0.07	1.06	0.14	0.08	0.32	1.04	0.9	0.18	0.56	0.07	1.11	0.91	0.26
4933406G16Rik	NR_046037	0	0	0	0	0	0	0.06	0	0	0	0	0	0.17	0	0	0	0	0	0.12	0	0.06	0	0	0	0	0	0	0	0	0	0	0	0	0	0	0	0	0	0	0	0.07	0	0	0	0	0.34	0.07	0.12
4933406I18Rik	NR_029437,NR_029438	0.31	0.16	0.38	0	0.14	0	0	0	0	0.27	0.07	0.34	0.24	0.13	0.13	0.28	0.08	0.25	0.25	0.1	0	0	0	0.33	0	0.18	0.13	0.16	0.38	0.15	0.06	0	0	0	0	0.27	0.11	0	0	0	0	0	0.05	0	0.36	0.12	0.22	0
4933406J08Rik	NM_028914	0	0	0	0	0	0	0.04	0	0	0	0	0	0.19	0	0	0	0	0	0	0	0.04	0.04	0	0	0.06	0.3	0	0	0.05	0	0.05	0.14	0.19	0	0	0	0	0.08	0	0	0.05	0	0	0	0	0	0	0
4933406J10Rik	NR_046004	0	0	0	0	0	0	0	0	0	0	0	0	0	0	0	0	0	0	0	0	0	0	0	0.1	0	0	0	0	0	0	0	0	0	0	0	0	0	0	0	0.11	0	0	0	0	0	0	0.2	0
4933406K04Rik	NR_015512	0.14	0.05	0	0	0.05	0	0.06	0.11	0	0	0	0	0.73	0	0	0.39	0.06	0.06	0.31	0.07	0	0	0	0	0	0	0.1	0.06	0	0	0	0.07	0	0	0	0	0.22	0	0	0	0	0.07	0	0	0	0	0	0
4933406M09Rik	NM_173771	0.05	0.12	0.14	0	0.04	0.07	0.05	0.12	0.11	0.04	0.04	0.11	0.41	0.19	0	0	0.05	0	0	0	0	0	0	0	0	0	0	0	0.06	0	0	0.05	0.05	0	0	0	0	0	0.11	0	0.06	0	0.05	0	0	0.13	0	0
4933407E24Rik	NR_045819	0	0	0	0	0.07	0	0	0	0	0.12	0.04	0.05	0.3	0	0	0	0.14	0	0.04	0.05	0.04	0.04	0	0.05	0	0	0	0	0	0	0	0	0	0.12	0	0	0	0	0	0	0	0	0.03	0	0.1	0	0	0
4933407G14Rik	NR_045841	0	0	0	0	0	0	0	0	0	0	0	0	0	0	0	0	0	0	0	0	0	0	0	0	0.1	0	0	0.19	0.09	0	0	0	0	0	0	0.07	0.08	0	0	0	0	0	0	0	0	0	0	0
4933407I05Rik	NR_040731	0	0	0	0	0	0	0.11	0	0	0	0	0	0.32	0	0	0.17	0	0.1	0.21	0	0	0	0	0	0	0.12	0	0.1	0	0	0	0	0	0	0	0	0	0	0	0	0	0	0	0.19	0	0.15	0	0
4933407K13Rik	NR_029443	1.72	1.84	1.39	0.63	2.03	1.97	2.53	2.3	2.38	1.72	1.32	2.64	2.97	3.76	1.45	2.11	1.4	2.19	2.87	1.44	2.22	1.16	1.8	1.94	0.89	2.37	6.11	1.17	1.6	1.43	2.06	2.54	2.12	1.47	2.21	1.92	1.64	2.32	6.06	6.26	4.32	6.7	5.02	7.44	4.45	7.58	4.92	7.17
4933407L21Rik	NR_037692	0.24	0.37	0	0	0.28	0.37	0.45	0.45	0.18	0	0.36	0.52	0.43	0.29	0.63	0.12	0.15	0	1.31	0	0.07	0.14	0	0.26	0	0.33	0	0	0.2	0	0.05	0.09	0.15	0	0.25	0.08	0.09	0.08	0	0.27	0.09	0	0.04	0	0	0	0	0
4933408B17Rik	NM_177773	0.11	0.15	0.28	0	0.24	0.22	0.32	0.18	0.08	0.13	0.17	0.25	0.61	0.46	0.05	0.22	0.4	0.45	0.17	0.15	0.1	0.13	0.32	0.25	0.16	0.77	0.17	0.07	0.28	0.29	0.37	0.49	0.62	0.09	0.3	0.5	0.12	0.4	0.33	0.17	0.04	0.08	0.34	0.18	0.27	0.1	0	0.35
4933408J17Rik	NR_045810	0	0	0	0	0.03	0	0.05	0	0	0.08	0.04	0	0.04	0	0	0	0	0	0	0	0	0	0	0	0.07	0	0.07	0	0	0	0.03	0	0	0	0	0.1	0.1	0	0.05	0	0	0	0	0	0	0	0.11	0
4933408N05Rik	NR_045831	0.12	0	0	0	0	0	0.05	0	0.06	0.15	0	0.12	0.1	0.07	0.11	0	0.05	0	0.16	0	0	0.09	0	0	0.08	0.12	0	0.05	0	0	0.04	0	0.05	0.07	0	0	0	0	0.19	0.13	0	0	0.09	0.09	0	0	0.12	0
4933409G03Rik	NM_177651	0	0.16	0.06	0	0.19	0.18	0.19	0.22	0.08	0.23	0.1	0	4.59	0.99	0.09	0.4	0.45	0.23	0.12	0.07	0	0.3	0	0.15	0.1	0.14	0.61	0.18	0.08	0.23	0.08	0.15	0.38	0.08	0	0	0.88	0.13	0.07	0.08	0.15	0.4	0.21	0.22	0.07	0.27	0.15	0.51
4933409K07Rik	NR_033123,NR_033123_chr4:42031295_42055130	36.3	23.72	27.33	30.51	33.86	32.4	32.2	27.84	28.26	27.29	25.47	32.45	33.55	28.96	28.1	29.6	22.25	36.08	27.19	42.05	36.68	34.56	32.62	39.87	31.19	36.25	31.69	46.82	34.04	33.38	36.36	36.76	35.75	47.95	30.95	28.83	46.76	36.15	48.52	51.11	30.32	35.16	49	36.65	34.85	36.93	54.01	41.57
4933411E08Rik	NR_045342	0.05	0.21	0.2	0	0.07	0.03	0	0.05	0.24	0.14	0.11	0.14	0.43	0.19	0.14	0.08	0.16	0	0.1	0.11	0.06	0.37	0	0	0.08	0	0.12	0.05	0.26	0	0.2	0	0	0.07	0.08	0	0.32	0.1	0	0	0.06	0.08	0.05	0.08	0	0.07	0	0
4933411G06Rik	NR_045158	0	0	0	0	0	0	0	0.07	0	0	0	0.2	0.98	0	0	0	0	0	0.41	0	0	0	0	0	0.13	0	0	0	0	0.08	0	0.1	0	0	0	0	0.1	0.09	0	0	0.1	0	0.09	0	0.09	0.71	0.29	0.17
4933411G11Rik	NM_177880	0.08	0	0	0	0	0.03	0.04	0.07	0	0.11	0	0.04	0.67	0.05	0	0	0.16	0.05	0.04	0	0	0	0	0	0	0	0	0	0	0	0	0	0.04	0	0	0	0	0	0	0.09	0	0	0.02	0	0	0	0	0
4933411K16Rik	NM_025752	1.63	3.47	1.98	6.22	3.13	3.69	4.03	3.7	2.25	5.82	3.64	5.63	41.77	7.65	2.29	7.17	7.22	4.26	7.25	1.64	2.07	3.49	2.08	2.11	5.62	1.46	6.06	3.21	2.81	4.12	1.12	5.96	2.5	1.36	1.76	1.97	5.93	2.47	1.34	3.58	4.33	2.65	1.49	1.66	1.6	1.88	1.75	2.67
4933412E12Rik	NR_038025,NR_038026	12.55	10.43	13.72	8.76	9.07	13.05	10.06	10.89	12.19	9.95	9.33	10.02	13.01	5.9	6.13	9.43	7.3	12.47	14.45	0.85	1.07	0.78	1.54	0.97	1.28	1.04	1.18	0.99	0.59	1.51	0.88	0.8	1.32	0.52	1.11	1.33	1.35	1.17	3.2	2.03	4.2	3.09	3.04	1.72	2.22	2.05	4.08	2.69
4933412E24Rik	NM_027668	0	0	0	0	0	0	0.1	0.08	0	0.13	0.04	0	0.55	0	0	0	0	0	0	0	0	0	0	0	0	0.05	0	0	0	0	0	0	0.05	0	0	0	0.11	0.05	0	0	0	0	0	0	0	0	0	0
4933412O06Rik	NR_045507	0	0	0	0	0	0	0	0	0	0	0	0	0	0	0	0	0	0	0	0	0	0	0	0	0	0	0	0	0	0	0	0	0	0	0	0	0	0	0	0	0	0	0	0	0	0	0	0
4933413G19Rik	NM_027697	0	0.13	0	0	0.06	0.06	0.16	0	0	0.07	0	0.09	0.61	0.1	0	0	0	0	0.23	0	0.15	0.07	0	0	0.12	0.17	0.25	0	0.31	0.07	0	0.09	0.16	0	0	0.08	0.36	0	0.18	0	0	0	0.13	0	0	0.11	0	0
4933413J09Rik	NR_038005	0.4	0.04	0.41	0.23	1.18	0.57	0.93	0.11	0.29	0.16	0.27	0.68	1.06	0.19	0.58	0.04	0.1	0.91	0.14	0.29	0.19	0.16	0.41	0.74	0.26	3.16	0.12	0.18	0.39	0.29	1.09	0.82	2.23	0.29	0.42	0.4	0.96	0.61	0.54	0.74	0.21	0.59	0.4	0.13	0.43	0.59	0.57	0.44
4933413L06Rik	NR_045508	0	0	0	0	0	0	0	0.08	0	0	0	0	0	0	0	0	0	0	0	0	0	0	0	0	0.14	0	0	0	0	0	0	0	0	0	0	0	0	0	0	0	0	0	0	0	0	0	0	0
4933415F23Rik	NM_025746	0.51	0.28	0.89	1.1	1.4	0.8	1.24	1.1	0.51	2.36	1.78	1.32	14.57	2.21	0.4	1.69	1.45	1.12	2.53	0.36	0.94	1.23	1.12	1.1	1.65	0.57	3.35	1.63	0.69	1.23	0.28	1.8	0.65	0.25	0.48	0.62	1.74	0.79	0.61	1.72	3.2	1.59	1.91	1.21	0.47	1.67	1.8	1.32
4933416C03Rik	NM_001161855	0.04	0.25	0.26	0.09	0.38	0.16	0.3	0.16	0.18	0.51	0.51	0.3	7.45	0.63	0.1	0.58	0.76	0.3	0.43	0.04	0	0.1	0	0.13	0.06	0	0.06	0.07	0	0	0.05	0.13	0.18	0	0.13	0	0.17	0.23	0.3	0.27	0.54	0.15	0.27	0.13	0.12	0.37	0.17	0.37
4933416E03Rik	NR_040498	0	0	0	0	0	0	0	0	0	0	0	0	0	0	0	0	0	0	0	0	0	0	0	0	0	0	0	0	0	0	0	0	0	0	0	0	0	0	0	0	0	0	0	0	0	0	0	0
4933416I08Rik	NM_027700	0	0	0	0	0	0	0	0	0	0	0	0	0.26	0.09	0	0	0.07	0	0	0	0	0	0	0.08	0	0.07	0	0	0	0	0	0	0	0	0	0	0	0	0	0.24	0	0	0	0.12	0.07	0	0	0.14
4933416M06Rik	NR_045846	0	0	0	0	0.1	0.05	0	0	0.16	0.37	0	0.08	0.06	0.26	0	0.21	0	0.36	0.13	0	0.19	0.06	0	0	0	0.07	0.11	0	0	0	0	0	0	0	0	0	0.15	0.28	0	0.24	0.24	0	0	0.11	0	0	0.15	0.4
4933416M07Rik	NR_045840	0.24	0.06	0.15	0	0.06	0.1	0.08	0.19	0.27	0.19	0	0	0.71	0.19	0	0	0.56	0.21	0.29	0.47	0.07	0.21	0	0.09	0.11	0.4	0.93	0	0.1	0.18	0.2	0.44	0.15	0	0.26	0.08	0.33	0.31	0.58	0.29	0.64	0.66	0.8	0.51	0.43	0.35	0.9	0.15
4933417A18Rik	NM_025750	0	0	0.08	1.53	0.43	0.23	0.08	0.21	0.1	0.38	0.73	0	1.99	0.32	0.58	0	0.42	0	0.72	0.09	0	0.15	0.31	0.1	0.63	0.18	0.67	0.08	0.11	0.15	0	0.67	0.08	0	0	0	0.28	0.35	0.1	0.2	0.6	0.28	0.14	0	0	0.46	0.19	0.66
4933417D19Rik	NR_045849	0.22	0.4	0.83	0.81	0.87	0.64	0.49	0.66	0.66	0.26	0.61	0.57	1.2	1.18	0.39	1.08	0.78	0.19	0.54	0.15	0.46	0.32	0.32	0.24	0.53	0.76	0.22	0.19	0.37	0.5	0.09	0.16	0.48	0.64	0	0.23	0.56	0	0.65	0.67	0.51	0.36	0.31	0.71	0.23	0.1	0.48	0.28
4933417E11Rik	NR_040454	0.17	0.2	0.16	0.55	0.52	0.06	0.16	0.14	0.19	0.07	0.19	0.09	0.15	0	0.22	0.37	0	0.07	0.08	0	0.07	0	0	0	0	0	0	0	0	0	0	0	0.08	0	0	0	0	0	0	0.09	0	0	0	0	0	0	0	0
4933417G07Rik	NR_033592	0	0.07	0	0	0	0	0	0	0	0.08	0	0	0.09	0	0	0	0	0	0	0	0	0	0	0	0	0	0	0	0	0	0	0.1	0	0	0	0	0	0.09	0	0	0	0	0	0	0	0	0	0.18
4933417O13Rik	NR_045842	0.06	0.09	0	0	0	0.12	0	0	0	0.05	0.04	0	0.53	0.07	0	0.17	0.06	0.1	0.22	0	0.16	0	0	0	0	0	0.09	0	0	0	0	0	0.05	0.07	0	0	0	0.06	0	0.07	0	0	0	0.38	0.06	0	0.13	0
4933421I07Rik	NM_027702	0	0	0.06	0	0	0	0	0	0	0	0	0	0.28	0	0	0	0	0.06	0.06	0	0	0	0	0	0	0.07	0	0	0	0	0	0	0	0	0	0	0.07	0	0	0.07	0	0	0	0	0	0	0	0
4933421O10Rik	NR_036602	7.2	6.49	6.49	7.26	7.04	6.34	7.9	8.32	7.33	5.61	5.89	5.7	6.75	8.38	7.16	6.58	6.21	6.37	7.41	10.57	11.66	7.75	7.35	11.72	5.14	10.71	9.52	9.95	9.31	7.02	11.35	7.93	9.68	11.07	11.38	8.22	11.84	9.27	9.32	9.38	7.7	6.57	9.42	10.1	7.3	7.22	9.38	9.51
4933422A05Rik	NR_040715	0.13	0.21	0.19	0	0.05	0.13	0	0.11	0.07	0.06	0.2	0.07	0.72	0	0.35	0.29	0.06	0.06	0	0	0	0.06	0.19	0	0.1	0.21	0.1	0	0.17	0	0	0	0.12	0.08	0	0.07	0.07	0.07	0.51	0.45	0.76	0.75	0.56	0.21	0.76	0.79	0.43	0.5
4933422H20Rik	NM_001033775	0	0.04	0.04	0	0.1	0.25	0.26	0.19	0.1	0.4	0.21	0.2	2.38	0.45	0	0.14	0.66	0.28	0.47	0	0.04	0.04	0	0	0.4	0	0	0.04	0	0.12	0	0.7	0.26	0	0	0	0.9	0.32	0.1	0.21	0.16	0.22	0	0.22	0.14	0.12	0.1	0.35
4933424G05Rik	NR_045372	0.21	0.04	0.05	0	0	0.03	0.15	0	0	0.04	0.08	0.06	0	0.06	0.2	0	0	0.26	0.05	0.05	0	0	0	0	0.07	0	0	0.04	0.06	0.13	0.06	0.06	0	0	0	0	0	0	0.06	0.12	0.06	0	0	0	0.05	0.14	0.11	0
4933424G06Rik	NR_040290	0	0.06	0	0	0.22	0	0.15	0.13	0	0.07	0.06	0.09	1.47	0.2	0.11	0	0	0.07	0.07	0	0.07	0	0	0	0.23	0.08	0	0	0	0	0.15	0.26	0.07	0	0.13	0	0.35	0.16	0	0.09	0	0.13	0	0	0.17	0.21	0.09	0.15
4933425B07Rik	NR_046460	0	0	0	0	0	0	0	0	0	0	0	0	0	0	0	0	0	0	0	0	0	0	0	0	0	0	0	0	0	0	0	0	0	0	0	0	0	0	0	0	0	0	0.05	0.07	0	0	0	0
4933425L06Rik	NM_025751	0.08	0	0	0	0.03	0	0.04	0.03	0.09	0	0	0	0.45	0.05	0	0.12	0.12	0.04	0.11	0	0	0	0	0.04	0	0	0	0	0	0	0	0	0	0	0	0	0	0	0	0.05	0.05	0	0	0.07	0	0	0	0
4933427D06Rik	NM_175017	0	0	0	0	0	0	0	0	0	0	0	0	0.09	0	0	0	0	0	0	0	0	0	0	0	0	0	0	0	0	0	0	0	0	0	0	0.03	0	0.03	0	0	0	0	0	0	0	0	0	0
4933427D14Rik	NM_028963	3.82	5.01	2.93	4.07	4.46	3.89	4.81	4	4.63	3.75	3.37	4.74	5.97	4.99	3.59	3.39	2.76	4.66	4.95	3.49	3.47	3.51	3.75	4.16	1.79	5.53	6.3	3.33	3.27	3.08	3.98	5.07	5.21	3.68	3.69	2.95	5.12	3.98	11.7	10.17	7.94	9.57	9.23	10.52	8.23	12.19	8.74	11.52
4933427E11Rik	NR_033197	0	1.05	0.28	0.16	0.73	0.2	0.21	0.97	0.5	0.72	0.56	0.49	1.97	1.19	0.3	1.2	0.57	0.45	0.68	0.84	1	0.26	0.37	0.98	0.86	0.46	0.57	0.46	0.93	0.57	0.74	0.57	0.62	1.02	1.44	0.38	0.65	0.44	0.33	0.17	0.26	0.36	0.59	0.24	0.08	0.4	0.08	0.84
4933427E13Rik	NR_045853	0.06	0	0	0	0	0	0	0	0	0	0	0	0	0	0	0	0	0.05	0	0	0	0	0	0	0	0	0	0	0	0	0	0	0	0.08	0	0.06	0	0	0	0	0	0	0	0	0	0	0	0
4933427G17Rik	NM_028955	0.05	0	0.22	0	0.07	0.13	0.04	0.38	0.05	0.21	0.14	0.26	1.24	0.17	0.19	0.14	0.18	0.2	0.04	1.4	1.7	0.58	0.51	1.76	0.81	2.43	0.79	1.08	1.18	1.48	1.53	1.29	1.62	1.36	1.44	1.16	1.08	1.16	1.72	2.37	1.35	1.88	1.18	1.45	1.13	2.02	1.29	2.5
4933427I22Rik	NR_045159,NR_045160	0	0	0.06	0	0	0	0	0.05	0	0	0	0	0	0	0	0	0	0	0	0	0	0	0	0	0	0	0	0	0	0	0	0	0	0	0	0	0	0	0	0	0	0	0	0	0	0	0	0
4933428C19Rik	NR_040644	0	0	0	0	0	0	0	0	0	0	0	0	0.1	0	0	0	0	0	0	0	0	0	0	0	0	0	0	0	0	0	0	0	0	0	0	0	0	0	0	0	0	0	0	0	0	0	0	0
4933428G20Rik	NM_001289118	0	0	0.06	0	0.23	0.17	0.12	0.16	0.07	0.17	0.11	0.07	0.89	0.24	0.25	0.09	0.06	0.06	0.29	0.07	0	0	0	0	0	0	0.1	0.06	0	0	0.04	0	0.12	0	0	0.07	0.15	0	0	0	0.23	0	0	0	0	0.08	0	0
4933429K18Rik	NR_045307	0	0	0.08	0	0.06	0.06	0	0.07	0.1	0	0	0	0.08	0	0	0	0	0.08	0	0	0	0	0	0	0	0.09	0.14	0	0	0	0	0	0	0	0	0	0	0	0.3	0.1	0	0	0.05	0.29	0.37	0	0.2	0
4933429O19Rik	NR_033783	0	0	0	0	0	0	0	0	0	0	0	0	0.25	0	0	0	0.11	0	0.05	0	0	0.05	0	0	0	0	0	0	0	0	0	0	0.05	0	0	0	0	0	0	0	0	0	0.03	0	0	0	0	0.21
4933430H16Rik	NR_045855	0	0	0.06	0	0	0	0	0	0	0	0	0	0	0.08	0.17	0	0	0	0	0	0	0	0	0	0	0	0	0	0	0	0	0.07	0	0	0	0	0.07	0	0	0	0	0	0	0	0	0	0	0
4933430I17Rik	NM_177607	0.36	0.31	0.14	0.22	0.63	0.53	0.62	0.61	0.62	0.35	0.45	0.44	0.95	0.49	0.26	0.22	0.24	0.52	0.74	0.46	0.54	0.35	0.25	0.6	0.21	0.82	0.3	0.48	0.56	0.8	0.72	0.87	0.7	0.13	0.72	0.51	0.82	0.39	1.21	0.68	1.03	0.62	0.56	0.81	0.67	0.93	0.6	1.13
4933430M04Rik	NR_045857	0	0	0	0	0	0	0	0	0	0	0	0	0	0	0	0	0	0.11	0	0	0	0	0	0	0	0	0	0	0	0	0	0	0	0	0	0	0	0	0.14	0	0	0	0	0	0	0	0	0
4933430N04Rik	NR_045854	0	0	0	0	0	0	0	0	0	0	0	0	0	0	0	0	0	0.07	0	0	0	0	0	0	0	0	0	0	0	0	0	0	0	0	0	0	0	0	0	0	0.09	0	0	0	0	0	0	0
4933431E20Rik	NR_015459	6.39	5.76	5.9	4.03	7.55	6.25	7.45	6.59	5.93	4.56	4.91	5.32	6.58	8.43	6.82	5.97	5.04	6.24	7.49	8.48	8.9	4.72	4.61	7.77	4.19	8.35	9.36	6.83	8.9	7.13	8.06	7.16	7.51	8.63	8.02	7.9	10.36	7.38	7.77	6.77	5.09	6.34	6.03	6.4	5.48	7.46	6.59	7.27
4933431G14Rik	NR_045163,NR_045165	0	0	0	0	0	0.04	0	0.17	0	0.06	0	0	0.58	0.09	0	0.1	0.21	0.06	0.2	0	0	0	0	0	0	0	0	0	0.18	0	0	0.06	0	0	0	0	0.08	0.05	0	0	0.08	0	0.04	0	0	0.09	0	0
4933432G23Rik	NR_040716	0	0	0	0	0	0	0	0	0	0	0	0	0	0	0	0	0	0	0	0	0	0	0	0	0	0	0	0	0	0.09	0	0	0	0	0	0	0	0	0	0	0	0	0	0	0	0	0	0
4933432I03Rik	NR_045657	0	0	0	0	0	0.06	0	0	0	0	0	0	0	0	0	0	0	0	0	0	0	0	0	0	0	0	0	0	0	0	0	0	0.08	0	0	0	0	0	0.09	0	0	0	0	0	0	0.11	0	0
4933432I09Rik	NR_015575,NR_027843	0	0	0	0	0.09	0	0	0.11	0.07	0	0.1	0	0.9	0.16	0	0	0.57	0.11	0.06	0.07	0.06	0.06	0	0	0.19	0.07	0	0.12	0	0	0	0.07	0.25	0	0	0	0.07	0	0	0.3	0.08	0.46	0.24	0.11	0.21	0.7	0.36	0.25
4933432K03Rik	NR_102286	0.16	0.25	0.15	0	0.44	0.65	0.15	0.26	0	0.97	0.84	0.35	7.14	0.39	0	0.7	0.3	0.69	1.6	0.32	0.14	0	0	0.17	0.23	0.17	0.25	0.14	0.2	0	0.1	0.89	0.15	0	0	0.48	1.2	0.48	0.7	0.36	0.55	0.34	0.58	1.03	0.83	2.09	0.35	1.2
4933433C11Rik	NM_028961	0.06	0.2	0.06	0	0.22	0.42	0.3	0.26	0.07	0.05	0.05	0.14	1.26	0.46	0	0.37	0.12	0.43	0.29	0.06	0.11	0.22	0.14	0.14	0.63	0.52	0.57	0.11	0.16	0.11	0.24	0.82	0.58	0.24	0	0.32	0.68	0.87	0	0.29	0.14	0.24	0.2	0.1	0.07	0.5	0.07	0.12
4933433F19Rik	NR_045856	0	0	0	0	0	0	0	0	0	0	0	0	0	0	0	0	0	0	0	0	0	0	0	0	0	0	0	0	0	0	0	0	0	0	0	0	0	0	0	0	0	0	0	0	0	0	0	0
4933433G08Rik	NR_105026	0	0	0	0	0	0	0	0	0	0.04	0	0	0.13	0	0	0	0	0	0	0	0	0	0	0	0	0.05	0	0	0	0	0	0.05	0.04	0	0	0	0	0	0.05	0.06	0.06	0	0	0	0	0	0	0
4933433G15Rik	NR_040719	0	0	0	0	0.11	0.05	0	0.06	0	0	0.06	0	0.07	0.29	0	0	0	0	0.07	0	0	0.07	0	0.09	0.11	0	0	0	0	0	0	0	0.22	0	0	0	0	0	0	0	0	0	0.08	0	0	0	0	0
4933433G19Rik	NR_045851	0.09	0.21	0	0	0.3	0.12	0	0.07	0	0	0.06	0	0.39	0	0	0	0.17	0.3	0	0	0	0	0	0.09	0	0	0	0	0	0	0	0	0.24	0.11	0.28	0	0.19	0	0.1	0.4	0	0.09	0.05	0	0.09	0	0.28	0
4933433H22Rik	NR_045458	0	0	0	0	0.03	0	0	0	0	0	0	0	0	0	0	0	0	0	0	0	0	0.04	0	0	0	0	0	0	0	0	0	0	0	0	0	0	0	0	0	0	0	0	0	0	0	0	0	0
4933434E20Rik	NM_001287086,NM_001287087,NM_025762,NM_027500	52.36	60.7	46.27	43.92	51.92	56.71	58.91	51.87	53.59	39.65	44.85	54.52	52.85	53.38	58.41	45.26	39.24	57.59	51.49	47.02	49.67	34.53	38.56	50.47	31.52	48.74	49.41	47.98	39.2	39.27	45.86	53.71	42.65	49.54	50.32	40.82	48.66	46.33	70.12	65.84	56.07	56.6	65.72	65.73	54.52	53.87	71.22	71.3
4933436E23Rik	NR_040455	0	0	0	0	0	0	0	0	0	0	0	0	0	0	0	0	0	0	0	0	0	0	0	0	0	0	0	0	0	0	0	0	0	0	0	0	0	0	0	0	0	0	0	0	0	0	0	0
4933436H12Rik	NR_046208	0	0	0	0	0	0	0	0	0	0	0	0	0	0	0	0	0	0	0	0	0	0	0	0	0	0	0	0	0	0	0	0	0	0	0	0	0	0	0	0	0	0	0	0	0	0	0	0
4933436I01Rik	NM_025763	0	0	0	0	0	0	0	0	0.07	0	0.05	0	0.23	0	0	0	0	0	0.17	0	0	0	0	0	0	0	0.1	0	0.08	0	0	0	0.06	0	0	0	0	0	0	0.22	0.36	0.1	0.17	0.1	0.33	0.08	0.21	0.12
4933438B17Rik	NR_040685	0	0	0	0	0	0	0	0	0	0	0	0	0.21	0	0	0	0	0	0	0	0	0	0	0	0	0	0	0	0	0	0	0	0	0	0	0	0	0	0	0	0	0	0	0	0	0	0	0
4933438K21Rik	NR_045446	0.11	0.04	0.1	0	0	0	0.05	0.04	0	0.05	0.04	0	0.64	0.06	0	0	0.2	0.09	0.29	0	0	0	0	0	0	0	0	0	0	0	0	0.11	0.1	0	0	0	0.06	0.21	0.06	0.12	0.06	0.11	0.08	0	0	0.14	0.12	0
4933439C10Rik	NR_015585	2.38	3.99	3.09	2.96	6.45	4.58	5.96	9.78	5.58	5.32	3.54	6.16	8.19	9.94	2.95	4.21	5.99	6.3	12.09	2.8	5.74	4.91	6.33	7.35	5.96	12.32	21.6	4.04	6.24	8.16	8.82	8.27	12.78	3.93	5.38	6.03	7.71	6.83	7.76	14.97	5.42	14.58	6.48	7.06	7.11	14.51	5.43	10.57
4933439K11Rik	NR_040558	0.99	0.76	0.37	1.49	0.48	0.46	1.12	0.63	0.77	0.26	0.59	0.75	1.07	0.6	0.52	0.29	0.75	0.67	0.8	0.3	0.44	0.26	0.7	0.64	0.28	0.31	0.45	0.08	0.49	0.82	0.43	0.43	0.09	0.36	0.31	0.1	0.21	0.1	2.57	1.66	1.23	1.36	1.33	1.26	0.81	1.16	0.64	2.21
4933440J02Rik	NR_045344	0	0	0	0	0	0	0	0	0	0	0	0	0.07	0.1	0	0	0	0	0	0	0.14	0	0	0	0	0	0	0	0	0	0	0	0	0	0	0	0.17	0	0	0	0	0	0.08	0	0	0	0	0
4933440M02Rik	NR_045803,NR_045804	0	0	0.05	0	0.11	0	0.05	0.04	0.06	0.33	0.08	0.06	0.9	0.25	0	0.24	0	0.13	0.09	0	0	0	0	0	0	0	0	0.19	0	0	0	0.06	0	0	0	0.16	0.35	0.05	0.18	0.06	0.06	0.03	0.03	0.09	0	0.78	0	0.2
5031410I06Rik	NM_207657	0.03	0.02	0	0	0	0.06	0	0	0	0.14	0.03	0.09	1.94	0.15	0.08	0.13	0.03	0	0.34	0	0	0.05	0	0.03	0	0	0.05	0	0	0.05	0	0.13	0	0	0.05	0	0	0.08	1.72	1.53	1.34	1.07	1.11	1.78	1.13	0.71	0.86	1.61
5031414D18Rik	NM_198642	0.07	0.18	0.03	0.15	0.19	0.2	0.16	0.27	0.3	0.35	0.1	0	0.3	0.41	0.26	0.05	0.26	0.09	0.28	0.24	0.36	0.09	0.26	0.11	0.38	0.34	0.81	0.23	0.58	0.62	0.19	0.11	0.25	0.21	0.43	0.82	0.04	0.23	0.07	0.23	0.08	0.09	0.04	0.11	0.03	0.22	0.07	0.38
5031425E22Rik	NR_040469	11.01	11.29	13.15	10.58	13.82	12.54	14.52	13.93	12.44	12.31	11.03	15.12	16.61	13.5	10.57	10.01	10.81	16.11	15.57	13.63	13.26	10.71	11.92	15.48	8.62	13.99	16.73	13.35	12.34	12.04	11.44	13.18	12.52	12.88	11.19	11.7	11.85	11.1	12.17	12.03	10.94	9.34	11.33	9.04	9.42	8.29	11.52	10.67
5031425F14Rik	NR_015558	0.06	0	0	0	0	0	0	0	0	0	0.04	0	0	0	0	0.08	0	0	0	0	0.05	0.1	0.2	0	0.08	0	0.17	0.05	0.07	0.09	0.03	0	0	0.07	0	0.17	0	0	0	0	0	0.21	0	0.09	0.06	0.22	0	0
5031426D15Rik	NR_027890	0.12	0.03	0.02	0	0.01	0.01	0.01	0.05	0.08	0.04	0.01	0	0.1	0.07	0.1	0.02	0	0.04	0.04	0.02	0.1	0.08	0.12	0.02	0	0.01	0.11	0.08	0.02	0	0.05	0.04	0.01	0.06	0.02	0	0.05	0.04	0.08	0.1	0	0.08	0.06	0.12	0.03	0.04	0.05	0
5031434C07Rik	NR_045986,NR_045987	0	0.07	0	0	0	0	0	0.07	0	0.04	0	0.05	0.04	0	0	0.12	0	0.04	0.08	0	0.08	0	0	0	0	0.04	0	0.11	0	0	0	0	0	0	0	0.13	0	0.04	0	0.1	0	0	0	0	0.04	0.06	0	0
5031434O11Rik	NR_033624	0.13	0.2	0	0	0.36	0.26	0.25	1.27	0.44	1.7	0.59	0.43	1.31	1.61	0.17	0	1.75	1.02	1.31	0.92	0.81	0.46	0.93	1.99	0.38	1.79	2.8	1.36	0.81	1.54	1.7	1.15	1.71	1.13	0.63	1.72	0.7	0.91	0.71	1.17	1.2	2.16	0.82	0.63	0.81	1.37	0.99	0.74
5031439G07Rik	NM_001033273	11.68	13.77	11.74	10.08	15.67	15.74	18.55	12.86	16.06	11.25	11.84	16.45	15.69	15.76	15.75	13.86	12.3	17.48	12.58	13.5	14.82	9.29	13.49	14.89	11.43	13.28	14.61	10.9	15.51	11.29	13.55	17.9	14.43	13.3	15.56	13.06	13.72	16.49	17.21	15.48	12.56	16.3	13.61	17.99	11.86	11.57	13.47	17.47
5033403H07Rik	NR_040413	45.62	40.9	47.14	43.9	31.68	38.3	31.06	35.75	29.62	28.74	43.69	28.86	43.73	34.2	22.17	25.87	30.67	30.77	49.76	0.41	0.36	1.25	2.74	1.33	0.89	0.88	2.52	1.22	0.51	2.9	1.14	0.23	0.77	1.25	0	1.23	0.88	1.02	11.73	10.66	12.81	11.57	10.98	8.62	17.97	17.51	13.03	9.6
5033404E19Rik	NR_033600	0	0	0	0	0	0	0	0	0	0	0	0	0	0	0	0	0	0	0	0	0	0	0	0	0	0	0	0.11	0	0	0	0	0	0	0	0	0	0	0.14	0	0	0	0	0	0	0	0	0
5033406O09Rik	NR_029464	1.05	1.7	1.5	1.71	0.76	1.86	1.13	1.3	1.63	0.63	0.82	2.09	1.73	0.38	1.23	1.44	0.99	1.02	1.8	0.21	0.14	0	0.22	0.28	0.22	0.05	0.16	0.32	0.19	0.35	0.35	0.17	0.29	0.45	0.25	0.21	0.17	0.1	2.28	2.36	2.71	2.41	2.49	2.08	1.93	1.58	2.42	3.41
5133400J02Rik	NR_110444	0	0	0	0	0	0	0	0	0	0	0	0	0.09	0	0	0	0	0	0	0	0	0	0.98	0	0	0	0.15	0	0.12	0	0	0.11	0.09	0.12	0.47	0	0	0	0	0.44	0	0	0.21	0	0.2	0.52	0.11	0.18
5330411J11Rik	NR_040510	0	0	0	0	0	0	0	0	0	0	0	0	0	0	0	0	0	0	0	0	0	0	0	0	0	0	0	0	0	0	0	0	0	0	0	0.06	0	0	0.06	0	0	0	0	0	0	0.14	0	0.1
5330413P13Rik	NR_029381	0.12	0	0.05	0	0.08	0.03	0.09	0.18	0.11	0.06	0.05	0.05	0	0.09	0.1	0	0	0	0.18	0	0	0	0	0	0	0	0	0	0	0	0	0	0	0	0	0	0	0	0	0	0	0	0	0	0	0	0	0
5330417C22Rik	NM_001033304	0.08	0.12	0.15	0.47	0.2	0.16	0.22	0.21	0.09	0.39	0.5	0.2	3.78	0.39	0.18	0.43	0.46	0.34	0.34	0.05	0.07	0.07	0.04	0.09	0.11	0.05	0.28	0.09	0.03	0.13	0.1	0.26	0.1	0.1	0.21	0.08	0.23	0.1	0.12	0.15	0.21	0.2	0.11	0.21	0.05	0.64	0.14	0.45
5330426P16Rik	NR_028300	7.04	8.56	6.11	6.71	6.17	5.76	6.1	8.21	5.65	6.59	5.79	6.66	7.04	12.58	5.27	8.38	6.28	7.72	9.93	32.77	34.3	29.98	29.89	35.22	20.8	27.52	42.07	33.12	35.17	33.82	31.3	29.51	31.81	35.96	38.33	29.35	32.6	30.38	29.11	25.72	24.03	26.65	27.9	28.93	26.73	25.12	21.49	25.85
5330434G04Rik	NR_015552	0	0	0	0	0	0	0	0	0	0	0	0	0	0	0	0	0	0	0	0	0	0	0	0	0	0	0	0	0	0	0	0	0	0	0	0	0	0	0	0	0	0	0	0	0	0	0	0
5330439B14Rik	NR_037679	0	0	0	0	0	0	0	0.05	0	0	0	0	0	0	0	0	0	0	0	0	0	0	0.23	0	0	0	0	0	0.08	0	0.04	0	0	0	0	0	0	0.06	0.14	0	0	0	0	0	0	0	0.07	0
5430401F13Rik	NM_001244628	0	0	0	0	0	0	0	0	0	0	0	0	0	0	0	0	0	0	0	0	0	0	0	0	0	0	0	0	0	0	0	0	0	0	0	0	0	0	0	0	0	0	0	0	0	0	0	0
5430402E10Rik	NM_027768	0.83	0.87	1.65	0	2.31	1.08	0.7	0	1.51	0.79	1.48	0.77	1.63	1.31	2.95	0.82	1.55	0.32	0.32	0.24	0.42	0.51	0	0.38	0.17	0.37	0.27	0.3	0.48	0.78	0.54	0	0	0	0.56	0	0	0.23	0.38	0.69	1.3	2.19	0.69	1.13	0.44	1.07	1.42	0.29
5430402O13Rik	NR_015581,NR_027892	4.49	4.58	3.26	4.49	3.78	3.19	2.86	5.04	3.16	3.96	2.73	4.94	3.38	4.42	4.7	4.1	2.81	2.78	4.52	4.61	4.02	6.6	4.82	5.21	2.87	4.76	6.41	5.02	3.54	4.53	5.13	2.9	4.3	5.24	4.25	3.73	4.19	4.22	8.46	8.9	8.15	9.4	8.96	6.64	6.94	9.24	8.9	9.01
5430403N17Rik	NR_046181	0.07	0	0	0	0.07	0	0.07	0.03	0	0	0	0	0	0	0	0	0.03	0	0.06	0.11	0.19	0.03	0	0.04	0.05	0.07	0.16	0.03	0.17	0.12	0.04	0.08	0.13	0.13	0.17	0.18	0	0.1	0.15	0	0.04	0	0.09	0	0.04	0.05	0	0.2
5430405H02Rik	NR_015591,NR_027914	3	2.1	1.54	4.82	2.73	1.99	2.21	2.75	2.96	2.75	2.95	2.12	3.09	4.33	4.16	2.35	1.52	3.21	4.38	1.76	1.38	2.64	0.53	1.88	1.81	2.42	2.43	1.53	2.19	1.75	1.94	0.94	1.24	1.01	1.84	3.11	2.23	2.43	1.3	1.19	2.31	1.56	1.64	2.71	1.68	1.49	2.74	1.38
5430416N02Rik	NR_034038	15.92	13.63	19.27	18.41	30.52	16.21	21	16.47	17.57	13.85	21.28	26.33	25.73	17.04	21.3	14.84	19.53	16.69	14.25	10.37	8.75	11.42	9.16	9.58	11.64	18.62	11.64	10.59	9.26	7.89	12.43	10.08	15.6	9.9	9.78	10.54	11.44	8.61	9.75	8.66	9.8	11.85	11.78	11.29	16.17	14.1	12	7.71
5430416O09Rik	NR_033355	0.13	0.39	0.1	0.85	0.04	0.07	0.08	0.14	0.17	0.13	0.03	0.07	0.02	0.26	0.2	0.38	0.12	0.06	0.24	0.09	0.1	0.08	0.23	0.05	0.06	0.09	0.19	0.17	0.32	0.11	0.07	0.02	0.2	0.08	0.1	0.22	0.07	0.02	0.12	0.39	0.27	0.35	0.16	0.41	0.09	0.29	0.1	0.57
5430419D17Rik	NM_175166	0	0	0	0	0	0	0	0	0	0	0.05	0.07	0	0.04	0	0	0	0	0.06	0	0	0	0	0	0	0	0	0	0	0	0.02	0	0.03	0	0	0.09	0.03	0	0.07	0	0	0	0.02	0	0	0	0.03	0
5430421F17Rik	NR_040352	0.08	0.06	0.05	0	0.16	0.03	0.11	0.03	0	0.07	0.12	0.17	0	0.19	0.41	0.06	0.11	0	0.04	0	0	0	0	0	0.06	0	0	0.03	0.06	0	0	0	0	0.05	0	0.04	0	0	0	0	0	0	0.02	0.06	0	0	0	0
5430421N21Rik	NM_001201323	0	0	0	0	0.14	0.1	0.17	0.12	0.11	0	0.23	0.08	0.05	0	0	0.07	0.05	0.19	0	0	0.11	0	0	0	0.07	0	0	0	0	0	0.03	0	0.06	0	0	0	0	0	0	0.06	0.06	0.14	0.03	0	0	0	0	0.1
5430425K12Rik	NR_103550	0.07	0.06	0.14	0	0.1	0	0	0.12	0	0.19	0.33	0.16	0.13	0.53	0.57	0.32	0.14	0.12	0	0	0.06	0.06	0	0.08	0.21	0.15	0	0	0.18	0	0.18	0.08	0.07	0.18	0.12	0.07	0	0	0.16	0.08	0.17	0	0.11	0	0.07	0.29	0	0
5430427M07Rik	NR_045858	0	0	0	0	0	0	0	0	0	0	0	0	0	0	0	0	0	0	0	0	0	0	0	0	0	0	0	0	0	0	0	0	0	0	0	0	0	0	0	0	0	0	0	0	0	0	0	0
5430427O19Rik	NM_001163539	0.4	0.4	0.28	0.4	0.27	0.47	0.26	0.26	0.41	0.38	0.17	0.32	0.37	0.39	0.42	0.4	0.44	0.37	0.36	0.87	1.46	0.9	1.2	1.1	1.01	0.82	1.32	0.89	1.03	1.32	0.93	1.34	0.55	1.44	1.32	1.1	1.24	1.05	1.74	2.75	1.69	2.18	1.8	2.64	1.99	2.14	2.12	1.73
5430428K19Rik	NR_045426	0	0	0	0	0	0	0	0	0	0	0	0	0	0	0	0	0	0	0	0	0	0	0	0	0	0	0	0	0	0	0	0	0	0	0	0	0	0	0	0	0	0	0	0	0	0	0	0
5430434I15Rik	NR_040541	0	0	0.07	0	0	0	0	0.06	0	0	0	0	0	0.09	0	0	0	0	0	0	0	0	0	0	0	0	0	0	0	0	0	0	0	0	0	0	0	0	0	0	0	0	0	0	0	0	0	0
5430435G22Rik	NM_145509	1.39	3.39	1.38	2.79	2	1.89	2.85	0.97	3.2	3.6	1.46	2.56	2.06	1.97	2.09	4.95	3.6	3.91	1.42	3.59	6.96	2.15	5.83	4.14	4.3	2.84	2.76	2.47	6.84	5.49	3	2.62	2.43	2.59	4.33	4.02	4	8.69	1.58	4.29	3.03	4.52	1.86	4.67	3.7	3.41	2.56	7.47
5430437J10Rik	NR_045274	0	0	0	0	0.05	0.1	0	0	0.09	0	0	0	0	0.1	0.21	0	0	0.07	0	0.08	0	0.07	0	0.09	0	0	0	0.14	0	0.13	0	0.09	0	0	0.13	0	0.08	0.08	0	0	0	0	0	0	0	0	0.08	0
5430440P10Rik	NR_045859	0.46	0.84	0.42	0.2	0.35	0.36	0.6	0.69	0	0.24	0.07	0.41	0.25	0.44	0.48	0.4	0.17	0.31	0.41	0.09	0.24	0	0.13	0.07	0.13	0	0	0.18	0.11	0	0.28	0.2	0.2	0.22	0.15	0	0.57	0.09	1.29	1.21	1.24	0.58	1.14	0.87	1.03	0.12	1.76	0.68
5530400C23Rik	NM_027784	0	0	0	0	0	0	0	0	0	0	0	0	0	0	0	0	0	0.13	0	0	0	0	0	0	0	0	0	0	0	0	0	0	0	0	0	0	0	0	0	0	0	0	0	0	0	0	0	0
5530401A14Rik	NR_038010	0.1	0	0	0	0.03	0.03	0	0.12	0.11	0	0	0.11	0.09	0	0	0.07	0.05	0.04	0.49	0	0	0	0.28	0	0	0	0	0	0	0	0	0	0	0	0	0	0	0	0	0.06	0	0	0	0	0	0	0	0
5530601H04Rik	NR_015467	1.08	1.15	0.75	1.25	0.9	0.77	0.98	0.84	0.9	0.82	0.71	0.74	0.96	1.32	0.75	1.7	0.88	0.6	1.3	1.21	1.08	0.99	0.66	0.77	0.47	0.84	1.47	0.95	1.21	0.6	0.92	0.84	0.87	0.53	0.75	1.13	0.87	0.85	1.09	1.13	0.59	1.07	1.14	0.79	1.05	1.32	0.95	0.84
5730403I07Rik	NR_040378	0	0	0	0	0	0.03	0	0.07	0	0.15	0	0	0.24	0	0	0.06	0	0	0.04	0.09	0.12	0	0.5	0.1	0	0.04	0.2	0.08	0	0	0	0.1	0.04	0	0	0.04	0	0.04	0	0	0.1	0	0	0	0	0	0	0.17
5730405O15Rik	NR_038158	1.58	1.7	1.26	1.82	2.32	1.75	1.99	2.45	1.64	3.71	2.27	1.83	2.46	3.07	1.23	1.52	3.48	2.15	2.38	1.37	1.3	1.46	2.08	0.57	0.6	1.63	3.34	1.27	1.04	0.61	1.49	0.69	1.07	0.9	1	0.32	1.69	1.44	0.57	0.47	0.72	1.89	0.87	0.84	1.19	1.1	0.45	0.59
5730408K05Rik	NR_027866	6.33	12.08	7.87	20.18	9.09	8.87	6.94	7.04	5.91	14.84	6.67	9.44	10.15	7.87	10.96	10.69	12.71	5.53	8.58	13.01	15.02	15.88	13.67	10.56	12.38	10.92	12.28	15.81	8.5	11.61	8.62	9.83	8.95	14.02	8.53	19.84	7.04	7.45	8.79	12.15	7.39	15.12	10.66	7.71	11.16	16.26	9.64	12.85
5730409E04Rik	NM_001013755,NM_001145950	5.59	9.63	4.3	7.79	6.66	5.11	6.49	9.18	8.01	9.43	5.98	5.49	5.83	9.6	6.19	10.13	7.14	6.49	8.21	13.23	17.38	12.56	16.31	11.86	9.15	11.48	15.3	14.64	16.45	13.4	14.5	11.09	12.42	14.9	15	16	15.82	13.27	9.34	11.81	6.71	11.24	10.79	13	8.36	11.31	10.64	10.72
5730412P04Rik	NR_045424,NR_045425	0.5	0.57	0.65	0.27	0.26	0.74	1.24	0.2	0.46	0.21	0.28	1.09	0.94	1.37	0.97	0.9	0.59	1.06	0.56	0.12	0.06	0.86	0.61	1.46	0.53	0.26	1.47	0.43	0.3	0.21	0.54	0.68	0.33	0.76	0.6	0.12	0.66	0.38	10.47	10.95	9.21	10.15	9.38	11.31	9.96	10.42	7.16	10.7
5730416F02Rik	NR_033596	0	0	0	0	0.16	0	0	0	0.26	0	0.09	0	0.1	0	0	0	0	0.1	0.21	0	0	0	0	0	0.16	0	0	0	0	0.1	0	0.25	0	0	0	0	0.25	0	0.13	0	0	0	0	0	0	0	0	0
5730420D15Rik	NR_045338,NR_045339	0.08	0.18	0.07	0	0.11	0.11	0.22	0.13	0.18	0.2	0.12	0.25	0.14	0.29	0.1	0.23	0.08	0.41	0.5	0.08	0.21	0	0	0	0	0	0	0.14	0.1	0.07	0	0	0	0	0	0.08	0	0.08	0.09	0.18	0.09	0	0.08	0	0	0.21	0.17	0
5730422E09Rik	NR_015478	0.16	0.04	0	0	0.15	0.1	0.25	0.08	0.06	0.09	0.08	0.06	0.05	0.13	0.07	0.15	0	0.09	0.05	0.11	0.05	0.09	0	0.11	0	0.21	0.16	0.05	0.13	0.04	0.06	0.06	0.24	0	0.08	0	0.11	0.05	0.29	0.24	0	0.34	0.11	0.17	0.22	0.14	0.06	0.2
5730435O14Rik	NR_045341	0	0	0	0	0	0	0	0	0	0	0	0	0	0	0	0	0	0.13	0	0	0	0	0	0	0	0.33	0	0	0.19	0	0	0	0	0	0	0.31	0	0	0.17	0.17	0.36	0.25	0.32	0	0.32	0	0.17	0.29
5730455P16Rik	NM_027472	9.1	7.16	7.37	4.2	7.75	6.93	9.45	7.65	9.53	5.08	5.9	8.62	7.49	10.51	9	5.57	5.82	8	8.34	8.7	8.96	5.51	5	8.5	3.22	6.96	8.81	6.26	7.95	6.43	8.29	8.08	7.26	8.69	9.59	6.24	8.1	9.54	10.59	9.63	7.45	6.99	8.26	12.52	7.42	8.31	9.29	10.78
5730457N03Rik	NR_038163	0.58	0.19	0.25	0.4	0.25	0.82	0.43	0.49	0.51	0.21	0.39	0.63	0.49	0.85	0.24	0.27	0.32	0.73	0.61	0	0	0	0	0	0	0	0	0	0	0	0	0	0	0	0	0	0.07	0	0	0	0	0	0	0	0	0	0	0
5730460C07Rik	NR_045801	0	0	0	0	0	0	0	0	0.05	0	0	0	0	0	0	0	0	0	0	0	0	0	0	0	0.07	0	0	0	0	0	0	0	0	0	0	0	0	0.14	0	0	0	0	0	0	0	0	0	0
5730480H06Rik	NR_045500	1.2	0.48	0.72	3.29	1.54	1.24	1.32	1.21	1.86	1.66	1.13	1.41	1.96	0.95	0.75	0.98	2.03	1.72	1.23	0.58	0.37	0.77	1.52	0.96	0.44	1.43	1.41	0.86	0.71	0.96	0.87	0.73	1.29	0.77	0.99	1.63	0.89	0.56	0.34	1.17	0.7	1.16	0.93	0.5	1.07	0.89	0.79	0.97
5730488B01Rik	NR_073462	0	0	0	0	0	0	0	0	0	0	0	0	0	0	0	0	0	0	0	0	0	0	0	0	0	0	0	0	0	0	0	0	0	0	0	0	0	0	0	0	0	0	0	0	0	0	0	0
5730507C01Rik	NM_001033157,NM_001201330	9.7	7.01	7.37	4.37	7.76	6.89	8.51	6.51	8.07	6.7	6.43	10.85	8.27	12.1	8.49	7.76	7.81	8.76	6.74	4.94	3.4	2.9	2.51	5.94	2.68	5.56	5.71	4.02	4.12	3.65	4.64	5.31	4.45	4.43	3.92	4.42	4.14	5.22	3.07	3.67	3.91	2.91	3.32	5.76	4.46	3.43	4.77	4.74
5730508B09Rik	NM_027482	5.22	5.21	4.18	5.53	4.24	4.55	4.72	2.67	4.47	4.38	4.26	4.59	5.78	4.11	3.99	4.02	5.36	4.61	4.26	7.93	8.27	7.98	6.98	8.91	5.6	10.2	9.17	7.4	7.41	8.73	8.15	8.28	9.53	9.92	8.7	8.11	4.97	9.12	12.97	10.31	11.28	8.21	10.02	12.59	12.56	12.85	11.82	11.06
5730522E02Rik	NR_027973	0	0.05	0.06	0	0	0	0	0	0.07	0	0	0.06	0	0	0	0	0	0	0.05	0	0.05	0	0	0	0.08	0	0.09	0.21	0	0	0.04	0	0	0	0	0	0	0	0.19	0.4	0.4	0.06	0.22	0.48	0.31	0.78	0.26	0.45
5730559C18Rik	NM_028872	5.08	3.22	4.43	3.81	4.24	4.23	4.98	3.82	5.8	5.04	3.8	7.05	6.33	2.07	3.72	3.96	2.84	9.22	5	20.78	22.6	14.81	21.93	27.61	11.8	20.3	22.44	21	21.85	19.8	21.02	31.46	23.77	25.56	27.37	22.18	20.94	25.12	22.97	16.99	16.32	20.9	17.87	19.44	13.87	19.6	21.03	16.48
5830411N06Rik	NM_001128145,NM_001128146,NM_175533	0	0	0	0.4	0.02	0.02	0.08	0.05	0.03	0	0.02	0	0.03	0	0.04	0.04	0	0.05	0.03	0	0.19	0.1	0.28	0.03	0.38	0.12	0.09	0.1	0.11	0.15	0.09	0.03	0.05	0	0.05	0.09	0.13	0.06	0	0.07	0.03	0.13	0.06	0.05	0.03	0.04	0.03	0
5830415F09Rik	NM_029086	4.73	4.1	2.91	3.8	5.25	4.3	5.14	4.25	3.7	4.36	4.22	4.66	5.38	3.95	4.64	3.89	4.7	4.4	4.17	3.23	3.71	2.72	3.31	3.27	1.98	3.56	4.63	3.58	3.96	3.4	3.01	3.57	2.51	4.46	4.53	3.53	2.94	3.68	4.31	3.67	4.86	5.46	5.27	5.28	3.46	4.9	3.89	4.77
5830416I19Rik	NR_045384	0.44	0.16	0.16	0.67	0.28	0.16	0.03	0.35	0.42	0.09	0.2	0.22	0.21	0	0.09	0.4	0.23	0.17	0.28	0.03	0	0.03	0	0.07	0	0.07	0.2	0	0	0	0.04	0.18	0.03	0	0	0.03	0	0.03	0.22	0.42	0.53	0.32	0.45	0.49	0.35	0.13	0.51	0.44
5830416P10Rik	NR_028427	0.2	0.01	0.14	0.18	0.13	0.14	0.11	0.31	0.17	0.23	0.17	0.11	0.18	0.26	0.38	0.19	0.37	0.11	0.11	1.53	1.23	0.82	0.86	1.3	0.61	0.91	0.97	0.99	0.93	1.35	0.95	0.62	0.95	0.92	1.06	0.61	1.37	1.1	0.26	0.32	0.17	0.12	0.31	0.34	0.16	0.15	0.11	0.16
5830417I10Rik	NR_028359	3.94	4.23	3.71	5.14	4.71	3.93	5.76	3.89	5.53	2.97	3.6	5.17	5.46	6.14	5	3.4	2.98	5.19	3.2	3.19	4.02	1.79	3.24	4.17	1.5	4.39	5.16	2.61	4.2	2.84	3.58	5.21	4.3	3.43	4.74	3.94	4.83	4.12	5.94	5.74	2.63	3.45	4.61	6.34	3.41	4.64	4.93	6.08
5830418P13Rik	NR_040466	0	0	0	0	0.03	0	0	0	0	0	0.03	0	0	0	0	0	0	0	0	0.04	0	0.04	0.21	0	0	0	0.06	0.14	0	0.03	0	0	0	0	0	0	0	0	0.04	0.05	0	0	0.06	0	0	0	0	0.15
5830428M24Rik	NR_038060,NR_038061	3.84	3.18	3.07	3.49	4.13	4.64	3.78	3.36	4.57	7.26	5.51	6.19	5.08	6.76	5.46	4.52	6.46	4.71	4.87	2.87	2.77	3.73	3.09	2.21	1.91	3.41	4.46	1.78	2.44	3.94	3.7	2.82	3.38	3.4	3.28	2.07	3.72	2.61	3.69	3.19	2.84	1.99	3.99	3.57	4.22	3.73	3.47	3.01
5830432E09Rik	NR_015548	0	0.33	0.06	0	0.13	0.12	0.06	0.1	0.07	0.26	0.05	0.07	0	0.22	0.08	0.62	0.29	0.21	0.06	0	0.11	0.11	0.3	0.07	0	0.12	0	0.16	0.15	0.2	0.07	0.07	0.06	0.08	0.19	0.25	0.39	0.12	0.07	0	0.07	0.06	0.1	0.19	0	0.08	0.2	0.11
5830444B04Rik	NR_102283,NR_102284,NR_102287	0	0	0	0	0	0	0.03	0.04	0	0	0.02	0	0	0	0	0	0	0	0	0	0	0	0	0.19	0	0	0	0	0.06	0.08	0	0	0	0	0	0	0	0	0.04	0.04	0	0	0	0	0	0	0.04	0
5830454E08Rik	NR_073359	3.94	4.3	3.53	3.01	4.11	4.41	3.62	5.92	3.68	3.83	4.64	2.5	3.67	4.96	2.98	2.58	3.49	4.03	5.86	6.35	7.17	7.83	9.6	5.07	7.45	6.75	11.75	7.52	5.97	6.03	5.79	4.72	6.22	6.07	5.68	8.02	5.84	4.87	4.54	3.68	5.5	4.43	4.28	2.64	4.3	2.98	3.42	2.61
5830473C10Rik	NM_001252661	0.08	0.03	0	0.09	0.03	0	0	0.03	0	0.03	0.06	0	0.07	0	0	0.06	0	0.03	0.18	0	0.04	0	0	0	0.06	0.04	0	0	0.05	0.07	0.05	0.04	0	0	0	0	0	0.12	0.13	0.18	0.18	0.06	0.19	0.45	0.08	0.21	0.26	0.15
5930403L14Rik	NR_045643	3.77	4.33	3.15	2.79	5.46	3.17	5.3	6.53	4.28	3.89	2.36	3.95	3.02	8.34	6.94	3.96	4.06	3.28	3.65	0.43	0.23	0.15	0.08	0.13	0.09	0.25	1.14	0.29	0.25	0.2	0.17	0.17	0.23	0.27	0.32	0.33	0.3	0.18	0.17	0.32	0.12	0.09	0.25	0.22	0.11	0.1	0.22	0.26
5930412G12Rik	NR_015517	0.67	0.58	0.65	0.24	0.56	0.29	0.52	0.36	1.12	0.71	0.56	1.17	0.37	0.68	0.34	0.92	0.96	0.57	0.68	0.26	0.36	0.32	0.11	0.24	0.21	0.53	0.45	0.19	0.28	0.22	0.14	0.4	0.31	0.14	0.3	0.45	0.32	0.4	0.32	0.42	0.04	0.1	0.27	0.12	0.23	0.05	0.12	0.14
5930430L01Rik	NR_102383,NR_102384	4.41	4.2	3.23	4.28	3.33	3.5	3.43	4.07	3.9	2.71	2.93	3.81	3.29	5.05	3.84	3.56	2.96	3.68	4.85	3.49	3.44	2.1	2.21	3.51	2.01	2.76	5.29	2.5	3.83	2.76	3.1	3.14	2.58	3.54	3.88	2.9	2.8	3.62	3.77	3.57	3.38	2.66	3.34	4.36	2.53	2.65	4.41	4.24
5930438M14Rik	NR_046158	0.15	0	0.07	0.4	0.1	0.14	0.17	0.15	0.04	0.13	0.08	0.2	0.13	0.18	0	0.11	0.07	0.19	0.23	0.11	0	0.03	0.1	0.32	0.1	0.19	0.11	0.06	0.23	0.06	0.18	0.24	0.17	0.05	0.12	0.15	0.12	0.07	0.16	0.04	0.08	0	0.04	0.12	0.04	0	0	0
6030407O03Rik	NR_045311	0	0	0	0	0	0.03	0	0	0	0	0.04	0.05	0	0.06	0	0	0.1	0	0	0.91	0.58	0.13	0.43	0.87	0.28	0.51	0.15	0.09	1.05	0.59	0.93	0.22	0.41	0.93	0.72	0.46	0.38	0.15	0	0.06	0	0.19	0.18	0.08	0	0	0.11	0.09
6030408B16Rik	NR_033803	0.96	4.26	1.18	4.29	1.32	1.27	0.81	0.92	2.35	5.72	1.09	1.73	1.19	1.83	2.27	4.12	4.13	2.25	1.45	1.81	3.33	3.85	3.51	1.38	3.81	0.7	1.72	1.55	4.02	2.79	1.21	1.33	0.92	1.02	1.89	3.56	1.52	2.67	1.99	4.28	3.4	5.14	2.95	5.24	4.92	5.66	2.47	5.37
6030419C18Rik	NM_176921	0.84	0.55	1.13	1.74	0.61	0.47	0.63	0.81	1.26	1.88	0.63	0.68	0.56	0.61	0.49	1.22	1.44	0.82	1.11	1.4	1.83	1.16	1.37	1	1.24	0.72	1.83	1.09	1.25	0.67	0.88	0.41	0.84	0.83	1.53	1.7	0.5	1.51	0.55	1.42	0.61	1.65	0.79	0.53	1.12	1.44	0.63	1.72
6030440G07Rik	NR_036598	0.08	0.34	0.08	0	0.09	0.1	0	0.16	0.01	0	0.07	0.1	0.11	0	0	0.06	0	0.14	0	0	0.5	0.1	0	0.27	0.12	0.09	0.38	0.24	0.21	0.07	0	0	0.33	0.19	0.42	0	0.13	0.27	0.65	2.49	1.43	0.19	0.93	0.95	0.62	0.89	1.4	1.27
6030443J06Rik	NR_102315	0.29	0.3	0.25	0.09	0.38	0.2	0.33	0.2	0.45	0.12	0.2	0.56	0.39	0.59	0.27	0.27	0.21	0.41	0.46	0.15	0.18	0.12	0.03	0.29	0.06	0.29	0.52	0.13	0.15	0.09	0.21	0.46	0.34	0.13	0.29	0.21	0.48	0.34	0.56	0.42	0.23	0.16	0.24	0.38	0.19	0.16	0.11	0.38
6030458C11Rik	NM_001166360,NM_029998	8.46	6.72	6.98	7.55	8.08	7.54	9.56	7.86	10.8	6.62	6.7	7.95	8.58	10.74	8.89	7.03	7.18	8.1	10.16	9.86	9.9	6.29	8.75	10.59	4.19	9.47	12.38	9.76	10.23	9.14	10.31	10.64	9.51	11.75	12.51	9.81	10.16	9.88	15.54	13.38	12.07	11.45	14.67	17.78	11.12	15.42	13.6	14.51
6030466F02Rik	NR_040702	0	0.05	0.06	0	0	0.04	0	0	0	0.27	0.09	0	0.06	0.08	0	0	0.06	0	0.06	0	0	0.05	0	0	0	0	0.1	0	0.31	0.05	0	0	0.06	0.08	0	0	0	0	0	0	0	0	0	0	0	0	0.14	0.12
6030468B19Rik	NM_029964	0	0	0	0	0	0.06	0	0.14	0	0.07	0.06	0	0	0.21	0	0	0	0.07	0	0	0	0	0	0	0	0	0	0	0	0	0	0	0.08	0	0	0	0	0	0	0.1	0.1	0	0	0	0	0	0	0
6030469F06Rik	NR_102715	0	0	0	0	0	0	0	0	0	0	0	0	0	0	0	0	0	0	0	0	0	0	0	0	0	0	0	0	0	0	0	0	0	0	0	0	0	0	0	0	0	0	0	0	0	0	0	0
6030498E09Rik	NM_183126	0	0	0.07	0	0.11	0	0	0	0	0	0	0	0	0	0	0	0	0	0	0	0	0.07	0	0.08	0.11	0	0	0	0	0	0	0	0	0	0	0	0	0	0	0	0	0	0	0	0	0	0	0
6230400D17Rik	NR_029446	0.42	0.26	0.86	0.37	1.05	0.67	0.8	0.61	0.47	0.22	0.69	1.2	1.22	0.62	0.22	0.61	1.04	0.87	0.92	0.94	0.67	0.29	0.3	1.19	0.84	1.92	1.66	0.29	0.94	0.35	0.78	1.01	1.56	1.15	0.67	0.43	0.64	0.66	1.38	0.76	0.48	0.4	0.88	0.68	0.78	1	0.91	0.79
6330403A02Rik	NM_001081227	0.35	0.64	0.35	0.41	0.26	0.11	0.24	0.13	0.37	0.3	0.18	0.22	0.19	0.36	0.26	0.45	0.1	0.18	0.4	2.17	1.05	1.26	0.45	1.37	0.96	1.5	1.21	2.05	0.85	0.65	1.16	0.75	1.31	1.71	0.7	0.93	1.37	0.99	0.37	0.37	0.24	0.31	0.35	0.32	0.33	0.27	0.36	0.5
6330403K07Rik	NM_134022	2.67	2.94	1.78	0.62	3.52	2.36	3.19	2.32	1.77	2.39	2.12	2.27	2.8	4.05	3.11	3.54	3.01	1.59	2.52	1.66	2.06	1.87	1.01	1.22	2.09	2.6	1.7	2.31	0.77	1.47	1.61	0.98	2.44	1.96	0.63	1.43	1.95	1.49	0.12	0.13	0.32	0.33	0.27	0.09	0.35	0.67	0.31	0
6330407A03Rik	NR_028126	0	0	0	0	0	0	0.09	0	0	0	0	0	0	0	0	0	0	0.04	0	0	0.04	0	0	0	0	0	0	0	0	0	0	0.05	0	0	0	0	0	0.05	0	0	0	0	0	0	0	0	0	0
6330408A02Rik	NM_177312	2.38	2.21	2.11	3.02	2.58	2.2	2.63	2.56	2.74	3.27	2.29	2.11	2.26	2.12	1.71	2.63	2.4	2.61	2.32	2.29	2.33	1.75	1.99	2.56	1.68	3.14	3.18	1.83	2.2	2.42	2.53	2.62	3.25	3.03	2.4	1.83	3.17	2.65	3.3	2.98	2.15	2.96	2.89	3.97	2.18	2.91	3.04	3.37
6330409D20Rik	NM_027529	0	0	0	0	0.06	0	0	0	0	0	0	0	0.07	0	0	0	0	0	0.07	0	0	0	0	0	0.12	0	0	0	0	0	0	0	0	0	0	0	0	0.16	0.09	0	0	0	0	0	0	0	0	0
6330410L21Rik	NR_040589	0.05	0.02	0	0	0.02	0.02	0.05	0	0.14	0	0.02	0.03	0.02	0	0.1	0.03	0.02	0.12	0.02	0.07	0.02	0	0.12	0.16	0	0.1	0.18	0.15	0.09	0	0.12	0.13	0.13	0.06	0.15	0	0.13	0.24	0.08	0.25	0.03	0.09	0.17	0.35	0.12	0	0.05	0.14
6330415B21Rik	NR_045141	0	0	0	0	0	0	0	0	0	0	0	0	0	0	0	0	0	0	0	0	0	0	0	0.04	0	0	0	0	0	0	0	0	0	0	0	0	0	0	0	0	0	0	0	0	0	0	0	0
6330415G19Rik	NR_126484,NR_126485	3.61	1.97	2.65	1.04	1.67	1.73	1.68	2.75	2.13	1.17	2.1	2.61	2.74	1.5	1.54	1.06	2.37	3.71	4.91	1.55	1.93	1.65	3.28	2.01	1.02	1.88	3.62	1.74	1.58	2.26	1.92	1.92	1.83	1.58	1.06	1.49	2.17	3.2	7.69	6.71	4.5	4.8	7.42	3.7	6.18	6.29	5.49	5.41
6330416G13Rik	NM_144905	13.67	13.51	13.18	11.18	16.72	16.67	19.13	17.76	18.41	12.69	12.78	16.24	16.21	21.61	15.42	12.78	14.05	14.9	13.32	6.08	7.81	5.47	6.99	7.35	5.2	6.65	10.18	7.08	7.66	7.39	6.63	8.96	8.02	6.53	8.92	7.27	8	7.37	13.27	11.14	7.72	13.04	8.72	13.05	7.62	10.6	9.93	12.68
6330418K02Rik	NR_045821	7.69	7.28	7.29	7.99	8.12	8.13	6.55	8.64	7.36	9.12	7.49	6.22	7.49	11.45	7.76	7.93	6.47	7.66	9.46	1.7	2.07	1.3	0	1.33	2.07	1.25	0.99	2.49	1.74	0.74	1.53	1.19	1.49	1.14	0.89	1.18	2.07	1.18	2.56	2.17	1.25	1.06	2.3	1.28	0.72	0.52	2.13	1.79
6330419J24Rik	NR_028086	5.99	5.51	4.65	5.15	4.87	5.29	6.6	6.17	5.48	4.93	3.67	5.24	4.89	6.36	4.04	6.04	5.25	4.88	4.97	19.52	23.74	14.71	20.15	19.85	12.25	18.45	26.24	17.41	20.65	19.8	18.91	19.84	18.96	22.79	22.67	17.68	23.37	20.7	37.83	36.83	30.74	41.51	33.42	38.87	31.08	39.95	34.48	39.13
6330549D23Rik	NR_003619	0.49	0.32	0.32	0.53	0.44	0.33	0.37	0.4	0.44	0.19	0.13	0.29	0.55	0.61	0.46	0.31	0.16	0.32	0.61	0.84	0.27	0.33	0.15	0.13	0.14	0.12	0.51	0.36	0.53	0.41	0.23	0.44	0.11	0.5	0.49	0.61	0.08	0.41	0.46	0.67	0.14	0.31	0.66	0.47	0.25	0.6	0.51	0.26
6430411K18Rik	NR_002848	0	0	0	0	0	0	0	0	0	0	0	0	0	0	0	0	0	0	0	0.21	0	0	0	0	0	0	0	0	0	0	0	0	0	0	0	0	0.09	0	0	0	0	0	0	0	0	0	0	0
6430503K07Rik	NR_108091	0	0	0	0	0	0	0	0	0	0	0	0	0	0	0	0	0	0	0	0	0	0	0	0	0	0	0	0	0	0	0	0	0	0	0	0	0	0	0	0	0	0	0	0	0	0	0	0
6430531B16Rik	NM_001033465	1.11	0.73	0.66	3.43	1.03	0.79	0.6	1.2	0.62	0.95	1.42	0.43	4.62	0.67	0.1	1.38	0.9	1.01	1.29	0.08	0	0.48	0	0	0.67	0.08	0.12	0.2	0.1	0.13	0.15	0.34	0.15	0.29	0.25	0.08	0.25	0.31	0.17	0.09	0.36	0.04	0.21	0.38	0.24	0.41	0.26	0.44
6430548M08Rik	NM_001163760,NM_001163761,NM_001163762,NM_172286	8.98	8.53	10.94	9.58	8.58	12.92	15.94	10.97	12.14	7.49	9.26	13.32	14.34	11.56	8.26	9.5	5.69	12.25	13.01	9.37	12.31	6.21	9.85	12.83	6.15	15.98	12.73	8.4	11.32	8.25	10.81	16.47	15.02	10.34	13.55	11.01	15.76	12.33	11.58	10.92	7.29	9.09	7.96	11.02	7.49	7.6	10.02	10.93
6430550D23Rik	NM_001145351,NM_001145352	0.72	0.98	0.8	0.21	0.93	0.79	0.54	0.96	0.64	0.66	0.61	0.68	0.99	0.82	1.12	0.49	0.38	0.82	0.96	0.29	0.73	0.29	1.06	0.52	0.41	0.39	0.51	0.38	0.71	0.64	0.59	0.77	0.57	0.57	0.84	0.44	0.41	0.23	0.81	0.81	0.92	0.77	0.78	0.41	0.69	1.27	0.62	0.54
6430562O15Rik	NR_015515	0.16	0	0.25	0	0.04	0.1	0.4	0.17	0.18	0.14	0.12	0	0.19	0.26	0.07	0.08	0.05	0.09	0.1	0.16	0.29	0.14	0.5	0.23	0.15	0.43	0.87	0.14	0.13	0.18	0.1	0.11	0.2	0.2	0.17	0.17	0.23	0.31	0.23	0.18	0.18	0.56	0.34	0.08	0.54	0.07	0.35	0.4
6430571L13Rik	NM_175486	0.63	0.24	0.62	0.23	0.46	0.58	0.56	0.62	0.82	0.45	0.37	0.98	0.85	0.3	0.14	0.2	0.13	0.8	1.02	1.49	1.43	0.64	0.47	1.25	0.64	1.78	1.42	1.19	1.08	1.7	0.95	1.58	1.12	0.96	1.17	0.99	1.05	1.29	0.31	0.71	0.79	0.28	0.75	0.5	0.57	0.37	0.68	0.65
6430573F11Rik	NM_176952	2.08	2.53	2.06	2.37	2.42	1.66	2.09	2.5	1.82	2.21	2.14	1.66	2.22	3.05	2.39	2.51	1.74	2.18	2.11	4.45	4.03	4.37	7.41	4.43	3.28	5.58	5.86	5.23	4.4	4.46	3.96	4.36	5.02	5.01	4.31	5.3	5.84	4.32	2.64	2.73	2.23	2.54	2.17	2.59	3.49	5.27	2.56	3.69
6430584L05Rik	NR_046179	0.06	0.04	0	0	0.02	0	0.03	0	0.09	0	0.06	0	0.03	0.03	0	0.08	0.11	0	0	0	0.03	0	0	0.03	0	0	0.21	0.05	0	0	0.07	0	0.03	0.04	0	0.03	0.06	0	0.06	0.19	0	0.08	0.03	0	0.03	0.07	0	0.11
6430706D22Rik	NR_040291	2.43	1.57	1.7	2.97	3.01	2.67	5.3	4.21	2.85	1.77	2.29	3.01	4.44	4.52	1.6	2.42	1.3	3.02	2.27	3.37	3.38	2.56	3.85	3.39	2.09	3.94	4.48	2.59	3.98	3.04	2.69	3.74	4.09	2.75	2.79	3.91	4.26	3.42	2.01	3.09	1.66	1.72	1.93	2.87	1.56	1.85	2.02	3.67
6430710C18Rik	NR_102348,NR_102349	0	0	0	0	0.06	0	0	0	0	0	0	0	0.08	0	0	0	0	0	0	0	0	0	0	0	0	0	0	0	0	0	0	0	0	0	0	0	0	0	0	0.06	0	0	0	0	0.09	0	0	0
6530402F18Rik	NR_029460	0.1	0.56	0.06	0.59	0.29	0.24	0.31	0.12	0.67	0.52	0.17	0.44	0.28	0.37	0.19	0.88	0.35	0.31	0.13	0.41	0.88	0.54	1.01	0.36	0.47	0.58	0.72	0.45	1.02	0.52	0.51	0.31	0.7	0.67	0.76	0.88	0.51	0.71	0.25	0.73	0.16	0.58	0.28	1.19	0.28	0.86	0.31	1.37
6530411M01Rik	NR_027881	0	0	0	0	0	0	0	0	0	0	0	0	0	0	0	0	0	0	0	0	0	0	0	0	0	0	0	0	0	0	0	0	0.14	0	0	0	0	0	0	0	0	0	0	0	0	0	0	0
6720468P15Rik	NR_040306,NR_040307	0	0	0	0	0.09	0	0.06	0	0	0.06	0	0.07	0.14	0	0	0.1	0	0	0.12	0	0	0	0	0	0	0	0	0	0	0	0	0	0	0	0	0	0	0	0	0.08	0.08	0	0	0	0.07	0	0	0
6720483E21Rik	NR_040492	0	0	0	0	0	0	0	0.07	0.09	0	0	0	0	0	0	0	0	0	0.07	0.17	0.07	0.28	0	0	0.23	0.59	0.37	0.07	0.1	0	0.05	0.18	0.3	0	0.13	0.25	0.35	0.16	0	0	0	0	0	0	0	0	0	0
6720489N17Rik	NM_173381	0.97	0.88	0.56	1.26	0.62	0.74	0.59	0.69	0.9	1.58	0.5	1.3	0.52	1.02	1.02	1.03	1.21	1.15	1.12	0.89	1.64	1.14	0.62	1.01	0.48	0.86	2.04	0.98	1.53	1.07	1.17	0.34	1.11	0.89	1.02	1.24	0.9	1.22	0.43	0.79	0.53	0.61	0.65	1.71	1	0.76	0.96	1.33
6820408C15Rik	NM_001289738,NM_177656,NR_110367,NR_110368	2.1	1.67	1.29	0.24	1.22	1.52	1.96	3.56	1.85	1.9	2.6	1.39	4.04	2.79	2.35	2.34	2.75	1.6	3.66	0.27	0.14	0.61	0	0.24	0.23	0.11	0.73	0.05	0.34	0.36	0.14	0.23	0.63	0.28	0.26	0.05	0.58	0.27	1.87	2.23	1.77	2.19	2.52	1.96	2.04	2.21	1.04	1.02
6820431F20Rik	NR_030708	69.01	45.83	58.58	52.3	67.09	60.54	75.4	63.23	71.02	43.97	55.12	80.05	82.64	100.1	65.15	45.89	45.6	79.22	86.36	37.11	37.98	29.56	32.74	47.32	14.86	53.6	92	31.69	36.19	32.95	41.07	47.65	47.82	39	42.38	36.01	48.82	47.94	66.3	61.09	55.49	48.92	58.03	62.9	55.17	60.54	58.58	65.27
7420426K07Rik	NM_001033983	0	0	0	0	0	0	0	0	0	0	0	0	0	0	0	0	0	0	0	0	0	0	0	0	0	0	0	0	0	0	0	0	0	0	0	0	0	0	0	0	0	0	0	0	0	0	0	0
7420461P10Rik	NM_001177581	0	0	0	0	0	0	0	0	0	0	0	0	0.11	0	0	0	0	0	0	0	0	0	0	0	0	0	0	0	0	0	0.08	0	0	0	0	0	0	0	0	0	0	0	0	0	0.13	0	0	0
7420700N18Rik	NR_046272	0	0	0	0	0	0	0	0.04	0	0	0	0	0	0	0	0	0	0	0	0	0	0	0	0	0	0	0	0	0	0.04	0	0	0	0	0	0	0	0	0	0	0	0	0	0	0	0	0	0
7420701I03Rik	NR_045860	0	0	0	0	0	0	0	0	0	0	0	0	0	0	0	0	0	0	0	0	0	0	0	0	0	0	0	0	0	0	0	0	0	0	0	0	0	0	0	0	0	0	0	0	0	0	0	0
7530416G11Rik	NM_001256072	0	0	0	0	0	0	0	0	0	0	0	0	0	0	0	0	0	0	0	0	0	0	0	0	0	0.13	0	0	0	0	0	0.09	0	0.1	0	0	0	0	0	0.09	0	0	0	0	0	0	0	0.29
7630403G23Rik	NR_040744	0	0	0	0	0	0	0	0	0	0	0	0	0	0	0	0	0	0	0	0	0	0	0	0	0	0	0	0	0	0	0	0	0	0	0	0	0	0	0	0	0	0	0	0	0	0	0	0
8030411F24Rik	NM_030135	2.4	3.68	1.48	5.84	2.53	2.36	2.29	3.47	2.85	2.9	3.81	2.98	4.2	5.49	3.75	4.86	5.59	1.51	4.92	0	0	0	0	0.17	0	0	0.24	0	0	0	0	0	0.15	0.2	0	0	0	0	0.35	0	0	0	0	0	0.16	0	0	0
8030423F21Rik	NR_045738	0.11	0.43	0.1	0.16	0.04	0.13	0.12	0.12	0.33	0.21	0.02	0.17	0.09	0.04	0.32	0.21	0.34	0.38	0.11	0.37	0.22	0.44	0.02	0.14	0.24	0.24	0.28	0.38	0.12	0.26	0.11	0.11	0.13	0.11	0.17	0.24	0.07	0.12	1.56	1.99	1.16	1.29	1.36	1.64	1.51	0.99	1.6	0.93
8030423J24Rik	NM_029873	0	0	0	0	0	0	0	0	0	0	0	0	0	0	0	0	0	0	0	0	0.09	0	0	0	0	0	0	0	0	0	0	0	0	0	0	0	0	0	0	0	0	0	0	0	0	0	0	0
8030442B05Rik	NR_040615	0.08	0	0	0	0	0	0	0	0	0	0	0	0	0	0	0	0	0	0	0.05	0	0	0	0	0	0	0	0.11	0	0.07	0	0	0	0	0	0	0	0.14	0	0.1	0	0	0	0	0	0	0	0
8030443G20Rik	NR_040664	0	0	0	0	0	0	0	0	0	0	0	0	0	0	0	0	0	0.09	0	0.21	0	0.09	0	0	0	0	0.16	0	0	0.36	0	0.12	0.09	0	0	0	0	0	0.83	0.73	0.72	0.23	0.39	0.53	0.89	1.86	1.46	0
8030462N17Rik	NM_178670	5.18	4.69	4.23	3.18	5.58	4.53	7.07	3.36	6.67	2.67	3.89	6.48	4.73	5.88	5.76	3.52	3.29	6.26	3.03	4.46	4.25	2.1	2.32	4.5	1.47	4.42	4.2	3.26	4.31	2.39	4.67	6.46	4.16	4.68	4.16	3.24	4	5.14	7.86	4.89	3.74	3.52	5.55	6.98	4.24	4.36	6.09	7.08
8430408G22Rik	NM_001166580,NM_145980	0.77	0.81	2.82	0.45	1.05	0.96	1.5	4.17	0.62	0.78	0.57	0.3	0.44	5.48	2.18	0.61	0.4	0.24	12.77	0.63	0	1.57	0.3	0.37	0.59	0.07	10.85	1.38	0.34	0.35	0.73	0.07	0.89	0.6	0.33	0.49	0.3	0.27	0.53	0.23	0.39	0.29	0.47	0.11	0.21	0.36	0.22	0.13
8430419L09Rik	NM_028982	9.72	7.77	7.57	8.85	5.78	7.25	9.02	7.8	11.31	5.57	6.13	9.46	8.27	4.68	6.51	6.22	3.89	9.64	8.94	22.19	22.47	12.59	19.56	26.72	10.7	23.12	20.62	21.16	22.8	14.46	20.48	31.04	21.68	25.05	23.08	20.28	23.48	23.31	20.07	14.26	13.5	14.39	17.74	16.84	10.82	14.44	19.3	19.94
8430422H06Rik	NR_045373	0	0	0	0	0	0	0	0	0	0	0	0	0	0	0	0	0	0	0	0	0	0	0	0	0	0	0	0	0	0	0	0	0	0	0	0	0	0	0	0	0	0	0	0	0	0	0	0
8430423G03Rik	NR_040686	0	0	0	0	0	0	0	0	0	0	0	0.16	0	0	0	0	0	0	0	0	0	0	0	0	0.21	0.16	0	0	0	0	0	0	0	0	0	0	0	0	0	0	0	0	0	0	0	0	0	0
8430426J06Rik	NR_077229,NR_077230,NR_077231	0.11	0.88	0.88	2.21	0.47	0.45	0.57	1	0.51	2.05	0.42	0.37	0.51	0.97	0.15	1.32	1.18	0.71	1.34	2.05	1.03	2.14	1.37	1.47	1.94	1.13	1.72	1.76	1.26	0.95	1.41	1.73	1.69	0.98	0.91	1.37	2.19	1.01	0.86	2.71	2.66	2.35	1.66	0.92	2.33	1.04	0.98	1.05
8430429K09Rik	NR_028317,NR_045275,NR_045276	2.24	2.75	2.41	2.7	2.07	1.93	1.4	2.26	2.88	1.4	1.57	2.35	2.46	2.37	1.79	2.69	2.02	2.21	2.76	4.57	5.8	4.21	4.83	4.13	3.56	4.48	4.18	4.43	4.9	3.63	4.71	3.69	4.94	5.73	4.71	4.76	4.74	3.29	2.78	3.66	2.57	3.31	3.7	4.18	3.96	2.88	3.76	3.48
8430431K14Rik	NR_002849	0	0	0.03	0	0.04	0.02	0	0.03	0.03	0	0	0	0	0.04	0.08	0	0.03	0.05	0.03	0	0	0	0	0	0	0	0.05	0	0	0	0.04	0.07	0.03	0	0	0	0.03	0	0.03	0.04	0	0	0	0	0	0	0.1	0
8430436N08Rik	NR_040645	0	0	0	0	0	0	0	0	0	0	0	0.09	0	0	0	0	0	0	0	0	0	0	0	0	0	0	0	0	0	0	0	0	0	0	0.14	0	0	0	0	0.1	0	0	0.13	0	0	0	0	0
8430437L04Rik	NR_040503	0	0	0	0	0	0	0	0	0	0	0	0	0	0	0	0	0	0	0	0	0	0	0	0	0	0	0	0	0	0	0	0	0	0	0	0	0	0	0	0	0	0	0	0	0	0	0	0
9030025P20Rik	NM_001123370	13.03	9.14	14.02	14.2	17.94	17.88	14.56	12.13	12.57	12.42	11.8	16.47	17.52	11.73	13.02	11.91	12.38	16.35	14.48	5.98	8.37	5.89	9.67	8.4	7.77	6.54	14.14	7.23	7.55	5.98	8.2	8.46	8.07	6.56	7.42	6.71	8.92	8.04	14.32	13.15	12.19	12.58	12.4	10.33	10.91	13	12.09	12.52
9030204H09Rik	NR_040618	0	0	0	0	0	0	0	0	0	0	0	0	0	0	0	0	0	0	0	0	0	0	0	0	0	0	0	0	0	0	0	0	0	0	0	0	0	0	0	0	0	0	0	0	0	0	0	0
9030404E10Rik	NR_045878	0	0	0	0	0.05	0	0	0	0	0	0	0	0	0	0	0	0	0	0	0	0	0	0	0	0	0	0	0	0	0	0	0	0	0	0	0	0	0	0	0.09	0	0.08	0	0	0	0	0	0
9030612E09Rik	NR_102361	0.15	0.07	0.09	0.21	0.23	0.13	0.09	0.27	0.27	0.04	0.11	0.1	0.22	0.18	0.25	0.28	0.32	0.29	0.48	0.1	0.04	0.04	0	0.05	0.07	0.15	0.07	0.17	0	0.04	0.06	0	0.13	0.06	0.23	0	0.16	0.09	0.05	0	0	0	0.08	0	0	0	0	0
9030617O03Rik	NM_145448	1.86	1.8	1.63	1.33	1.05	1.39	0.7	1.55	1.84	1.23	1.01	1.4	1.21	1.5	1.01	1.52	1.28	1.49	1.88	2.96	2.99	3.32	2.79	3.1	1.67	2.54	4.62	2.54	2.73	2.81	3.08	3.45	3.17	3.42	3.36	2.93	3.58	3.52	5.05	4.15	3.96	3.63	4.5	4.51	3.95	4.66	4.4	4.42
9030619P08Rik	NR_108041	0	0.76	0.1	0	0	0	0	0	0.36	0.09	0	0	0	0	0	0.32	0.52	0.09	0	4.81	2.21	5.48	4.09	4.35	2.64	3.5	4.12	5.81	3.23	4.45	3.22	6.53	4.62	2.01	2.43	6.35	2.8	3.63	0.83	1.58	0.37	0.12	0.45	0.52	1.56	0.14	1.06	0.81
9030624G23Rik	NM_001256489	4.39	3.76	3.26	1.9	4.8	3.36	4.48	3.32	4.6	2.96	3.28	4.45	4.26	4.57	4.65	3.99	3.4	3.38	3.67	2.42	2.86	1.92	3.34	2.8	1.36	2.2	2.89	1.87	1.84	1.1	2.72	2.41	2.23	2.51	2.54	1.84	2.28	2.42	2.41	1.95	1.82	1.64	2.29	2.5	1.86	0.95	1.75	1.55
9030624J02Rik	NM_027815	22.57	23.45	21.39	14.88	23.72	22.48	23.76	21.81	24.22	18.66	17.65	23.21	21.81	26.67	22.51	20.7	19.88	24.71	19.51	16.36	16.47	13.37	16.74	17.12	12.31	14.76	20.36	15.84	16.54	14.74	14.97	18.32	15.47	16.86	17.79	15.59	18.24	18.01	19.3	16.95	14.48	18.31	17.87	20.9	13.96	16.27	16.97	20.42
9030625G05Rik	NR_110446	0.53	0.69	1.06	1.15	1.76	1.17	1.66	3.54	1.18	2.66	1.32	1.44	1.43	3.74	1.04	1.41	1.93	0.6	2.56	0	0.08	0	0.56	0	0	0.1	0	0	0	0	0.16	0.1	0.16	0	0	0	0	0	0.09	0	0	0	0	0.14	0	0	0	0
9130008F23Rik	NM_027834	1.63	1.1	1.46	1.63	1.95	1.67	1.67	1.3	1.76	1.43	2.61	2.16	2.16	0.8	1.09	1.27	1.62	2.26	1.4	3.41	3.25	3.89	4.14	5.44	3.64	8.61	5.3	2.64	2.52	2.71	4.05	5.45	7.91	3.4	3.36	2.78	3.93	4.68	2.58	2.02	2.85	1.92	2.48	1.65	2.81	1.86	2.02	1.86
9130011E15Rik	NM_198296	11.02	10	9.19	6.26	8.83	9.47	11.4	7.82	12.8	6.05	7.6	11.39	10.78	9.6	9.31	7.83	6.41	10.54	8.2	11.18	14.06	7.04	10.77	15.57	5.25	12.75	13.6	10.91	14.14	11.28	11.61	14.32	11.34	14.13	13.37	11.77	14.49	15.13	19.51	20.55	14.67	18.26	16.47	23.13	13.27	18.65	17.48	21.35
9130015A21Rik	NR_045050,NR_045051	0.1	0	0	0	0.12	0	0	0	0	0	0.13	0	0	0.22	0	0	0	0	0	0	0	0	0	0	0	0	0	0	0	0	0	0	0	0	0	0	0	0	0.11	0.22	0.46	0	0	0	0	0.13	0	0.19
9130015L21Rik	NR_040499	0	0	0	0	0	0	0	0	0	0	0	0	0	0	0	0	0	0	0	0	0	0	0	0	0	0	0	0	0	0	0	0	0	0	0	0	0	0	0	0	0	0	0	0	0	0	0	0
9130019O22Rik	NM_030226	3.78	2.22	4.63	2.44	3.81	4.26	4.94	3.03	3.18	2.71	3.32	4.5	4.77	2.61	2.11	2.2	2.2	4.66	4.13	1.33	1.27	1.45	1.08	1.89	1.05	3.14	2.06	1.3	1.38	1.16	1.59	2.14	2.53	1.77	1.16	1.16	1.53	1.79	3.07	2.24	2.49	1.89	2.64	1.32	2.03	1.47	2.9	2.26
9130019P16Rik	NR_033635	0.58	0.93	0.39	0.63	0.65	0.39	0.36	0.4	0.65	0.41	0.59	0.71	0.63	0.39	1.06	0.41	0.74	0.54	0.67	0.7	0.38	0.39	0.12	0.58	0.32	0.74	0.64	0.54	0.42	0.47	0.4	0.5	0.57	0.53	0.31	0.64	0.31	0.38	0.52	0.24	0.18	0.29	0.36	0.29	0.58	0.19	0.44	0.15
9130023H24Rik	NM_177001	1.68	1.53	1.49	0.91	1.51	1.32	1.68	3.03	2	2.15	1.5	2.04	1.82	4.82	1.89	2.1	2.51	1.74	3.63	1.49	1.89	1.68	1.65	2.11	0.66	1.4	3.47	2.14	1.97	1.46	1.46	1.42	1.49	1.87	2.09	1.51	1.62	1.65	2.02	2.7	2.29	2.06	2.63	3.05	1.7	2.58	2.46	2.73
9130024F11Rik	NR_024325,NR_024326	0	0	0.14	0	0.1	0.05	0.09	0.18	0.16	0.06	0.06	0.13	0.11	0.09	0.16	0.11	0	0.25	0.04	0	0.06	0.06	0.73	0.1	0.21	0.07	0.04	0.13	0.06	0.02	0.18	0.1	0.2	0.18	0.04	0.4	0.23	0.36	0.39	0.16	0.33	0.22	0.09	0.38	0.37	0.2	0.18	0.14
9130204L05Rik	NM_001101461	0.2	0	0	0	0	0	0.19	0	0.22	0.52	0	0	0	0	0	0.87	0	0	0	0	0	0	0	0.43	0	0	0	0	0	0.17	0	0	0	0	0	0	0.21	0	0	0	0.23	0	0	0	0	0	0	0
9130209A04Rik	NR_033453	0	0	0	0	0	0	0	0	0	0	0	0	0	0	0	0	0	0	0	0	0	0	0	0	0	0	0	0	0	0	0	0	0	0	0	0	0	0	0	0	0	0	0	0	0	0	0	0
9130221F21Rik	NR_046180	0.13	0.03	0	0	0.16	0.05	0.09	0.05	0.19	0.09	0.08	0.12	0.11	0	0	0	0	0.03	0.22	0.1	0.09	0.11	0	0.06	0.04	0.08	0.05	0.09	0.08	0.02	0.12	0.03	0.19	0.2	0.05	0	0.22	0.19	0.19	0.16	0	0.49	0.21	0.15	0.23	0.17	0.35	0.09
9130221H12Rik	NR_046001	3.35	3.34	3.22	4.43	6.3	5.04	4.58	5.98	4.97	5.69	3.29	5.23	4.95	5.88	4.48	4.37	3.67	4.1	5.69	4.31	4.6	5.83	4.93	5.18	4.94	7.59	6.14	6.41	4.85	5.35	6.26	5.75	6.55	5.89	5.59	3.81	6.39	4.76	7.56	7.62	5.77	5.9	7.78	6.7	5.38	6.65	8.21	7.13
9130227L01Rik	NR_045837	0	0	0	0	0	0.03	0	0	0	0	0	0	0.08	0	0	0	0	0	0	0	0	0	0	0	0	0	0	0	0	0	0	0	0	0	0	0	0	0	0	0	0	0	0	0	0	0	0.1	0
9130230L23Rik	NR_027961	37.08	22.72	34.46	36.99	24.08	39.14	31.48	28.07	33.79	23.65	26.84	35.41	46.35	17.29	19.94	18.16	17.21	35.78	47.26	24.74	25.71	27.48	27.88	29.17	23.73	28.49	48.03	24.42	25.05	27.68	32.03	27.03	33.83	30.42	24.63	23.23	31.66	27.21	89.69	88.93	81.45	85.61	81.42	79.03	86.41	88.55	85.39	93.95
9130401M01Rik	NM_029418	20.31	20.81	21.24	23.36	22.26	18.55	22.78	25.36	22.25	20.69	19.64	20.66	21.63	22.53	24.99	24.83	24.97	22.1	22.92	21.26	23.25	21.79	20.9	21.64	27.12	17.8	26.05	22.16	20.63	23.08	20.18	22.61	20.24	24.2	20.74	24.92	21.26	23.88	22.76	22.21	24.53	25.1	22.93	22.9	24.53	23.18	24.22	20.82
9130409I23Rik	NM_001033819	0	0	0	0	0	0	0.04	0	0	0	0	0.05	0	0	0	0	0	0	0	0	0	0.04	0	0	0.07	0	0	0	0	0	0	0	0.04	0	0	0	0	0.14	0.05	0	0	0	0	0	0.1	0	0.05	0
9230009I02Rik	NR_045865	2.56	2.41	4.58	3.81	1.76	3.91	3.16	3.01	2.49	2.82	3.16	3.81	3.52	2.23	1.36	1.74	0.53	2.72	3.98	0	0	0	0	0.09	0	0.08	0.24	0	0	0	0	0	0	0	0	0	0.09	0	0	0.36	0.36	0	0.12	0.13	0.16	0.31	0.17	0.15
9230102K24Rik	NR_028438	1.27	1.79	0.58	2.74	2.46	1.11	1.98	0.84	2.73	0.48	1.83	2.43	1.89	3.32	1.74	1.02	1.13	0.83	0.95	0.14	0.25	0.06	0	0.15	0.1	0.07	0.11	0.06	0.09	0	0.22	0.15	0.13	0.17	0.22	0.21	0.23	0.2	0	0	0	0	0	0	0	0	0	0
9230102O04Rik	NR_040511	5.61	6.19	6.29	4.14	8.8	5.7	4.81	9.77	5.81	4.53	6.26	3.28	7.01	9.39	8.08	7.74	11.31	4.61	6.15	42.65	32.01	39.85	46.6	37.18	33.5	35.33	21.38	43.74	38.58	32.99	33.76	26.33	39.86	38.19	30.26	39.88	32.4	27.69	4.82	3.37	3.23	3.79	4.36	3.9	3.65	5.23	3.17	4.06
9230104L09Rik	NM_029960	8091.93	7095.48	7453.23	9789.15	9469.82	5464.69	8530.67	9946.1	8719.73	10031.4	8247.6	8735.36	7560.98	13586.8	14113.9	9305.99	12238.2	6819.92	6722.26	8.1	8.55	5.91	4.39	64.58	33.66	11.68	184.39	67.81	4.3	3.38	85.64	17.96	17.98	27.44	1.39	4.05	116.01	12.43	1.88	4.19	5.46	7.79	4.65	6.97	5.35	4.89	4.05	4.59
9230105E05Rik	NR_040626	14.81	13.1	14	19.82	18.51	8.88	17.24	21.51	18.13	18.3	15.14	15.01	11.94	24.77	23.23	13.07	20.41	11.96	13.43	0.27	0.18	0.14	0.12	0.26	0.21	0.33	0.66	0.19	0.23	0.13	0.34	0.17	0.32	0.25	0.06	0.08	0.43	0.19	0.1	0.2	0.13	0.06	0.15	0.12	0.41	0.35	0.28	0.3
9230110C19Rik	NM_199017	5.48	3	3.21	3.22	3.76	3.98	3.63	4.11	3.36	3.53	3.83	3.82	4.49	2.76	2.38	3.14	3.78	4.06	6.04	3.56	3.73	3.16	2.18	4.86	2.25	4.41	4.79	3.6	3.24	2.76	3.75	4.54	3.65	3.59	4.79	4.14	2.81	3.99	7.49	5.38	6.93	7.39	6.85	6.16	7.4	7.48	6.38	6.9
9230110F15Rik	NM_029863	1498.63	1218.28	1093.79	1152.96	1445.71	878.4	1599.7	1810.24	1722.67	1443.02	1325.48	1621.64	1085.28	2106.19	2597.69	1282.01	1741.94	1096.2	878.75	1.05	1.28	0.32	0.22	9.34	3.74	1.55	27.23	8.91	0.8	0.47	8.53	3.6	2.74	3.67	0	0.33	15.87	1.34	0	0.27	0.18	1.65	0.58	0.74	0.17	0.74	0.17	0.45
9230112D13Rik	NM_030062	0	0.28	0	0	0.08	0.08	0	0.1	0.13	0	0.09	0.4	0	0	0	0	0.23	0	0	3.99	6.29	3.67	5.55	5.87	2.76	10.55	2.56	3.94	5.53	6.65	5.06	3.69	5.58	6.96	7.13	5.57	7.37	3.68	0.79	1.75	0.41	0.7	1.38	1.93	1.61	0.47	0.78	0.68
9230112J17Rik	NR_040463,NR_040464	1.36	0.72	0.49	1.76	0.34	0.5	0.17	0.46	1.18	0.41	0.26	0.46	1.03	0.13	0.1	0.49	0.49	0.67	1.42	0	0	0.07	0	0	0.16	0	0.05	0.07	0	0.1	0.02	0.04	0.04	0.14	0	0.04	0	0.07	2.94	3.1	3.5	1.18	2.49	2.5	0.65	1.34	2.42	3.86
9230114K14Rik	NR_015537	0.89	0.69	0.5	0.83	0.56	0.56	0.42	0.44	0.85	0.47	0.41	0.78	0.73	1.03	0.39	0.62	0.6	0.76	0.51	1.25	0.79	1.25	0.29	1.1	0.18	1.12	1.34	0.83	0.95	0.57	0.81	1.37	0.89	1.1	1.61	0.99	0.88	1.65	0.74	0.87	0.48	0.37	0.74	1.08	1.05	1.79	1.37	0.95
9230116L04Rik	NR_110486	1.16	1.36	1.17	0.75	0.98	0.98	0.54	0.55	0.26	0.79	0.9	0.62	0.97	0.76	0.98	0.49	0.33	0.83	0.73	1.41	0.83	0.44	0.92	0.93	0.08	0.46	0.69	0.84	0.28	0.1	0.81	1	0.68	0.66	0.54	0.64	0.25	0.67	1.56	1.29	1.36	0.7	1.05	0.73	0.36	0.68	0.62	0.75
9230116N13Rik	NR_024328	1.2	1.57	1.11	0.47	0.92	1.1	0.8	0.97	0.95	1.03	0.68	1.21	0.69	0.41	0.62	0.93	1.02	0.91	1.36	3.4	2.93	2.8	3.44	3.17	2.63	2.71	3.53	2.98	2.97	3.63	2.84	2.71	3.35	2.86	2.85	1.82	3.04	2.8	2.71	2.85	2.72	2.91	2.54	2.2	2.47	3.03	2.03	2.32
9330020H09Rik	NR_028442	1.04	0.99	1.27	2.32	1.29	1.23	0.9	1.27	1.01	1.44	1.13	1.31	1.72	1.6	1.16	1.28	1.38	1.36	2.29	2.15	2.24	2.56	2.38	1.91	1.97	1.99	1.98	2.55	1.32	2.15	1.92	1.58	1.73	2.28	1.32	2.24	1.42	1.38	1.92	2.54	1.72	1.23	2.18	1.77	2.04	1.64	1.76	1.4
9330102E08Rik	NR_077223	0.63	0.65	0.34	0.45	0.7	0.7	0.62	0.59	0.9	0.91	0.55	0.82	1.63	0.67	0.76	0.4	0.59	0.68	0.82	0.23	0.41	0.32	0.54	0.35	0.29	0.3	0.45	0.12	0.54	0.44	0.5	0.52	0.61	0.77	0.55	0.49	0.55	0.51	1.43	1.46	0.93	1.09	0.78	2.27	0.69	1.28	0.92	1.63
9330111N05Rik	NR_015587	0	0.1	0	0	0	0	0.06	0	0	0	0	0	0	0	0	0	0	0	0	0.07	0.06	0.06	0	0.07	0	0	0	0	0.08	0	0	0	0	0	0	0	0.07	0	0	0	0	0.24	0.07	0	0.07	0	0	0
9330117O12Rik	NR_045400	0	0	0	0	0	0	0	0	0	0	0	0	0.04	0	0	0	0	0	0	0	0	0	0	0	0	0	0	0	0	0	0	0	0	0	0	0	0	0	0	0	0	0	0	0	0	0	0	0
9330133O14Rik	NR_045696	5.08	3.69	4.5	3.39	5.41	5.77	4.64	6.3	5.04	3.05	3.67	5.07	5.21	7	3.48	3.86	2.59	5.79	7.18	7.76	7.7	4.77	5.77	9.33	4.24	7.88	8.49	7.48	9.59	6.75	7.47	8.1	6.33	8.59	8.52	7.4	9.52	7.48	5.66	5.25	4.94	4.62	5.45	5.78	4.37	5.59	6.25	4.3
9330151L19Rik	NR_033222	4.86	4.47	5.88	7.56	7.94	6.36	6.68	6.9	7.08	4.15	6.12	7.19	8.04	8.97	6.29	5.86	5.61	6.65	7.33	4.67	5.77	3.83	3.45	5.9	2.62	5.54	8.55	5.14	5.54	5.13	5.7	4.64	5.73	4.45	6.11	3.94	6.5	4.99	7.16	8.26	7.35	5.85	6.25	7.3	5.91	6.58	7.68	7.76
9330158H04Rik	NR_015589	0.09	0.12	0.05	0	0.02	0	0	0	0.03	0.02	0.02	0	0.05	0	0.04	0.05	0	0.05	0.11	0.06	0	0.06	0.22	0	0.08	0.06	0.04	0	0.04	0	0.02	0	0.05	0	0.05	0.06	0.12	0.08	0	0	0.03	0	0	0	0	0.04	0.06	0
9330159F19Rik	NM_001162537	7.56	7.31	6.71	6.2	9.7	4.66	7.81	6.49	10.82	5.34	6.58	6.79	7.62	14.13	9.89	5.79	7.87	5.52	3.63	2.33	2.54	1.24	1.92	2.16	1.1	1.79	2.6	1.42	2.87	2.45	1.84	1.25	2.14	2.18	2.08	2.08	1.77	2.02	1.73	1.74	1.28	1.41	1.12	2.19	1.81	1.57	1.18	1.75
9330159M07Rik	NR_037982,NR_037983	0.19	0.16	0.19	0	0.23	0.09	0.06	0.13	0.04	0.14	0.13	0.21	0.2	0.16	0.17	0.19	0.1	0.17	0	0.03	0.06	0.15	0.57	0.21	0.08	0.03	0.16	0.15	0.17	0.22	0.2	0.11	0.15	0.33	0.1	0.03	0.04	0.03	0.11	0.12	0	0.02	0.1	0.1	0.03	0	0.18	0.12
9330162012Rik	NR_102323	9.85	10	7.96	12.03	9.28	9.63	10.93	9.2	10.86	7.84	7.74	9.85	11.33	10.99	9.75	7.1	8.2	11.58	11.46	24.24	25.45	16.1	18.94	25.56	14.99	18.91	20.1	21.21	24.13	22.39	20.23	23.63	19.84	24.08	26.89	23.12	26.07	22.87	11.65	8.96	6.26	7.57	8.71	11.2	6.7	8.38	11	7.5
9330162B11Rik	NR_038007	0	0	0	0	0	0	0	0	0	0	0	0	0	0	0	0	0	0	0	0	0	0	0	0	0	0	0	0	0	0	0	0	0	0	0.13	0	0	0	0	0	0	0	0	0	0	0	0	0
9330175E14Rik	NR_015514	0	0	0	0	0.04	0	0.06	0.05	0	0	0	0.13	0	0.07	0	0	0	0	0	0	0	0	0	0.06	0	0	0	0.05	0	0	0.04	0	0	0	0	0	0	0	0	0	0	0	0	0	0	0	0	0
9330175M20Rik	NR_045151	0	0	0	0	0	0	0	0	0	0	0	0	0	0	0	0	0	0	0.03	0	0	0	0	0	0	0	0	0	0	0	0.04	0	0	0.04	0	0	0	0.03	0.04	0	0	0	0.04	0	0.04	0.05	0	0
9330178D15Rik	NR_040553	0	0	0	0	0	0	0	0	0	0	0	0	0	0	0	0	0	0	0	0	0	0	0	0	0	0	0	0	0	0	0	0	0	0	0	0	0	0	0	0	0	0	0	0	0	0	0	0
9330179D12Rik	NR_040273,NR_040274,NR_040275	0.21	0.65	0.46	0.75	0.4	0.19	0.39	0.23	0.37	0.5	0.31	0.63	0.34	0.34	0.46	0.82	0.8	0.42	0.38	0.95	1.29	1.57	0.55	0.91	2.09	0.93	1.37	1.63	1.13	0.94	1.53	1.21	0.44	0.69	1.55	1.5	1.02	1.68	0.99	0.47	0.32	0.96	1.32	0.89	0.94	0.32	0.18	0.65
9330182L06Rik	NM_172706	1.71	1.19	1.17	2.26	2.7	1.14	2.46	1.32	3.05	1.12	1.78	2.39	1.64	3.7	3.69	1.67	1.49	1.8	0.77	0.08	0.12	0.1	0.3	0.14	0	0.15	0.11	0.07	0.09	0.13	0.24	0.12	0.1	0.07	0	0.04	0.25	0.13	0.04	0.09	0.02	0.02	0.02	0.03	0.02	0.1	0.08	0.14
9330182O14Rik	NM_001256056	0	0	0	0	0	0	0	0	0	0	0.03	0	0.08	0	0	0	0	0	0	0	0	0	0	0	0	0	0	0	0	0	0	0	0	0	0	0	0	0	0	0	0.05	0	0	0	0	0	0.05	0
9330188P03Rik	NR_102319	0.17	0.13	0	0.92	0.29	0.17	0.08	0.07	0.19	0	0.25	0.09	0.31	0.41	0	0.12	0.24	0.15	0.08	0	0.08	0	0	0	0	0	0.13	0	0	0.07	0	0	0	0	0	0	0	0	0	0	0	0	0	0	0	0	0	0
9430007A20Rik	NM_198662	0	0	0	0	0	0	0	0	0	0	0	0	0	0	0	0	0	0	0	0	0	0.06	0	0	0	0	0	0	0	0	0	0	0	0	0	0	0	0	0	0	0	0	0	0	0	0	0	0
9430008C03Rik	NR_015463,NR_027887	1.95	2.03	2.47	2.75	3.7	3.14	3.39	4.85	2.59	3.13	2.82	3.68	3.55	6.6	1.92	3.66	2.92	2.76	5.68	1.81	2.43	1.75	2.3	2.72	2.14	3.47	6.17	2.08	2.52	2.96	2.51	2.67	3	2.11	3.17	3.31	2.75	2.47	1.46	2	1.38	1.2	1.45	1.88	1.58	2.05	1.07	1.83
9430014N10Rik	NR_045737	0	0	0	0	0	0	0	0	0.09	0.28	0.06	0	0.51	0.1	0	0	0.31	0.07	0	0	0	0	0	0	0	0	0	0	0	0	0	0	0	0	0	0	0	0	0	0	0	0	0	0.13	0	0	0.09	0.15
9430015G10Rik	NM_145557,NM_177205	5.73	4.46	5.2	6.69	6.98	5.9	8.54	7.57	6.62	5.96	4.77	6.58	9.06	8.37	5.31	6.11	6.19	6.87	8.46	4.52	5.44	3.64	3.68	6.45	4.22	8.18	7.79	3.78	4.94	6.14	5.44	6.2	7.49	5.66	4.97	5.28	6.01	5.57	8.46	8.33	7.98	9.48	7.77	8.89	7.19	9.59	7.75	10.1
9430016H08Rik	NM_001081181	17.26	19.57	16.31	13.17	15.7	13.84	14.96	20.87	16.66	20.94	14.29	18.06	16.33	19.35	17.89	20.4	17.84	16.04	17.81	16.95	15.9	16.6	17.84	14.73	14.35	11.77	18.76	17.74	17.37	17.68	13.8	15.41	14.16	18.61	17.51	17.64	15.14	14.68	17.37	17.99	16.34	19.88	16.97	19.96	15.88	21.52	15.73	16.31
9430018G01Rik	NR_045988	0	0	0	0	0	0.01	0.04	0	0	0	0.03	0.02	0.04	0.03	0	0	0.04	0	0.04	0	0	0	0	0	0	0	0	0.02	0	0.05	0	0	0	0	0	0	0.02	0	0	0.03	0	0	0	0	0	0	0	0
9430019J16Rik	NR_040635	0	0	0	0	0	0	0	0	0	0	0	0	0	0	0	0	0	0	0	0	0	0	0	0	0	0	0	0	0	0	0	0	0	0	0	0	0	0	0	0	0	0	0	0	0	0	0	0
9430020K01Rik	NM_001081963	6.8	9.25	6.44	6.86	8.07	6.69	11.96	9.66	9.81	7.12	5.79	8.64	8.12	15.53	12.73	7.99	7.63	8.91	8.34	4.38	7.36	3.74	5.44	3.92	1.93	4.05	5.93	3.61	7.49	5	4.36	3.09	4.18	3.84	6.14	5.35	5.31	5.71	4.25	7.67	3.94	6.09	3.89	8.92	4.45	6.21	4.71	11.43
9430021M05Rik	NR_033569	0.04	0.03	0	0	0.03	0.03	0.08	0.17	0.09	0.11	0.06	0.09	0	0.05	0	0	0	0	0.08	0	0.04	0	0	0.05	0	0	0	0.04	0	0	0.03	0.04	0	0	0	0	0	0	0.05	0	0	0	0.13	0.07	0	0	0.09	0.08
9430037G07Rik	NR_040766	0.17	0.17	0.08	0	0.21	0.15	0.21	0.25	0.21	0.31	0.05	0.33	0.2	0.27	0.15	0.65	0.13	0.12	0.31	0.2	0.32	0.16	0.18	0.18	0.04	0.09	0.25	0.12	0.12	0.05	0.22	0.17	0.26	0.17	0.27	0.45	0.42	0.08	0.15	0.12	0.22	0.18	0.13	0.22	0.17	0.04	0.21	0.16
9430038I01Rik	NM_029886	5.98	7.27	6.43	3.37	7.42	5.69	6.09	4.92	4.01	7.68	5.37	6.74	6.25	6.36	7.53	8.3	6.19	6.69	5.71	8.23	8.61	8.86	7.3	10.15	7.89	8.06	9.61	8.54	9.1	8.91	9.47	10	9.76	7.85	9.36	8.56	8.5	9.42	7.63	6.79	7.12	8.82	6.78	6.52	5.36	7.93	7.22	7.16
9430041J12Rik	NR_033568	0.12	0.12	0	0	0.13	0.08	0.07	0	0.09	0.03	0	0	0.07	0	0	0	0.04	0.07	0.07	0	0.03	0.2	0	0.04	0	0	0.58	0	0	0.03	0.24	0.08	0.04	0	0.06	0	0	0	1.65	1.54	1.31	0.91	1.29	1.6	1.51	1.33	0.55	1.73
9430060I03Rik	NR_015525	0.17	0.35	0.11	0.27	0.63	0.14	0.32	0.73	0.19	0.15	0.09	0.12	0.2	0.28	0.31	0.25	0.22	0.29	0.36	0.36	0.25	0.05	0	0.27	0.24	0.23	0.35	0.36	0.66	0.19	0.29	0.12	0.31	0.44	0.09	0.3	0.56	0.22	0.13	0.26	0.13	0.09	0.22	0.09	0	0.31	0.19	0.11
9430069I07Rik	NM_001256161	0	0	0	0	0	0	0	0	0	0	0	0	0	0	0	0	0	0	0.15	0	0	0	0	0	0.24	0	0	0	0	0	0	0	0	0	0	0	0	0	0	0	0	0	0.44	0	0	0	0	0
9430076C15Rik	NR_015553	0.15	0.09	0.08	0.32	0.12	0.06	0.25	0.09	0.1	0	0.11	0.22	0.32	0.21	0.15	0.04	0.08	0.1	0.08	0.15	0.05	0.03	0.15	0.1	0.08	0.3	0.18	0.08	0.04	0.02	0.09	0.06	0.21	0.07	0.05	0.03	0.06	0.26	0.06	0	0	0	0	0.09	0.03	0.04	0.06	0.05
9430083A17Rik	NR_029463	1.86	1.4	1.76	1.11	1.68	1.22	1.37	2.53	2.07	1.62	1.12	1.32	1.74	2.06	1.17	1.95	1.31	1.34	3.85	1.27	1.03	1.06	0.81	0.84	0.8	0.94	2.01	1.92	1.28	1.12	0.76	0.93	0.95	0.92	1.81	1.09	0.45	1.24	1.34	2	1.44	1.28	1.36	1.28	1.31	1.27	1.17	1.05
9430091E24Rik	NR_040363,NR_040364	0.6	0.5	0.82	0.61	1.21	0.51	0.85	0.62	0.79	0.55	0.74	0.91	0.91	1.05	0.92	0.56	0.48	0.84	1.02	1.1	1.35	0.91	1.42	1.15	0.59	0.82	1.21	0.74	1.09	0.83	1.2	0.73	0.93	1.13	0.63	0.78	1.55	0.92	1	0.92	0.91	1.42	1.09	1.18	1.18	1.76	1.33	1.24
9530002B09Rik	NM_023865	0	0	0	0	0.78	0.3	0	0.27	0	0	5.58	0	0	0	0	0	0	0	0.1	0	0	0	0	0.25	0	0	0	0	0	0	2.73	0.12	0	0	0	0	0	0	0	0	0	0	0	0	0	0	0	0
9530003J23Rik	NM_029906	0	0	0	0	195.95	52.66	4.03	54.17	0	0	726.19	2.93	3.44	2.37	0	0	0	3.65	11.31	0.23	0	0	0	30.35	6.61	200.18	1.7	0	0	0	30.94	1.3	2.21	0	0	0	19.01	3.22	0	0	0	0	0	0	0	0	0.08	0
9530026F06Rik	NR_040483	0	0.21	0	0	0	0	0	0	0	0	0	0	0	0.26	0.27	0	0.2	0	0	0	0	0	0.44	0	0	0	0	0.08	0	0	0	0.11	0.19	0.11	0	0	0	0	0	0	0.12	0	0	0	0	0	0	0
9530026P05Rik	NR_015530	1.96	1.15	0.95	3.63	1.67	1.73	2.2	1.42	1.14	1.44	1.53	2.02	2.18	1.24	1.7	1.89	1.5	2.22	1.52	0.75	0.9	0.81	0.59	0.6	0.4	1.34	0.7	0.56	1.04	0.62	1.26	0.71	0.77	0.8	0.89	1.31	0.2	0.45	0.5	0.94	0.95	0.84	1.02	0.3	0.86	0.37	1.6	0.52
9530027J09Rik	NR_045916	0	0	0.06	0	0.27	0.04	0.12	0	0.14	0.16	0.14	0	0.28	0.15	0	0	0	0.11	0.11	0	0.22	0.05	0	0.21	0.09	0.32	0.48	0.11	0.08	0.37	0.31	0.27	0.17	0.08	0	0.06	0.35	0.06	0.27	0.15	0.13	0.03	0.13	0.19	0.39	0.35	0.07	0.11
9530036O11Rik	NR_015562	0.03	0.12	0.08	0.27	0.06	0.12	0.23	0.07	0.03	0.21	0.11	0.13	0.05	0.26	0	0.04	0.12	0.16	0.08	0.44	0.43	0.32	0.52	0.5	0.21	0.56	0.36	0.43	0.19	0.31	0.39	0.33	0.36	0.42	0.34	0.34	0.62	0.35	0.27	0.28	0.17	0.5	0.32	0.1	0.41	0.24	0.46	0.23
9530051G07Rik	NR_040272	0.5	0.58	0.54	1.01	0.75	0.51	0.79	0.53	0.58	0.41	0.54	0.39	0.54	0.78	0.6	0.32	0.55	0.66	0.6	0.22	0.46	0.28	0.13	0.37	0.11	0.28	0.18	0.26	0.17	0.1	0.43	0.21	0.26	0.32	0.35	0.49	0.56	0.25	1.07	0.66	0.68	1.01	0.85	0.67	0.62	1.14	1.15	1.01
9530052E02Rik	NR_046017	0.39	0	0.18	0	0.14	0.06	0	0.16	0	0	0	0.21	0.18	0.24	0	0	0.83	0.08	0.26	0	0	0.09	0	0	0	0.2	0	0	0	0	0.12	0.11	0.09	0.12	0	0.2	0.11	0.19	0	0.33	0	0	0.36	0	0	0	0.11	0.18
9530053A07Rik	NM_001164655	0.13	0.17	0.18	0.12	3.96	2.02	1.31	4.14	0.12	0.11	25.98	1.3	0.21	0.55	0.23	0.24	0.13	0.27	1.56	0.34	0.12	0.25	0.69	0.6	0.88	0.89	0.18	0.23	0.39	0.16	12.86	0.61	0.3	0.19	0.21	0.42	0.15	0.45	0	0.03	0	0.02	0.01	0.04	0	0	0.03	0.06
9530059O14Rik	NR_015610	0.04	0.02	0.04	0	0.11	0	0.1	0.02	0	0.06	0.08	0.05	0.04	0.05	0	0.06	0	0.04	0.04	0	0	0	0	0	0	0	0	0	0	0	0	0	0	0	0	0	0	0	0	0	0	0	0	0	0	0	0	0
9530068E07Rik	NM_153117	127.93	141.9	116.23	126.2	120.76	108.92	124.71	102.87	150.75	133.23	88.66	119.97	108.28	120.75	123.05	142.6	120.04	127.05	113.11	123.01	130	121.04	127.29	122.61	99.62	110.53	125.95	125.5	143.55	117.65	121.22	115	121.22	129.92	130.94	129.59	126.12	131.88	160.98	171.14	148.08	151.88	150.43	184.09	135.24	152.18	165.48	189.39
9530077C05Rik	NM_026739	1.42	3.2	1.65	1.45	1.35	1.45	1.79	1.47	1.39	3.01	1.4	1.44	3.99	1.86	1.36	3.21	2.13	1.59	2.15	3.88	2.29	4.83	4	2.07	3.64	3.42	2.06	5.03	2.37	2.71	2.72	2.15	3.5	3.25	1.32	2.49	2.1	1.98	1.04	1.17	1.59	0.68	0.92	1.59	1.83	1.26	1.39	1.24
9530080O11Rik	NR_045776,NR_045777	1.04	0.95	1.05	1.83	1.38	1.08	1.18	0.6	1.11	1.48	0.9	0.73	0.71	0.66	0.74	0.62	0.75	1.02	0.72	0.95	0.48	0.33	0	0.13	0	0.55	0.37	0.56	1.1	0.97	0.51	0.5	0.61	1.04	1.17	1.24	1.56	0.56	0.8	0.86	1.12	1.3	1.19	1.42	1.06	0.6	0.78	0.86
9530082P21Rik	NR_015472	6.91	6.04	6.35	10.06	8.82	9.02	8.4	9.9	8.66	9.97	6.7	7.42	10.59	8.88	7.35	10.6	8.33	10.48	9.71	11.05	13.36	9.97	12.33	13.49	15.45	15.7	15.86	13.44	15.61	16.5	13.69	12.51	16.01	12.38	15.04	12.19	13.9	10.72	11.1	10.77	8.29	11.29	10.37	10.01	9.08	11.71	11.78	12.16
9530091C08Rik	NR_033299	0.44	0.34	0.23	0.3	0.37	0.29	0.33	0.44	0.49	0.33	0.37	0.3	0.37	0.64	0.38	0.59	0.29	0.31	0.68	0.36	0.3	0.19	0.44	0.57	0.19	0.44	0.77	0.31	0.33	0.42	0.39	0.32	0.55	0.39	0.32	0.2	0.8	0.22	0.7	0.72	0.32	0.4	0.67	0.59	0.48	0.88	0.43	0.36
9630001P10Rik	NR_102378	0.53	0.16	0.42	0.62	0.55	0.48	0.3	0.68	0.62	0.56	0.29	0.37	0.29	0.53	0.73	0.28	0.2	0.42	0.73	0.46	0.81	0.7	0.23	0.64	0.49	0.64	1.48	0.54	0.47	0.46	0.62	0.73	0.45	0.57	0.51	0.14	0.58	0.75	3.87	4.45	3.98	3.55	4.19	4.14	3.56	4.88	3.22	3.64
9630013A20Rik	NR_015539	0	0	0	0	0	0	0	0	0	0	0	0	0	0	0	0	0	0	0.04	0	0	0	0	0	0	0.09	0	0	0	0	0	0	0.04	0	0	0	0	0	0	0	0	0	0	0	0.04	0	0	0
9630028B13Rik	NR_038006	0	0	0	0	0	0	0	0.02	0	0	0.04	0	0	0.03	0	0	0	0	0.05	0	0	0.02	0	0	0	0	0.04	0.02	0.03	0	0	0	0.02	0	0	0	0	0	0.03	0	0	0	0.01	0	0	0.03	0	0
9630028H03Rik	NR_015544	0	0	0.14	0	0	0	0.07	0	0	0	0.06	0	0.04	0	0.1	0	0	0.07	0	0.04	0	0.03	0	0	0.06	0	0	0.03	0	0	0	0	0	0	0	0	0	0	0	0	0	0	0	0	0	0	0	0
9630033F20Rik	NM_177003	2.1	3.14	1.93	1.75	3	2.41	2.86	2.94	3.12	2.24	1.98	2.96	2.94	3.88	2.71	2.44	2.75	2.55	3.25	6.27	6.64	5.1	5.53	7.49	4.38	7.74	5.31	5	7.16	4.74	7.59	7.88	7.81	6.88	7.51	5.43	7.42	7.46	5.76	4.43	3.52	5.27	4.55	5.79	4.66	4.53	4.72	4.8
9830107B12Rik	NM_001177896,NM_001177897,NM_177824	0.02	0.15	0	0	0	0.02	0.05	0	0.25	0.04	0.02	0	0	0.03	0.06	0.13	0.14	0	0.02	0.06	0.36	0.18	0.25	0.06	0.2	0.08	0.25	0.05	0.14	0.19	0.1	0.11	0.15	0	0.19	0.18	0.11	0.15	0.05	0.18	0.04	0.05	0.12	0.11	0.13	0	0.05	0.15
9830132P13Rik	NR_040552	0.03	0.03	0.04	0	0	0.01	0.02	0.03	0.02	0	0.02	0	0	0.05	0.03	0	0.02	0	0.02	0.04	0	0.01	0.23	0	0	0	0.03	0.04	0.05	0.02	0.11	0.06	0	0.07	0.1	0.07	0.02	0.07	0.02	0.04	0.02	0	0.09	0.1	0.07	0.06	0.08	0
9830147E19Rik	NM_001242388	2.02	1.17	1.22	1.11	1.3	1.69	1.48	1.6	1.91	0.85	1.12	1.74	1.92	1.48	1.19	1.46	0.84	1.77	1.63	1.2	0.97	0.89	0.51	1.34	0.34	1.6	2	0.9	1.1	1.06	1.24	1.06	1.23	1.44	1.54	1.1	1.37	1.26	1.45	1.81	1.12	0.69	1.2	1.8	1.1	1.61	1.12	2.11
9830166K06Rik	NR_045314	0	0	0	0	0	0.06	0.03	0	0	0.03	0	0.04	0	0	0	0	0	0	0	0	0.03	0	0.14	0.07	0	0.2	0.1	0.06	0	0.05	0	0	0.12	0	0	0.03	0.03	0.06	0.04	0	0	0	0.02	0	0	0	0	0
9930012K11Rik	NM_001004155,NM_001112735	0.32	0.67	0.25	0.2	0.72	0.24	0.42	1.05	0.86	1.13	0.37	0.29	0.65	1.48	0.24	0.4	0.56	0.62	1.28	1.06	1.01	0.79	0.35	0.98	0.71	2.21	1.09	0.71	0.78	0.87	0.81	1.17	1.58	1.12	0.86	0.6	0.97	0.93	0.4	0.77	0.66	0.46	0.31	0.79	0.51	0.42	0.78	0.68
9930014A18Rik	NR_030696	3.47	4.83	3.04	1.98	4	3.08	4.94	4.66	4.65	3.44	2.69	4.51	3.79	6.78	6.51	3.62	3.56	3.56	4.36	1.16	1.6	0.8	2.18	1.13	0.65	1.54	3.4	1.16	1.56	1.14	1.11	1.29	1.28	1.37	1.85	1.42	1.52	1.39	1.59	1.27	0.89	1.61	1.34	1.63	0.88	1.3	2	1.46
9930021J03Rik	NM_172836	8.83	5.97	8.6	5.12	9.27	8.67	13.31	4.09	9.93	5.06	8.67	12.12	13.9	7.25	8.86	5.51	4.7	12.14	4.85	5.52	5.15	2.87	3.5	10.3	1.71	11.31	6.74	3.94	5.2	4.34	7.47	10.41	9.49	6.39	7.11	4.98	8.12	9.09	14.43	9.33	7.39	7.75	9.18	13.12	8.22	8.98	11.03	11.09
9930104L06Rik	NM_177573	2.86	2.4	2.27	2.78	2.36	2.85	2.18	2.72	2.9	2.27	2.24	2.74	2.52	2.82	2.5	1.94	1.79	2.11	3.06	2.3	2.61	2.26	2.33	2.42	2.05	2.67	3.4	2.32	2.1	3.04	2.79	2.24	3.05	2.74	2.45	2.49	3.13	2.61	2.51	2.68	2.35	2.86	2.39	2.07	2.27	3.08	2.49	1.98
9930111H07Rik	NR_108086	0	0	0.23	0	0	0	0	0	0.22	0	0	0	0	0	0.45	0	0	0	0.1	0.12	0	0.2	0	0	0	0	0	0	0	0	0	0	0	0.14	0	0	0	0	0.12	0.38	0	0	0	0	0	0	0	0.21
9930111J21Rik1	NM_001114679	0.48	0.37	0.48	0	0.51	0.45	1.12	0.33	0.7	0.43	0.59	0.54	0.68	1.69	0.72	0.54	0.26	0.88	0.95	0.09	0.59	0.19	0.09	0.39	0.03	0.59	1.63	0.22	0.56	0.18	0.42	0.44	0.48	0.26	0.85	0.37	0.45	1	0.22	0.25	0.23	0.01	0.29	0.61	0.12	0.18	0.12	0.77
9930111J21Rik2	NM_173434,NM_173434_chr11:49037659_49051242	0.1	0	0	0	0	0	0	0.07	0	0.06	0.08	0.15	0	0.25	0.1	0	0	0	0.29	0.29	0.07	0.11	0.39	0.2	0.05	0.06	0.51	0.06	0.07	0.08	0	0	0	0.1	0.09	0.25	0.17	0.06	0.07	0.15	0	0.42	0	0.16	0	0	0	0.46
a	NM_015770	0	0	0	0	0	0	0	0.11	0	0	0	0	0	0	0	0	0	0	0.12	0	0	0	0.19	0	0	0	0	0	0	0	0.08	0	0	0	0	0.14	0.15	0.14	0	0	0	0	0	0	0	0	0	0
A130010J15Rik	NM_001160359,NM_001160360,NM_181048	4.74	3.6	3.67	2.83	3.73	4.54	5.24	4.22	5.19	2.6	4.01	5.88	5.26	4.99	4.32	2.29	2.99	5.32	4.24	7.65	8.25	4.97	5.79	10.01	3.99	10.8	6	6.48	7.17	5.12	8.83	10	9.56	8.72	8.71	6.42	8.34	9.22	8.96	7.37	6.14	6.84	7.42	9.18	8.28	7.52	8.45	8.48
A130077B15Rik	NR_040616	33.05	24.87	25.91	20.9	42.91	37.92	45.35	34.58	31.75	21.67	26.85	45.99	55.08	53.53	31.05	23.54	20.97	41.57	40.79	26.67	32.07	18.86	24.46	45.16	25.44	89.01	58.92	25.67	30.45	26.71	41.82	50.92	66.06	31.39	35.71	29.46	57.24	41.57	50.93	53.65	26.09	37.09	37.8	42.78	34.14	39.66	36.74	40.68
A1bg	NM_001081067	0.05	0.04	0	0	0	0	0	0.04	0	0	0	0.11	0.09	0	0	0	0	0	0.04	0	0	0	0	0.11	0	0	0	0	0	0	0	0	0	0	0	0.05	0	0	0	0.06	0.06	0	0.08	0.08	0.1	0	0.05	0.09
A1cf	NM_001081074	0.47	0.09	0.17	0	0.21	0.11	0.19	0.19	0.16	0.06	0.24	0.25	0.27	0.11	0.27	0.07	0.07	0.31	0.17	0	0	0	0	0	0	0.02	0	0	0	0	0.01	0	0	0.03	0	0	0	0	0	0.03	0	0	0	0	0	0	0	0
A230001M10Rik	NR_040391	0.05	0.04	0	0	0	0	0	0	0	0	0	0	0	0	0	0	0	0	0	0	0	0	0	0	0	0	0	0	0	0.04	0	0	0	0	0.08	0	0	0	0	0	0	0	0	0	0	0	0	0
A230009B12Rik	NR_077237,NR_077238,NR_077239	0	0	0	0	0	0	0	0	0	0	0	0	0	0	0	0	0	0	0	0	0	0	0.14	0.05	0	0.05	0	0	0	0.04	0.09	0	0.04	0	0	0	0	0.12	0	0	0	0	0	0	0	0.13	0	0
A230020J21Rik	NR_027298	0.17	0	0.06	0	0.22	0.04	0	0.15	0.36	0.05	0	0.26	0.11	0.07	0	0.08	0	0	0	0.3	0.16	0.05	0	0.07	0	0.12	0	0.1	0	0	0.04	0.07	0	0.08	0.2	0.38	0.07	0	0.55	0.27	0.55	0.35	0.2	0.38	0.24	0.46	0.47	0.34
A230028O05Rik	NR_040374	0.16	0.12	0.09	0	0.24	0.17	0.06	0.2	0.43	0.19	0.1	0.14	0.23	0.42	0.21	0.09	0.09	0.16	0.06	0	0.03	0	0.16	0.03	0.05	0.03	0.1	0.03	0	0.03	0	0.03	0.03	0.08	0	0.13	0.03	0.06	0.17	0.14	0.18	0.03	0.3	0.3	0.49	0.25	0.17	0.18
A230046K03Rik	NM_001033375	18.1	14.77	14.68	12.28	14.73	13.65	16.54	17.04	18.53	15.66	12.96	15.02	17.45	20.37	16.43	17.14	14.26	15.68	21.08	13.43	12.76	8.89	11.8	13.03	4.82	12.88	17.5	11.69	14.23	10.43	10.77	13.05	12.27	12.59	14.2	13.25	14.33	14.33	18.14	19.03	12.4	14.24	15.87	17.97	12.44	17.96	15.24	20.97
A230050P20Rik	NM_175687	10.46	12.81	11.23	13.56	20.84	14.81	13.6	16.01	13.51	14.7	11.48	14.71	14.47	19.82	16.29	12.78	15.11	13.96	15.63	1.95	2.62	2.65	2.76	2.3	1.74	2.21	5.53	2.32	2.26	2.42	2.65	2.04	2.51	1.68	2.33	1.71	2.28	2.71	2.07	2.34	2.39	3.38	2.34	1.42	2.04	1.6	3.16	2.17
A230056J06Rik	NR_045633	0	0	0	0.12	0	0	0.05	0	0	0.05	0	0	0.05	0.03	0	0.04	0	0	0	0	0	0	0	0	0	0	0	0.02	0.03	0	0	0	0.03	0	0.04	0	0	0	0	0.03	0	0	0.01	0.04	0.03	0	0	0
A230056P14Rik	NR_015495	0.33	0.46	0.16	0.56	0.48	0.21	0.61	0.65	0.36	0.2	0.54	0.27	0.4	0.49	0.12	0.27	0.39	0.51	0.5	0.32	0.27	0.41	0.22	0.55	0.21	0.32	0.63	0.44	0.11	0.22	0.53	0.54	0.42	0.28	0.26	0.45	0.09	0.3	0.61	0.53	0	0.3	0.58	0.98	0.7	0.56	0.3	0
A230057D06Rik	NR_015533	0	0	0	0	0	0.09	0	0	0	0	0	0	0.04	0.11	0	0.13	0.09	0	0.04	0	0	0.04	0	0	0	0	0	0.16	0	0.04	0	0	0	0	0	0.09	0	0	0	0	0	0.19	0	0	0.05	0.06	0	0
A230065H16Rik	NM_001101503	0.15	0	0	0	0	0	0	0.12	0.49	0.13	0.11	0	0	0	0	0	0.27	0.12	0	0.14	0	0	0	0	0	0	0	0	0	0	0	0	0.13	0	0	0	0	0	0	0	0	0	0.08	0	0.3	0.19	0	0
A230070E04Rik	NR_045897	0	0	0	0	0	0.04	0	0	0	0	0.08	0	0	0	0	0	0.14	0	0	0	0	0	0.12	0.07	0.08	0.14	0	0	0.04	0	0.12	0	0.09	0.13	0	0	0	0.15	0.11	0.11	0	0	0	0.08	0	0.11	0	0
A230072C01Rik	NR_027445,NR_027446	4.52	3.8	4.98	5.67	5.53	4.46	4.88	6.03	5.38	4.92	4.93	5.34	5.88	6.35	4.44	5.23	4.85	5.79	6.18	3.09	3.3	3.43	3.39	4.54	3.18	6.22	4.99	4.05	3.58	4.25	4.69	2.72	5.56	4.55	3.21	3.27	4.77	3.37	5.18	4.75	5.06	5.56	4.53	4.34	5.58	5.19	6.36	4.95
A230072E10Rik	NR_015600	0.32	0.32	0.34	0.3	0.67	0.46	0.61	0.25	0.37	0.14	0.37	0.46	0.42	0.73	0.59	0.28	0.31	0.49	0.56	0.36	0.44	0.24	0.03	0.16	0.24	0.33	0.62	0.22	0.49	0.26	0.3	0.39	0.4	0.2	0.51	0.24	0.73	0.34	0.51	0.48	0.27	0.67	0.25	0.27	0.17	0.19	0.51	0.49
A230073K19Rik	NR_033229	0.04	0.03	0.02	0	0.03	0.03	0.03	0.07	0.01	0	0.05	0.01	0.02	0.03	0	0.14	0.01	0.05	0.01	0	0	0	0	0.03	0	0.06	0.04	0.01	0	0.01	0.03	0	0.01	0.02	0.05	0.03	0.08	0	0.07	0.06	0.03	0	0.02	0.04	0.01	0.1	0.08	0.05
A230077H06Rik	NR_040329	0	0.1	0	0.4	0	0.04	0	0.09	0	0	0.07	0.11	0.16	0	0.04	0.04	0.13	0.03	0.22	0	0.03	0	0.02	0.03	0.04	0.04	0.14	0.03	0.05	0	0.02	0.07	0.12	0.04	0	0.06	0	0	0.13	0.28	0.14	0.38	0.14	0.1	0.03	0.07	0.06	0
A230103J11Rik	NR_110581,NR_110582	1.42	1.41	0.89	0	1.5	0.94	1.7	1.16	1.06	0.95	0.66	1.7	1.32	2.4	1.26	0.89	0.71	1.14	1.28	0.54	0.24	0.65	0.49	0.93	0.15	1.77	1.74	0.76	0.51	0.43	0.88	1.23	1.69	0.63	1.22	0.85	1.73	1.43	1.21	0.94	0.49	1.38	1.47	0.66	0.75	0.58	0.73	0.88
A230108P19Rik	NR_040333	0.04	0.11	0.03	0	0	0.05	0.07	0.09	0.08	0.12	0	0	0.06	0.13	0	0	0	0.06	0.03	0.18	0.1	0	0	0.08	0	0.11	0	0.19	0.04	0.06	0.18	0.08	0.07	0.18	0	0.18	0.08	0.07	0.04	0	0.24	0	0.06	0.06	0.07	0.14	0.04	0
A2m	NM_175628	0	0.01	0.02	0	0	0	0	0	0	0	0.01	0.02	0.08	0	0	0	0	0.02	0	0	0	0	0	0	0	0	0.06	0	0.02	0	0	0	0	0	0	0.02	0	0	0	0	0	0	0	0	0	0	0	0
A330009N23Rik	NR_045326,NR_045327,NR_045328	0.07	0.36	0.06	0	0.33	0.23	0.25	0.39	0.46	0.24	0.26	0.23	0.12	0.17	0.09	0.7	0.31	0.29	0.61	0.39	0.37	0.18	0.2	0	0	0.21	0.62	0.23	0.27	0.23	0.09	0.22	0.06	0.34	0.11	0.34	0.15	0	0.15	0.23	0.16	0.33	0.17	0.33	0.28	0.09	0.22	0.13
A330015K06Rik	NR_126080	0.9	0.7	0.91	0.09	1.01	1.61	1.34	0.69	0.64	1.02	1.19	1.15	1.65	1.48	0.86	0.83	0.89	1.39	1	0.08	0.04	0	0	0	0	0.08	0.06	0.04	0	0.07	0.03	0	0.04	0.05	0.06	0	0.04	0	0.13	0.09	0.05	0.07	0.28	0	0.17	0.16	0.13	0.23
A330023F24Rik	NR_015566	0.22	0.25	0.17	0.86	0.41	0.71	0.73	0.7	0.53	0.73	0.71	0.84	0.91	1.15	0.45	0.64	0.5	0.72	1.08	0.1	0.15	0.06	0.13	0.2	0.31	0.79	0.56	0.07	0.13	0.2	0.24	0.18	0.56	0.21	0.08	0.14	0.22	0.18	0.06	0.17	0.06	0.3	0.12	0.16	0.07	0.2	0.09	0.22
A330032B11Rik	NR_045329	0.81	0.61	1.1	1.72	0.4	0.47	0.5	0.99	0.89	0.47	0.27	0.49	0.75	0.97	0.66	0.56	1.37	0.6	1.59	1.15	0.85	0.68	0.37	0.11	0.37	0.45	0.51	1.07	0.8	0.71	0.39	0.29	0.67	0.89	0.31	0.68	0.94	0.31	0.83	1.68	0.49	0.11	1.35	0.23	0.79	0.52	0.92	0.56
A330033J07Rik	NR_102303	0.06	0.07	0.06	0.07	0.07	0.04	0.09	0.13	0.04	0.14	0.09	0	0.06	0.27	0	0.14	0.12	0.11	0.2	0.32	0.28	0.33	0.05	0.31	0.09	0.35	1.76	0.22	0.16	0.11	0.22	0.24	0.14	0.16	0.05	0.22	0.14	0.34	0	0	0.04	0	0.05	0	0.03	0	0.07	0.06
A330035P11Rik	NR_015586	3.51	3.22	3.81	3.17	3.38	3.92	4.4	3.27	4.55	2.72	3.3	4.09	5.13	3.23	2.55	1.58	1.53	4.3	4.1	3.97	4.24	2.43	3.05	3.91	1.67	4.54	4.54	2.92	3.59	2.62	4.45	4.87	3.88	4.45	5.12	2.57	3.65	4.6	6.32	5.56	4.93	4.53	4.98	5.65	3.74	5.3	4.62	4.05
A330040F15Rik	NR_015503	0.75	0.84	0.62	0	0.8	0.33	1.02	0.73	1.02	0.5	0.37	0.63	0.3	1.11	0.22	0.48	0.16	0.5	0.6	0.42	0	0	0.47	0.09	0.12	0.17	0	0.07	0.1	0.21	0.15	0	0.38	0.1	0.53	0.17	0.18	0.08	0.81	1.03	1.32	1.23	1.04	0.66	0.6	0.44	0.81	0.31
A330041J22Rik	NR_045835	0.49	0.53	0.63	0.43	0.57	0.45	0.41	0.86	0.44	0.3	0.29	0.58	0.39	0.83	0.64	0.43	0.46	0.62	0.27	0.35	0.39	0.47	0.59	0.05	0.35	0.05	0.51	0.25	0.48	0.2	0.18	0.05	0.31	0.79	0.23	0.59	0.21	0.29	0.96	0.83	0.77	0.62	1.87	0.47	0.75	0.71	1.32	1.46
A330048O09Rik	NR_045162	0	0.22	0.4	0	0	0.29	0	0.46	0	0	0	0	0	0	0.19	0	0.14	0.12	0.77	0.14	0	0.99	0	0.31	0.2	0.45	0.22	0.73	0.71	0.36	0.18	0	0.4	0	0.68	0.29	0.31	0.56	0.46	0.16	0.16	1.13	0	0.69	0.44	0	0.15	0.27
A330049N07Rik	NR_040646	5.92	6.2	6.41	2.87	12.52	7.05	8.98	8.58	7.67	6.93	7.32	8.68	10.74	11.82	8.92	5.65	9.46	8.34	8.69	1.01	0.92	0.43	1.22	2.26	1.02	2.64	2.51	0.78	0.56	0.95	1.52	1.65	2.3	0.95	0.79	0.93	1.67	1.35	2.07	1.99	0.92	1.49	1.81	2.16	1.36	2.02	1.37	1.35
A330050F15Rik	NM_001145192	0	0	0	0	0	0	0	0	0	0	0.03	0	0	0	0	0	0	0	0	0.4	0.42	0.3	0.17	0.59	0.17	0.28	0.29	0.31	0.39	0.23	0.34	0.29	0.29	0.29	0.37	0.28	0.21	0.3	0.04	0.09	0.04	0	0.12	0.06	0	0	0	0.29
A330069E16Rik	NR_015464	1.17	2.41	1.98	2.25	0.96	1.25	1.01	1.67	1.62	1.91	1.41	1.38	2.18	1.78	0.84	2.61	3.41	1.53	2.39	2.36	1.8	3.21	2.3	2.22	1.84	2.61	2.12	3.51	1.69	3.38	2.18	1.22	3.26	2.27	2.52	2.31	2.61	1.58	2.43	1.49	1.38	1.2	2.02	1.7	2.05	2.82	3.39	1.18
A330070K13Rik	NM_198665	0	0	0	0	0	0	0	0	0	0	0	0	0	0	0	0	0	0	0	0	0	0	0	0	0	0	0	0	0	0	0	0	0	0	0	0	0	0	0	0	0	0	0	0	0	0	0	0
A330074K22Rik	NR_110496	0.07	0.11	0.13	0.63	0.02	0.07	0.13	0.12	0.2	0	0.05	0.04	0.06	0	0	0.1	0.14	0.03	0.03	0.11	0	0.09	0	0.12	0	0	0.11	0.16	0.04	0.03	0.09	0	0.16	0.27	0.11	0	0.08	0.07	0.12	0.04	0.04	0	0.09	0.29	0.04	0	0.04	0.07
A330076C08Rik	NR_045088	0	0	0	0	0	0	0	0	0	0	0	0	0	0	0	0	0	0	0	0	0	0	0	0	0	0	0	0	0	0	0	0	0	0	0	0	0	0	0	0	0	0	0	0	0	0	0	0
A330076H08Rik	NR_015599	0.2	0.04	0.05	0	0.17	0.06	0.18	0.04	0.05	0.04	0.07	0.27	0.09	0.24	0.26	0.14	0.28	0.21	0	0.05	0.13	0	0	0.05	0	0	0.07	0	0.12	0.21	0	0	0.22	0.12	0	0.15	0.05	0.05	0	0	0	0	0.05	0.08	0.15	0	0.05	0
A330093E20Rik	NR_040342	1.36	1.19	1.15	0.51	2.27	1.17	1.63	1.32	2.07	1.36	1.09	1.64	1.45	3.05	2.54	1.15	1.05	0.89	1.34	0.86	1.46	1.22	1.37	1.12	0.93	1.05	1.89	1.02	1.13	1	1.49	0.89	1.42	1.33	1.55	0.73	1.6	0.87	1.58	1.9	1.19	1.37	1.71	1.77	2.68	2.42	1.82	2.3
A330102I10Rik	NR_045073,NR_045074,NR_045075,NR_045077	0.3	0.7	0	0	0.1	0.14	0	0	0	0.13	0.11	0	0	0.18	0.2	0.44	0	0.26	0.55	0	0.09	0.23	0	0	0	0	0	0	0	0	0	0.14	0	0	0	0	0	0.3	0.16	0	0	0	0	0	0	0.2	0.49	0
A3galt2	NM_001009819	0.82	0.45	0.73	0.4	1.43	1.26	1.94	0.23	0.88	0.43	0.96	1.56	1.5	0.41	0.41	0.27	0.1	1.2	0.24	0.59	0.77	1.02	0.56	2.18	0.52	4.77	1.96	0.89	0.58	0.42	2.12	1.85	2.92	1.27	0.62	0.82	2.45	1.4	5.09	5.17	3.95	4.88	4.04	5.25	3.17	3.46	4.16	3.57
A430005L14Rik	NM_001163019,NM_175287	19.53	27.38	25.78	27.3	20.59	22.49	20.99	29.01	23.48	25.53	23.28	25.34	24.22	26.43	21.97	27.92	27.3	23.39	31.04	24.12	28.18	27.27	30.98	20.39	25.75	19.5	31.48	26.04	25.52	28.78	23.81	22.12	20.99	23.46	26.83	25.6	22.05	24.18	29.34	30.77	31.27	39.39	32.17	29.31	29.5	32.63	29.47	29.26
A430033K04Rik	NM_183025	1.45	1.1	1.23	0.87	1.39	1.31	1.48	2.38	1.46	1.37	1.06	1.28	1.38	2.84	1.71	1.35	0.85	1.06	2.34	1.03	1.24	0.83	1.07	1.45	0.59	1.37	2.97	1.13	1.16	1.09	1.56	1.22	1.14	1.72	1.66	1.09	1.16	0.91	1.08	1.7	1.18	1.38	1.5	1.39	0.93	1.35	1.23	1.27
A430035B10Rik	NR_040452	2.38	1.66	1.72	1.62	1.57	1.53	1.57	1.79	1.87	2.56	1.46	1.51	1.08	1.69	1.58	1.49	1.28	1.89	1.69	3.62	3.01	1.77	2.28	3.11	1.45	2.93	2.16	2.34	2.93	2.29	2.24	2.1	2.77	2.7	3.1	3.15	2.1	1.94	1.67	1.15	1.26	0.96	1.53	2.22	1.71	1.96	1.45	1.56
A430078G23Rik	NM_001033378	0.78	1.25	0.75	2.58	1.25	0.88	1.42	1.28	1.25	1.55	1.03	1.5	1.62	1.76	1.37	1.44	1.95	1.41	0.78	0.99	1.09	1.05	0.98	1.23	1.17	1.86	1.46	0.8	1.1	1.57	1.41	0.93	1.31	0.85	0.76	1.04	1.3	0.97	2.22	3.2	1.54	1.4	1.98	1.48	1.64	2.22	1.79	1.44
A430088P11Rik	NR_045309,NR_045310	0.02	0.04	0.02	0	0.09	0.06	0.11	0.06	0.1	0.06	0.03	0.12	0.04	0.05	0	0	0	0.08	0.02	0	0	0	0	0.03	0	0	0	0	0	0	0	0	0	0	0.07	0	0	0.05	0.03	0	0	0	0	0	0	0	0.02	0
A430089I19Rik	NM_177913,NM_177913_chr5:94951010_94955288	0	0	0	0	0	0	0	0	0	0	0	0	0	0	0	0	0	0	0	0	0	0	0	0	0	0	0.15	0	0	0	0	0	0	0	0	0	0	0	0.08	0	0	0.21	0.1	0.08	0.05	0	0.11	0
A430090L17Rik	NR_045836	0	0	0	0	0.02	0	0	0	0	0	0	0	0	0	0.03	0	0	0	0.02	0.02	0	0	0	0.03	0	0.02	0	0	0	0.04	0.03	0	0	0	0	0	0	0	0.05	0.03	0.03	0	0	0	0	0	0	0.04
A430093F15Rik	NR_027805	0	0	0.04	0.19	0	0.03	0.08	0	0.05	0	0	0.05	0.04	0	0.06	0.06	0	0.04	0.31	0	0.08	0	0	0.09	0.06	0.17	0.32	0.15	0.16	0.28	0.16	0.14	0.19	0.11	0.2	0.09	0.14	0.04	0.32	0.38	0.57	0.18	0.45	0.47	0.3	0.84	0.37	0.16
A430105I19Rik	NM_001001982	0.57	1.81	0.38	0.78	0.76	0.71	0.65	0.86	1.53	1.88	0.66	0.63	0.47	2.11	0.47	1.69	1.37	0.73	1.14	2.54	3.22	1.85	3.97	2.92	1.95	2.77	5.55	2.37	3.86	3.65	2.99	2.65	3.19	3.05	2.59	2.97	3.19	3.36	3.52	3.72	2.38	3.39	2.94	4.97	2.25	3.55	3	4.51
A4galt	NM_001004150,NM_001170954	1.52	4.01	1.62	3.49	1.91	1.41	1.53	2.32	3.8	4.12	2.71	1.53	0.81	3.33	1.75	3.84	3.84	1.63	3.75	12.41	15.2	10.26	12.38	7.65	9	10.92	13.97	14.54	13.14	10.75	7.67	7.62	9.94	12.47	12.69	12.96	10.52	8.87	2.57	3.36	3.05	3.6	2.51	4.55	1.99	4.29	2.38	5.29
A4gnt	NM_001077424	0	0	0	0	0	0	0	0	0	0	0	0	0	0	0	0	0	0	0	0	0	0	0	0	0	0	0	0	0	0.03	0	0	0	0	0	0	0	0	0	0	0	0	0	0	0	0	0	0
A530006G24Rik	NR_046014	0	0	0	0	0	0	0	0	0	0	0	0	0	0	0	0	0	0	0	0	0	0	0	0	0	0	0	0	0	0	0	0	0	0	0	0	0	0	0	0	0	0	0	0	0	0	0	0
A530013C23Rik	NR_015500,NR_110334	0.13	0.22	0.08	0.99	0.09	0.36	0.24	0.3	0.28	0.36	0.35	0.05	0.15	0.61	0.11	0.3	0.12	0.39	0.27	0.04	0	0.04	0	0.05	0.24	0.09	0.06	0.04	0.05	0.21	0.03	0.05	0.12	0.1	0.13	0	0	0.12	0	0.05	0.05	0.16	0.02	0.07	0	0	0	0
A530016L24Rik	NM_177039	0.31	1.87	0.28	0.22	0.3	0.18	0.32	0.41	1.78	3.53	0.2	0.33	0.27	2.29	0.09	2.12	2.32	0.4	0.37	0.58	0.99	0.85	2.58	0.15	0.81	0.21	0.61	0.24	2.81	2.55	1.34	0.25	1.39	0.59	0.86	1.58	0.33	0.95	0.92	1.03	0.99	1.98	0.59	1.88	0.49	0.8	0.8	1.77
A530032D15Rik	NM_213615	0	0.16	0.05	0.41	0.04	0.09	0.11	0.18	0.07	0.14	0.12	0.07	0	0	0.25	0.25	0.11	0.11	0.11	0.17	0.05	0.28	0	0.06	0.39	0.06	0.16	0.05	0.12	0.13	0	0.06	0.05	0.07	0.26	0.17	0	0.11	0.07	0.05	0.07	0	0	0.09	0	0.07	0	0
A530046M15Rik	NR_046131	0	0	0	0	0	0	0	0	0	0	0	0	0	0	0	0.09	0	0	0	0	0.05	0	0	0	0	0.06	0	0	0	0	0	0.06	0	0	0	0	0	0.17	0	0	0	0	0	0	0	0	0	0
A530050N04Rik	NR_045419	0	0	0	0	0	0	0.05	0	0	0	0	0	0.09	0	0	0	0	0	0	1.01	0.75	0.74	0.11	0.81	0.28	0.3	0.9	0.56	0.86	0.75	0.58	0.43	0.73	0.62	0.4	0.81	0.27	0.68	0.22	0.23	0.28	0.45	0.29	0.08	0.2	0.46	0.05	0.37
A530053G22Rik	NR_015565	0	0	0	0	0	0.04	0	0.05	0	0.11	0.05	0	0	0	0	0.09	0	0	0	0	0	0.05	0	0	0.18	0	0	0	0.16	0.26	0.04	0	0	0.23	0	0.19	0	0	0	0	0	0	0	0.1	0	0	0	0
A530054K11Rik	NM_183146	2.93	1.88	1.91	2.22	2.56	2.2	2.5	2.43	2.92	1.43	1.94	2.43	2.7	4.17	3.35	1.99	1.58	2.56	3.46	1.28	1.59	0.67	1.42	1.4	0.35	1.86	3.55	1.15	1.47	0.78	1.17	1.66	1.27	1.71	1.81	1.53	1.37	1.36	2.07	2.7	1.71	1.69	2.47	2.58	1.28	2.16	1.95	3.24
A530058N18Rik	NR_028423	0	0	0	0	0	0.04	0	0	0.07	0	0.04	0	0	0	0	0	0	0	0	0	0	0	0	0	0	0	0	0	0	0	0	0	0	0	0	0	0	0	0.13	0	0.07	0.03	0.06	0	0	0	0	0
A530064D06Rik	NM_001113556,NM_178796	0.21	0.2	0.24	0	0.25	0.16	0.11	0.17	0.18	0.14	0.13	0.11	0.14	0.16	0.21	0.49	0.25	0.27	0	0.2	0.44	0.16	0.86	0.11	0.15	0.34	0.26	0.07	0.3	0.18	0.14	0.11	0.34	0	0.17	0.11	0.5	0.29	0.41	0.56	0.3	0	0.22	0.46	0.05	0.15	0.22	0.36
A530065N20Rik	NR_046142	0	0.02	0.02	0	0	0	0	0	0	0.04	0	0	0	0.03	0.03	0.03	0	0.02	0	0	0	0	0	0	0	0	0	0	0	0	0.03	0	0	0	0	0	0	0	0.03	0	0	0	0	0	0	0	0	0
A530072M11Rik	NR_045765	0.68	0.72	0.36	0.32	0.44	0.45	0.27	0.47	0.65	0.17	0.47	0.37	0.48	0.77	0.7	0.42	0.51	0.91	0.97	0.69	0.78	0.76	0.35	0.84	0.41	0.54	1.24	0.38	0.78	0.37	0.45	0.84	0.67	1.08	0.77	0.2	1.1	0.47	1.01	1.37	0.93	0.98	1.4	1.63	1.79	1.47	1.05	1.91
A530088E08Rik	NR_029458	0	0	0	0	0	0	0	0	0.06	0	0	0	0	0	0	0	0	0	0	0	0	0	0	0.05	0	0.11	0.31	0	0	0	0	0	0	0	0	0	0	0.06	0.07	0.06	0	0	0.05	0	0.05	0	0.05	0
A530099J19Rik	NM_175688	0.03	0.1	0.03	0	0.02	0	0.03	0	0.14	0	0.12	0	0	0	0	0.19	0.03	0	0.03	0.03	0.06	0.06	0.02	0	0	0.03	0.1	0.03	0.08	0.05	0.02	0	0	0.12	0	0.03	0.07	0.12	0	0	0.14	0	0.03	0	0.07	0.08	0	0
A630001G21Rik	NM_177055	1.68	1.52	1.03	0	1.83	1.23	0.87	1.57	1.4	1.6	1.11	1.46	1.54	2.48	2.01	1.35	2.08	1.14	1.9	0.85	0.95	0.73	1.06	0.7	0.99	0.47	0.91	1.17	0.86	1.17	0.43	0.35	0.89	0.69	1.25	1.03	0.85	1.17	0.76	0.73	0.68	0.79	0.54	0.44	0.91	0.98	0.55	0.52
A630010A05Rik	NR_033556	0	0	0	0	0	0	0	0	0	0	0	0	0.1	0	0	0	0	0	0.15	0.11	0	0	0	0	0	0	0	0	0	0	0	0	0	0	0	0	0	0.05	0	0	0.06	0	0	0	0	0	0	0
A630012P03Rik	NR_045367	0	0	0	0	0	0	0	0	0	0	0	0	0	0	0	0	0	0	0	0	0	0	0	0.05	0	0	0	0	0	0	0	0	0	0	0	0	0	0	0	0.05	0	0	0	0	0	0	0	0
A630019I02Rik	NR_046182	0	0	0	0	0	0	0	0	0	0	0	0	0	0	0	0	0	0	0	0	0	0	0	0.04	0	0	0	0	0	0	0	0	0	0	0	0	0	0	0	0	0	0.14	0	0	0	0	0.01	0.06
A630020A06	NR_045740	0.98	0.8	1	1.63	1.05	0.89	0.89	1.07	1.23	0.84	0.6	0.9	1.02	1.15	1.12	0.77	0.43	0.98	1.17	1.66	1.52	0.97	0.88	1.48	0.43	1.27	1.21	1.08	1.28	0.95	1.45	1.19	1.38	1.03	1.84	1.2	1.38	1.2	2.62	2.24	2.02	0.72	1.96	2.18	1.52	1.83	1.94	1.88
A630023A22Rik	NM_001251843	0.96	0.42	1.26	0.74	0.38	0.59	0.71	0.53	0.68	0.15	0.28	0.82	0.82	0.12	0	0.6	0.19	0.35	1.1	0	0	0	0	0	0	0	0	0	0	0	0	0.07	0.06	0	0	0	0	0.07	0.3	0.31	0.31	0.07	0.21	0.11	0	0.27	0.49	0.32
A630023P12Rik	NR_102290	0	0	0	0	0.2	0.1	0	0	0.17	0	0	0.32	0	0	0	0	0.28	0	0	0	0.13	0	0	0	0	0	0	0	0.37	0	0	0	0.14	0	0.47	0.15	0.32	0	0	0	0.34	0	0.46	0	0	0	0	0.28
A630033H20Rik	NM_001122595,NM_001122596,NM_175442	0.16	0.19	0.03	0.19	0.02	0.06	0.03	0.08	0.07	0.14	0.07	0.2	0.03	0	0.16	0.13	0.12	0.08	0.11	0.06	0.18	0	0	0.19	0	0.03	0.37	0	0.33	0.34	0.06	0	0.05	0.15	0.05	0.18	0.22	0.14	0.03	0.07	0.1	0	0.03	0.09	0.03	0	0.29	0.33
A630066F11Rik	NR_030698	2.9	2.52	2.72	5.49	2.9	3.19	2.69	4.55	3.76	4.1	1.82	2.15	3.5	3.37	3.1	5.45	2.98	2.82	4.61	4.42	3.77	3.12	4.32	4.07	3.33	3.6	3.78	5.31	4.45	4.22	4.14	3.25	3.38	3.87	2.94	4.78	4.23	3.66	2.93	3.49	3.49	5.51	2.89	2.23	2.72	3.78	4.69	3.43
A630072M18Rik	NR_030699	1.46	2.19	1.46	2.54	1.74	1.51	2	1.89	2.59	1.78	1.21	1.58	1.46	2.66	2.07	1.95	1.84	1.27	2.12	0.51	0.46	0.44	0.36	0.4	0.37	0.62	0.77	0.47	0.52	0.5	0.26	0.42	0.36	0.47	0.39	0.35	0.5	0.36	0.56	0.33	0.41	0.55	0.39	0.58	0.58	0.26	0.68	0.53
A630073D07Rik	NM_001142969	0	0	0	0	0	0	0	0	0	0	0	0	0	0	0	0	0	0	0	0	0	0	0	0	0	0	0	0	0	0	0	0	0	0	0	0	0	0	0	0	0	0	0	0	0	0	0	0
A630075F10Rik	NR_033632,NR_033634	0.37	0.33	0.44	1.83	0.36	0.45	0.66	0.57	0.82	0.39	0.4	0.22	0.55	0.64	0.77	0.74	0.37	0.36	0.38	0.36	0.45	0.35	0.95	0.46	0.45	0.41	0.5	0.57	0.4	0.55	0.59	0.21	0.43	0.59	0.41	0.53	0.71	0.21	0.61	1.01	0.16	0.84	0.42	0.78	0.52	0.87	0.54	0.75
A630076J17Rik	NM_001256174	0	0	0	0	0	0	0	0	0	0	0	0	0	0	0	0	0	0.12	0	0	0	0	0	0	0	0	0	0	0	0	0	0	0	0	0	0	0	0	0	0	0	0	0	0	0	0	0	0
A630077J23Rik	NR_040667	0	0.07	0	0.42	0	0.06	0	0	0	0	0	0	0.09	0	0	0	0	0	0	0.1	0	0.08	0	0	0	0	0.15	0.08	0.12	0	0	0.11	0	0	0	0	0	0	0	0.11	0	0	0.05	0	0.1	0	0	0
A630089N07Rik	NR_015491	8.4	5.78	6.02	3.69	9.84	5.94	12.13	6.28	8.39	3.41	7.9	10.36	14.16	14.92	6.83	4.24	2.26	9.97	9.34	9.22	8.25	3.34	3.59	17.24	2.32	28.25	15.96	6.31	8.74	5.86	15.33	19.53	22.28	9.4	12.74	8.67	18.78	15.53	13.86	10.17	3.91	5.79	8.76	8.52	4.87	6.69	9.18	10.38
A630095E13Rik	NM_001033325	0.31	0.48	0.43	1.33	463.58	88.32	11.08	102.77	0.35	0.67	1473.53	6.11	10.51	4.17	0.81	0	0.44	9.98	28.7	2.62	1.36	1.08	1.2	73.54	17.79	473.82	3.07	0.79	0.57	1.16	52.44	1.87	6.75	0.94	0.5	1.39	47.99	12.39	0	0	0	0	0	0	0	0	0	0
A630095N17Rik	NM_001243090,NM_001243091	0.44	0.57	0.27	0	0.71	0.69	0.56	0.71	0.16	0.38	0.44	0.48	0.81	0.18	0.19	0	0	0.13	1.47	0.88	1.43	0.77	1.45	1.43	0.21	0.77	1.34	0.88	0.91	0.61	1.45	1.13	2.46	1.44	1.41	1.03	1.73	1.02	1.59	0.65	1.52	0.41	0.99	1.18	1.36	1.15	0.48	0.82
A730006G06Rik	NR_110485	0	0	0	0	0	0.06	0.08	0	0.11	0	0	0	0	0	0	0	0	0	0.04	0	0	0	0	0	0	0.1	0.07	0	0	0	0	0	0	0	0	0	0	0	0	0	0.06	0	0	0	0	0	0	0
A730008H23Rik	NM_172505	0.31	0	0	0	0	0	0.65	0	0.66	0	0	0	0.43	0	0.59	0	0	0.15	0.13	0.33	0.92	0	1.08	0.99	0	0	1.26	0.66	0.5	0.11	0.17	1.41	0.14	0.49	1.75	0	0.37	0.34	0.65	0.77	0.05	0.96	0	0.76	0	0	0	0.91
A730017C20Rik	NM_001167925,NM_173759,NR_033764,NR_033765	0.42	0.39	0.28	0.87	0.45	0.38	0.19	0.32	0.57	0.36	0.3	0.27	0.55	0.48	0.26	0.47	0.43	0.36	0.39	2.1	1.86	2.68	1.85	2.04	1.48	1.01	2.94	1.99	1.73	1.94	1.66	1.51	1.82	1.32	1.66	1.63	1.53	1.71	1.08	1.97	0.77	0.96	1.06	1.24	1.59	1.53	0.97	2.27
A730017L22Rik	NR_015523	2.7	2.51	2.52	3.04	3.29	2.6	3.49	2.74	3.31	2.5	1.56	3.24	3.05	4.37	4.22	2.64	3.53	3.21	3.66	2.07	2.28	0.78	1.93	2.67	1.18	3.4	3.38	1.56	2.35	2.24	2.67	3.08	3.15	2.5	2.32	1.89	3.09	2.32	3.5	3.14	1.16	3.47	2.34	3.49	2.32	3.5	2.76	2.55
A730018C14Rik	NR_036459	0	0	0	0	0	0	0	0	0	0	0	0	0	0	0	0	0	0	0	0.1	0.14	0	0	0	0	0	0	0.09	0.19	0.09	0.1	0.06	0	0.19	0.08	0.16	0.11	0	0	0	0	0	0	0	0	0	0	0
A730020E08Rik	NR_040287	0.6	0.26	0.55	0.21	0.87	0.82	0.62	0.52	0.22	0.56	0.44	0.82	0.49	1.25	0.88	0.96	0.88	0.74	0.59	0.77	0.4	0.32	0.31	0.47	0.39	1.06	0.65	0.67	0.61	0.64	0.71	0.35	0.15	1.08	0.78	0.55	0.91	0.64	1.49	0.93	1.79	1.03	1.22	0.87	1.39	1.86	1.18	1.64
A730020M07Rik	NR_036456,NR_036457,NR_036458	0.59	0.48	0.17	0.16	0.28	0.31	0.3	0.43	1.03	0.99	0.21	0.38	0.5	0.27	0.38	0.94	0.91	0.71	0.47	0.27	0.76	0.39	0.05	0.29	0.28	0.1	0.83	0.27	0.56	1.27	0.12	0.2	0.21	0.39	0.94	1.16	0.53	0.18	0.12	0.47	0.6	0.8	0.38	0.72	0.44	0.45	0.77	1.42
A730036I17Rik	NR_045838	0	0	0	0	0	0.02	0.02	0	0	0	0	0	0	0.03	0	0	0	0.04	0.07	0	0	0	0	0.03	0	0.05	0.08	0	0.03	0	0.02	0	0.07	0	0	0	0	0	0	0.03	0	0.07	0	0	0	0	0	0
A730043L09Rik	NR_040769	0	0	0	0	0.05	0	0	0	0	0	0	0	0	0	0	0	0	0	0.21	0	0	0	0	0	0	0	0	0	0	0	0.05	0	0	0	0	0	0.08	0	0	0	0	0	0	0	0	0	0	0
A730046J19Rik	NR_040271	0.11	0.16	0.03	0.12	0.1	0.05	0.09	0.23	0.17	0.15	0.1	0.08	0.12	0.41	0.27	0.08	0.09	0.13	0.58	0.55	0.45	0.44	0.05	0.41	0.13	0.34	1.07	0.7	0.37	0.41	0.43	0.96	0.46	0.77	0.39	0.19	0.3	1.09	0.86	0.47	0.46	0.4	0.89	0.3	0.6	0.12	0.85	0.39
A730056A06Rik	NR_040324,NR_040325	0.22	0.29	0.1	0.13	0.11	0.18	0.14	0.12	0.31	0.21	0.02	0.2	0.09	0.26	0.04	0.59	0.2	0.23	0.41	0.09	0.19	0.48	0.42	0.13	0.26	0.21	0.83	0.18	0.27	0.54	0.28	0.13	0.08	0.19	0.34	0.28	0.23	0.29	0.5	0.28	0.17	0.28	0.29	0.39	0.38	0.12	0.33	0.69
A730082K24Rik	NR_040317,NR_040319	0	0	0	0	0	0	0	0	0.06	0	0	0	0	0	0	0	0.05	0	0	0	0	0	0	0	0	0	0	0	0	0	0	0	0.05	0	0	0	0	0	0	0.06	0	0	0	0	0	0	0	0
A730085K08Rik	NR_045967	0	0	0	0	0	0.11	0.16	0	0	0	0	0.19	0.31	0	0	0	0	0.29	0.31	0	0	0	0	0	0	0.18	0	0.15	0	0	0	0	0	0	0	0	0.55	0	0	0	0	0	0	0	0	0	0	0
A730090H04Rik	NR_040279	0	0	0	0	0.04	0	0	0.04	0.06	0.23	0	0	0.15	0.07	0	0	0.15	0	0.05	0	0	0	0	0	0	0	0	0	0	0	0	0	0.05	0	0	0.05	0	0	0	0	0	0	0.11	0	0	0	0	0.1
A730090N16Rik	NR_040390	0.53	0.36	0.3	0.86	0.36	0.13	0.25	0.48	0.22	0.28	0.15	0.43	0.65	0.48	0.26	0	0.44	0.5	0.12	0.13	0	0.11	0	0.21	0	0.27	0.3	0.17	0.41	0.33	0.08	0.28	0.24	0	0.52	0	0.07	0.19	0.29	0.22	0.22	0.24	0.28	0.21	0	0.78	0.14	0.37
A730098P11Rik	NR_038091	7.8	7.56	6.71	4.34	6.59	6.32	7.61	6.56	5.41	5.22	5.75	6.76	7.09	7.5	5.82	5.13	6.67	7.63	4.84	9	8.06	8.48	7.53	7.43	8.59	7.12	7.16	8.45	6.17	6.58	7.38	7.8	7.89	8.84	6	6.59	8.38	8.76	9.4	9.31	9.96	9.03	8.98	8.05	10.91	9.62	10.47	8.18
A830009L08Rik	NR_045161	0.13	0.12	0.03	0.21	0.22	0.08	0.15	0.28	0.28	0.11	0.14	0.14	0.09	0.27	0.21	0	0.21	0.03	0.35	0.19	0.11	0.25	0.02	0.14	0.22	0	0.1	0.14	0.2	0	0.1	0.03	0.09	0.12	0.15	0.16	0.44	0.03	0.03	0.36	0.21	0.34	0.22	0.2	0.23	0.55	0.41	0.24
A830010M20Rik	NM_001007574,NM_001168557	0.76	0.72	0.6	0.31	0.7	0.65	0.57	0.65	0.81	0.53	0.61	0.69	1.06	0.88	0.6	0.8	0.46	0.6	0.99	0.64	0.88	0.51	0.68	0.92	0.18	1.04	1.09	0.68	0.63	0.79	0.5	0.68	0.87	0.55	0.89	0.64	0.74	0.81	0.73	0.89	0.45	0.59	0.42	1.06	0.43	0.48	0.7	0.83
A830011K09Rik	NR_126072,NR_126073	0	0	0	0	0.03	0.02	0	0	0	0	0.37	0	0	0	0	0	0	0	0	0	0	0	0	0	0	0.08	0	0	0	0	0	0	0.03	0	0	0	0	0	0	0	0	0	0	0	0	0	0	0
A830018L16Rik	NM_001160369,NM_001160370,NM_001160371,NM_177173	0.13	0.13	0.11	0.22	0.09	0.03	0.15	0.1	0.17	0.12	0.12	0.04	0.14	0.12	0.04	0.05	0.12	0.05	0.12	0.06	0.01	0.08	0.01	0.08	0.1	0.03	0	0.01	0.05	0.1	0.05	0.03	0.05	0	0.07	0.03	0.02	0.01	0.06	0.07	0.04	0	0.05	0.05	0.08	0.02	0.08	0.06
A830019L24Rik	NR_040551	0	0	0	0	0	0	0	0	0	0	0	0	0	0	0	0	0	0	0	0	0	0	0	0	0	0	0	0	0	0	0	0	0	0	0	0	0	0	0	0	0	0	0	0	0	0	0	0
A830052D11Rik	NR_045403	0.16	0.25	0.3	0	0.22	0.43	0.38	0.13	0.18	0.42	0.12	0.35	0.37	0.1	0	0.24	0.15	0.07	0.3	0.49	0.29	0.14	0.29	0.79	0.23	0.42	0.37	0.91	0.6	0.48	0.45	0.18	0.82	0.2	0.39	0.41	0.17	0.08	0.18	0.27	0	0.04	0.21	0	0.25	0	0.09	0.3
A830080D01Rik	NM_001033472	9.37	4.83	5.69	7.28	7.87	8.12	10.05	5.91	9.24	5.76	6.28	8.97	10.07	7.66	7.3	4.76	5.22	9.64	6.96	9.7	8.27	6.02	5.1	11.05	4.13	12.51	9.96	6.26	7.81	6.15	9.63	10.64	10.93	9.57	11.6	7.07	9.06	9.52	15.45	13.63	11.01	9.23	12.87	14.39	12.04	15.77	12.97	16.99
A830082K12Rik	NR_045195	0.31	0.3	0.07	0.25	0.3	0.33	0.11	0.21	0.35	0.18	0.16	0.17	0.21	0.28	0.41	0.62	0.44	0.34	0.28	0.12	0.38	0.47	0.22	0.17	0.16	0.12	0.29	0.74	0.38	0.1	0.26	0.04	0.39	0.04	0.31	0.43	0.25	0.38	0.21	0.3	0.09	0.6	0.06	0.19	0.28	0.26	0.21	0.29
A830082N09Rik	NR_015526	0.37	0.33	0.22	0.32	0.44	0.46	0.34	0.45	0.54	0.17	0.27	0.22	0.39	0.52	0.25	0.47	0.2	0.35	0.39	0.33	0.49	0.19	0.12	0.27	0.11	0.3	0.59	0.24	0.39	0.24	0.33	0.29	0.32	0.34	0.16	0.23	0.29	0.33	0.25	0.39	0.22	0.27	0.35	0.43	0.18	0.49	0.33	0.29
A930001A20Rik	NR_040549,NR_040550	0.07	0	0.31	0	0.14	0	0	0	0.07	0.06	0.05	0	0.12	0.16	0.09	0.19	0	0.06	0.06	0.2	0.65	0.3	0	0.5	0.28	0.48	0.4	0.12	0.66	0.17	0.21	0.22	0.37	0.16	0.36	0.34	0.21	0.19	0.15	0.53	0.15	0.28	0.21	0.42	0.35	0.18	0.22	0.12
A930001C03Rik	NR_045989,NR_045990	0	1.32	1.64	5.01	2.39	1.76	0.96	2	1.94	2.21	1.02	1.32	1.94	1.45	2.43	3.03	1.69	0.93	1.6	4.81	3.74	3.38	5.42	2.54	5.99	4.32	6.75	3.87	3.53	4.75	3.22	2.59	3.66	3.91	4.03	3.09	2.09	3.94	5.02	6.8	4.15	4.63	3.66	4.4	5.12	5.13	4.18	4.8
A930002C04Rik	NR_126083	0	0	0	0	0	0	0	0	0	0	0	0	0	0	0	0	0	0	0	0	0	0	0	0	0	0	0	0	0	0	0	0	0	0	0	0	0	0	0	0	0	0	0	0	0.04	0	0	0
A930003A15Rik	NR_015488,NR_027896	0	0	0	0	0	0	0	0	0	0	0	0	0.08	0	0	0	0	0	0.16	0	0.08	0	0	0	0	0	0.14	0	0	0	0	0	0	0	0	0	0	0.48	0	0	0	0	0	0	0	0	0	0
A930003O13Rik	NR_027362	0.05	0.04	0	0	0.03	0	0.04	0.07	0.05	0	0.07	0	0	0	0.06	0	0	0	0	0.09	0	0	0	0.05	0	0	0	0	0.06	0.08	0.08	0.25	0.04	0	0.29	0.08	0	0	0.1	0	0.05	0	0	0	0	0	0.25	0
A930004D18Rik	NR_028376,NR_028377	0.17	0.37	0.33	0.12	0.45	0.33	0.24	0.39	0.23	0.3	0.25	0.29	0.39	0.51	0.07	0.46	0.62	0.3	0.2	0.28	0.42	0.14	0.59	0.39	0.18	0.38	0.19	0.24	0.29	0.38	0.27	0.13	0.29	0.18	0.32	0.29	0.3	0.21	0.09	0.67	0.25	0.54	0.63	0.4	0.3	0.3	0.29	0.6
A930005H10Rik	NR_015487,NR_027894,NR_027895	10.06	11.54	11.79	8.14	11.6	12.87	10.98	14.36	11.39	14.83	10.09	12.34	11.68	14.25	9.29	12.14	11.84	10.47	11.88	6.9	10.08	14.07	8.97	11	13.1	10.03	11.69	11.96	12.1	13.45	8.99	7.86	11.19	8.68	6.03	8.63	9.85	10.61	7.99	12.08	8.75	10.45	9.43	8.3	10.62	8.99	10.43	6.2
A930006I01Rik	NR_040332	0	0	0	0	0	0	0	0	0	0	0	0	0	0	0	0	0	0	0	0	0	0	0	0	0	0	0	0	0	0	0	0	0	0	0	0	0	0	0	0	0	0	0	0	0	0	0	0
A930006K02Rik	NR_077219	0.85	0.93	1.01	0.26	1.5	0.56	0.34	0.58	0.67	1.04	0.63	1.06	0.87	0.89	1.1	1.05	0.46	0.93	0.55	0.73	1.07	0	0.85	0.65	1.38	0.38	0.73	1.04	0.75	0.7	0.52	0.26	0.56	0.44	0.39	0.36	0.65	0.24	0.65	0.81	1.24	0.83	0.75	1.35	0.5	0.63	0.65	0.23
A930007I19Rik	NR_015567	0	0.06	0.11	0	0.21	0.03	0.22	0.12	0.13	0.03	0.06	0.08	0.07	0.09	0	0.06	0.07	0.07	0.14	0.16	0.17	0.1	0	0.21	0.05	0.16	0.17	0.03	0.29	0.03	0.26	0	0.25	0.1	0.31	0.2	0.08	0.15	0.21	0.17	0.04	0	0.26	0.18	0.12	0.05	0.08	0.36
A930009A15Rik	NM_029982	0	0	0	0	0	0	0	0	0	0	0	0	0	0	0	0	0	0	0	0	0	0	0	0	0	0	0	0	0	0	0	0	0	0	0	0	0	0	0	0	0	0	0	0	0	0	0	0
A930011G23Rik	NR_030692	0	0	0	0	0.02	0.02	0	0.02	0	0	0	0.03	0	0	0	0.04	0.05	0	0	0	0	0	0	0	0	0.03	0.04	0	0	0	0	0.03	0	0	0	0	0.03	0.03	0	0.03	0.09	0	0.01	0	0	0.04	0	0
A930011O12Rik	NR_040709	0	0	0	0	0	0	0	0	0	0	0	0	0	0	0	0	0	0	0	0	0	0	0	0	0	0.02	0	0	0	0	0	0	0	0	0	0	0	0	0	0	0	0	0	0	0	0	0	0
A930012L18Rik	NR_026853	0	0.09	0	0	0	0.03	0.12	0	0.09	0.15	0	0.09	0	0.06	0.1	0	0	0	0.04	0.04	0	0.07	0	0.09	0.05	0	0	0.13	0	0.19	0.13	0.05	0.03	0.05	0	0	0.08	0	0	0.04	0	0.06	0.03	0	0	0.2	0	0.07
A930013F10Rik	NR_027886	0.63	0.43	0.48	0.16	1.14	0.85	1.59	0.92	0.99	0.64	0.74	1.08	1.02	2.99	0.87	0.7	0.39	0.81	1.51	0.3	0.36	0.06	0.63	0.8	0.26	2.25	2.1	0.22	0.5	0.22	0.77	0.87	0.94	0.5	0.7	0.07	1.11	0.89	0.56	0.38	0.21	0.04	0.21	0.12	0.08	0.49	0.08	0.28
A930015D03Rik	NR_015618	14.31	14.82	19.55	20.26	14.95	17.95	15.46	13.7	15.2	11.81	12.04	14.13	15.89	13.57	14.01	8.69	15.93	16.44	13.51	15.44	12.42	13.75	17.69	12.76	13.7	12.32	11.79	15.52	11.67	12.4	14.15	18.03	14.6	13.83	12.89	14.06	14.19	15.1	17.49	18.74	15.75	12.34	17.11	16.25	17.64	11.23	17.98	12.72
A930016O22Rik	NR_073014,NR_073015	0.19	0.22	0.36	0.85	0.2	0.29	0.23	0.19	0.18	0.28	0.16	0.31	0.15	0.19	0.18	0.45	0.04	0.56	0.51	0.17	0.11	0	0	0.52	0.15	0.48	0.24	0.11	0.05	0.26	0.31	0.02	0.28	0	0.23	0.04	0.05	0.16	0	0.39	0.19	0	0.04	0	0.08	0.11	0.08	0.07
A930017M01Rik	NR_033609	0	0.02	0	0	0.02	0	0	0.02	0	0	0.02	0.03	0	0	0	0	0	0	0.02	0	0	0.02	0	0	0	0	0	0	0	0	0	0	0	0	0	0	0	0	0	0	0	0	0	0	0	0	0	0
A930018P22Rik	NM_026634	0.34	0	0.64	0.99	0.16	0.38	0.22	0.46	0.38	0.1	0.34	0	1.55	0.56	0.89	0.17	0.33	0.49	0.52	0.34	1.21	0.4	0.49	0.99	0.65	0.24	0.69	0.49	0.42	1.05	0.56	0.5	1.16	1.4	0.73	0.69	0.98	0.56	0.62	0.51	0.26	0.3	0.77	0.37	0.12	0.3	0.62	0.85
A930019D19Rik	NR_040619	0	0.07	0.18	0	0	0	0	0	0	0	0	0	0.09	0	0	0	0	0	0	0	0	0	0	0	0	0.1	0	0	0	0	0	0.11	0	0	0	0	0	0	0	0.33	0	0	0.1	0	0	0	0	0
A930024E05Rik	NR_045820	1.53	1.59	1.85	1.87	1.58	1.79	1.38	2.56	1.96	2.38	1.21	2.11	2.09	2.88	1.81	1.38	2.26	1.58	2.03	0.29	0.72	0.58	0.41	0.31	0.67	0.68	1.5	1.28	0.47	0.4	0.68	0.72	1.05	0.77	1.06	1.11	0.46	0.69	0.78	0.64	1.45	1.09	0.72	0.61	0.49	1.38	0.56	0.71
A930041C12Rik	NR_046195	0	0	0	0	0	0	0	0	0	0.47	0	0.2	0	0	0	0.26	0	0.16	0	0.54	0.16	0	0.38	0	0.26	0.38	0	0.31	0	0	0.45	0	0	0	0	0.18	0	0.18	0	0	0	0	0.09	0	0	0.23	0	0
AA387883	NR_030678	0	0.04	0	0	0	0	0	0	0	0	0	0	0	0	0	0	0	0	0	0	0	0	0	0	0	0	0	0	0	0	0	0	0	0	0	0	0	0	0	0	0	0	0	0	0	0	0	0
AA388235	NR_033305	0.14	0.55	0.11	1.05	0.06	0.12	0.06	0.09	0.08	0	0.05	0.22	0.18	0.22	0.33	0.03	0.04	0.14	0.13	0.44	0.33	0.14	0.15	0.05	0.09	0.21	0.17	0.6	0	0.1	0.17	0.22	0.13	0.43	0	0.09	0.12	0.16	0.45	0.49	0.18	0.06	0.56	0.15	0.26	0.03	0.74	0.04
AA413626	NR_102683	0	0	0	0	0	0	0	0	0	0	0	0.28	0	0.31	0	0	0	0	0	0	0	0	0	0	0	0	0	0	0	0	0	0	0	0	0	0	0	0	0	0	0	0	0	0	0	0	0	0
AA414768	NM_001272033	22.36	22.11	18.29	17.94	27.93	15.33	21.31	43.79	19.99	22.08	17	19	17.55	40.58	35.22	21.65	24.49	15.61	22.73	2.57	3.41	2.35	2.5	2.46	2.3	2.54	6.67	3.43	3.62	3.03	2.01	1.93	2.09	3.35	2.58	2.41	2.85	1.95	2.12	2.2	1.47	0.98	2.39	1.47	2.11	1.35	2.1	2.63
AA415398	NM_001004178	4.04	2.98	3.24	2.27	3.66	3.84	4.66	3.72	4.33	2.57	2.48	3.89	4.2	3.15	2.79	2.89	3.1	3.34	3.01	2.54	4.33	2.42	3.7	3.63	3.21	4.48	3.48	3.49	3.75	3.44	3.48	3.11	4.51	3.28	3.76	3.64	4.17	2.81	4.9	3.31	2.83	3.27	3.25	4.29	3.93	3.87	4.09	3.44
AA465934	NR_028363	1.8	2.78	1.45	7.18	2.15	1.78	0.76	4.2	1.46	4.27	1.73	2.61	2.14	3.23	1.69	6.39	4.87	2.5	4.93	2.05	4.33	4.76	2.37	2.25	1.9	2.26	4.43	5.71	1.61	2.16	2.08	2.34	3.18	3.77	2.94	4.37	3.61	2.62	3.91	3.42	2.07	2.32	3.86	4.64	3.22	8.27	3.63	3.9
AA467197	NM_001004174	2.09	2.3	1.52	1.28	1.23	1.6	1.28	3	2.66	2.7	1.44	2.13	22.14	2.56	1.17	2.59	1.55	2.82	4.19	8.34	7.36	8.81	11.15	9.19	7.71	11.43	5	9.32	11.07	7.83	10.48	8.36	9.55	10.03	11.93	12.08	9.9	8.55	15.97	14.93	20.66	18.82	15.44	13.17	13.95	17.65	14.13	17.27
AA474331	NR_033628	2.53	1.86	2.79	2.86	3.23	1.61	5.02	2.71	3.36	2.18	1.79	2.76	2.5	3.82	2.96	0.7	1.25	2.37	3.71	2.12	3.29	0.63	2.64	4.93	0	3.86	4	1.86	2.08	2.41	3.11	2.63	2.45	4.43	3.07	2.29	4.66	4.02	3.65	3.6	1.78	3.31	2.31	1.73	1.61	2.51	4.38	2.47
AA536875	NR_045143,NR_045144,NR_045145	0	0	0	0	0.03	0	0	0.04	0	0	0	0	0	0	0.11	0	0	0	0	0	0	0	0	0	0	0	0	0	0	0	0	0	0	0	0	0	0	0.05	0	0	0	0	0	0	0	0	0.09	0.09
AA543186	NR_027448	1.34	1.28	0.99	2.67	1.21	0.95	0.9	2.31	0.65	0.78	1	1.04	1.15	1.87	1.53	0.93	0.96	1.09	1.6	1.62	1.37	1.71	1.7	1.9	0.98	1.96	1.36	1.67	1.45	1.6	1.51	1.32	1.9	0.72	1.69	1.67	2.06	1.66	2.15	1.56	2.46	2.18	2.71	1.53	2.24	2.45	2.18	1.49
AA543401	NR_102273	0	0	0.07	0	0	0	0	0	0	0	0	0	0	0	0	0	0	0	0	0	0	0	0	0	0	0	0	0	0	0	0	0.08	0	0	0	0	0	0	0	0	0	0	0.04	0	0	0	0	0
AA545190	NR_033776	0	0	0	0	0	0	0	0	0	0	0	0	0	0	0	0	0	0	0	0	0	0	0	0	0	0	0	0	0	0	0	0	0	0	0	0	0	0	0	0	0	0	0	0	0	0	0	0
AA619741	NR_033627	0	0	0	0	0	0	0	0	0	0	0	0	0	0	0	0	0	0	0	0	0	0	0	0	0	0	0	0	0	0	0	0	0.03	0	0.05	0	0	0	0	0	0	0.02	0	0	0	0	0.04	0
AA792892	NM_178894	0	0	0.07	0	0	0	0	0	0	0	0	0	0	0	0.25	0	0.17	0	0	0.1	0.13	0	0	0	0	0	0	0.05	0	0	0.08	0	0.06	0.03	0	0	0	0.07	0	0	0	0	0.13	0	0	0	0	0
AA986860	NM_177604	1.66	1.17	1.95	0.74	1.92	2.24	2.41	1.03	1.57	0.77	1.63	2.71	2.09	0.37	2.29	1.07	1.28	3.09	1.36	9.82	8.61	7.92	7.44	16.43	9.81	18.09	6.65	7.17	7.78	6.49	13.01	16.55	16.94	12.47	8.89	7.74	13.8	14.52	7.05	5.34	5.34	5.09	5.97	6.38	6.18	4.49	5.33	5.6
AA987161	NM_001163246	4.17	2.58	3.33	1.58	3.63	2.87	3.89	3.94	3.55	1.9	2.54	3.38	4.02	6.22	4.21	2.68	2.35	3.89	4.62	1.91	2.52	1.3	1.27	1.7	0.64	2.13	4.69	1.74	1.72	1.21	1.83	2.17	1.42	1.85	2.61	1.85	1.51	1.61	2.32	3.03	2.43	1.97	2.29	3.38	1.91	2.39	2.89	3.12
Aaas	NM_153416	8.13	9.21	10.15	8.87	8.9	10.08	10.9	9.76	9.63	10.91	8.05	10.53	13.1	10.17	9.94	11.26	11.18	9.57	10.01	14.62	13.35	13.17	16.91	15.19	14.25	15.27	20.8	13.58	15.48	15.03	13.85	15.07	15.33	13.7	17.34	18.28	13.71	13.18	14.87	12.55	11.92	16.02	13.29	15.4	13.03	13.14	11.3	12.13
Aacs	NM_030210	35.47	32.13	37.26	29.74	39.11	44.75	49.95	34.04	42.46	32.34	32.86	45.76	45.89	38.07	34.32	31.62	27.5	49.08	33.56	38.22	37.98	33.26	36.63	47.87	29.81	51.27	47.57	37.3	38.64	32.28	45.03	53.76	50.56	39.75	41.44	35.64	53.76	48.5	101.33	83.87	71.84	89.54	84.06	94.17	68.09	74.26	86.33	84.99
Aadac	NM_023383	2.41	1.09	0.26	1.38	0.24	0.51	1.13	2.38	1.1	0.43	1.69	0.31	0.51	0.77	1.01	0.72	0.33	0.66	2.56	0	0.06	0	0	0	0	0	0	0	0	1.24	0	0	0	0	0	0	0	0.48	0	0	0	0	0	0	0	0	0	0
Aadacl2	NM_001128091	0	0	0	0	0	0	0	0	0	0	0	0	0	0	0	0	0	0	0	0	0	0	0	0	0	0	0	0	0	0	0	0	0	0	0	0	0	0	0	0	0	0	0	0	0	0	0	0
Aadacl3	NM_001085503	0	0	0	0	0	0	0	0	0	0	0	0	0	0	0	0	0	0	0	0	0	0	0	0	0	0	0	0	0	0	0	0	0.03	0	0	0	0	0	0	0	0	0	0	0	0	0	0	0
Aadat	NM_011834	0.1	0	0	0.22	0	0.1	0.1	0.04	0.06	0	0.11	0.05	0	0.12	0	0.07	0	0.04	0.14	0.46	0.45	0.57	0.36	0.38	0.36	0.26	0.69	0.62	0.13	0.25	0.41	0.55	0.33	0.25	0.32	0.21	0.27	0.54	0.5	0.51	0.4	0.43	0.96	0.81	1.3	0.27	0.71	0.19
Aaed1	NM_025370	24.57	26.14	23.65	24.57	23.97	20.96	24.67	22.41	30.61	24.32	18.84	23.44	20.94	25.29	22.65	30.98	22.05	25.79	21.34	16.38	21.5	11.49	14.99	18.63	6.78	15.64	21.02	15.69	16.74	17.26	16.69	19.56	13.78	18.41	20.19	22.05	17.26	23.89	17.38	22	16.65	22.39	16.58	22.52	21.11	18.46	20.33	29.69
Aagab	NM_025857	32.12	31.83	28.98	25.89	35.71	36.31	36.11	33.06	34.89	26.35	30.48	34.97	35.1	37.7	30.69	28.03	26.56	35.43	31.2	26.44	27.63	21.69	23.3	28.3	20.51	27.52	32.95	27.2	28.75	25.1	27.95	29.27	29.06	26.41	28.77	25.91	32.5	29.72	30.92	27.62	28.22	27.17	28.3	33.2	23.62	29.83	27.22	30.31
Aak1	NM_001040106,NM_177762	3.5	3.33	3.42	3.67	4.35	3.7	6.45	3.24	5.44	2.47	3.3	5.16	5.13	4.61	3.64	2.73	2.54	4.95	3.43	2.86	3.21	2.09	2.67	4.64	0.73	3.99	6.34	2.2	3.62	2.28	3.61	4.5	3.54	3.32	3.87	2.85	4.24	4.47	16.76	13.76	7.48	11.55	9.76	16.65	8.74	11.54	11.64	15.33
Aamdc	NM_001177945,NM_001177946,NM_001177947,NM_183251	44.65	38.11	42.09	36.65	35.97	43.31	37.8	46.38	41.74	45.17	32.09	38.98	37.01	45.52	39.22	44.06	44.32	35.98	43.16	18.46	16.39	21.82	30.55	17.49	19.65	16.1	24.36	20.03	17.55	21.02	18.37	15.34	16.13	18.47	16.85	20.58	17.1	19.07	18.37	19.3	24.33	20.31	22.15	19.21	22.71	23.96	20.48	19.53
Aamp	NM_001190444,NM_146110	161.89	162.5	163.62	146.56	194.72	201.54	203.53	187.61	177.51	155.23	158.36	190.03	205.55	206.18	183.16	154.69	158.48	189.57	165.86	90.24	101.2	104.38	103.76	102.2	116.74	107.23	115.24	103.33	100.4	96.1	107.79	112.7	114.02	97.86	95.88	89.99	102.74	108.18	153.82	138.82	145.56	138.5	148.54	146.99	132.96	121	151.76	144.75
Aanat	NM_009591,NR_033223	0	0	0	0	0	0.04	0	0	0	0	0	0	0.06	0	0	0	0	0.06	0	0	0	0	0	0	0	0.14	0	0	0	0	0	0	0	0	0	0	0	0	0.07	0	0	0	0	0	0	0	0	0
Aar2	NM_001164818,NM_026661	9.3	8.9	7.63	6.88	7.55	8.62	8.96	10.12	10.49	8.11	6.71	9.91	8.66	11.61	9.59	9.41	9.03	8.95	9.28	6.61	8.02	6.53	9.59	6.83	5.89	5.87	9.55	7.29	8.47	6.85	6.24	7.71	6.36	8.19	7.76	6.48	7.2	7.06	8.08	8.79	7.82	8.42	8.05	10.4	6.3	7.47	9.38	10.05
Aard	NM_175503	2.44	5.6	1.69	4.85	4.33	2.32	2.29	2.33	3.84	4.31	2.22	2.49	5.41	3.12	1.68	6.68	3.34	2.47	2.76	0.82	0.54	1.35	1.25	0.44	0.86	0.62	0.51	1.17	1	0.4	0.96	0.51	1.18	1.5	0.32	0.48	1.16	0.72	0.22	0.3	0.38	0.61	0.57	0.32	0.49	0.36	0.73	0.38
Aars	NM_146217	42.76	43.38	42.92	33.19	48.16	48.01	52.19	40.35	48.18	34	40.8	49.17	47.38	54.04	55.35	37.26	38.22	46.57	39.61	36.8	38.91	27.88	39.72	41.61	27.3	38.62	41.26	35.87	40.46	33.95	36.58	42.61	39.17	40.64	41.96	38.28	40.37	39.9	41.78	35.99	32.56	36.46	38.47	41.92	27.51	32.9	37.02	37.39
Aars2	NM_198608	2.64	2.09	2.43	2.26	2.84	2.79	2.73	3.09	2.75	2.75	2.98	3.23	3.35	3.21	2.99	2.82	2.2	2.95	3.81	2.26	3.42	2.23	2.1	2.96	1.8	3.38	3.97	2.82	2.89	2.76	2.87	3.16	3.37	2.8	3.07	2.42	3.11	2.96	2.87	3.1	2.06	2.33	2.53	3.08	1.69	2.81	2.98	2.72
Aarsd1	NM_144829	40.93	37.94	34.94	34.36	41.3	42.07	42.48	42.04	38.67	37.32	39.8	44.87	40.69	38.28	33.98	39.74	37.73	44.19	41.66	47.07	42.5	43.61	45.6	50.26	55.29	43.36	54.26	51.93	42.49	42.06	48.35	43.89	47.16	43.32	46.65	40.52	43.24	44.41	56.54	51.17	54.28	52.27	62.95	58.64	56.1	49.41	59.82	57.67
Aasdh	NM_173765	3.43	2.69	2.62	3.79	3.2	3.72	3.88	3.06	4.15	2.61	2.61	3.83	4.58	3.72	2.05	2.69	2.15	3.46	3.47	3.22	3.18	2.27	3.53	3.66	1.35	3.64	4.53	2.6	2.71	2.66	3.12	3.88	3.8	3.67	3.47	3.27	4.65	3.07	4.54	4.19	2.81	3.52	3.8	4.2	3.22	3.56	3.37	4.84
Aasdhppt	NM_026276	27.07	20.82	21	15.61	24.62	19.03	24.29	20.5	22.68	18.26	20.17	25.44	22.9	26.74	27.19	17.12	21.68	21.51	20.45	15.37	15.35	13.52	11.35	12.32	10.03	15.99	15.59	14.81	14.23	12.4	14.21	12.19	15.42	15.98	14.88	15.59	13.73	15.02	17.93	16.97	17.26	14.04	15.89	16.68	17.25	19.23	18.01	19.76
Aass	NM_013930	20.98	13.86	18.94	14.06	14.53	20.66	18.76	13.88	17.97	9.14	18.59	19.03	20.14	10.9	10.81	10.68	6.71	19	17.4	1.07	0.66	0.67	0.44	0.73	0.54	0.92	1.15	0.65	0.48	0.76	0.71	0.74	0.88	0.86	0.57	0.75	0.75	0.88	2.3	1.28	2.86	1.19	2.79	0.76	0.86	0.63	5.67	3.18
Aatf	NM_019816	21.34	18.12	15.53	16.71	16.27	16.82	17.81	18.4	16.31	14.86	15.02	18.05	19.1	17.3	19.08	15.22	13	18.39	13.7	14.44	12.41	11.91	13.11	11.97	11.76	12.5	15.95	13.57	13.39	13.2	13.2	13.86	13.68	12.59	13.13	14.9	12.54	13.15	16.97	18.03	14.86	15.26	19.82	19.21	15.3	16.16	14.76	17.01
Aatk	NM_001198785,NM_001198787,NM_007377	0.19	0.5	0.16	0.19	0.42	0.28	0.29	0.31	0.53	0.53	0.18	0.29	0.32	0.54	0.34	0.57	0.73	0.26	0.34	0.54	0.38	0.34	0.61	0.24	0.29	0.36	1.07	0.39	0.74	0.46	0.38	0.22	0.5	0.3	0.27	0.24	0.2	0.18	0.07	0.29	0.11	0.07	0.13	0.19	0.16	0.11	0.07	0.19
AB124611	NM_001198794,NM_206536	0.98	1.03	0.39	0.65	0.93	1.43	0.79	0.66	1.81	2.77	0.47	0.86	1.13	1.27	0.59	1.42	2.27	1.84	1.08	1.37	2.29	0.98	1.93	0.83	1.98	1.35	1.26	1.3	1.47	0.93	0.69	0.83	1.15	1.3	1.32	1.9	1.23	0.99	1.82	2.45	2.5	1.2	1.64	2.56	1.72	2.48	2.18	2.47
Abat	NM_001170978,NM_172961	11.79	10.91	8.56	9.4	8.35	13.02	12.94	9.58	13.14	10	9.57	10.74	10.6	10.68	9.71	11.72	7.86	13.81	9.95	6.48	8.02	4.91	8.85	5.58	3.9	5.49	7.34	5.9	10.7	7.02	5.73	5.17	6.53	6.75	7.84	7.68	6.9	7.61	7.28	9.57	6.12	6.97	6.59	12.6	7.36	8.81	7.98	15.14
Abca1	NM_013454	22.29	21.32	17.74	15.88	28.14	20.82	33.86	18.2	29.09	17.3	18.09	28.38	21.68	33.64	29.56	21.39	16.95	27.87	18.53	10.92	13.96	7.22	10.46	13.49	6.14	14.12	14.69	8.76	16.46	10.47	10.8	11.39	14.94	11.29	14.63	12.11	14.9	15.44	13.52	13.31	9.04	9.28	10.3	17.4	10.77	11.36	12.07	21.14
Abca12	NM_175210	0	0	0	0	0	0	0	0.01	0.01	0	0	0	0.02	0	0	0	0	0	0	0.02	0	0	0	0	0	0	0	0	0	0.04	0	0	0	0	0	0	0	0	0	0	0	0.02	0	0	0	0	0	0
Abca13	NM_178259	0.04	0.03	0.02	0.07	0.05	0.02	0.07	0.02	0.13	0.01	0.03	0.03	0.01	0.06	0.06	0.09	0.07	0.05	0.01	0.05	0.03	0.02	0	0.03	0	0.03	0.07	0.02	0.01	0.01	0.04	0.01	0.03	0.04	0.03	0.01	0.02	0.05	0.59	0.51	0.25	0.4	0.32	0.78	0.36	0.3	0.49	0.54
Abca14	NM_026458	0.07	0.03	0	0.11	0.11	0.02	0.03	0.05	0.02	0.08	0.15	0.02	1.56	0.12	0.02	0.24	0.03	0.1	0.16	0	0	0.01	0	0.04	0	0.02	0.02	0.01	0	0.01	0.02	0.05	0.04	0	0	0	0.09	0.02	0.05	0	0.11	0.1	0.08	0.1	0.03	0.09	0.04	0.12
Abca15	NM_177213	0	0.03	0	0	0.01	0	0.03	0	0.02	0.04	0.05	0.02	0.68	0.08	0.04	0.02	0.13	0.04	0.15	0	0	0	0.12	0	0.05	0	0.02	0	0	0.01	0	0.02	0	0	0	0	0.04	0	0.42	0.34	0.32	0.38	0.29	0.5	0.15	0.59	0.29	0.43
Abca16	NM_001278943,NM_001278944	0.12	0.24	0.14	0.13	0.04	0.13	0.14	0.09	0.11	0.12	0.1	0.25	1.58	0.16	0.08	0.11	0.18	0.15	0.42	0.06	0	0.02	0	0	0	0.02	0.03	0	0	0	0	0.02	0.02	0	0.03	0	0.21	0.02	0.19	0.35	0.41	0.06	0.24	0.25	0.12	0.25	0.33	0.45
Abca17	NM_001031621	0.02	0.05	0	0.04	0.01	0.08	0.11	0.1	0.02	0.1	0.09	0.09	1.37	0.12	0	0.07	0.23	0.01	0.19	0.03	0.11	0.09	0.1	0.06	0	0.15	0.13	0.04	0.04	0.03	0.09	0.05	0.14	0.04	0.05	0.03	0.06	0.07	0.06	0.23	0.06	0.04	0.08	0.03	0.02	0.05	0.06	0.13
Abca2	NM_007379	60.56	56.34	66.37	52.31	80.37	87.37	120.04	114.09	82.16	40.68	64.4	93.8	97.55	135.06	63.52	57.65	38.65	97.13	131.52	98.31	142.92	57.82	109.1	143.93	47.15	117.6	201.76	84.49	145.38	93.18	133.07	180.73	115.37	125.58	173.44	79.27	175.85	156.83	292.03	239.07	140.56	228.64	195.88	327.9	112.32	172.92	218.98	258.56
Abca3	NM_001039581,NM_013855	48.84	45.63	41.77	35.36	41.05	52.36	63.83	50.8	61.18	32.15	38.45	62.17	55.21	53.3	47.09	42.81	29.66	63.24	60.57	110.44	123.94	62.89	97.47	143.44	42.34	112.95	147.82	98.6	129.59	82.37	113.8	177.55	114.5	127.34	149.14	96.47	140.83	134.7	162.76	106.46	83.78	114.36	116.06	156.49	69.74	100.04	132.27	134.95
Abca4	NM_007378	1.41	0.92	0.56	1.78	0.37	0.57	0.67	0.91	1.25	0.73	0.48	0.79	0.58	0.62	0.49	0.41	0.42	1.22	1.19	0.58	0.4	1.34	0.77	0.62	0.36	0.29	3.91	0.66	0.42	0.38	1.85	1.82	0.42	0.6	0.31	0.54	0.54	1.02	44.13	50.02	47.22	45.06	43.33	50.09	42.33	43.75	41.72	45.89
Abca5	NM_147219	15.81	13.35	11.66	11.43	16.37	13.42	20.39	11.49	21.73	9.19	14.24	18.4	14.73	20.93	21.37	11.5	10.23	16.81	10.23	31.88	36.11	14.74	21.29	36.94	9.99	36.01	21.34	24.32	35.04	20.83	31.07	35.17	30.2	38.99	43.09	23.88	43.2	36.33	10.18	8.39	5.68	6.14	7.31	10.74	6.5	9.27	9.28	11.32
Abca6	NM_001166556,NM_001166557,NM_147218	0.37	0.93	0.41	1.5	0.44	0.43	0.68	0.27	0.83	0.7	0.4	0.58	0.32	0.35	0.33	0.59	0.45	0.59	0.12	0.58	1.18	0.91	1.42	0.82	0.24	1.37	1.74	0.5	1.51	1.76	0.79	0.78	1.21	0.77	1.47	0.84	0.86	1.91	0.81	0.71	0.45	1.16	0.56	1.47	0.52	0.62	0.68	1.8
Abca7	NM_013850	0.9	1.15	0.62	0.88	1.27	0.9	1.57	1.51	1.58	1.16	1	1.27	1.27	1.73	1.79	1.54	1.34	1.62	1.57	0.87	1.26	0.94	0.98	1.29	1.02	1.97	3.02	0.75	1.62	1.58	1.43	1.97	1.99	1.33	1.63	1.73	1.5	2.11	1.72	1.76	0.87	1.87	1.25	2.44	0.97	1.31	1.55	2.39
Abca8a	NM_153145	1.14	3.01	1.18	3.75	2.13	2.06	1.88	0.91	4.86	3.18	1.31	1.66	1.38	2.54	1.44	3.91	3.44	4.27	1.5	2.72	6.72	2.48	5.69	3.11	3.63	3.08	5.05	2.57	7.28	3.5	3.12	2.69	2.15	2.05	4.68	5.33	4.28	6.93	2.57	5.08	3	3.31	2.66	5.91	3.11	3.93	2.75	7.51
Abca8b	NM_013851	0.6	0.86	0.4	1.13	0.65	0.55	0.75	0.32	1.19	0.92	0.59	0.58	0.49	1.38	0.66	0.9	0.88	0.95	0.58	0.7	1.15	0.51	0.89	0.8	0.08	0.75	1.49	0.46	1.04	0.42	0.68	0.47	0.75	0.55	0.93	0.97	0.71	1.31	0.55	1.41	0.59	0.68	0.64	1.11	0.98	0.91	0.63	1.62
Abca9	NM_147220	0.78	1.79	0.57	2.16	1.01	0.91	1.27	0.64	2.86	1.47	0.81	1.2	0.87	1.83	1.01	2.05	0.82	1.88	1.17	1.32	2.99	0.76	1.61	1.73	0.73	0.99	1.72	1.02	2.91	1.79	1.19	0.96	0.98	0.96	2.59	2.45	1.41	3.8	1.11	2.44	1.11	2.08	1.22	3.17	1.47	2.16	1.75	4.46
Abcb10	NM_019552	12.66	12.94	10.44	10	15.16	14.06	15.96	15.4	14.26	10.78	9.44	13.03	12.65	19.83	18.14	13.92	12.33	12.23	12.12	5.47	6.62	4.46	4.68	6.14	3.39	6.5	7.94	5.85	6.01	4.91	5.98	7.86	6.35	6.21	5.83	5.26	7.63	6.57	11.61	11.94	8.25	9.02	9.28	12.74	8.13	9.65	10.53	13.24
Abcb11	NM_021022	0	0	0	0	0	0.01	0	0	0	0	0	0	0	0.02	0	0	0	0.02	0	0.06	0	0	0	0.02	0.03	0.04	0	0.02	0.02	0.03	0.03	0.02	0.02	0	0	0	0.04	0.03	0	0	0	0	0	0	0	0	0	0
Abcb1a	NM_011076	2.77	2.77	2.53	1.21	2.65	2.83	2.53	2.61	1.35	1.21	2.98	1.21	2.82	4.99	3.52	1.28	0.99	0.99	7.14	1.31	0.53	0.82	0.74	1.24	0.48	0.99	5.16	1.39	0.61	0.5	0.69	0.24	1.71	1.64	0.52	0.99	0.57	0.56	1.24	0.63	0.87	0.34	1.52	0.73	0.37	0.37	1.52	0.53
Abcb1b	NM_011075	0.9	1.19	0.62	1.11	1.09	0.73	1.28	0.59	1.36	1.41	0.85	1.29	0.73	1.25	0.88	1.52	1.23	1.69	0.61	1.66	2.05	0.84	1.71	2.04	1.15	2.18	3	1.71	1.82	1.97	1.39	1.79	1.83	2.06	2.25	2.07	1.91	3.99	1.22	1.52	0.81	1.13	1.03	2.08	1.1	1.06	1.4	2.25
Abcb4	NM_008830	0.04	0.12	0.02	0	0.06	0.01	0	0.04	0.02	0.04	0.02	0.05	0.06	0.13	0	0.19	0.04	0.06	0.18	0.09	0.12	0.1	0.08	0.05	0.06	0.11	0.95	0.19	0.11	0.04	0	0.07	0.1	0.17	0.03	0	0.05	0.08	0	0.02	0.02	0.1	0.05	0.07	0.09	0	0	0.04
Abcb5	NM_029961	6.56	4.04	2.5	4.01	4.36	2.25	4.57	2.99	7.42	3.63	2.6	5.6	3.13	7.47	4.65	2.73	2.68	4.55	3.08	233.44	227.15	130.84	149.05	369.49	69.21	257.75	337.46	187.89	201.62	122.44	290.9	522.16	257.9	255.75	279.25	249.6	359.07	335.47	549.3	548.56	321.85	418.55	365.52	586.24	311.31	400.74	366.2	500.4
Abcb6	NM_023732	10.84	10.02	9.16	6.18	10.65	11.06	11.79	9.77	9.52	8.07	8.23	10.65	10.61	10.43	7.8	10.87	7.08	10.59	10.28	10.88	11.59	7.09	11.3	10.41	7.84	9.82	12.6	10.53	12.22	8.93	11.16	10.72	11.02	11.2	10.84	8.53	10.42	11.28	12.89	11.79	10.49	11.39	11.86	13.13	8.5	10.19	12.27	12.81
Abcb7	NM_009592	20.31	12.18	15.03	8.43	15.2	15.94	19.25	10.91	18.66	7.95	15.25	17.73	16.23	14.73	16.04	11.07	8.17	18.57	13.25	6.95	5.61	3.73	3.66	8.09	2.44	8.15	6.35	5.34	7.18	4.91	6.93	7.95	6.97	7.05	7.8	5.25	7.62	8.02	11.09	8.37	8.33	5.77	10.97	9.71	6.47	7.85	13	12.61
Abcb8	NM_029020	13.19	13.67	13.26	9.94	14.3	15.2	15.99	15.04	17.27	14.39	11.45	15.99	15.45	17.41	14.41	16.49	13.52	14.88	16.15	12.3	14.58	11.46	13.24	14.61	11.24	10.71	17.29	13.17	14.22	14.79	13.71	14.62	11.58	14.89	13.22	11.68	14.99	13.95	20.63	18.04	17.62	21.51	18.82	25.28	16.64	21.13	20.42	22.78
Abcb9	NM_019875	12.17	12.22	11.29	14.23	20.64	9.65	16.78	12.89	16.65	10.78	10.36	15.67	15.07	27.11	19.36	15.75	17.12	10.53	7.64	3.68	4.03	2.7	4.07	4.24	3.04	5.1	4.83	3.58	4.62	3.84	3.75	4.26	5.65	3.64	3.97	4.41	4.01	3.41	3.81	3.47	2.28	4.94	2.96	5.21	2.87	3.88	4.09	3.38
Abcc1	NM_008576	16.96	16.85	13.83	12.71	17.85	16.33	23.07	16.81	22.03	12.79	13.78	19.5	17.78	23.11	18.83	14.85	11.79	19.46	15.27	7.88	9.53	5.71	8.49	10.95	4.12	9.43	13.22	8.27	9.98	6.24	9.79	9.85	9.12	9.24	10.93	7.71	9.5	10.76	15.06	12.82	9.48	11.68	11.75	16.54	7.25	11.47	13.67	16.45
Abcc10	NM_145140,NM_170680	1.78	1.97	2.14	1.79	2.89	2.28	2.89	3.1	3.35	2.48	2.64	3.59	3.39	3.66	2.34	2.99	2.25	2.78	2.45	2.13	2.4	1.48	2.39	2.89	0.97	2.78	4.33	1.95	2.73	2.23	2.47	2.43	3.06	2.1	3.23	1.98	2.9	2.17	2.43	2.4	1.84	3.45	2.19	2.92	1.42	2.38	2.5	2.86
Abcc12	NM_172912	0.04	0.03	0.05	0.34	0.09	0.06	0.13	0.14	0.04	0.17	0.19	0.11	2.13	0.14	0	0.14	0.09	0.05	0.14	0	0	0.02	0	0.04	0.08	0.12	0.03	0.02	0.02	0	0.04	0.1	0.05	0	0.03	0	0.21	0.09	0.06	0.07	0.11	0.09	0.08	0	0.02	0.13	0.13	0.07
Abcc2	NM_013806	0	0.01	0.03	0	0.06	0	0.03	0	0.02	0.01	0.06	0.05	0.06	0	0.02	0.02	0	0.03	0.03	0.05	0.1	0.01	0.06	0.12	0	0.17	0	0.04	0.08	0.04	0.04	0.11	0.12	0.06	0.18	0.18	0.04	0.06	0	0	0	0	0	0	0	0	0	0
Abcc3	NM_029600	31.75	28.87	26.93	24	26.27	32.81	34.02	28.46	37.03	19.61	21.96	34.73	33.12	26.3	23.87	28.04	18.05	38.56	33.86	21.32	23.03	14.1	17.44	26.58	11.5	23.19	41.94	19.77	24.36	17.65	22.6	32	23.84	23	25.9	22.05	24.43	27.24	77.09	64.25	46.96	59.17	61.23	78.94	37.68	56.7	64.82	72.99
Abcc4	NM_001033336,NM_001163675,NM_001163676	11.94	13.77	11.12	14.02	16.24	10.35	21.29	20.24	17.53	13.28	14.41	17.91	14.17	28.52	25.73	11.72	16.26	12.62	12.28	1.88	2.09	1.72	0.82	1.89	1.38	1.6	3.36	1.87	2.03	1.65	1.62	1.32	1.73	1.34	1.68	1.37	1.85	2.13	2.35	1.87	2.05	1.41	2.01	2.42	2.01	1.61	2.11	2.38
Abcc5	NM_013790,NM_176839	7.13	9.32	6.71	10.92	8.54	7.86	8.59	6.57	10.89	11.12	5.71	10.6	9.15	10.46	9.97	12.82	8.17	9.91	9.49	11.99	14.27	8.29	10.45	16.5	7.19	15.32	15.64	9.41	14.27	11.47	12.69	16.51	15.74	12.9	14.56	11.98	16.19	16.97	9.4	8.48	6.59	7.76	7.27	9.75	6.95	6.4	7.37	9.89
Abcc6	NM_018795	0	0.03	0.03	0	0.04	0.01	0	0.03	0.04	0	0.01	0	0	0.02	0.02	0.03	0.02	0	0.03	0.04	0.03	0	0.05	0	0	0	0	0.02	0.04	0.03	0.03	0.02	0.03	0.02	0	0.04	0	0.02	0.02	0.06	0.04	0.02	0.03	0	0	0.05	0.04	0.03
Abcc8	NM_011510	1.24	0.57	0.46	0.47	0.23	0.42	0.47	0.59	1.15	0.65	0.31	0.63	0.5	0.41	0.23	0.16	0.2	0.77	1.1	1.96	2.26	2.31	2.41	3.32	1.53	1.78	8.01	1.65	2.45	2.05	4.38	4.62	2.28	2.29	3.34	1.51	2.88	3.61	29.62	26.26	18.96	29.06	22.45	32.65	16.7	23.57	22.35	27.91
Abcc9	NM_001044720,NM_011511,NM_021041,NM_021042	1.17	2.13	1.08	1.27	0.96	0.65	1.11	0.58	0.77	0.61	0.63	0.53	0.88	3.19	1.65	0.92	0.36	0.63	2.15	1.48	0.97	1	0.84	1.22	0.4	1.3	2.69	1.63	0.79	0.67	1.48	0.5	1.69	1.27	0.63	0.63	0.7	0.83	1.64	0.68	1.06	0.5	1.41	1.32	1.06	0.5	1.31	1.03
Abcd1	NM_007435	3.13	3.54	3.12	2.34	3.43	3.5	4.47	3.65	5.1	3.11	2.97	3.97	3.91	4.8	3.7	4.45	3.43	4.01	3.56	2.57	3.63	2.24	2.87	3.08	1.69	2.83	3.83	2.41	3.46	2.52	2.63	2.72	2.12	2.47	3.81	2.76	2.95	3.39	3.91	5.36	3	3.9	3.79	4.9	2.86	3.94	4.32	6.04
Abcd2	NM_011994	0.19	3.73	0.12	0.38	0.33	0.41	0.29	1.27	5.99	9.04	0.25	0.24	0.2	5.61	0.45	4.19	3.61	0.2	0.29	0.76	2.03	0.8	8.81	1.27	1.28	0.16	1.08	0.22	6.82	10.46	4.73	0.36	4.39	0.6	2.45	5.52	2.15	1.4	1.08	1.23	0.75	2.19	0.6	7.24	0.35	0.55	0.3	2.88
Abcd3	NM_008991	56.69	48.33	45.67	40.83	50.96	45.46	59.54	48.34	60.55	37.16	44.71	53.88	46.08	60.97	60.47	42.42	42.3	50.98	46.29	53.93	53.04	39.17	43.72	60.98	27.57	48.62	57.18	49.98	53.67	44.12	52.12	63.94	50.09	61.51	63.75	55.31	61.1	53.47	93.41	90.95	76.05	65.13	80.51	96.39	65.52	87.74	83.77	96.17
Abcd4	NM_008992	2.65	2.81	1.76	3.4	2.71	2.23	2.27	2.81	3.45	2.82	2.29	2.87	2.53	3.89	2.28	4.18	2.34	3.28	3.38	1.74	2.3	1.86	2.46	2.96	2.78	2.35	4.81	2.63	4.02	2.87	3.17	2.4	2.29	2.39	2.55	2.52	2.79	3.11	2.4	2.45	2	2.13	2.36	2.26	2.09	2.32	2.43	3.18
Abce1	NM_015751	28.69	23.63	21.97	19.7	26.36	21.86	29.5	22.66	33.15	18.95	23.14	24	24.1	33.91	27.35	26.78	23.33	23.91	22.18	25.14	28.71	19.69	21.42	24.95	11.57	26.65	30.64	20.62	26.24	21.18	25.19	27.5	25.41	27.31	29.58	26.05	28.68	28.07	34.6	35.4	29.35	25.52	33.07	40.75	32.39	34.97	30.81	41.05
Abcf1	NM_013854	29.68	29.88	27.53	23.84	32.49	28.66	35.58	30.71	34.36	24.52	29.74	33.79	32.29	37.47	35.83	28.52	27.19	32.23	25.58	26.75	29.16	23	26.66	28.5	26.53	30.43	35.7	27.19	31.48	26.11	29.35	35.27	30.9	30.82	28.49	29.06	31.14	29.84	38.23	37.06	28.58	32.27	35.45	42.23	28.54	33.1	38.1	36.09
Abcf2	NM_001190443,NM_013853	31.21	30.74	30.96	25.87	34.95	33.19	38.81	29.99	35.27	27.27	27.19	34.41	38.27	37.01	38.07	31.21	24.17	34.87	32.45	29.96	32.19	27.88	31.96	33.86	23.67	33.32	39.18	29.37	33.83	29.41	35.37	39.98	35.7	31.78	37.13	29.42	35.65	35.34	43.86	41.19	36.26	35.39	41.86	46.58	36.01	38.13	42.32	41.52
Abcf3	NM_013852	26.24	28.99	26.23	23.66	29.12	29.53	33.02	29.03	29.46	22.73	27.54	32.67	31.68	35.01	30.87	23.92	25.44	31.26	26.66	20.61	22.99	18.92	21.13	21.49	15.52	22.06	27.73	21.74	22	19.41	21.52	24.42	21.89	23.7	23.07	21.62	24.05	24.52	24.62	23.76	20.52	20.64	24.22	25.77	21.97	24.79	22.37	24.21
Abcg1	NM_009593	3.3	4.27	2.89	3.02	4.61	3.16	5.07	3.2	5.94	4.18	2.91	4.44	4.05	5.28	5.43	5.01	3.58	5.02	3.17	2.5	2.88	2.17	2.77	2.99	2.58	3.9	3.63	2.7	3.4	2.63	2.9	2.55	4.14	2.9	3.15	2.47	3.66	3.73	2.06	2.01	1.55	1.75	2.22	3.3	1.82	1.73	1.82	2.72
Abcg2	NM_011920	17.53	20.25	13.74	18.89	17.65	13.53	16.56	17.21	16.69	16.89	15.44	17.4	14.57	29.92	26.28	19.57	18.6	14.64	18.79	26.12	5.52	10.99	9.13	11.48	4.1	3.68	12.43	6.49	5.78	4.84	6.03	2.77	9.36	8.81	7.74	8.11	3.97	5.47	5.05	4.34	4.52	4.57	6.33	5.19	3.64	5.97	4.53	5.42
Abcg3	NM_030239	0.03	0.05	0.05	0	0.08	0.06	0.08	0.07	0.26	0.08	0.07	0.09	0.11	0.11	0.08	0.04	0.2	0.05	0	0.09	0.26	0.13	0	0.06	0.04	0.03	0	0	0.18	0.1	0.07	0.03	0.05	0	0.09	0.09	0.13	0.23	0.06	0.33	0.03	0.05	0.03	0.14	0.15	0.04	0.38	0.11
Abcg4	NM_138955	0.17	0.3	0.14	0	0.3	0.29	0.34	0.12	0.27	0.32	0.24	0.16	0.5	0.09	0.22	0.25	0.12	0.37	0.16	0.7	0.74	0.53	0.66	0.64	0.31	1.44	0.7	0.55	0.7	0.21	0.56	0.68	1.45	0.43	0.7	0.25	0.74	0.52	0.37	0.75	0.39	0.61	0.3	0.51	0.55	0.49	0.32	0.37
Abcg5	NM_031884	0.04	0.12	0.15	0.43	0.14	0.13	0.22	0.03	0.44	0.17	0.09	0.04	0.07	0.1	0.1	0.63	0.08	0.1	0.11	0.12	0.21	0.07	0.14	0.04	0	0	0	0.14	0.39	0.13	0.15	0	0.04	0.2	0.19	0.16	0.13	0.12	0	0.4	0	0.21	0.15	0.25	0.16	0.47	0.17	0.52
Abcg8	NM_001286005,NM_026180,NR_104382	0	0	0.03	0	0	0	0.03	0	0.1	0.1	0	0	0.08	0.04	0	0	0	0.02	0.03	0	0.02	0.03	0	0	0	0	0	0	0.04	0.09	0	0.03	0.03	0	0.04	0.03	0.06	0	0	0.06	0.03	0	0	0.12	0.03	0	0.03	0.05
Abhd1	NM_021304,NR_003522	20.34	23.54	21.43	18.66	21.53	22.15	23.51	21.95	27.23	22.92	19.35	29.36	22.28	25.95	29.43	24.59	27.17	25.8	20.38	15.58	15.75	13.7	18.8	16.71	17.44	19.93	21.55	15.16	18.01	17.72	15.92	22.17	20.81	16.04	14.18	13.17	19.33	18.78	25.97	24	25.51	25.16	22.27	26.82	19.86	27.68	20.2	23.41
Abhd10	NM_001272070,NM_172511,NR_073572	4.95	5.31	6.29	5.44	7.71	5.34	6	6.19	8.3	5.64	4.55	6.07	6.34	8.15	6.71	7.49	7.58	5.81	5.57	7.52	6.47	6.65	7.11	5.53	3.98	6.61	8.24	6.42	8.12	8.25	6.37	6.26	6.92	6.47	5.92	7.33	9.28	6.4	8.35	7.95	6.06	8.57	7.06	5.92	7.28	10.29	7.87	7.31
Abhd11	NM_001190437,NM_145215,NR_033794	48.21	48.66	50.41	66.82	52.28	55.44	50.89	54.99	47.39	48.26	44.64	54.37	56.53	59.18	41.19	56.37	46.2	59.54	55.75	62.29	62.12	64.37	69.09	58.88	74.39	73.37	75.36	60.67	63.86	72.36	63.26	59.1	74.11	60.31	57.75	63.33	56.53	60.52	85.87	90.59	93.44	92.45	88.55	90.19	90.74	90.92	80.9	79.92
Abhd11os	NR_026688	11.75	5.55	8.18	21.78	5.39	6.1	6.78	11.83	8.1	11.33	11.07	6.27	6.94	5.07	3.56	3.97	3.89	9.14	13.81	24.69	19.96	33.38	24.09	21.37	30.33	24.18	35.44	29.65	20.83	21.81	24.25	26.52	23.03	26.19	16.04	26.5	21.96	19.11	139.72	148.22	160.72	179.94	171.33	120.57	150.07	172.13	139.36	108.7
Abhd12	NM_024465	204.28	197.11	192.54	180.83	188.75	196.15	203.89	204.7	211.59	175.08	168.71	206.7	191.9	203.14	199.2	191.92	182.04	196.12	192.61	168.66	171.38	155.68	172.5	196.32	138.45	164.32	211.16	173.38	176.36	163.1	183.41	190.19	164.85	182.14	185.32	148.47	186.15	182.68	353.34	354.89	354	347.72	357.1	374.96	314.53	366.79	338.85	365.4
Abhd12b	NM_001195033	0	0	0	0	0	0	0	0	0	0	0	0	0	0	0	0	0	0	0	0	0	0	0	0	0	0	0	0	0	0	0	0	0.08	0	0	0	0	0	0	0	0	0	0	0	0	0	0	0
Abhd13	NM_001081119,NM_026868	12.91	9.03	10.48	8.85	11.67	9.46	11.92	10.29	12.92	8.29	8.28	10.2	9.99	14.51	11.05	9.52	7.82	10.18	11.21	12.09	12.39	8.7	9.89	11.94	6.38	14.55	13.24	11.58	10.8	9.37	11.34	12	12.01	12.3	13.55	10.95	13.03	10.28	20.48	20.47	14.91	14.5	16.9	20.96	14.48	15	17.87	19.21
Abhd14a	NM_001110271,NM_001110272,NM_145919	5.55	8.98	6.42	11.13	7.32	5.83	5.14	7.32	7.44	11.17	4.13	7.22	6.93	6.63	6.15	10.58	8.43	8.32	7.53	6.75	8.45	9.55	12.06	5.35	7.23	6.49	7.02	6.8	10.36	7.68	5.3	4.88	5.75	5.39	7.76	8.37	8.55	7.62	3.56	4.75	4.61	5.67	3.82	6.5	5.63	6.5	4.71	6.88
Abhd14b	NM_029631	47.98	57.89	46.54	49.17	51.99	46.69	49.18	63.46	53.75	53.01	41.35	49.49	45.78	56.09	57.89	51.97	51.33	53.83	50.76	19.77	21.35	18.53	20.21	16.7	15.18	17.87	24.26	19.9	21.18	17.65	19.41	18.99	17.34	18.71	17.81	18.22	18.04	20.93	17.62	15.11	16.97	12.93	20.03	16.28	14.2	12.55	20.45	17
Abhd15	NM_026185	0.25	0.53	0.29	0.06	0.3	0.34	0.49	0.46	1.01	0.97	0.18	0.34	0.47	0.93	0.36	1.12	0.55	0.28	0.28	0.25	0.49	0.28	1.19	0.47	0.27	0.26	0.29	0.17	1.49	0.92	0.61	0.32	1.1	0.24	0.35	0.64	0.47	0.5	0.67	0.51	0.34	0.57	0.53	1.29	0.25	0.33	0.53	0.87
Abhd16a	NM_178592	52.34	64.25	53.02	62.05	60.7	57.74	64.67	66.96	68.13	65.43	47.66	65.62	57.67	75.87	65.58	64.22	55.17	62.42	62.83	47.48	55.57	45.09	51.7	50	47.08	47.31	65.06	49.02	53.25	45.54	50.84	50.54	50.58	51.55	55.15	41.53	48.8	55.37	59.93	61.15	57.55	62.75	58.9	62.84	51.44	56.31	59.35	58.85
Abhd16b	NM_183181	0	0.16	0.14	0	0.18	0.1	0.14	0.16	0.06	0.18	0.08	0.11	0.87	0.12	0.33	0.07	0.14	0.13	0.28	0	0.18	0.04	0	0.16	0.29	0	0.08	0.13	0	0	0.09	0.38	0.09	0	0	0	0.27	0.15	0.22	0.11	0.17	0.27	0	0.16	0.05	0.27	0.22	0.09
Abhd17a	NM_145421	54.48	68.3	60.24	66.55	71.78	53.6	59.91	65.98	66.82	69.67	60.34	64.52	56.53	69.18	76.2	70.49	70.02	61.99	50.6	50.37	45.43	52.35	51.38	50.43	52.32	36.04	50.63	48.08	43.11	44.01	47.84	42.9	44.68	47.69	45.17	43.59	42.69	42.03	55.49	56.51	64.96	69.2	63.15	61.07	49.55	54.55	62.7	48.65
Abhd17b	NM_146096	11.37	8.93	9.79	8.29	10.39	12.62	13.46	6.69	11.72	7.41	9.49	10.34	14.31	8.13	12.02	10.3	9.62	10.33	8.6	14.98	14.19	12.22	11.37	16.68	10.15	23.06	11.37	13.7	18.38	11.34	16.59	14.89	18.64	18.23	19.37	14.46	15.96	16.4	23.01	19.2	20.04	13.14	18.21	20.9	21.03	19.07	20.09	22.31
Abhd17c	NM_133722	20.25	20.22	18.63	9.01	25.11	20.22	24.27	22.16	21.66	16.09	14.59	19.25	18.38	26.81	23.23	19.86	16.1	19.71	17.22	5.64	7.22	4.86	6.16	5.54	4.53	7.77	7.09	6.02	7.04	6.64	5.66	6.07	6.45	7.94	7.56	6.77	6.54	5.68	9.43	8.19	8.16	7.53	8.64	10.13	6.61	6.55	8.43	8.37
Abhd2	NM_018811	419.77	494.35	372.2	285	580.25	417.81	766.83	327.55	710.04	186.05	474.2	719.08	523.04	759.97	672.9	376.73	231.9	588.33	336.37	111.24	134.52	33.54	73.37	179.22	14.03	103.66	162.23	78.18	132.12	47.34	141.68	231.45	107.79	132.93	197.03	77.95	208.35	187.12	288.61	211.76	121.31	148.3	162.17	291.35	79.45	131.01	209.42	279.39
Abhd3	NM_134130	11.41	9.93	12.01	7.08	13.62	13.37	14.19	12.67	13.89	10.24	11.45	13.62	11	15.03	13.74	10.34	10.61	12	10.84	7.24	8.01	7.45	9.85	12.22	4.86	12.83	10.39	7.54	8.39	6.71	9.57	8.68	10.93	9.39	10.91	6.62	13.23	9.79	10.5	8.89	12.64	8.38	10.18	7.44	10.42	11.88	8.65	10.24
Abhd4	NM_001205181,NM_134076	41.56	51.34	41.41	36.21	44.56	37.93	44.4	43.2	51.44	40.31	33.13	44.33	40.39	58.73	50.32	45.57	34.57	43.66	41.14	37.47	38.26	31.52	33.47	36.13	26.67	33.39	57.94	36.47	41.65	36.39	33.44	32.62	33.46	36.22	37.32	35.46	33.13	42.11	41.17	35.28	36.41	34.11	37.67	44.93	33.57	32.93	37.82	40.2
Abhd5	NM_026179	21.52	19.15	21.75	16.01	20.11	22.53	22.7	13.01	23.95	22.32	17.7	21.53	26.08	17.43	17.89	17.56	17.31	22.59	15.53	22.78	21.14	20.64	23.61	27.96	20.41	25.64	19.01	20.95	26.81	24.28	29.04	39.14	25.78	20.21	21.92	31.23	21.83	28.35	20.18	17.22	18.21	17.93	18.7	21.56	21.32	16.28	19.54	19.98
Abhd6	NM_025341	5.1	5.57	5.23	4.86	5.56	5.58	5.34	5.61	7.1	6.3	4.8	5.39	6.11	6.2	4.2	6.6	5.25	4.95	6.72	6.04	7	5.75	5.77	6.21	4.41	7.43	7.89	6.31	6.56	7.45	6.21	7.09	6.4	5.68	7.35	6.45	6.51	6.32	7.33	8.7	7.13	6.45	6.96	6.66	7.17	8.92	7.88	7.31
Abhd8	NM_022419	12.24	12.42	11.82	17.1	16.87	12.39	15.08	14.97	16.06	17.22	12.4	15.92	16.78	14.32	12.45	15.28	15.58	17.92	13.67	18.89	20.84	20.78	18.63	20.71	17.8	16.54	22.98	19.99	18	17.09	18.98	18.9	19.04	20.14	19.27	17.1	18.35	20.07	23.5	22.66	19.65	28.23	25.03	22.34	19.31	22.44	21.9	18.17
Abi1	NM_001077190,NM_001077192,NM_001077193,NM_007380,NM_145994	38.92	29.24	33.71	33.73	36.54	35.71	42.11	26.81	42.95	31.42	31.63	41.01	36.71	36.86	41.69	32.62	30.39	40.53	27.7	29.99	26.67	22.5	23.96	34.83	17.32	36.36	31.26	26.29	32.43	25.14	30.21	33.49	33.86	31.25	33.75	28.24	29.96	36.36	39.14	33.52	31.6	26.74	33.78	40.1	35.58	36.6	35.87	41.05
Abi2	NM_001198570,NM_001198571,NM_198127	8.87	6.98	6.02	6.87	8.65	7.02	10.13	6.52	9.99	5.99	7.09	8.73	6.94	10.23	9.62	7.58	5.61	8.53	5.05	17.32	17.74	10.74	10.78	16.16	8.27	19.68	10.97	14.51	16.44	11.72	16.11	17.2	16.84	19.8	19.96	12.1	18.25	14.47	12.31	11.83	7.32	7.64	10	14.46	8.13	10.01	10.61	11.78
Abi3	NM_001163464,NM_025659	0.62	1.04	0.77	0.95	0.96	0.6	1.35	0.98	1.08	1.11	0.77	0.59	0.98	1.72	0.8	1.08	1.46	1.3	1.8	0.61	0.5	0.47	0.42	0.53	0.59	0.58	1.21	0.83	0.61	0.4	0.54	0.53	0.36	0.5	0.06	0.38	0.28	0.44	0.24	0.36	0.37	0.46	0.79	0.54	0.31	0.28	0.7	0.52
Abi3bp	NM_001014399,NM_001014422,NM_001014423,NM_001014424,NM_178790	2.72	5.41	1.75	7.3	3.15	3.11	3.47	1.79	7.81	7.17	2.02	2.85	2.58	3.44	2.82	8.05	6.34	6.02	3.13	5.73	7.91	5.1	7.19	6.26	5.22	4.25	9.07	4.15	9.62	6.91	5.45	4.01	4.03	3.52	8.31	8.65	5.76	11.15	4.79	7.19	5.59	6.89	4.62	11.23	7.95	9.14	6.02	15.29
Abl1	NM_001112703,NM_001283045,NM_001283046,NM_001283047,NM_009594	7.72	10.29	8.01	8.35	11.06	8.79	13.48	10.08	12.56	8.64	6.87	10.68	11.51	14.13	10.48	10.16	9.49	11.08	11.54	9.71	12.59	6.32	10.25	11.96	5.55	13.69	14.54	9.13	13.59	8.75	9.68	12.28	12.21	9.91	12.79	10.66	10.93	11.3	14.36	15.79	8.09	12.84	10.23	17.32	7.31	11.14	12.04	18.26
Abl2	NM_001136104,NM_009595	4.28	4.09	4.35	2.21	6.54	4.97	9.23	3.81	6.47	2.91	4.3	7.12	6.56	6.97	6.73	4.2	3.45	6.58	3.44	2.61	3.33	1.48	2.71	4.41	1.15	5.04	3.74	2.02	3.33	2.23	3.48	5.28	4.59	3.17	3.99	2.68	5.01	4.92	4.97	3.88	1.86	3.5	2.85	4.53	2.65	2.22	3.88	4.57
Ablim1	NM_001103177,NM_001103178,NM_001290813,NM_001290815,NM_001290816,NM_178688	9.29	11.93	9.51	9.9	11.36	9.69	16.43	11.61	14.9	11.58	9.89	13.55	11.51	17.03	15.39	11.51	11.07	13.48	10.61	7.86	9.41	5.23	7.86	8.63	4.53	7.81	10.94	5.75	9.49	8.22	7.2	7.79	7.39	5.94	9.54	9.41	8.02	8.82	9.23	10.06	6.15	6.99	7.66	11.79	6.16	9.28	7.73	13.61
Ablim2	NM_001177696,NM_001177697,NM_001177698,NM_001177699,NM_001177700,NM_177678	1.64	2.19	1.75	2.23	2.47	1.71	2.75	1.65	2.84	2.96	1.64	2.16	2.03	2.78	2.51	2.23	2.01	2.22	1.45	3.3	1.57	2.77	2.04	2.7	2.63	2.57	2.89	4.53	0.9	1.45	3.63	1.28	3.12	2.06	1.21	1.55	1.72	1.65	0.88	0.71	0.57	1.11	0.9	1.03	0.54	0.63	0.66	0.95
Ablim3	NM_001164491,NM_198649	0.34	1.72	0.26	0.6	0.32	0.48	0.47	0.72	1.31	1.29	0.36	0.4	0.7	1.4	0.5	1.58	0.86	0.64	0.75	0.56	0.84	0.6	0.7	0.5	0.3	0.23	1.67	0.46	1.61	1.14	1.26	0.07	1.63	0.26	0.77	0.75	0.5	0.7	0.55	0.95	0.47	0.54	0.6	1.57	0.22	0.53	0.43	1.18
Abo	NM_001290444,NM_030718	5.5	3.18	2.97	2.74	1.2	3.29	2.95	3.48	4.4	3.1	3.32	3.09	3.88	0.97	1.38	2.22	1.27	3.98	5.23	10.41	10.26	8.89	7.65	10.39	7.54	10.27	17.58	9.12	8.96	10.55	10.39	11.66	8.79	12.25	12.81	6.3	13.33	12.6	44.08	40.65	34.56	38.04	36.75	45.57	34.76	41.5	37.15	37.03
Abr	NM_001291186,NM_198018,NM_198894,NM_198895	7.68	8.63	6.62	5.25	7.36	7.34	8	7.36	8.47	7.13	5.54	7.4	6.96	9.49	7.59	7.53	6.15	9.05	10.12	7.76	6.21	6.33	5.08	6.84	3.58	6.83	13.26	6.99	5.82	6.06	6.12	6.18	7.17	6.83	6.1	4.75	5.89	7.81	17.77	17.02	9.87	14.93	13.43	19.4	11.5	15.48	12.9	17.5
Abra	NM_175456	0.05	0	0	0	0.04	0.03	0.05	0.08	0	0	0.04	0.11	0.14	0.12	0	0	0.05	0.09	0	0	0	0	0	0	0	0.1	2	0.58	0	0	0.06	0	0	0	0	0	0.06	0.95	0.06	0	0	0	0.03	0	0	0	0	0
Abracl	NM_028440	260.26	224.82	223.57	181.49	268.02	253.75	231.9	208.72	203.68	187.86	200.46	219.61	228.58	246.65	255.52	228.36	231.44	215.68	222.66	180.75	153.6	165.32	121.01	152.72	170.9	172.77	159.55	161.25	160.72	144.69	153.55	187.42	163.15	163.13	162.26	205.76	131.48	153.33	161.25	179.66	176.35	160.53	160.07	156.97	209.45	213.69	166.58	181.8
Abt1	NM_013924	5.12	3.96	5.24	5.61	5.54	5.01	5.66	5.16	4.81	3.78	4.28	5.2	5.02	6.19	4.11	4.71	4.42	5.03	5.71	4.64	4.23	5.37	3.12	5.33	4.73	6.09	6.44	4.85	3.94	5.48	5.12	5.29	6.04	5.65	5.13	4.68	5.49	4.73	7.53	6.91	6.78	6.83	8.52	6.91	6.41	7.25	7.4	6.63
Abtb1	NM_030251	11.12	10.67	10.59	10.66	13.11	12.22	12.54	17.83	13.14	13.59	9.78	14.71	11.6	17.58	13.54	14.14	14.29	11.68	15.28	9.84	8.68	9.51	7.87	9.27	8.81	9.27	15.75	10.86	8.83	10.9	9.4	9.12	8.16	8.54	9.28	9.16	9.47	8.57	12.32	13.79	13.99	13.68	12.43	13.64	10.11	9.59	13.44	12.6
Abtb2	NM_178890	0.49	0.35	0.61	0	1.5	1.07	1.47	0.37	1.02	0.45	0.74	1	1.27	0.99	0.41	0.51	0.59	1.32	0.23	0.37	0.38	0.27	0.18	0.69	0.63	0.98	0.35	0.27	0.34	0.21	0.42	0.77	0.97	0.43	0.25	0.32	0.69	1.15	0.28	0.29	0.5	0.19	0.36	0.31	0.46	0.49	0.29	0.33
Acaa1a	NM_130864	59.69	59.27	58.18	61.51	62.66	62.61	69.08	72.2	59.65	64.22	57.78	70.1	63.61	61.84	54.48	62.48	59.99	70.05	69.44	36.96	33.65	40.92	42.35	35.14	41.19	30.03	51.14	36.22	35.19	40.39	40.29	37.24	36.21	35.86	32.73	37.94	38.59	38.01	49.46	39.29	48.56	52.37	49.45	47.64	42.56	43.4	52.23	45.4
Acaa1b	NM_146230	4.12	7.32	4.1	9.12	4.55	6.79	5.5	6.36	7	10.21	4.98	6.91	4.97	6.63	3.76	7.14	11.01	6.27	6.54	2.2	2.96	2.91	5.97	3.02	4.74	2.43	4.21	2.4	8.12	23.6	5.22	4.5	6.71	4.19	2.8	4.45	5.13	5.36	3.57	4.24	3.2	3.49	4.17	4.38	3.33	3.34	4.61	3.22
Acaa2	NM_177470	113.25	138.04	109.04	105.48	113.94	114.61	112.28	113.61	119	114.16	88.51	106.3	100.34	132.39	151.06	134.75	136.17	115.36	99.98	51.58	58.06	69.95	55.76	47.27	63.59	45.12	88.34	52.75	61.99	65.34	59.34	41.37	51.44	55.25	47.49	53.97	51.51	72.4	111.35	100.85	113.47	114.55	109.65	117.93	124.4	113.2	104.67	113.31
Acaca	NM_133360	7.44	9.02	5.99	6.24	8.77	7.11	12.5	7.78	13.93	11.19	7.32	11.14	10.07	14.64	10.1	9.78	7.47	10.62	7.3	13.2	17.43	6.48	12.85	20.19	6.59	18.11	17.23	10.74	18.85	12.53	18.71	21.8	18.66	15.06	20.13	13.61	24.83	20.32	16.52	11.83	6.67	11.06	11.04	18.57	8.14	10.09	11.06	16.15
Acacb	NM_133904	1.01	1.87	0.86	0.5	1.43	0.85	1.44	1.38	1.55	2.01	0.8	0.7	1.03	2.3	1.24	1.33	1.35	1.4	1.49	1.39	1.44	1.04	1.3	1.74	0.45	1.64	1.56	1.3	2.61	2.04	1.97	1.62	2.06	1.63	1.68	1.74	1.45	1.68	1.08	0.75	0.56	0.82	0.86	1.35	0.71	0.81	1.64	1.55
Acad10	NM_028037	6.45	7.4	5.94	3.92	6.9	5.51	7.58	7.13	7.63	5.11	5.51	7.68	6.24	8.64	6.77	5.69	4.45	6.84	5.96	11.49	11.19	7.45	11.25	12.71	7.17	11.89	11.86	11.95	11.75	8.58	11.08	14.37	11.42	12.37	13.02	8.36	11.31	11.38	15.08	12.32	10.95	13.34	12.18	16.37	10.33	10.55	11.98	14.31
Acad11	NM_175324	29.61	27.04	25.8	21.54	30.3	28.48	29.24	25.67	32.92	26.27	26.46	31.01	26.92	35.31	32.22	25.88	25.96	29.63	24.12	19.27	20.12	14.64	17.9	21.79	8.87	20.55	25.16	18.3	21.76	18.43	19.31	22.21	21.08	19.79	22.73	16.54	21.84	21.68	36.11	30.3	30.74	28.22	31.26	34.62	25.46	28.03	30.39	31.7
Acad12	NM_178799	6.98	6.54	4.81	2.87	6.92	6.36	7.67	5.42	6.76	5.26	5.51	7.92	6.18	7.96	4.8	7.26	5.38	7.44	5.89	6.7	8.63	6.35	6.1	8.58	4.12	7.36	8.18	7.66	8.72	5.37	8.47	7.64	7.44	7.69	6.58	5.19	8.55	7.82	10.05	9	7.91	10.66	8.13	10.94	6.55	9.02	7.59	10.4
Acad8	NM_025862	46.5	46.18	43.49	38.71	44.06	48.7	52.7	55.8	45.64	42.23	41.19	47.06	48.72	57.29	47.46	41.7	44.05	50.01	49.58	21.63	21.8	21.67	22.66	24.77	17.91	23.37	32.92	21.22	20.85	19.67	22.73	24.36	22.59	23.29	21.33	22.6	23.63	23.51	40.75	39.2	39.14	38.58	40.66	41.84	36.45	42.9	40.46	39.48
Acad9	NM_172678	20.66	19.65	19.4	16.63	24.47	18.95	24.98	22.72	23.42	19.04	18.65	20.79	22.68	33.74	26.71	20.49	21.53	20.4	18.44	7.76	8.32	6.02	9.68	9.61	4.54	9.14	12.24	7.82	9.93	9.16	9.11	8.17	9.74	8.48	8.53	7.32	10.8	8.31	8.74	8.56	6.43	7.59	7.71	9.46	6.58	8.45	9.4	10.12
Acadl	NM_007381	35.55	31.12	26.66	31.63	32.1	26.94	30.96	26.15	34.61	30.49	26.83	31.01	27.18	34.35	36.03	37.73	33.84	35.22	28.03	12.86	14.35	14.94	19.72	11.63	14.23	12.74	17.88	14.36	17.95	23.18	14.25	12.12	15.69	14.92	12.54	16.64	12.21	17.46	15.1	12.2	16.45	10.2	15.23	15.65	11.74	10.34	15.35	14.65
Acadm	NM_007382	54.37	60.66	53.55	41.06	49.27	52.34	53.24	53.77	58.92	59.97	44.43	48.69	47.39	59.98	50.07	52.76	58.34	53.99	53.79	29.6	33.81	30.64	47.25	29.48	26.96	27.99	39.41	28.31	46.53	60.57	35	29.69	37.17	31.4	28.21	41.5	35.71	37.91	36.61	36.06	33.27	33.6	35.7	41.36	32.68	32.32	36.72	41.93
Acads	NM_007383	22.7	29.69	20.5	19.54	24.15	25.91	25.39	28.7	27.23	31.51	18.98	24.54	23.08	31.57	26.16	29.34	28.29	25.04	22.71	11.02	10.78	13.49	19.87	11.87	16.55	9.42	15.98	12.09	14.67	18.94	14.71	11.92	15.66	11.21	10.63	14.13	11.38	16.71	24.09	22.56	23.19	21.96	20.65	23.99	16.44	19.79	24.53	26.96
Acadsb	NM_025826	51.77	42.26	41.13	37.75	48.89	40.95	50.46	40.55	53.31	37.56	45.68	47.13	43.28	47.82	47.91	37.93	36.09	47.83	38.22	101.35	90.67	70.79	71.67	128.38	51.98	120.5	95.99	89.43	99.15	73.39	112.3	113.8	113.43	119.15	113.83	84.67	120.5	107.08	133.78	126.21	110.77	96.07	122.59	136.43	108.7	121.83	120.22	140.4
Acadvl	NM_017366	43.62	49.54	38.14	36.86	42.52	47.47	46.7	51.18	49.04	49.85	41.41	47.96	41.2	56.07	46.21	47.92	50.57	47.94	42.69	28.65	24.69	23.25	35.39	22.82	29.99	25.74	35.78	25.16	28.11	28.4	28.64	26.73	28.92	26.36	21.79	24.57	28.02	31.28	28.91	31.26	35.4	33.42	31.93	37.74	28.1	34.05	32.83	35.25
Acan	NM_007424	0.05	0.04	0.04	0.03	0.02	0.06	0.06	0.06	0.08	0.04	0.04	0.06	0.03	0.04	0.02	0.02	0	0.12	0.09	0.29	0.14	0.33	0.06	0.35	0.1	0.25	0.88	0.18	0.19	0.13	0.71	0.74	0.36	0.18	0.19	0.18	0.24	0.31	4.71	3.06	2.58	3.64	3.36	4.22	2.66	3.41	2.98	4.47
Acap1	NM_153788	22.49	19.49	20.49	22.27	42.69	17.94	32.27	24.61	36.23	23.82	22.98	34.66	30.96	59.5	45.39	25.78	34.49	25.36	23.18	4.16	5.22	4.69	5.36	5.8	4.68	5.19	11.99	4.48	4.73	5.58	6.65	5.8	6.66	5.31	5.2	4.86	6.2	6.64	23.18	24.6	20.31	22.86	18.83	25.71	19.82	26.24	17.15	22.85
Acap2	NM_030138	13.62	11.71	11.71	8.27	14.34	12.12	18.9	9.39	18.44	9.2	11.41	16.51	14.05	16.51	17.42	10.52	10.51	17.02	9.97	9.75	10.3	5.92	7.61	12.62	5.01	13.58	12.08	8.14	11.94	8.09	9.72	13.31	12.27	9.95	13.08	10.68	10.95	13.64	16	13.93	11.31	10.92	12.73	18.62	10.34	11.14	15.44	18.77
Acap3	NM_207223	2.6	3.74	3.51	3.91	4.9	3.87	5.43	4.3	5.34	4.05	3.35	5.38	5.22	4.24	3.55	3.71	3.85	4.26	3.7	2.34	3.4	2.35	3.75	3.69	3.3	4.61	4.18	2.45	4.32	3.63	4.27	4.2	4.31	2.17	3.68	3.34	3.05	5.11	6.03	7.47	4.96	7.17	5.17	8.18	4.57	6.22	5.97	8.24
Acat1	NM_144784	54.48	56.9	53.78	44.9	47.9	53.07	48.4	51.53	59.11	54.9	42.14	48.54	46.63	55.65	49.45	55.25	49.45	49.86	53.53	58.95	60.46	51.38	60.71	54.39	41.79	47.01	62.17	52.21	62.9	62.71	58.22	52.02	55.83	56.14	59.37	56.25	62.6	57.61	60.63	65.11	60.36	64.43	59.89	70.07	59.12	60.26	60.92	69.3
Acat2	NM_009338	172.9	130.99	155.95	108.78	138.75	166.93	160.97	146.38	146.49	106.6	138.44	152.21	148.18	148.36	147.89	114.39	98.27	158.69	153.85	231.51	206.04	212.8	204.84	262.1	169.07	211.25	251.9	231.53	207.32	202.97	259.12	286.51	233.59	238.55	218.19	197.33	268.96	235.61	391.34	314.48	340.23	342.26	363.2	354	345.83	349.06	342.82	332.54
Acat3	NM_153151	27.69	22.97	29.26	25.4	21.65	36.55	29.97	23.69	25.35	20.97	26.8	32.83	33.34	17.48	12.76	19.88	13.06	31.37	37.34	2.7	2.18	3	1.76	1.57	2.42	3.28	7.33	1.13	2.42	2.01	3.28	3.89	3.75	1.89	3.64	1.06	2.11	3.17	17.5	12.94	19.25	10.92	17.73	17.21	13.94	14.02	19.47	16.07
Acbd3	NM_133225	44.94	32.1	42.04	29.39	47.2	43.98	54.4	29.2	45.77	25.68	38.9	47.25	49.16	40.19	44.88	26.59	26.51	45.91	29.68	35.73	32.05	25.52	21.58	43.61	15.98	46.61	31.95	30.44	30.04	24.73	38.67	45.31	41.62	38.13	35.79	30.73	39.28	41.01	68.09	60.12	53.33	44.22	57.06	63.05	53.65	53.54	60.81	65.41
Acbd4	NM_025988	11.3	14.28	11.32	12.84	13.45	12.02	14.84	16.86	17.27	19.17	11.16	14.68	15.17	16.4	12.23	20.76	16.86	17.41	14.7	22.38	24.51	19.36	27.77	23.75	26.77	25.64	28.23	24.1	27.74	27.07	26	25.01	27.13	24.49	25.34	22.47	23.15	24.12	18.96	18.42	16.91	22.69	18.56	21.67	17.38	18.47	16.95	22.27
Acbd5	NM_001102436,NM_001102437,NM_001102438,NM_028793	37.77	25.18	33	24.63	39.68	32.44	42.72	26.16	39.19	21.23	35.04	37.2	34.64	39.09	38.28	23.42	23.39	38.8	29.4	25.7	23.38	17.24	17.77	33.57	11.21	35.96	25.8	22.79	27.58	19.72	27.91	31.82	28.45	31.41	32.59	24	29.52	32.63	37.61	33.33	29.25	23.21	35.04	37.41	30.07	35.66	35.28	38.02
Acbd6	NM_001145781,NM_026683,NM_028250	51.35	66.61	63.2	71.02	69.26	47.63	53.44	63.43	50.85	58.97	58.99	60.77	63.08	61.29	65.84	56.79	72.24	62.26	57.35	56.94	56.82	58.54	58.9	54.12	58.66	45.42	48.42	64.19	53.34	65	56.15	48.57	53.09	67.91	52.17	49.21	52.77	48.02	52.6	56.14	55.38	65.35	61.12	48.28	51.5	55.91	61.4	44.4
Acbd7	NM_030063	57.81	64.66	56.64	72.01	54.78	59.33	48.08	53.65	52.55	57.38	51.22	42.44	55.39	50.26	45.37	57.33	49.64	43.42	65.37	1837.25	2132.86	2034.03	1666.66	1649.19	1561.89	1928.68	1524.42	1702.43	1855.46	2267.74	1891.51	1331.64	1809.38	1935.74	2268.26	1580.3	2342.09	1521.41	897.44	1118.8	974.71	955.34	886.43	1014.77	1393.41	1183.71	808.21	1075.79
Accs	NM_001290782,NM_183220	1.49	1.67	1.31	1.28	1.7	1.6	1.72	2.01	1.75	2.08	1.27	1.64	1.82	2.59	1.72	1.63	1.49	1.52	1.65	1.18	1.32	1.11	1.55	1.11	1.04	0.86	1.91	0.86	1.63	1.32	0.91	0.96	1.22	0.92	1	1.02	1.35	0.89	0.78	1.02	0.71	1.28	0.86	0.91	0.78	0.92	0.79	1.38
Accsl	NM_001033452	0	0	0	0	0	0	0	0	0	0	0	0	0	0	0	0	0.08	0.03	0	0	0	0	0	0	0.06	0	0	0	0	0	0.02	0	0.04	0	0	0	0	0.04	0	0	0	0	0	0.06	0	0	0	0
Acd	NM_001012638	16.21	18.6	19.42	17.22	21.03	18.81	23.28	19.09	22.13	16.06	15.54	20.4	23.73	20.52	17.52	18.17	18.24	22.75	15.12	10.37	12.62	14.17	12.6	13.17	13.93	12.53	15.26	11.39	13.9	12.75	12.36	13.98	13.76	11.03	11.56	14.18	12.12	14.24	23.19	19.83	19.18	24.09	20.26	20.94	17.92	22.06	20.58	20.24
Ace	NM_001281819,NM_009598,NM_207624	452.26	384.2	508.13	366.17	321.25	567.05	563.84	394.37	493.79	287.08	367.35	592.71	589.21	258.16	278.36	312.76	197.64	597.17	643.83	15	20.22	14.01	19.07	19.49	14.05	14.4	28.33	15.44	20.69	16.5	19.29	19.49	19.31	18.14	19.44	14.55	20.02	28.07	146.73	90.07	125.92	92.52	142.84	89.69	40.06	58.68	283.67	171.63
Ace2	NM_001130513,NM_027286	1.1	1.74	0.99	1.02	1.12	0.91	1.05	1.24	1.53	1.37	0.84	0.94	0.95	1.9	1.67	1.13	1.21	1.01	1.37	6.25	5.91	3.38	5.86	7.19	4.25	4.81	4.1	3.95	6.54	5.79	6.83	3.89	6.1	4.98	8.84	4.12	8.01	6.34	0.65	1.47	0.88	1.31	1.05	2.23	1.86	2.13	0.59	1.7
Ace3	NM_001101453	0.04	0.22	0.04	0	0.03	0.11	0.04	0.06	0.05	0.1	0.03	0.09	1.05	0.05	0	0.24	0.38	0.1	0.37	0	0.04	0.04	0	0.04	0	0.08	0.06	0.04	0	0.03	0	0.04	0.11	0	0	0	0	0.04	0	0.05	0.27	0.09	0.06	0.13	0.04	0.16	0.09	0
Acer1	NM_175731	0	0.16	0	0	0.05	0.07	0.03	0.03	0.12	0	0.03	0	0.04	0.05	0.03	0.05	0	0.03	0.03	0.1	0.03	0.05	0	0.04	0	0.04	0	0.13	0.09	0.06	0	0.06	0.09	0.05	0	0	0	0.04	0.04	0	0	0.08	0.02	0	0	0	0.08	0
Acer2	NM_001290541,NM_001290543,NM_139306	5.51	5.42	6.22	2.54	4.04	4.74	5.82	6.73	4.9	4.9	4.39	5.62	6.05	8.34	6.16	3.92	4.52	5.53	9.21	22.57	24.61	12.31	17.74	28.83	12.38	26.15	22.09	19.62	25.44	17.83	21.81	34.79	26.36	26.49	28.65	25.25	23.09	26.65	5.25	8.01	3.93	5.47	6.64	9.9	5.6	4.68	7.79	6.61
Acer3	NM_025408	9.51	8.21	6.95	6.5	8.36	7.58	8.79	7.51	9.96	5.93	6.31	8.62	6.88	10.56	10.59	7.63	7.34	7.97	8.22	7.63	6.74	6.12	5.22	9.12	3.75	6.75	7.19	5.83	7.79	5.49	6.47	6.62	7.22	6.95	8.27	6.94	6.88	7.06	8.82	9.55	6.7	5.84	8.62	9.78	8.84	9.67	7.03	9.98
Ache	NM_001290010,NM_009599	0	0.88	0.11	0.53	0.28	0.05	0.27	0.26	0.14	0.03	0.09	0.26	0.11	0.29	0.27	0.06	0.54	0.17	0.15	0.25	0.29	0.49	0.06	0.31	0.4	0.66	0.85	0.35	0.35	0.07	0.28	0.48	0.93	0.3	0.45	0.41	0.44	0.24	0.22	0.23	0.41	0.28	0.09	0.26	0.12	0.05	0.44	0.08
Acin1	NM_001085472,NM_001085473,NM_001242605,NM_001242606,NM_019567,NM_023190	42.38	38.38	39.07	33.25	48	41.92	46.54	36.78	45.56	35.48	40.98	44.89	47.37	41.67	46.83	37.96	35.57	50.66	36.74	38.04	41.23	33.86	33.81	43.21	32.11	46.07	43.1	37.26	42.69	33.86	38.32	44.53	42.21	40.66	39.93	35.04	47.81	43.1	58.47	59.1	41.47	47.53	51.8	56.98	45.16	52.18	57.35	55.32
Ackr1	NM_010045	2.31	3.5	3.01	4.47	4.26	5.93	6.57	2.67	6.27	7.31	3.31	5.16	3.56	4.33	5.49	3.45	4.59	6.28	3.45	3.27	2.39	3.92	4.95	3.34	4.95	4.23	3.58	3.7	4.12	3.37	3.57	3.43	3.93	2.44	4.03	5.27	2.72	5.65	1.98	2.94	4.93	3.95	3.56	2.65	2.19	4.37	2.82	3.7
Ackr2	NM_001276719,NM_021609	0.15	0.29	0.06	0.13	0.17	0.16	0.2	0.14	0.24	0.53	0.21	0.13	0.22	0.3	0.16	0.69	0.79	0.23	0.17	0.45	0.44	0.21	0.26	0.1	0.26	0.25	0.59	0.21	0.8	0.77	0.27	0.2	0.22	0.51	0.47	1.22	0.32	0.44	0.27	0.63	0.23	0.59	0.26	0.44	0.3	0.45	0.27	0.72
Ackr3	NM_001271607,NM_007722	22.49	32.96	16.73	36.3	19.21	20.86	24.62	12.46	39.18	46.66	16.11	22.12	20.53	17.69	20.02	39.99	38.95	32.29	21.11	43.09	63.82	34.15	63.55	52.19	42.19	48.37	43.85	44.42	69.97	63.13	47.08	51.36	46.58	43.94	63.46	68.08	46.44	82.67	18.49	32.38	19.51	32.33	22.44	42.11	22.9	32.78	24.98	50.49
Ackr4	NM_145700	10.74	11.11	10.25	11.61	5.75	7.79	7.22	10.79	11.2	10.42	5.16	8.56	8.63	8.04	8.19	11.2	9.95	10.23	17.29	5.26	6.8	6.35	5.97	5.25	1.92	5.06	17.5	4.55	5.32	5.45	5.36	5.99	4.52	6.35	4.59	4.91	4.76	8.23	31.41	34.18	32.27	31.34	35.43	31.82	30.14	30.8	30.6	32.79
Acly	NM_001199296,NM_134037	514.93	418.87	484.16	357.15	530.15	587.01	646.32	434.77	540.04	321.96	473.56	586.79	589.92	502.71	498.49	373.47	314.06	611.26	474.29	292.82	315.79	198.21	247.97	356.71	158.02	343.23	314.18	269.18	310.5	236.85	326.4	375.9	343.24	317.8	369.58	258.75	351.93	354.78	321.25	246.52	236.63	222.98	279.21	298.22	193.25	218.67	330.81	287.5
Acmsd	NM_001033041	0.04	0	0	0	0.1	0	0	0	0	0	0	0	0.03	0.13	0.06	0	0	0	0	0	0	0.02	0	0	0	0.12	0	0.03	0	0	0.1	0.04	0.05	0.19	0	0	0.17	0	0.08	0.09	0	0.08	0	0	0	0.03	0.17	0
Acn9	NM_001077713	8.82	7.17	9.81	6.42	9.83	9.15	7.76	9.07	13.58	7.45	9.05	8.34	11.03	10.82	13.75	9.44	14.99	7.14	10.99	11.05	10.38	8.73	15.25	8.56	7.88	9.88	16.43	9.31	10.24	9.09	10.42	10.32	10.17	10.73	12.15	10.71	11.49	8.22	27.57	26.15	31.17	27.3	21.99	27.77	29.16	29.67	24.06	25.67
Acnat1	NM_001164565	0.99	0.88	0.77	0.66	0.71	0.64	1.08	0.85	1.02	0.66	0.5	0.83	0.69	1.51	1.21	0.81	0.6	0.78	0.94	0.93	0.89	0.85	0.56	0.96	0.54	1.26	1.39	0.77	0.83	0.82	0.75	0.76	0.96	0.83	1.25	0.84	0.79	0.88	1.28	1.74	0.98	0.3	1.11	1.93	0.81	1.47	1.09	1.66
Acnat2	NM_145368	0	0.08	0.16	0	0.04	0	0	0.14	0.3	0	0.14	0.06	0.12	0.31	0.09	0.11	0	0.1	0.11	0.13	0.06	0	0	0.29	0	0.11	0.4	0.05	0	0.1	0.04	0.07	0.12	0	0.26	0.34	0.07	0.19	3	3.11	3.27	2.47	3.17	4.12	2.64	5.22	2.73	3.18
Aco1	NM_007386	82.24	65.76	70.27	60.56	77.41	71.1	85.3	64.86	90.72	59.8	62.06	84.93	75.54	80.47	80.32	60.94	63.39	80.17	60.22	58.85	53.21	51.47	51.31	68.85	33.33	62.24	76.91	60.56	55.84	45.4	60.09	87.89	58.08	66.52	57.23	61.07	59.64	65.05	159.84	124.84	126.77	128.52	139.24	153.11	122.52	131.09	134.47	144.96
Aco2	NM_080633	123.95	112.34	108.13	96.68	107.77	103.69	118.43	106.17	127.66	105.09	95.53	109.84	113.15	128.75	125.43	107.95	103.52	118.65	100.55	120.82	117.42	93.07	106.02	129.43	78.87	112.56	145.32	113.07	120.41	113.2	125.67	127.6	124.03	124.44	138.57	98.94	135.57	133.36	155.58	130.58	123.9	124.62	135.58	156.45	112.03	122.05	130.37	145.59
Acot1	NM_012006	41.66	41.01	33.53	35.55	41.17	39.38	38.91	38.86	32.06	36.91	36.51	36.29	32.18	34.03	42.42	42.73	42.89	44.78	37.08	37	29.78	29.59	30.76	34.67	29.16	25.94	24.57	36.3	27.08	28.49	26.8	32.54	26.76	34.28	29.87	30.71	31.88	27.9	17.74	20.64	19.91	17.79	18.72	17.37	15.67	19.22	22.25	18.82
Acot10	NM_022816	0	0	0	0	0	0	0	0	0	0	0	0	0.12	0	0	0	0	0.06	0.08	0	0	0.01	0	0	0	0.08	0	0	0	0	0	0.13	0	0.03	0	0	0.08	0	0	0.12	0.16	0	0.04	0.39	0.08	0	0	0.25
Acot11	NM_025590	0.88	0.85	0.39	0.99	0.54	0.46	0.43	1.07	0.96	0.75	0.64	0.25	0.31	0.83	0.47	1.26	0.76	0.58	1.13	1.01	0.72	0.78	0.24	0.49	0.49	0.57	1.31	1.14	0.71	0.43	0.94	0.3	0.7	0.89	0.73	0.59	0.54	0.5	0.32	0.46	0.37	0.46	0.47	0.41	0.36	0.55	0.25	0.84
Acot12	NM_028790	0.06	0.05	0	0	0	0.08	0.22	0.05	0.03	0.13	0.09	0.06	0.16	0.11	0.15	0.08	0	0.05	0.16	0.03	0.03	0.05	0.06	0.06	0.04	0	0.13	0.13	0	0	0.11	0	0.08	0	0	0	0.03	0.03	0.61	0.46	0.39	0.84	0.54	0.56	0.36	0.54	0.25	0.76
Acot13	NM_025790	106.73	107.7	104.78	120.42	93.86	97.73	81.51	108.31	76.28	110.51	85.76	87.58	83.05	106.47	101.34	107.68	123.28	87.76	118	130.04	126.9	151.05	117.89	105.96	115.45	117.62	121.59	129.61	120.31	139.45	116.48	105.25	109.68	125.81	113.22	129.37	109.57	109.29	118.11	154.53	144.45	131.49	135.84	114.67	140.65	141.19	132.83	110.29
Acot2	NM_134188	6.92	7.09	4.03	5.97	5.48	4.34	5.27	7.71	5.87	5.17	4.68	4.48	4.34	8.11	9.53	6.9	3.98	6.05	5.97	6.72	6.61	4.61	6.38	4.98	4.26	4.6	7.35	6.71	6.51	4.99	4.85	4.91	5.31	7.28	5.74	4.94	6.73	5.63	3.95	6.48	3.2	4.96	4.66	5.25	2.46	4.31	5.5	6.28
[truncated: 22,008 more rows]
[truncated: 11 more columns]
